# Supplementary material for: Pain induces a rapid characteristic metabolic signature detectable in breath
Source: Research Square preprint supplement (doi:10.21203/rs.3.rs-6048423/v1), 2025-03-04
Supplement: Supplementary file 1 [file 8ceb23fda8d6dbd397dacc48.pdf]

Anfrage zur Teilnahme an medizinischer Forschung:

## Information und Einverständniserklärung der Pilot-Studie «Metaboliten in der Atemluft»

Sehr geehrte Dame, sehr geehrter Herr

Wir fragen Sie hier an, ob Sie bereit wären, an unserer Pilot-Studie «Metaboliten in der Atemluft» mitzuwirken. Ihre Teilnahme ist freiwillig. Alle Daten, die in dieser Studie erhoben werden, unterliegen strengen Datenschutzvorschriften. Die Pilot-Studie «Metaboliten in der Atemluft» wird durchgeführt von Translational Medicine Breath Research am UKBB und von der Abteilung für Klinische Psychologie und Psychotherapie, Fakultät für Psychotherapie, Universität Basel. Bei Interesse informieren wir Sie gerne über die Ergebnisse nach Abschluss der Studie.

In einem Gespräch erklären wir Ihnen die wichtigsten Punkte und beantworten Ihre Fragen. Damit Sie sich bereits jetzt ein Bild machen können, hier das Wichtigste vorweg. Im Anschluss folgen dann weitere, detaillierte Informationen.

### Warum führen wir dieses Forschungsvorhaben durch?

- Das Ziel der Pilot-Studie ist es, Metaboliten (Zwischenprodukte, die bei der Verstoffwechslung von Substanzen entstehen) in der Atemluft beim Einsatz eines Schmerzmittels zu untersuchen. Die Messung von Metaboliten in der Atemluft ist eine neue Methode, um die Einnahme und Wirkung von Medikamenten zu untersuchen, wobei der wissenschaftliche Nutzen darin besteht, die individuelle Aufnahme und Verstoffwechselung von Medikamenten bestimmen zu können.

### Was muss ich bei einer Teilnahme tun? – Was geschieht mit mir bei einer Teilnahme?

- Die Studie besteht aus zwei Terminen in einem Abstand von mindestens 24 Stunden am UKBB, die je eine Stunde dauern. Bei beiden Terminen setzen wir den sogenannten «Cold Pressor Test» ein. Beim «Cold Pressor Test» messen wir wie lange Sie ihre Hand im kalten Wasser halten können, wobei Sie bei einem der beiden Termine vor dem Test ein schmerzstillendes Medikament erhalten. Beim anderen Termin findet die Messung ohne schmerzstillendes Medikament statt. Die Reihenfolge der beiden Termine ist zufällig.
- Der «Cold Pressor Test» ist ein Standardverfahren in der Schmerzforschung. Dabei halten Sie Ihre Hand in ein 2°C kaltes Wasserbecken. Sie können Ihre Hand jederzeit zurückziehen, wenn es Ihnen unangenehm wird. Durch die Kälte wird Ihr Blutdruck und Ihre Herzfrequenz steigen, was ebenfalls im Rahmen der Studie kontinuierlich gemessen wird. Um die Metaboliten in der Atemluft zu messen, führen wir einen Ausatemtest durch. Hierfür blasen sie mehrmals in ein Röhrchen, welches an die Messmaschine angeschlossen ist (siehe folgende Abbildung).

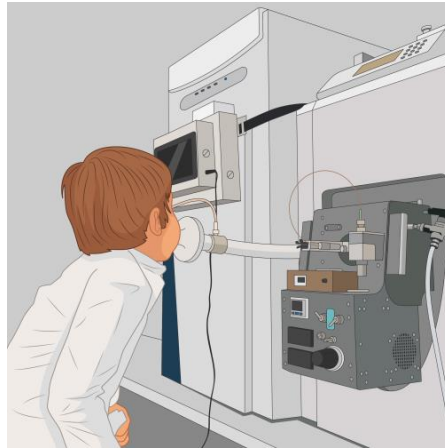

- Aufgrund des Studiendesigns können wir Sie vor Beginn der Studie nicht über alle Aspekte des Ablaufs informieren. Sie erhalten diese Informationen aber nach Abschluss der Studie und spätestens in 6 Monaten per Post.

### Welcher Nutzen und welches Risiko sind damit verbunden?

#### Nutzen

- Sie haben keinen direkten Nutzen, wenn Sie bei dieser Studie mitmachen.
- Sie helfen mit Ihrer Teilnahme künftigen Patientinnen und Patienten.

#### Risiko und Belastung

- Die Teilnahme an der Studie ist mit keinerlei gesundheitlichen Risiken verbunden, es ist aber möglich, dass Sie durch das kalte Wasser in Kombination mit den Ausatmungen Schwindel verspüren. Sollte dies eintreten, fordern wir Sie auf, mehr Pausen zwischen den Ausatmungen zu machen. Sie können jederzeit eine Pause einlegen und ein Arzt ist ebenfalls auf Abruf anwesend.

#### Entschädigung

- Wenn Sie bei dieser Studie mitmachen, erhalten Sie für die vollständige Teilnahme (Wahrnehmung beider Termine) CHF 100 als Entschädigung.

Mit Ihrer Unterschrift am Ende des Dokuments bezeugen Sie, dass Sie freiwillig teilnehmen und dass Sie die Inhalte des gesamten Dokuments verstanden haben.

## Detaillierte Information

### 1. Ziel und Auswahl

Unser Forschungsvorhaben bezeichnen wir in dieser Informationsschrift als *Studie*. Wenn Sie an dieser Studie teilnehmen, sind Sie eine *Studienteilnehmerin* bzw. ein *Studienteilnehmer*.

Wir wollen mit dieser Pilot-Studie Metaboliten (Zwischenprodukte, die bei der Verstoffwechslung von Substanzen entstehen) in der Atemluft beim Einsatz eines Schmerzmittels untersuchen. Die Messung von Metaboliten in der Atemluft ist eine neue Methode, um die Einnahme und Wirkung von Medikamenten zu untersuchen, wobei der wissenschaftliche Nutzen darin besteht, die individuelle Aufnahme und Verstoffwechselung von Medikamenten bestimmen zu können.

Personen, die innerhalb der Einschlusskriterien liegen und keines der Ausschlusskriterien erfüllen, können an der Studie teilnehmen. Die Kriterien sind wie folgt definiert:

#### Einschlusskriterien:

- Gesunde erwachsene Person
- Deutschsprachig oder sehr gute Deutschkenntnisse
- Fähigkeit, die Studie und ihre Ergebnisse zu verstehen
- Fähigkeit, eine informierte Einwilligung zur Studienteilnahme zu geben

#### Ausschlusskriterien:

- Regelmäßige Einnahme von Medikamenten, die das Schmerzempfinden beeinträchtigen können (Analgetika, Antihistaminika und Kalzium- und Kaliumkanalblocker)
- Schwanger
- Tägliche Raucher (gemäss der WHO-Definition: Ein täglicher Raucher ist jemand, der mindestens einmal am Tag ein Tabakprodukt raucht).
- Neuropathie (Erkrankung des Nervensystems)
- Chronische/langandauernde Schmerzen (> 3 Monate)
- Neuromuskuläre (Krankheiten, welche die Funktion der Muskeln beeinträchtigen) oder psychiatrische Erkrankungen
- Bekannte oder vermutete Herz-, Nieren- oder Lebererkrankung
- Bluthochdruck (Systolisch (mmHg) >130, Diastolisch (mmHg) >80)
- Vorgeschichte von Raynaud-Phänomen (symmetrisches Erblässen der Finger oder Zehen aufgrund von krampfartigen Verengungen der Blutgefässe)
- Vorgeschichte von Ohnmacht oder Krampfanfällen
- Vorgeschichte von Erfrierungen
- Aktuelle Medikamenteneinnahme (psychoaktive Medikamente, Narkotika /starke Schmerzmittel, Einnahme von Analgetika /schmerzstillende oder schmerzlindernde Arzneimittel) oder psychologische sowie psychiatrische Behandlung

### 2. Allgemeine Informationen

Der Atem enthält wertvolle biochemische Informationen auf der Stoffwechselebene. Ziel dieser Studie ist es, das Potenzial der Atemanalyse als nicht-invasive Methode zur Unterstützung der klinischen Entscheidungsfindung weiter zu erforschen. In dieser Studie untersuchen wir dazu Metaboliten, die infolge der Einnahme eines Schmerzmittels im Atem auftreten. Metaboliten sind Zwischenprodukte, die bei der Verstoffwechslung von Substanzen entstehen.

Das Schmerzmittel, welches im Rahmen dieser Studie eingesetzt wird ist in der Schweiz von Swissmedic zugelassen.

Die Studie besteht aus zwei Terminen à je 60 Minuten, die in einem Abstand von mindestens 24 Stunden am Universitäts-Kinderspital beider Basel, UKBB, Spitalstrasse 33, 4056 Basel stattfinden. Insgesamt werden 20 Studienteilnehmende in die Studie aufgenommen.

Aufgrund des Studiendesigns können wir Sie vor Beginn der Studie nicht über alle Aspekte des Ablaufs informieren. Sie erhalten diese Informationen aber nach Abschluss der Studie und spätestens in 6 Monaten per Post.

Wir machen diese Studie so, wie es die Gesetze in der Schweiz vorschreiben. Ausserdem beachten wir alle international anerkannten Richtlinien. Die zuständige Ethikkommission hat die Studie geprüft und bewilligt.

Eine Beschreibung dieser Studie finden Sie auch auf der Internetseite des Bundesamtes für Gesundheit unter [www.kofam.ch](http://www.kofam.ch)

### 3. Ablauf

Die Studie besteht aus zwei Terminen à je 60 Minuten, die in einem Abstand von mindestens 24 Stunden am UKBB stattfinden. Beim ersten Termin werden wir zunächst mit Ihnen die Einschlusskriterien überprüfen und allfällige Fragen Ihrerseits beantworten. Anschliessend werden Sie über den «Cold Pressor Test» im Detail informiert. Wenn Sie für eine Teilnahme geeignet sind und weiterhin teilnehmen möchten, unterzeichnen Sie die Einverständniserklärung.

Bei beiden Terminen setzen wir den sogenannten «Cold Pressor Test» ein. Beim «Cold Pressor Test» messen wir wie lange Sie ihre Hand im kalten Wasser halten können, wobei Sie bei einem der beiden Termine vor dem Test ein schmerzstillendes Medikament erhalten. Beim anderen Termin findet die Messung ohne schmerzstillendes Medikament statt. Die Reihenfolge der beiden Termine ist zufällig.

Der «Cold Pressor Test» ist ein Standardverfahren in der Schmerzforschung. Dabei halten Sie Ihre Hand in ein 2°C kaltes Wasserbecken. Sie können Ihre Hand jederzeit zurückziehen, wenn es Ihnen unangenehm wird. Durch die Kälte wird Ihr Blutdruck und Ihre Herzfrequenz steigen, was ebenfalls im Rahmen der Studie kontinuierlich gemessen wird. Um die Metaboliten in der Atemluft zu messen, führen wir einen Ausatemtest durch. Hierfür blasen sie mehrmals in ein Röhrchen, welches an das Messgerät angeschlossen ist (siehe folgende Abbildung).

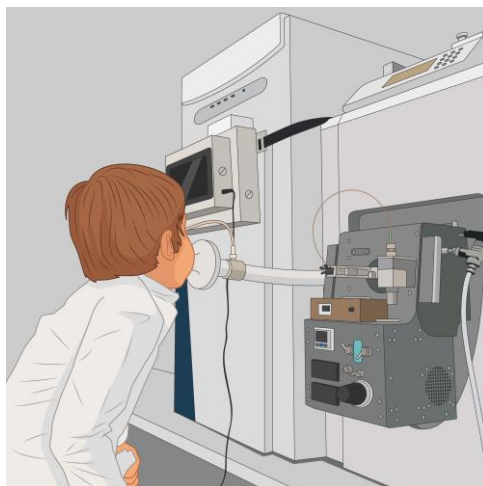

### 4. Nutzen

Sie werden persönlich keinen Nutzen von der Teilnahme an der Studie haben. Die Ergebnisse dieser Studie können wichtig sein für andere Personen.

## 5. Freiwilligkeit und Pflichten

Sie nehmen freiwillig teil. Wenn Sie nicht an dieser Studie teilnehmen oder später Ihre Teilnahme zurückziehen wollen, müssen Sie dies nicht begründen.

Wenn Sie an dieser Studie teilnehmen, werden Sie gebeten:

- Die vereinbarten Termine wahrzunehmen.
- Der Studienleitung neue Symptome, neue Beschwerden und Änderungen im Befinden zu melden

## 6. Risiken und Belastungen

Die Teilnahme an der Studie ist mit keinerlei gesundheitlichen Risiken verbunden, es ist aber möglich, dass Sie durch das kalte Wasser in Kombination mit den Ausatmungen Schwindel verspüren. Sollte dies eintreten, fordern wir Sie auf, mehr Pausen zwischen den Ausatmungen zu machen. Sie können jederzeit eine Pause einlegen und ein Arzt ist ebenfalls auf Abruf anwesend.

## 7. Ergebnisse

Gerne lassen wir Ihnen, falls gewünscht, am Ende der Studie eine Zusammenfassung der Gesamtergebnisse zukommen.

## 8. Vertraulichkeit von Daten und Proben

### 8.1. Datenverarbeitung von Verschlüsselung

Für diese Studie werden Daten zu Ihrer Person und Gesundheit erfasst und bearbeitet, teilweise in automatisierter Form. Bei der Datenerhebung werden Ihre Daten verschlüsselt. Verschlüsselung bedeutet, dass alle Bezugsdaten, die Sie identifizieren könnten (Name, Geburtsdatum etc.), gelöscht und durch einen Code ersetzt werden. Personen, die keinen Zugang zu dieser Schlüssel-Liste haben, können keine Rückschlüsse auf Ihre Person ziehen. Die Schlüssel-Liste bleibt immer im Spital.

Nur sehr wenige Fachpersonen werden Ihre unverschlüsselten Daten sehen und zwar nur, um Aufgaben im Rahmen der Studie zu erfüllen. Diese Personen unterliegen der Schweigepflicht. Sie als teilnehmende Person haben das Recht auf Einsicht in Ihre Daten.

### 8.2. Datenschutz und Schutz der Proben

Alle Vorgaben des Datenschutzes werden streng eingehalten. Es ist möglich, dass Ihre Daten in verschlüsselter Form, zum Beispiel für eine Publikation, übermittelt werden müssen und anderen Forschern zur Verfügung gestellt werden können.

### 8.3. Einsichtsrechte bei Kontrollen

Diese Studie kann durch die zuständige Ethikkommission überprüft werden. Die Prüfarztin/der Prüfarzt muss dann Ihre Daten für solche Kontrollen offenlegen. Alle müssen absolute Vertraulichkeit wahren.

## 9. Rücktritt

Sie können jederzeit von der Studie zurücktreten. Die bis dahin erhobenen Daten und Proben werden in diesem Fall allerdings noch verschlüsselt ausgewertet.

## 10. Entschädigung

Wenn Sie bei dieser Studie mitmachen, erhalten Sie für die vollständige Teilnahme (Wahrnehmung beider Termine) CHF 100 als Entschädigung.

## 11. Haftung

Das UKBB, welches die Studie veranlasst hat und für die Durchführung verantwortlich ist, haftet für Schäden, die Ihnen im Zusammenhang mit der Prüfsubstanz, und/oder der Forschungshandlungen (z.B. Untersuchungen) entstehen könnten. Die Voraussetzungen und das Vorgehen dazu sind gesetzlich geregelt.

Obwohl diese Studie kein vorhersehbares Risiko beinhaltet, haftet das UKBB nach den gesetzlichen Bestimmungen für alle Schäden, die im Rahmen dieser Studie entstehen könnten.

Sollten Sie durch die Teilnahme an dieser Studie einen Schaden erleiden, so wenden Sie sich bitte an die Prüferin/den Prüfer/die Prüfperson.

## 12. Finanzierung

Die Studie wird vollständig finanziert durch die Fondation Botnar über die Professur des Hauptprüfers und den Schweizerischen Nationalfonds (173168). Die Entschädigung der Teilnehmer wird von der Abteilung für Klinische Psychologie und Psychotherapie, Fakultät für Psychologie, Universität Basel übernommen, die auch die Studie mit Doktoranden und Masterstudenten unterstützt.

## 13. Kontaktperson(en)

Sie dürfen jederzeit Fragen zur Studienteilnahme stellen. Auch bei Unsicherheiten oder Notfällen, die während der Studie oder danach auftreten, wenden Sie sich bitte an:

Für Fragen bezüglich der Studie im Allgemeinen: Mélina Richard, UKBB Spitalstrasse 33, 4056 Basel, [Melina.Richard@ukbb.ch](mailto:Melina.Richard@ukbb.ch)

Projektleitung: Prof. Pablo Sinues, PhD (Projektleiter), UKBB Spitalstrasse 33, 4056 Basel, [Pablo.Sinues@ukbb.ch](mailto:Pablo.Sinues@ukbb.ch)

## Schriftliche Einwilligungserklärung zur Teilnahme an einer klinischen Studie

Bitte lesen Sie dieses Formular sorgfältig durch. Bitte fragen Sie, wenn Sie etwas nicht verstehen oder wissen möchten. Für die Teilnahme ist Ihre schriftliche Einwilligung notwendig.

|                                                                                                    |                                                                                                                         |
|----------------------------------------------------------------------------------------------------|-------------------------------------------------------------------------------------------------------------------------|
| <b>BASEC-Nummer:</b>                                                                               | 2021-01132                                                                                                              |
| <b>Titel der Studie<br/>(wissenschaftlich und Laiensprache):</b>                                   | Pilot-Studie, Metaboliten in der Atemluft                                                                               |
| <b>Verantwortliche Institution<br/>(Sponsor mit Adresse):</b>                                      | Prof. Dr. Pablo Sinues (Projektleiter)<br>Universitäts-Kinderspital beider Basel, UKBB,<br>Spitalstrasse 33, 4056 Basel |
| <b>Ort der Durchführung:</b>                                                                       | Universitäts-Kinderspital beider Basel, UKBB,<br>Spitalstrasse 33, 4056 Basel                                           |
| <b>Prüfärztin/Prüfarztes/Prüfperson am<br/>Studienort:</b><br>Name und Vorname in Druckbuchstaben: | Mélina Richard (PhD Studentin)                                                                                          |
| <b>Teilnehmerin/Teilnehmer:</b><br>Name und Vorname in Druckbuchstaben:<br>Geburtsdatum:           |                                                                                                                         |

- Ich wurde von der unterzeichnenden Prüfärztin/dem unterzeichnenden Prüfarzt/Prüfperson mündlich und schriftlich über den Zweck, den Ablauf der Studie mit der Prüfsubstanz, dem Prüfgerät und dem Verfahren, über mögliche Vor- und Nachteile sowie über eventuelle Risiken informiert.
- Ich nehme an dieser Studie freiwillig teil und akzeptiere den Inhalt der mir ausgehändigten schriftlichen Information. Ich hatte genügend Zeit, meine Entscheidung zu treffen.
- Meine Fragen im Zusammenhang mit der Teilnahme an dieser Studie sind mir beantwortet worden. Ich behalte die schriftliche Information und erhalte eine Kopie meiner schriftlichen Einwilligungserklärung.
- Ich bin einverstanden, dass die zuständigen Fachleute der zuständigen Ethikkommission zu Prüf- und Kontrollzwecken in meine unverschlüsselten Daten Einsicht nehmen dürfen, jedoch unter strikter Einhaltung der Vertraulichkeit.
- Ich kann jederzeit und ohne Angabe von Gründen von der Studienteilnahme zurücktreten. Meine weitere medizinische Behandlung ist unabhängig von der Studienteilnahme gewährleistet. Die bis zum Rücktritt erhobenen Daten und Proben werden noch im Rahmen der Studie ausgewertet.
- Die Haftpflichtversicherung des Spitals/ der Institution kommt für allfällige Schäden auf.
- Ich bin mir bewusst, dass die in der Informationsschrift genannten Pflichten einzuhalten sind. Im Interesse meiner Gesundheit kann mich die Prüfärztin/der Prüfarzt jederzeit von der Studie ausschliessen.

|            |                                      |
|------------|--------------------------------------|
| Ort, Datum | Unterschrift Teilnehmerin/Teilnehmer |
|------------|--------------------------------------|
