# Supplementary material for: Pain induces a rapid characteristic metabolic signature detectable in breath
Source: Research Square preprint supplement (doi:10.21203/rs.3.rs-6048423/v1), 2025-03-04
Supplement: Supplementary file 1 [file 10a6cb29d8814ddea40e527d.docx]

**Pain induces a rapid characteristic metabolic signature detectable in breath**

Mélina Richard1,2, Kapil Dev Singh1,2, Dilan Sezer3, Sarah Buergler3, Luana Palermo5, Yannick Schulz3, Zhifeng Tang4, Xin Luo4, Urs Frey1,2, Philippe C. Cattin2, Xue Li4, Jens Gaab3, Pablo Sinues1,2*

1 University Children's Hospital Basel (UKBB), Spitalstrasse 33, 4031 Basel, Switzerland

2Department of Biomedical Engineering; University of Basel, Hegenheimermattweg 167b, 4123 Allschwil, Switzerland

3Faculty of Psychology; University of Basel, Missionsstrasse 60/62, 4055 Basel, Switzerland

4College of Environment and Climate, Institute of Mass Spectrometry and Atmospheric Environment, Guangdong Provincial Key Laboratory of Speed Capability Research, Jinan University, Guangzhou 510632, China.

5University Hospital of Child and Adolescent Psychiatry and Psychotherapy, University of Bern, Bern Switzerland

*corresponding author: [pablo.sinues@unibas.ch](mailto:pablo.sinues@unibas.ch)


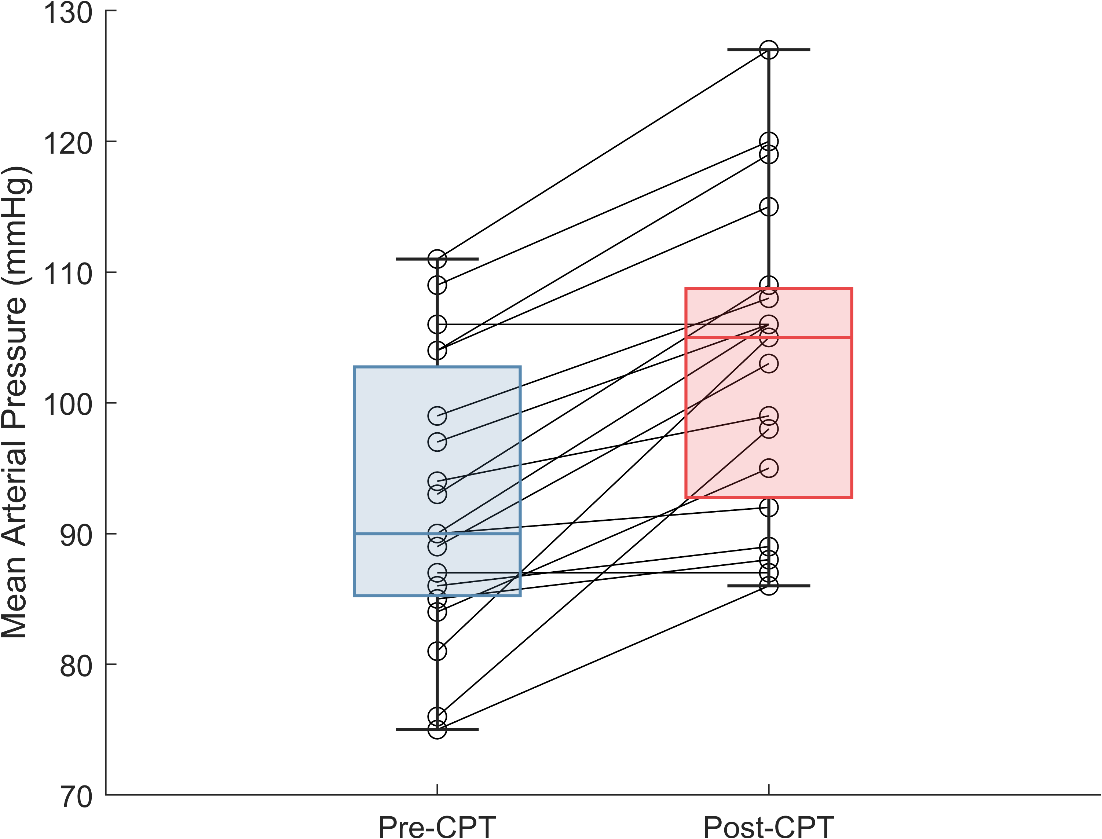


**Fig. S1 Mean arterial pressure increases upon CPT intervention**

**
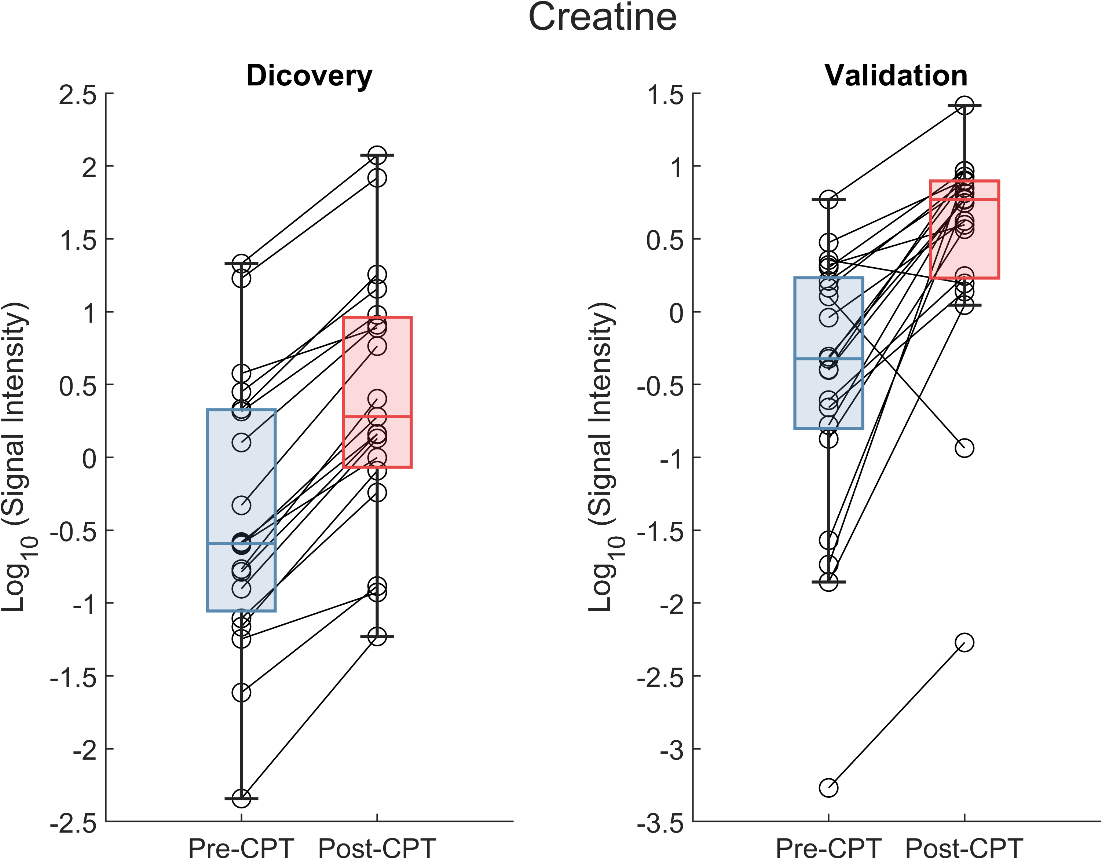

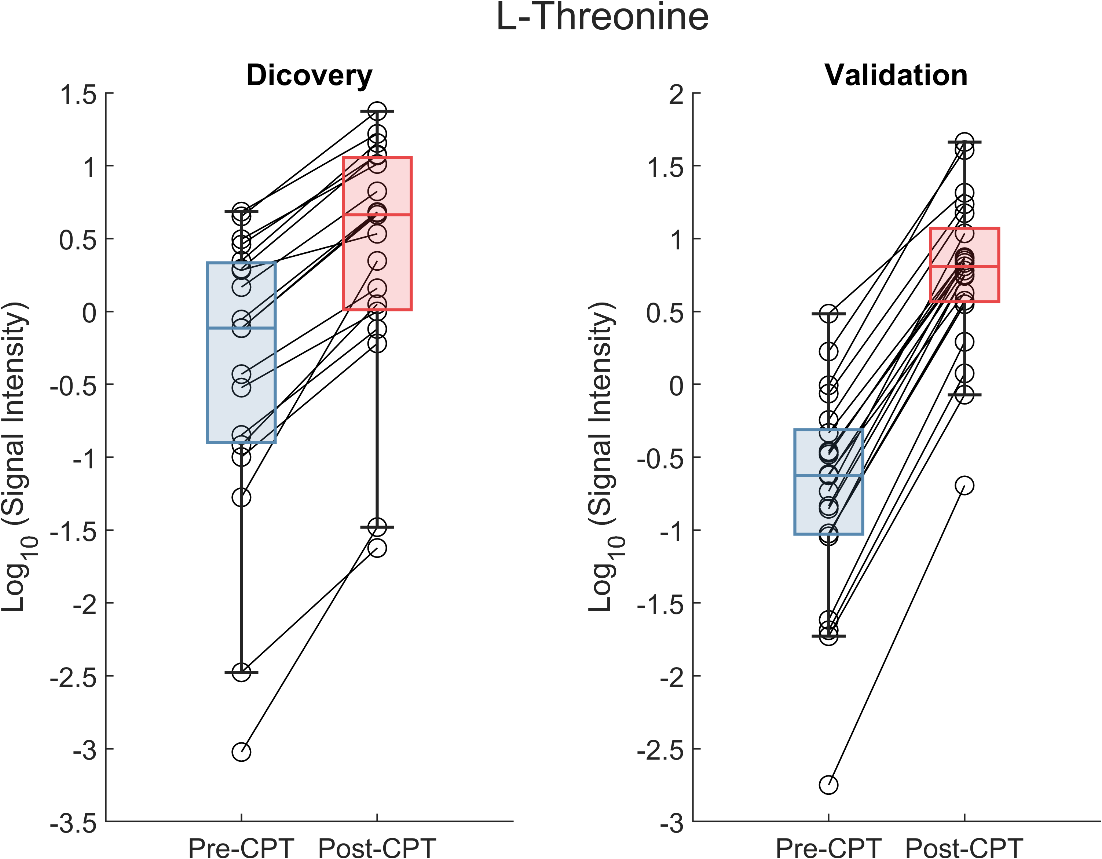

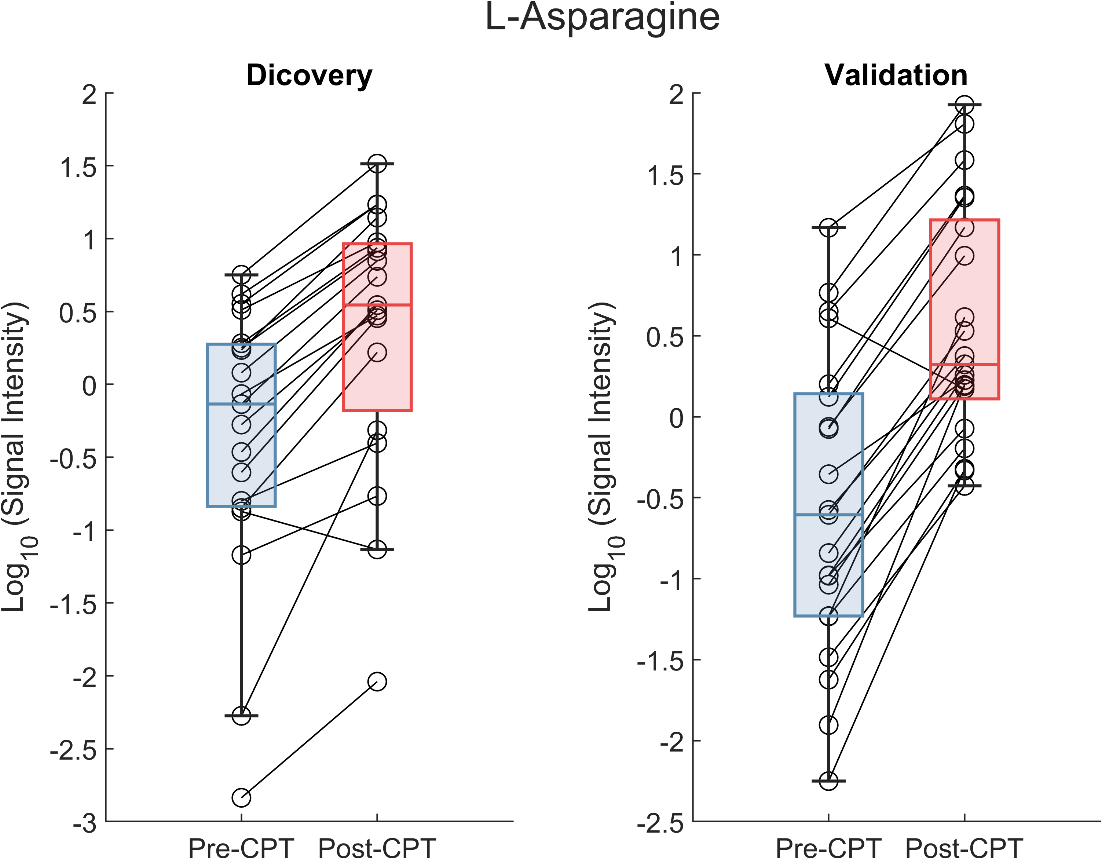

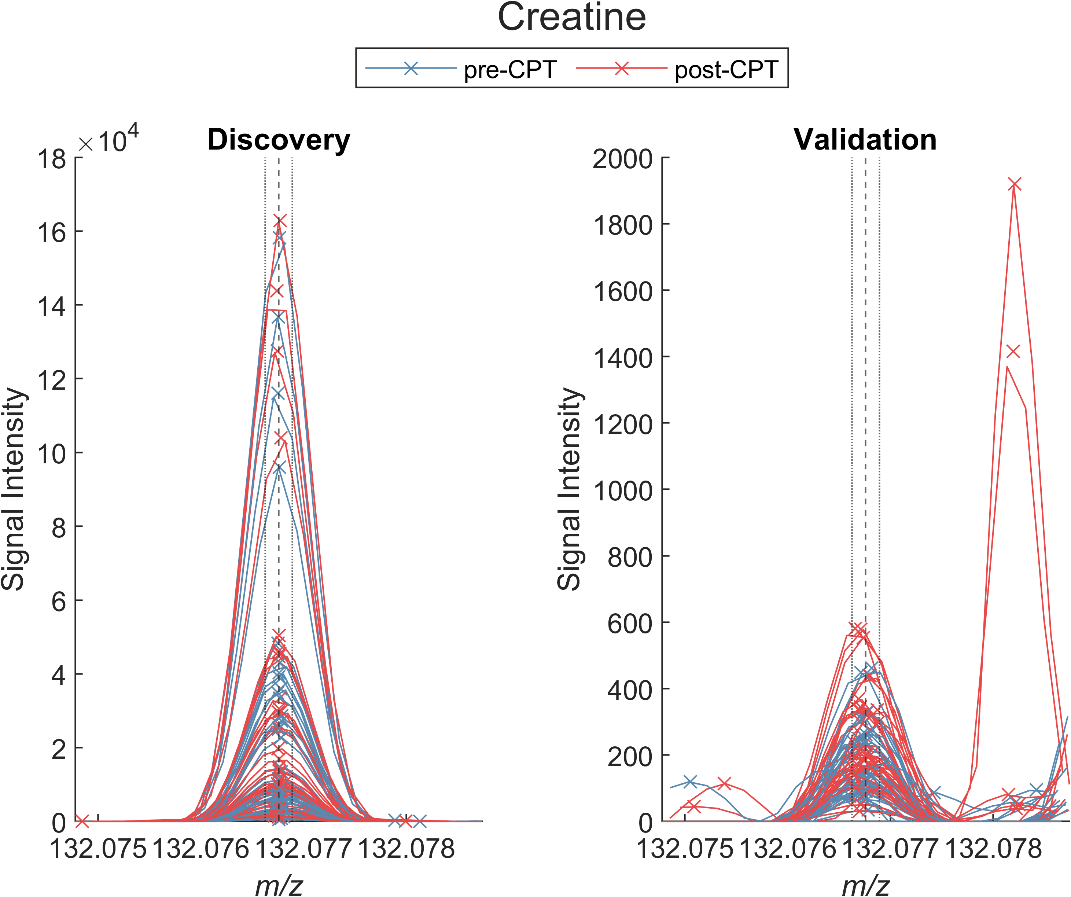

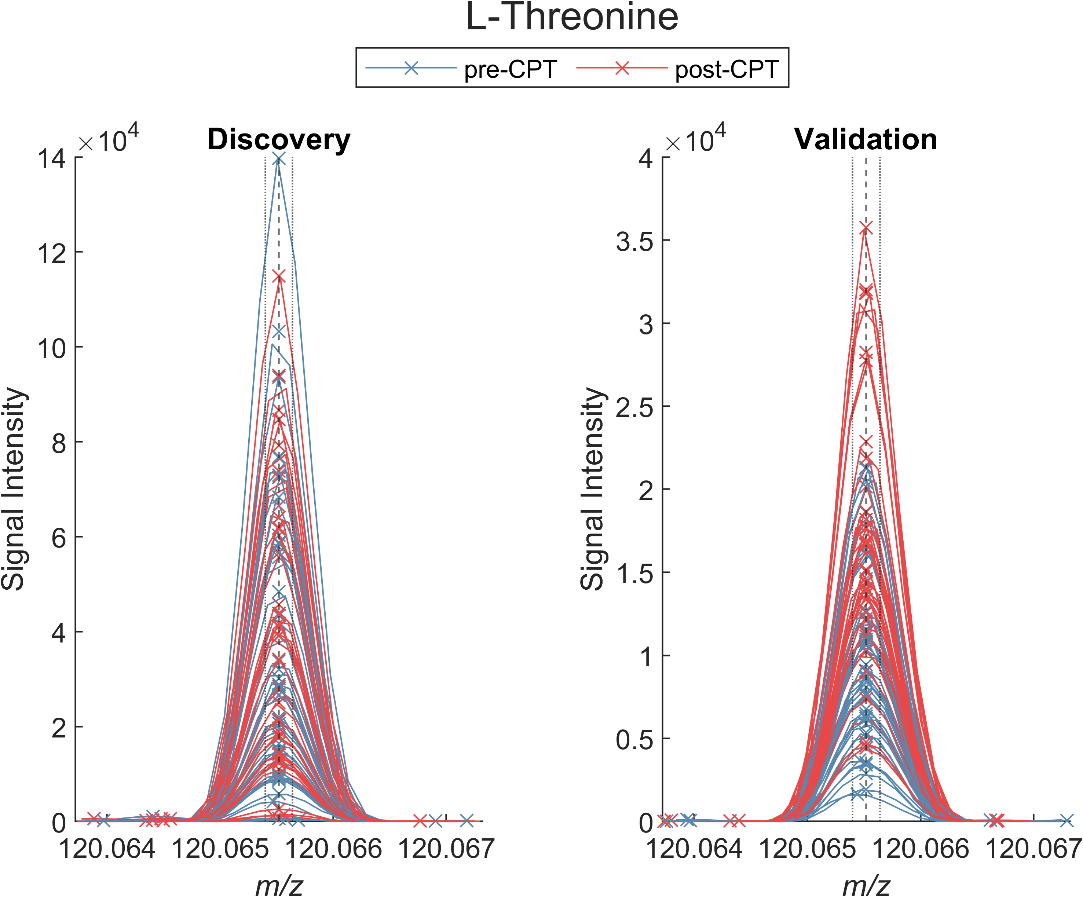

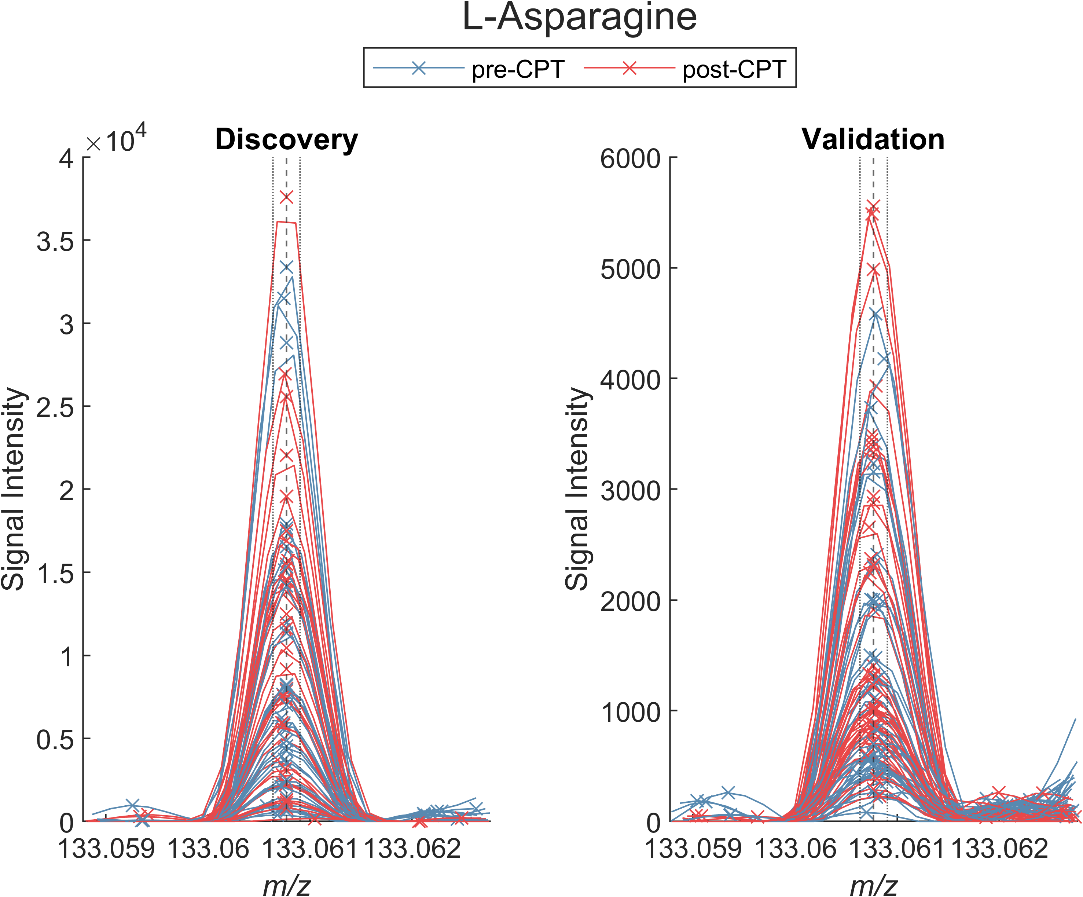
**

**Fig. S2 Further examples of significantly increased exhaled metabolites**

~~
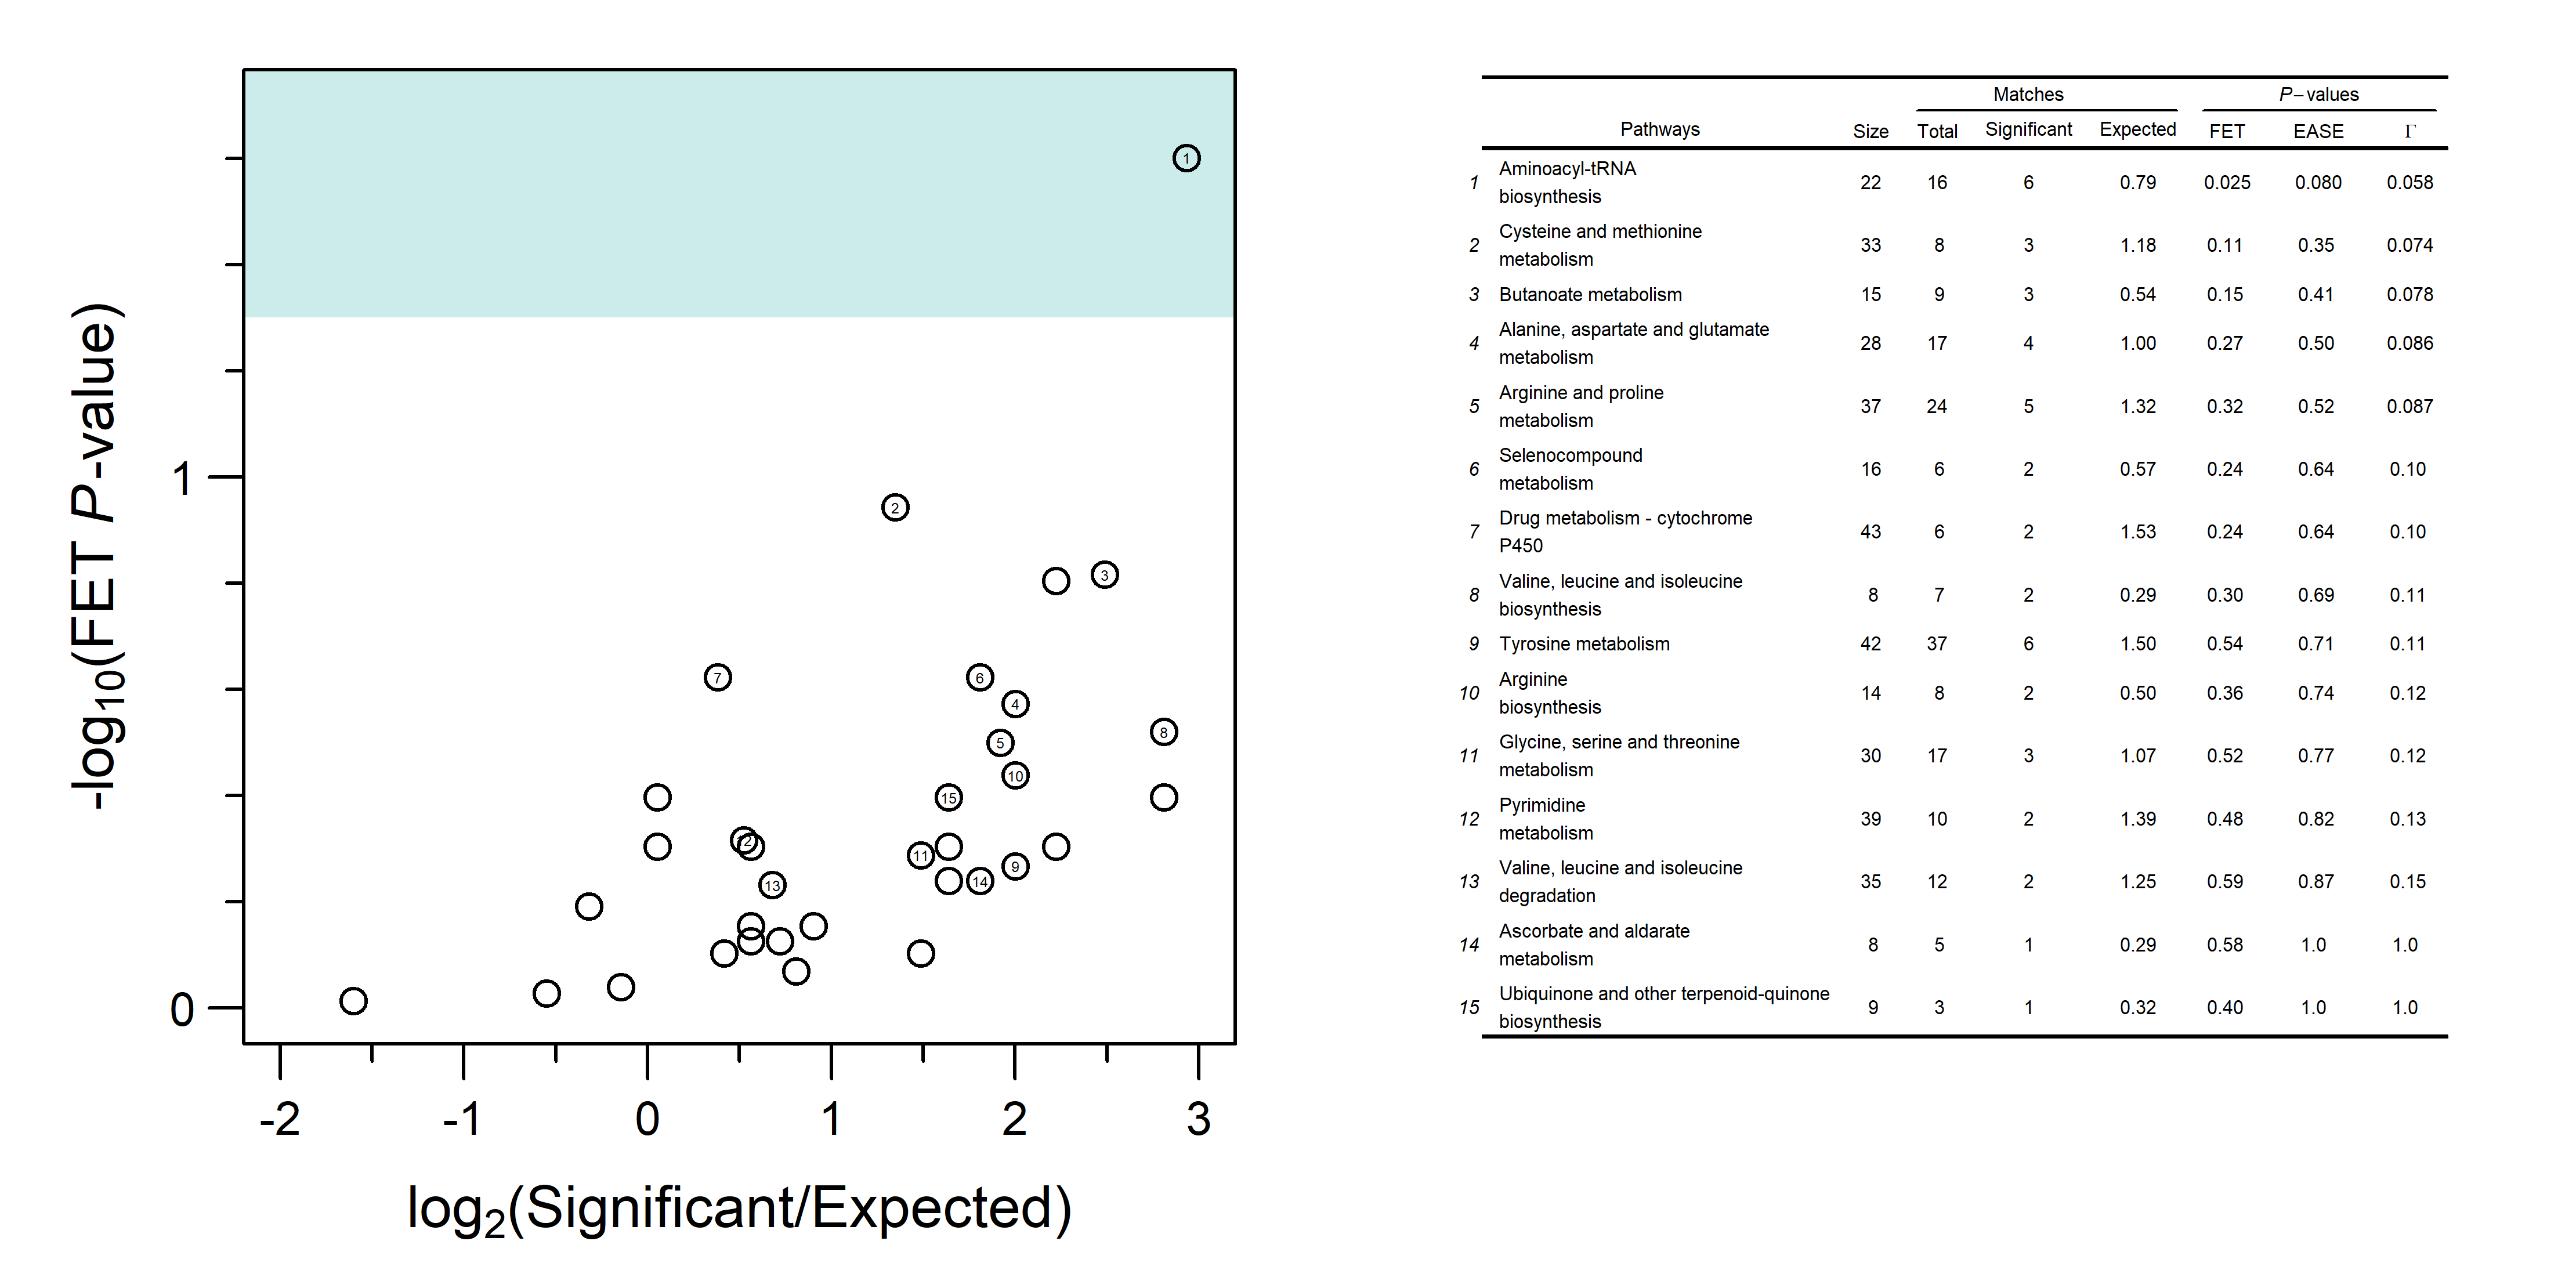
~~

**Fig. S3 Enrichment analysis output**

**Supplementary Table S1 and S2 are included as spreadsheets.**

| Name | ID | Site |
| --- | --- | --- |
| BASEC ID: | 2021-01132 | CH |
| WHO(ICTRP) ID: | NCT04956718 | CH |
| Kofam ID: | SNCTP000004536 | CH |
| DKF CTU Basel ID: | ks21Sinues | CH |
| JNUKY | 2023-0059. | CN |

**Supplementary Table 3**. **Pre-Registrations and ethical committee approval**

**Pilot study "Metabolites in the air we breathe"**

**Inclusion & Exclusion Criteria Checklist**

| Date |  |
| --- | --- |
| Subject number* |  |

**Inclusion Criteria:**

**Yes No**

| Healthy adult person |  |  |
| --- | --- | --- |
| German-speaking or very good knowledge of German |  |  |
| Ability to understand the study and its results |  |  |
| Ability to provide informed consent to participate in the study |  |  |

**Exclusion criteria:**

**Yes No**

| Regular use of medications that can impair the sensation of pain (analgesics, antihistamines, and calcium and potassium channel blockers) |  |  |
| --- | --- | --- |
| Pregnant |  |  |
| Daily smokers (according to the WHO definition: A daily smoker is someone who smokes a tobacco product at least once a day) |  |  |
| Neuropathy (disease of the nervous system) |  |  |
| Chronic/long-lasting pain (> 3 months) |  |  |
| Neuromuscular (diseases that affect muscle function) or psychiatric disorders |  |  |
| Known or suspected heart, kidney, or liver disease |  |  |
| High blood pressure (systolic (mmHg) >130, diastolic (mmHg) >80) |  |  |
| History of Raynaud's phenomenon (symmetrical fading of the fingers or toes due to spasmodic narrowing of the blood vessels) |  |  |
| History of fainting or seizures |  |  |
| History of frostbite |  |  |
| Current medication intake (psychoactive medications, narcotics/strong painkillers, use of analgesics/analgesic or pain-relieving drugs) or psychological and psychiatric treatment |  |  |

Filled by:

_____________________________________________
