# Supplementary material for: Pain induces a rapid characteristic metabolic signature detectable in breath
Source: Research Square preprint supplement (doi:10.21203/rs.3.rs-6048423/v1), 2025-03-04
Supplement: Supplementary file 3 [file f1b6e563be667145985ba4ab.xlsx]

## Sheet: Sheet1
m/z	Polarity	ppm error	Molecular Formula	Chemical Space	DU	Metabolite(s)	Accession	Taxonomy class	KEGG_id	Pathway	uniquePathway(s)	vip_scores_discovery	vip_scores_validation	Log2(FC) [CH]	Log2(FC) [CN]	p [CH]	FDR [CH]	p [CN]	FDR [CN]	Overlapping_sites
70.0287	positive	-0.14778	C3H3NO	CHNO_pos	3	oxirane-2-carbonitrile isoxazole oxazole	HMDB0245087 HMDB0253711 HMDB0255971	Epoxides Azoles Azoles		NA NA NA		1.25245	1.03148	1.70318	1.19548	0.00350032	0.000541916	4.48399e-05	3.2863e-06	FALSE
70.04	positive											0.55962	1.38546	1.08512	1.59112	0.000428738	7.95618e-05	3.81888e-13	1.82255e-13	FALSE
70.0413	positive											0.609695	0.806609	1.50324	1.8545	0.0565931	0.00712207	1.12846e-07	1.21593e-08	TRUE
70.0651	positive	0.0637147	C4H7N	CHN_pos	2	azoline butyronitrile	HMDB0245392 HMDB0249482	Pyrrolines Organonitrogen compounds		NA NA		1.53271	0.909577	1.35609	0.979868	2.97529e-09	2.18816e-09	6.53384e-12	1.94127e-12	FALSE
70.0732	positive	-0.0202705	[13C]C4H8	[13C]CH_pos	2							0.654431	0.53186	0.888808	0.718437	0.000258781	5.02528e-05	6.41132e-06	5.26905e-07	FALSE
71.0127	positive	-0.0828507	C3H2O2	CHO2_pos	3							1.3006	0.71686	1.0326	1.22445	0.0361366	0.00470055	2.11464e-05	1.62086e-06	FALSE
71.0491	positive	-0.0171326	C4H6O	CHO_pos	2	oxirane, ethenyl- methacrolein cyclobutanone 2-ethyloxirene vinyl ether	HMDB0249453 HMDB0249459 HMDB0250640 HMDB0257119 HMDB0259824	Epoxides Organooxygen compounds Organooxygen compounds Oxirenes Organooxygen compounds	C17721	NA NA NA NA NA		0.760894	0.545761	0.673022	0.556015	2.3699e-07	9.51794e-08	2.70552e-07	2.75254e-08	FALSE
71.0604	positive	-0.0656645	C3H6N2	CHN2_pos	2	β aminopropionitrile imidazoline	HMDB0004101 HMDB0246608 HMDB0251155	Organonitrogen compounds Azolines Propargyl-type 1,3-dipolar organic compounds	C05670	NA NA NA		0.655232	1.18957	0.965276	0.984984	0.00358854	0.000554581	0.00264063	0.000158504	FALSE
71.0622	positive											0.743782	0.638641	1.19846	1.28715	0.000579105	0.00010462	3.63183e-08	4.33747e-09	FALSE
71.0685	positive	-0.00570929	[13C]C3H7N	[13C]CHN_pos	2							1.22441	0.867044	1.30735	0.99623	1.07547e-07	4.68983e-08	1.07376e-11	2.96159e-12	FALSE
71.0855	positive	0.0485172	C5H10	CH_pos	1	pentene 2-methyl-1-butene 3-methyl-1-butene	HMDB0243987 HMDB0245210 HMDB0245923	Unsaturated hydrocarbons Unsaturated hydrocarbons Unsaturated hydrocarbons		NA NA NA		0.510198	0.812243	0.550803	0.489323	0.000421127	7.83177e-05	2.44112e-05	1.85993e-06	FALSE
71.9519	positive											1.74631	0.474177	3.05276	0.962642	0.00137027	0.000229553	0.0767237	0.00407292	FALSE
71.9821	positive											1.34638	1.51315	1.58576	1.74927	0.000261771	5.07385e-05	3.04666e-08	3.67665e-09	TRUE
72.008	positive	-0.208449	C2HNO2	CHNO2_pos	3							0.577118	0.663837	0.598467	1.7722	0.339465	0.0378188	0.0017724	0.000108347	FALSE
72.0444	positive	-0.00281543	C3H5NO	CHNO_pos	2	ethylene cyanohydrin 2-azetidinone ethane, isocyanato- 4,5-dihydro-1,2-oxazole oxazoline	HMDB0245904 HMDB0248795 HMDB0252044 HMDB0253712 HMDB0255973	Organonitrogen compounds Carboximidic acids and derivatives Organonitrogen compounds Azolines Azolines		NA NA NA NA NA		2.11584	1.13781	0.911463	1.54832	2.02378e-08	1.11038e-08	1.57136e-12	5.83404e-13	FALSE
72.0525	positive	-0.0844533	[13C]C3H6O	[13C]CHO_pos	2							0.394772	0.257853	0.496692	0.513226	0.0148864	0.0020654	0.00111333	6.93161e-05	FALSE
72.0569	positive											0.917224	0.857891	1.23995	1.79695	0.000138085	2.85128e-05	6.599e-09	9.00829e-10	FALSE
72.0808	positive	-0.0787917	C4H9N	CHN_pos	1	1-ethylaziridine	HMDB0243874	Organonitrogen compounds		NA		2.00411	1.05413	1.27436	2.31807	4.2578e-11	7.96975e-11	2.8138e-12	9.541e-13	FALSE
72.0889	positive	-0.0196957	[13C]C4H10	[13C]CH_pos	1							0.801453	0.452925	0.121565	0.359571	0.575774	0.0617824	0.0437193	0.0023654	FALSE
72.9371	positive											1.26733	1.20715	1.03707	1.69087	5.88102e-05	1.31489e-05	2.26888e-07	2.33378e-08	FALSE
73.0113	positive	-0.272207	[13C]CHNO2	[13C]CHNO2_pos	3							0.484226	0.625276	0.904238	1.2417	0.229173	0.0262652	0.000743615	4.71575e-05	FALSE
73.0284	positive	0.0583162	C3H4O2	CHO2_pos	2	methylglyoxal malonaldehyde 2H-1,3-dioxole β propiolactone	HMDB0001167 HMDB0006112 HMDB0244174 HMDB0249149	Organooxygen compounds Organooxygen compounds Dioxoles Lactones	C00546 C19440 C19297	Glycine, serine and threonine metabolism | Pyruvate metabolism NA NA NA	Glycine, serine and threonine metabolism | Pyruvate metabolism	1.27885	0.63816	0.674787	0.743428	3.54099e-06	1.05153e-06	1.00054e-08	1.32336e-09	FALSE
73.0648	positive	-0.0166534	C4H8O	CHO_pos	1	tetrahydrofuran methyl(ethyl) ketone	HMDB0000246 HMDB0000474	Tetrahydrofurans Organooxygen compounds	C02845	NA NA		0.671247	0.871512	0.846961	0.613707	8.82937e-08	3.93631e-08	3.98773e-05	2.93679e-06	FALSE
74.0236	positive	-0.202694	C2H3NO2	CHNO2_pos	2							1.13694	1.24411	1.04711	1.37315	0.00116421	0.000198367	6.07948e-06	5.01845e-07	FALSE
74.0464	positive											0.120398	0.821689	0.471985	1.23801	0.665876	0.0707478	0.000431795	2.81638e-05	FALSE
74.06	positive	-0.00273775	C3H7NO	CHNO_pos	1	dimethylformamide 1-aminocyclopropan-1-ol propanal, 2-amino- acetone oxime methyl ethanecarboximidate N-methylethanimidic acid oxazolidine	HMDB0001888 HMDB0002134 HMDB0243823 HMDB0245023 HMDB0247913 HMDB0254573 HMDB0255184 HMDB0255972	Carboxylic acids and derivatives Organooxygen compounds Organooxygen compounds Organonitrogen compounds Organonitrogen compounds Carboximidic acids and derivatives Carboximidic acids and derivatives Azolidines	C03134 C01888 C01995	NA Glycine, serine and threonine metabolism NA NA NA NA NA NA	Glycine, serine and threonine metabolism	2.18572	1.25722	1.44486	1.03942	2.20253e-11	5.28697e-11	2.12052e-11	5.33855e-12	FALSE
74.0681	positive	-0.0821233	[13C]C3H8O	[13C]CHO_pos	1							0.496768	0.553682	0.0102965	0.587545	0.975186	0.100203	0.000679179	4.32068e-05	FALSE
74.0964	positive	0.0602005	C4H11N	CHN_pos	0	ethyl dimethylamine	HMDB0255263	Organonitrogen compounds		NA		1.5099	1.02494	1.51567	1.08773	6.15029e-13	1.09961e-11	7.88598e-15	1.05049e-14	FALSE
74.2693	positive											1.46739	0.945542	0.990348	1.24612	0.0140426	0.00195724	2.38798e-07	2.45005e-08	FALSE
74.9528	positive											1.17637	0.860622	0.970405	1.31311	0.167665	0.0196325	1.29581e-08	1.66928e-09	FALSE
74.9754	positive											1.06376	2.02829	1.25861	0.981448	3.4923e-12	1.75798e-11	1.8044e-15	4.60485e-15	FALSE
75.0261	positive											1.4965	1.1569	0.659157	1.05487	0.00159597	0.000263701	3.39355e-08	4.06491e-09	FALSE
75.0441	positive	0.0567286	C3H6O2	CHO2_pos	1	propanoic acid dioxolane dioxolane methoxy(methyl-lambda4-oxidanylidyne)methane (+-)-glycidol acetaldehyde, methoxy-	HMDB0000237 HMDB0244090 HMDB0244173 HMDB0251381 HMDB0252861 HMDB0254543	Carboxylic acids and derivatives Dioxolanes Dioxolanes Organooxygen compounds Epoxides Organooxygen compounds	C00163 C10920	Propanoate metabolism NA NA NA NA NA	Propanoate metabolism	1.04023	0.787752	1.12556	0.843782	2.04861e-08	1.12163e-08	2.36549e-10	4.48391e-11	FALSE
75.0553	positive	0.0108038	C2H6N2O	CHN2O_pos	1	acetohydrazide N'-hydroxyethanimidamide azoxymethane methylharnstoff N-methyl-N-formylhydrazine methoxymethanimidamide	HMDB0060428 HMDB0243752 HMDB0248817 HMDB0254670 HMDB0255179 HMDB0255861	Carboxylic acids and derivatives Organonitrogen compounds Allyl-type 1,3-dipolar organic compounds Organic carbonic acids and derivatives Carboxylic acids and derivatives Carboximidic acids and derivatives	C07447 C16363	NA NA NA NA NA NA		0.990788	0.937286	1.19325	1.06039	2.13326e-10	2.59033e-10	1.77188e-09	2.69327e-10	FALSE
75.0571	positive											1.75891	0.631001	1.93273	1.32433	1.69829e-08	9.40755e-09	8.30368e-05	5.89159e-06	FALSE
75.0634	positive	0.0675164	[13C]C2H7NO	[13C]CHNO_pos	1							2.10375	1.07385	1.49268	1.16706	4.78026e-11	8.60595e-11	2.12003e-10	4.06632e-11	FALSE
75.0663	positive											1.78161	1.38137	4.44045	1.00741	3.55801e-05	8.33237e-06	0.000371206	2.43957e-05	FALSE
75.069	positive											0.239188	0.546557	0.77355	0.687274	0.228222	0.0261677	0.0843888	0.00446418	FALSE
75.0804	positive	-0.151202	C4H10O	CHO_pos	0	butanol 2-butanol	HMDB0004327 HMDB0011469	Organooxygen compounds Organooxygen compounds	C06142	NA NA		0.965382	0.446882	1.62774	0.738873	0.00268635	0.000424259	0.0261826	0.00143679	FALSE
75.0998	positive	-0.00539866	[13C]C3H11N	[13C]CHN_pos	0							1.3287	0.660135	1.52929	1.55282	3.20366e-12	1.62849e-11	0.0208187	0.00115104	TRUE
76.0175	positive											0.681237	1.91329	1.18313	0.968609	4.02532e-10	4.29441e-10	3.43697e-17	5.95188e-16	FALSE
76.0256	positive											1.56542	1.29124	0.763363	1.36729	0.00655209	0.000972849	1.34092e-08	1.72008e-09	FALSE
76.0294	positive											0.943095	1.31019	0.529274	1.81214	0.445304	0.0486484	3.97347e-08	4.69233e-09	FALSE
76.0393	positive	-0.0639727	C2H5NO2	CHNO2_pos	1	glycine acetohydroxamic acid glycolamide hydroxylamino acetic acid methyl carbamate carbamic acid, methyl- nitroethane	HMDB0000123 HMDB0014691 HMDB0245149 HMDB0248304 HMDB0254579 HMDB0254626 HMDB0255646	Carboxylic acids and derivatives Carboxylic acids and derivatives Carboxylic acids and derivatives Carboxylic acids and derivatives Carboxylic acids and derivatives Organic carbonic acids and derivatives Allyl-type 1,3-dipolar organic compounds	C00037 C06808 C19445 C01837	Alanine, aspartate and glutamate metabolism | Arginine and proline metabolism | Glutamate Metabolism | Glutathione metabolism | Glycine, serine and threonine metabolism | Methionine Metabolism | Nitrogen metabolism | Porphyrin Metabolism | Primary bile acid biosynthesis | Purine metabolism NA NA NA NA NA NA	Alanine, aspartate and glutamate metabolism | Arginine and proline metabolism | Glutamate Metabolism | Glutathione metabolism | Glycine, serine and threonine metabolism | Methionine Metabolism | Nitrogen metabolism | Porphyrin Metabolism | Primary bile acid biosynthesis | Purine metabolism	1.20367	1.42254	1.05918	0.930689	1.11173e-10	1.53711e-10	1.37963e-08	1.76414e-09	FALSE
76.0474	positive	-0.00799572	[13C]C2H6O2	[13C]CHO2_pos	1							0.779881	0.501342	1.17227	0.930968	4.3252e-06	1.26484e-06	1.34593e-08	1.72559e-09	FALSE
76.0643	positive											1.54397	0.866701	2.10352	1.4542	2.61274e-07	1.04206e-07	1.09188e-06	1.00614e-07	FALSE
76.0757	positive	-0.00266424	C3H9NO	CHNO_pos	0	trimethylamine-n-oxide ethanamine, 2-methoxy- propanolamine	HMDB0000925 HMDB0245205 HMDB0248330	Organonitrogen compounds Organooxygen compounds Organonitrogen compounds	C01104	NA NA NA		1.02106	0.705146	2.00205	1.78116	7.88116e-06	2.1678e-06	9.36651e-10	1.5261e-10	TRUE
76.5152	positive											0.491426	0.897627	0.991348	1.3299	0.000477753	8.79027e-05	1.13891e-09	1.82257e-10	FALSE
76.5192	positive											0.611697	1.41731	1.33434	1.08576	2.27413e-07	9.1617e-08	4.19583e-15	6.96743e-15	FALSE
77.0053	positive											0.863558	0.318412	0.753809	0.485498	0.434557	0.0476248	0.169022	0.00871131	FALSE
77.0083	positive											0.816377	1.33567	1.23729	1.19805	9.68099e-12	3.17689e-11	3.21049e-12	1.06333e-12	FALSE
77.0128	positive											0.393138	0.546245	0.814533	0.603107	0.253299	0.0288517	0.193281	0.00990896	FALSE
77.0155	positive											0.684019	1.53064	1.54331	1.22271	2.14855e-08	1.16406e-08	5.72007e-08	6.55689e-09	FALSE
77.0196	positive											0.643917	1.16377	0.993605	1.11761	0.00359866	0.000555979	1.22664e-07	1.31588e-08	FALSE
77.0229	positive											1.10118	1.42392	0.0322383	1.87009	0.960422	0.0988424	8.54765e-05	6.05053e-06	FALSE
77.0233	positive											0.718298	0.69204	1.05616	-0.322642	0.0384036	0.00496678	0.0932954	0.00491924	FALSE
77.0381	positive											2.33449	0.899524	1.22236	0.506486	2.42268e-11	5.60773e-11	9.97205e-12	2.78209e-12	FALSE
77.0483	positive											1.16363	1.0013	2.50123	1.82568	0.000244686	4.77124e-05	1.65576e-05	1.2821e-06	TRUE
77.0597	positive	-0.207751	C3H8O2	CHO2_pos	0	R-1,2-propanediol 2-methoxyethanol propane-1,1-diol	HMDB0001881 HMDB0245203 HMDB0256813	Organooxygen compounds Organooxygen compounds Organooxygen compounds	C02912	Pyruvate metabolism NA NA	Pyruvate metabolism	1.18942	0.187056	0.46668	0.313165	0.567924	0.0610411	0.230233	0.0117363	FALSE
78.0092	positive											0.861597	1.16214	2.81311	1.12265	0.00311626	0.000486671	0.00107431	6.69902e-05	FALSE
78.013	positive											1.33372	0.911679	1.49242	2.34698	5.34682e-11	9.33423e-11	5.37935e-08	6.19856e-09	FALSE
78.014	positive											0.730965	1.28626	1.69849	1.06118	0.000227902	4.47592e-05	2.7102e-14	2.47949e-14	FALSE
78.0224	positive											0.660821	0.530509	1.35722	1.22631	4.88964e-06	1.41712e-06	2.01851e-08	2.51864e-09	FALSE
78.0662	positive											0.72064	0.716355	2.76891	1.59438	0.00434841	0.000664094	3.64993e-06	3.11254e-07	TRUE
78.5201	positive											0.398197	1.03695	1.56038	1.46715	0.0097409	0.00140215	0.000173176	1.18234e-05	FALSE
78.9557	positive											0.433398	1.26586	1.22912	1.77938	0.0441828	0.00566476	2.12497e-07	2.19506e-08	FALSE
78.9682	positive											0.850681	1.2372	1.62465	1.16151	0.000520647	9.51533e-05	1.23773e-06	1.13494e-07	FALSE
78.997	positive											1.97319	0.934908	1.12668	0.894896	2.82209e-10	3.2516e-10	3.92475e-12	1.25365e-12	FALSE
79.0059	positive											1.05283	1.11467	2.14432	1.21653	0.000316626	6.04667e-05	0.000691973	4.39861e-05	FALSE
79.0212	positive											0.874803	0.929144	1.23621	1.7915	0.000288778	5.54754e-05	1.08818e-11	2.99795e-12	FALSE
79.0542	positive	0.0435635	C6H6	CH_pos	4	benzene	HMDB0001505	Benzene and substituted derivatives	C01407	NA		1.16808	0.397163	0.473884	0.296047	4.87332e-05	1.10823e-05	0.000660154	4.2107e-05	FALSE
79.9734	positive											0.808055	0.655823	0.811253	1.05251	0.20153	0.0232927	0.000761964	4.8258e-05	FALSE
80.0131	positive	-0.38225	C4HNO	CHNO_pos	5							1.46554	1.44131	0.793887	1.12272	0.00358316	0.000553914	1.60944e-09	2.47901e-10	FALSE
80.0495	positive	-0.0708482	C5H5N	CHN_pos	4							1.51514	1.05564	1.06321	0.941448	1.19554e-09	1.05421e-09	1.9692e-15	4.77417e-15	FALSE
80.0576	positive	-0.144212	[13C]C5H6	[13C]CH_pos	4							0.808548	0.381757	0.309614	-0.487761	0.0124036	0.00174807	0.00740341	0.000426037	FALSE
80.9927	positive											1.90841	0.959084	1.0823	1.05827	8.91284e-10	8.15028e-10	3.51435e-10	6.36789e-11	FALSE
81.0004	positive											1.17903	0.608006	2.60986	1.28402	0.00773	0.0011341	3.62517e-07	3.61981e-08	FALSE
81.0311	positive											1.02421	0.872822	1.58514	1.11032	6.67409e-09	4.20467e-09	1.45442e-15	4.05301e-15	FALSE
81.0335	positive	-0.0149951	C5H4O	CHO_pos	4	tricyclo[1.1.0.0^{2,4}]butane-1-carbaldehyde	HMDB0260405	Organic oxides		NA		1.73146	0.644072	0.986317	0.761611	5.40148e-07	1.97643e-07	0.000108737	7.606e-06	FALSE
81.0447	positive	-0.0574731	C4H4N2	CHN2_pos	4	2-methylideneimidazole pyridazine succinonitrile	HMDB0254636 HMDB0256962 HMDB0258544	Organooxygen compounds Diazines Organonitrogen compounds		NA NA NA		1.19659	0.387975	0.889025	0.730365	3.25795e-10	3.62492e-10	5.94672e-10	1.0153e-10	FALSE
81.0528	positive	-0.00499715	[13C]C4H5N	[13C]CHN_pos	4							1.4759	0.605682	1.07106	1.15292	1.23939e-09	1.08184e-09	7.93217e-09	1.06542e-09	FALSE
81.0686	positive											0.568065	0.475141	1.25901	0.545027	0.015721	0.00216671	0.0028349	0.000169661	FALSE
81.0699	positive	0.0424668	C6H8	CH_pos	3	1,3,5-hexatriene	HMDB0251502	Unsaturated hydrocarbons		NA		1.04461	0.821693	0.817548	0.562889	6.08422e-08	2.87304e-08	7.55257e-09	1.01839e-09	FALSE
81.0711	positive											0.516413	0.59161	1.53102	0.404001	0.0336492	0.00439796	0.0878025	0.00463971	FALSE
82.0175	positive											0.645097	0.417408	-0.137579	0.622734	0.739592	0.0779887	0.00125459	7.77122e-05	FALSE
82.0287	positive	-0.125893	C4H3NO	CHNO_pos	4							1.11053	1.05572	2.11339	1.297	0.0216721	0.00291712	8.30319e-05	5.89297e-06	FALSE
82.0344	positive											1.17141	0.430837	1.37011	0.833346	0.00877979	0.00127692	0.0949491	0.00500535	FALSE
82.0413	positive											1.57881	0.795735	1.4471	1.65869	0.000872646	0.00015173	5.16892e-10	8.93837e-11	FALSE
82.0481	positive	0.00740368	[13C]C3H4N2	[13C]CHN2_pos	4							0.493592	0.32066	-0.137921	0.879643	0.816036	0.0852347	0.000255363	1.71071e-05	FALSE
82.0651	positive	-0.0690865	C5H7N	CHN_pos	3	dihydropyridine 2,3-dihydropyridine 3,4-dihydropyridine 4-pentenenitrile	HMDB0244211 HMDB0245393 HMDB0246030 HMDB0246566	Pyridines and derivatives Pyridines and derivatives Pyridines and derivatives Organonitrogen compounds		NA NA NA NA		1.38297	0.724659	1.01514	0.944182	8.73153e-10	7.99859e-10	1.31289e-10	2.65915e-11	FALSE
82.0732	positive	-0.0172699	[13C]C5H8	[13C]CH_pos	3							0.963989	0.630522	0.794786	0.57373	9.30623e-08	4.12056e-08	2.26436e-08	2.79376e-09	FALSE
83.0127	positive	-0.070727	C4H2O2	CHO2_pos	4							1.03055	0.898087	0.839268	1.39417	0.0160074	0.00220208	2.95592e-06	2.55304e-07	FALSE
83.0216	positive											0.495848	0.782194	1.11725	1.72763	0.00283024	0.000444816	6.69696e-08	7.59412e-09	FALSE
83.0254	positive											0.658644	1.17614	0.917085	0.962846	0.178317	0.0207765	0.00375075	0.000222006	FALSE
83.0491	positive	-0.0146267	C5H6O	CHO_pos	3	cyclopentenone	HMDB0244222 HMDB0245092	Organooxygen compounds Organooxygen compounds		NA NA		1.80409	1.26445	0.822579	0.755014	1.97733e-07	8.05992e-08	3.44461e-10	6.25556e-11	FALSE
83.0604	positive	-0.0560613	C4H6N2	CHN2_pos	3	fomepizole 1-methylimidazole 1H-pyrrol-2-amine 1H-imidazole, 2-methyl- 2,5-dihydropyrimidine 4-methylimidazole 1,2-dihydropyridazine 1,2-dihydropyrimidine	HMDB0015344 HMDB0243940 HMDB0245028 HMDB0245233 HMDB0245497 HMDB0246511 HMDB0251325 HMDB0251326	Azoles Azoles Pyrroles Azoles Diazines Azoles Diazines Diazines	C07837 C19261 C19262	NA NA NA NA NA NA NA NA		1.46123	1.02677	1.57726	2.424	1.13871e-11	3.51432e-11	1.03877e-06	9.60859e-08	TRUE
83.0766	positive											0.333898	0.47871	0.186341	0.721558	0.812446	0.0849283	0.00630572	0.000365734	FALSE
83.0855	positive	-0.0804111	C6H10	CH_pos	2	1,5-hexadiene cyclohexene	HMDB0244236 HMDB0250655	Unsaturated hydrocarbons Unsaturated hydrocarbons		NA NA		0.619306	0.63884	0.42282	0.254407	0.00273472	0.000431373	0.0292077	0.00159846	FALSE
83.9757	positive											1.31309	1.18142	1.79662	1.4546	0.0144595	0.00201209	2.47693e-05	1.88484e-06	FALSE
84.015	positive											0.398888	1.01492	1.00352	1.11934	0.00170576	0.0002805	1.83998e-07	1.92362e-08	FALSE
84.0444	positive	-0.00240856	C4H5NO	CHNO_pos	3	2H-1,2-oxazine	HMDB0255970	Oxazines		NA		1.86796	1.224	1.09513	1.37724	1.07469e-09	9.62374e-10	3.06003e-13	1.54881e-13	FALSE
84.0525	positive	0.0481665	[13C]C4H6O	[13C]CHO_pos	3							1.11122	0.731248	0.736105	0.95233	0.00014572	2.99343e-05	1.92172e-05	1.48e-06	FALSE
84.057	positive											1.23884	0.917132	1.49522	1.47829	0.000304703	5.83402e-05	6.12056e-11	1.36637e-11	FALSE
84.0808	positive	0.0529651	C5H9N	CHN_pos	2	1,2,3,4-tetrahydropyridine 3-butyn-2-amine, 2-methyl- 1-isocyano-2-methylpropane tert-butyl isocyanide	HMDB0243998 HMDB0244121 HMDB0245752 HMDB0253611 HMDB0258845	NA Pyridines and derivatives NA Organonitrogen compounds		NA NA NA NA NA		1.62667	0.7191	1.3388	1.28441	7.7764e-10	7.22576e-10	1.67346e-10	3.28515e-11	FALSE
84.0889	positive	-0.0168509	[13C]C5H10	[13C]CH_pos	2							0.316953	0.254927	0.19628	-0.0111304	0.210495	0.0242478	0.946988	0.0455083	FALSE
84.9597	positive											1.45283	1.79808	1.17436	1.14788	7.41331e-10	6.96325e-10	7.95332e-15	1.05367e-14	FALSE
85.0228	positive											0.685943	1.93184	1.21373	1.02028	3.19456e-10	3.5697e-10	5.37272e-16	1.88778e-15	FALSE
85.0238	positive											1.00236	0.807823	1.76245	0.545681	0.0011591	0.000197561	0.0444922	0.00240347	FALSE
85.0284	positive	0.0499874	C4H4O2	CHO2_pos	3	1,4-dioxin 3-hydroxycyclobut-2-en-1-one 2-butene-1,4-dial diketene	HMDB0244218 HMDB0245898 HMDB0247804 HMDB0251360	Dioxins Vinylogous acids Organooxygen compounds Lactones		NA NA NA NA		0.620035	0.561098	0.473105	0.483171	0.00155829	0.000257886	2.23149e-05	1.70503e-06	FALSE
85.0396	positive	0.00952014	C3H4N2O	CHN2O_pos	3	imidazol-4-one 1,2-dihydropyrazol-3-one acetamide, 2-cyano- N-cyanoacetamide	HMDB0004363 HMDB0244898 HMDB0245084 HMDB0255063	Carboxylic acids and derivatives Azolines Carboxylic acids and derivatives Carboxylic acids and derivatives	C06195	NA NA NA NA		1.12199	1.44971	1.43888	1.78134	1.11481e-10	1.53727e-10	4.61006e-15	7.35309e-15	FALSE
85.0478	positive	0.178485	[13C]C3H5NO	[13C]CHNO_pos	3							0.983836	1.05315	1.81159	2.06879	0.00115447	0.000196837	1.78182e-09	2.705e-10	TRUE
85.0603	positive											0.957067	0.881989	2.25314	1.64961	0.00175383	0.000287403	3.14343e-10	5.78663e-11	TRUE
85.0648	positive	-0.0142759	C5H8O	CHO_pos	2	2-methylideneoxolane	HMDB0245228	Oxolanes		NA		1.49888	1.25087	0.789282	0.785235	1.27934e-08	7.37843e-09	1.34045e-12	5.11781e-13	FALSE
85.076	positive	-0.0547171	C4H8N2	CHN2_pos	2	but-2-yne-1,4-diamine 1,2,3,4-tetrahydropyrimidine	HMDB0244206 HMDB0258907	Organonitrogen compounds Diazines		NA NA		0.932667	0.684347	1.36305	1.04332	3.24301e-05	7.67442e-06	6.58701e-06	5.40977e-07	FALSE
85.0841	positive	-0.00475755	[13C]C4H9N	[13C]CHN_pos	2							1.01612	0.723902	1.25747	1.82809	0.0830698	0.0101943	8.03538e-08	8.91583e-09	FALSE
85.1012	positive	0.040431	C6H12	CH_pos	1	4-methyl-1-pentene	HMDB0246499	Unsaturated hydrocarbons		NA		0.446762	0.764881	0.424956	0.444239	0.00360649	0.000557022	8.3263e-05	5.90591e-06	FALSE
85.5245	positive											0.744977	1.61064	1.53006	1.12534	2.48581e-08	1.32872e-08	7.58785e-14	5.36329e-14	FALSE
85.9631	positive											1.52549	1.13191	1.26693	1.63167	1.72508e-08	9.54575e-09	5.11251e-12	1.57096e-12	FALSE
86.0059	positive											0.768131	0.857189	1.09177	0.973523	0.000106972	2.25739e-05	8.67611e-09	1.16084e-09	FALSE
86.0208	positive											0.951146	1.47692	1.36424	1.47252	2.72583e-07	1.08051e-07	2.80434e-10	5.21787e-11	FALSE
86.0237	positive	-0.0564597	C3H3NO2	CHNO2_pos	3	cyanoacetic acid	HMDB0250607	Carboxylic acids and derivatives		NA		1.31345	1.37034	1.2599	0.934837	7.80245e-08	3.55178e-08	1.19237e-09	1.90059e-10	FALSE
86.0249	positive											0.889462	1.34753	1.31776	1.15352	7.77479e-08	3.54542e-08	6.89024e-12	2.03469e-12	FALSE
86.0318	positive	-0.00705679	[13C]C3H4O2	[13C]CHO2_pos	3							0.270043	0.216116	-0.27288	0.39873	0.277094	0.0313965	0.0673313	0.00358688	FALSE
86.0349	positive											0.916033	1.44787	1.76218	1.17932	0.000221713	4.36264e-05	0.00312426	0.000186243	FALSE
86.06	positive	-0.00235148	C4H7NO	CHNO_pos	2	pyrrolidone 2-methyl-2-oxazoline methacrylamide N-ethenylacetamide	HMDB0002039 HMDB0245215 HMDB0254513 HMDB0255246	Pyrrolidines Azolines Carboxylic acids and derivatives Carboxylic acids and derivatives	C11118	NA NA NA NA		0.725995	1.70851	0.712603	1.19699	0.00164051	0.000270802	1.10634e-16	7.88888e-16	FALSE
86.0681	positive	-0.0705377	[13C]C4H8O	[13C]CHO_pos	2							1.06311	0.70922	0.758656	0.8057	2.97403e-08	1.54354e-08	1.83911e-08	2.31384e-09	FALSE
86.0964	positive	0.0517105	C5H11N	CHN_pos	1	1-methyl-pyrrolidine cyclopentanamine	HMDB0243946 HMDB0250671	Pyrrolidines Organonitrogen compounds		NA NA		1.525	1.13057	1.58352	1.87289	1.18852e-11	3.60371e-11	9.11762e-14	6.07277e-14	TRUE
86.1045	positive	-0.133964	[13C]C5H12	[13C]CH_pos	1							1.15015	0.354696	0.0553632	0.267518	0.86666	0.0900147	0.124691	0.00651093	FALSE
86.9557	positive											1.48183	1.15467	1.28136	2.17896	2.31932e-08	1.24487e-08	3.61126e-06	3.08173e-07	FALSE
86.9626	positive											0.925065	1.27719	0.982572	1.10243	1.67709e-07	7.00123e-08	0.00018498	1.25903e-05	FALSE
86.9639	positive											1.21384	0.929417	1.12193	1.78531	8.82638e-07	3.05499e-07	2.58359e-05	1.95986e-06	FALSE
86.9927	positive											1.71207	1.48356	1.1305	1.31996	1.45305e-09	1.22902e-09	2.50804e-12	8.71138e-13	FALSE
87.0077	positive	-0.00465114	C3H2O3	CHO3_pos	3	2-oxopropanedial	HMDB0256003	Organooxygen compounds		NA		0.904053	0.824606	1.07624	1.26006	0.00173966	0.000285352	2.19692e-06	1.93682e-07	FALSE
87.0193	positive											1.27978	1.55693	1.44125	1.17548	9.29668e-10	8.45653e-10	1.39598e-13	8.61179e-14	FALSE
87.0278	positive											0.704397	0.604838	1.2887	1.13463	9.43871e-09	5.63161e-09	3.47195e-12	1.13596e-12	FALSE
87.0441	positive	0.0488163	C4H6O2	CHO2_pos	2	butyrolactone butynediol 2,2'-bioxirane acetoacetaldehyde formic acid, 2-propenyl ester cyclopropanecarboxylic acid 2-oxobutanal methacrylic acid 2-methylpropanedial butanedione	HMDB0000549 HMDB0245045 HMDB0245351 HMDB0247909 HMDB0248166 HMDB0250675 HMDB0252077 HMDB0254514 HMDB0254654 HMDB0258537	Lactones Organooxygen compounds Epoxides Organooxygen compounds Carboxylic acids and derivatives Carboxylic acids and derivatives Organooxygen compounds Carboxylic acids and derivatives Organooxygen compounds Organooxygen compounds	C01770 C02497 C16267 C16835	NA NA NA NA NA NA NA NA NA NA		0.870504	0.938259	0.622242	0.652166	1.03847e-05	2.77687e-06	4.02236e-09	5.71621e-10	FALSE
87.0553	positive	0.00929714	C3H6N2O	CHN2O_pos	2	4,5-dihydro-1H-imidazol-2-ol 3-aminoazetidin-2-one imidazolidin-4-one	HMDB0245173 HMDB0245813 HMDB0246471	Azolines Lactams Carboxylic acids and derivatives		NA NA NA		1.01823	1.28058	1.56271	2.24887	7.17944e-07	2.55313e-07	5.95566e-10	1.01611e-10	TRUE
87.0634	positive	-0.0581016	[13C]C3H7NO	[13C]CHNO_pos	2							0.52647	1.05382	0.720365	2.27262	0.00720302	0.0010628	6.48728e-10	1.09525e-10	FALSE
87.0804	positive	-0.0139416	C5H10O	CHO_pos	1	isovaleraldehyde 2-methyltetrahydrofuran 3-methylbut-1-en-1-ol tetrahydropyran	HMDB0006478 HMDB0245240 HMDB0253669 HMDB0258904	Organooxygen compounds Tetrahydrofurans Organooxygen compounds Oxanes	C07329	NA NA NA NA		0.791209	1.0513	1.02716	0.672712	7.81579e-09	4.78442e-09	1.13948e-08	1.48445e-09	FALSE
87.0818	positive											0.652436	0.683458	1.7372	0.85788	0.0361128	0.00469982	0.00951715	0.000542014	FALSE
87.5255	positive											0.539007	1.42885	1.34116	1.22995	0.00273977	0.000432038	4.65846e-15	7.38173e-15	FALSE
87.5295	positive											0.591891	0.462248	2.04511	1.00583	0.00650071	0.000966049	0.000920599	5.77767e-05	FALSE
87.9559	positive											1.32217	1.34839	1.9122	1.45263	0.002484	0.000394827	0.00445341	0.000261871	FALSE
87.9935	positive											1.10913	1.03276	1.23505	2.39885	3.21275e-09	2.32975e-09	4.23544e-08	4.97262e-09	FALSE
88.0215	positive											1.09578	0.675579	0.890235	0.999197	3.44814e-05	8.0897e-06	0.000501188	3.24196e-05	FALSE
88.0393	positive	-0.0551521	C3H5NO2	CHNO2_pos	2	2-iminiopropanoate oxazolidinone oxirane-2-carboximidic acid hydroxyiminoacetone vinyl carbamate	HMDB0245175 HMDB0245282 HMDB0252860 HMDB0253665 HMDB0259822	Organonitrogen compounds Azolines Epoxides Organonitrogen compounds Carboxylic acids and derivatives	C06695	NA NA NA NA NA		1.20964	1.21956	0.960781	1.33865	5.59549e-09	3.6265e-09	4.93921e-11	1.14045e-11	FALSE
88.0444	positive											0.796668	0.562314	1.37655	1.15038	4.16024e-10	4.39315e-10	3.01117e-13	1.52727e-13	FALSE
88.0474	positive	-0.00689337	[13C]C3H6O2	[13C]CHO2_pos	2							0.500273	0.438091	0.423439	0.628074	0.00262001	0.000414666	2.32016e-05	1.77055e-06	FALSE
88.0519	positive											0.767765	0.78135	1.29959	1.56175	0.00234195	0.000374429	1.67687e-09	2.57631e-10	FALSE
88.0757	positive	-0.00229704	C4H9NO	CHNO_pos	1	2-methylpropanimidic acid dimethylacetamide	HMDB0253614 HMDB0255258	Carboxylic acids and derivatives Carboxylic acids and derivatives	C20339	NA NA		1.82303	1.08436	1.24632	0.910043	5.19617e-11	9.13274e-11	1.29864e-12	4.99753e-13	FALSE
88.0838	positive	0.0459366	[13C]C4H10O	[13C]CHO_pos	1							0.657895	0.812623	1.05188	0.660279	3.98423e-07	1.51339e-07	6.391e-07	6.12186e-08	FALSE
88.1121	positive	0.0505139	C5H13N	CHN_pos	0	amylamine	HMDB0248371	Organonitrogen compounds		NA		1.16875	0.723842	1.55322	1.14898	2.26422e-12	1.27606e-11	1.43349e-06	1.29969e-07	FALSE
88.5448	positive											0.644423	0.489842	1.86072	0.996985	0.000782463	0.000137805	9.13331e-05	6.43316e-06	FALSE
88.9526	positive											1.50901	1.40411	1.18358	1.5207	6.91277e-10	6.64971e-10	1.95802e-11	4.96034e-12	FALSE
88.9903	positive											1.31506	0.944741	1.30617	1.73596	4.22906e-08	2.07644e-08	0.000123492	8.57868e-06	FALSE
89.0233	positive	-0.00454463	C3H4O3	CHO3_pos	2	pyruvic acid ethylene carbonate	HMDB0000243 HMDB0252067	Keto acids and derivatives Organic carbonic acids and derivatives	C00022 C20363	Alanine, aspartate and glutamate metabolism | Amino Sugar Metabolism | Citric Acid Cycle | Cysteine Metabolism | Glutamate Metabolism | Glycine, serine and threonine metabolism | Glycolysis / Gluconeogenesis | Glycolysis / Gluconeogenesis | Nitrogen metabolism | Pyruvate metabolism | Urea Cycle NA	Alanine, aspartate and glutamate metabolism | Amino Sugar Metabolism | Citric Acid Cycle | Cysteine Metabolism | Glutamate Metabolism | Glycine, serine and threonine metabolism | Glycolysis / Gluconeogenesis | Glycolysis / Gluconeogenesis | Nitrogen metabolism | Pyruvate metabolism | Urea Cycle	0.551292	0.624636	0.609825	0.983962	0.00550961	0.000826583	2.67806e-05	2.02644e-06	FALSE
89.0345	positive	-0.0431684	C2H4N2O2	CHN2O2_pos	2	ethanedial, dioxime	HMDB0252890	Organonitrogen compounds		NA		0.871208	0.614207	1.02247	1.05655	4.54098e-06	1.32421e-06	0.000891166	5.6031e-05	FALSE
89.0419	positive											0.698971	0.551641	1.09394	1.02921	6.32841e-08	2.9748e-08	2.19335e-11	5.48206e-12	FALSE
89.0432	positive											0.732706	1.15816	1.81189	1.13234	8.97196e-05	1.93183e-05	0.000130839	9.07347e-06	FALSE
89.0597	positive	0.0476989	C4H8O2	CHO2_pos	1	butyric acid isobutyric acid acetoin 1,3-dioxane dioxane 3-butene-1,2-diol	HMDB0000039 HMDB0001873 HMDB0003243 HMDB0244172 HMDB0244216 HMDB0245828	Fatty Acyls Carboxylic acids and derivatives Organooxygen compounds Dioxanes Dioxanes Organooxygen compounds	C00246 C02632 C00466 C14440	Butyrate Metabolism NA NA NA NA NA	Butyrate Metabolism	0.751335	0.44086	0.652146	0.461538	4.28032e-05	9.84605e-06	3.0601e-05	2.29051e-06	FALSE
89.0709	positive	0.00908434	C3H8N2O	CHN2O_pos	1	1,1-dimethylurea N-ethylcarbamimidic acid 2-aminopropanamide	HMDB0244027 HMDB0252088 HMDB0253863	Organic carbonic acids and derivatives Organic carbonic acids and derivatives Carboxylic acids and derivatives		NA NA NA		0.810633	0.830002	1.20695	1.43204	2.60364e-10	3.04731e-10	1.01786e-08	1.34188e-09	FALSE
89.079	positive	-0.0567719	[13C]C3H9NO	[13C]CHNO_pos	1							1.44552	0.830435	1.30549	1.13785	3.12976e-10	3.5277e-10	4.86152e-09	6.77376e-10	FALSE
89.0847	positive											0.578539	1.11198	1.07507	1.18422	0.193553	0.0224257	0.000415328	2.71482e-05	FALSE
89.9399	positive											1.61185	0.994303	1.52875	1.15248	0.00206759	0.000333963	5.93418e-07	5.7159e-08	FALSE
89.9625	positive											0.978678	1.16845	1.36062	2.14147	1.30297e-08	7.48975e-09	5.22778e-07	5.09213e-08	FALSE
89.9637	positive											0.814641	0.933052	1.76832	2.35346	5.33779e-07	1.95727e-07	9.11238e-11	1.92945e-11	TRUE
90.0186	positive											0.538685	0.700352	0.996038	1.33685	0.00987752	0.00142063	4.49469e-05	3.29314e-06	FALSE
90.0332	positive											0.338217	0.836156	0.800253	1.2241	0.176791	0.020608	0.000142692	9.84475e-06	FALSE
90.0453	positive											0.475097	0.497492	0.718889	1.31772	0.0843485	0.0103438	7.91927e-07	7.46486e-08	FALSE
90.055	positive	0.0583957	C3H7NO2	CHNO2_pos	1	β alanine L-alanine sarcosine D-alanine alanine 1-nitropropane β-nitropropane 2-amino-3-hydroxypropanal carbamic acid, dimethyl- propanamide, 2-hydroxy- methyl 2-aminoacetate HMMF	HMDB0000056 HMDB0000161 HMDB0000271 HMDB0001310 HMDB0062251 HMDB0243966 HMDB0245265 HMDB0247847 HMDB0251396 HMDB0253942 HMDB0254591 HMDB0255155	Carboxylic acids and derivatives Carboxylic acids and derivatives Carboxylic acids and derivatives Carboxylic acids and derivatives Carboxylic acids and derivatives Allyl-type 1,3-dipolar organic compounds Allyl-type 1,3-dipolar organic compounds Organooxygen compounds Organic carbonic acids and derivatives Organooxygen compounds Carboxylic acids and derivatives Carboxylic acids and derivatives	C00099 C00041 C00213 C00133 C01401 C02116 C11488	Aspartate Metabolism | beta-Alanine metabolism | Histidine metabolism | Propanoate metabolism | Pyrimidine metabolism Alanine, aspartate and glutamate metabolism | Glutamate Metabolism | Glutathione metabolism | Glycine, serine and threonine metabolism | Selenocompound metabolism | Tryptophan metabolism | Urea Cycle Glycine, serine and threonine metabolism | Methionine Metabolism NA NA NA NA NA N…	Alanine, aspartate and glutamate metabolism | Glutamate Metabolism | Glutathione metabolism | Glycine, serine and threonine metabolism | Selenocompound metabolism | Tryptophan metabolism | Urea Cycle | Aspartate Metabolism | beta-Alanine metabolism | Histidine metabolism | Propanoate metabolism | Pyrimidine metabolism | Glycine, serine and threonine metabolism | Methionine Metabolism	1.35015	1.46542	0.933665	1.16856	2.92721e-09	2.162e-09	1.96393e-15	4.80948e-15	FALSE
90.0631	positive	-0.00673735	[13C]C3H8O2	[13C]CHO2_pos	1							0.88819	0.222145	0.558123	0.368408	0.0010631	0.000182276	0.00654944	0.000379326	FALSE
90.0913	positive	-0.00224507	C4H11NO	CHNO_pos	0	ethanol, 2-(ethylamino)- 2-amino-2-methyl-1-propanol 2-amino-1-butanol 3-methoxypropylamine 4-aminobutan-1-ol 1-(dimethylamino)ethanol N,N-dimethylethanamine oxide O-butylhydroxylamine	HMDB0244944 HMDB0244974 HMDB0245012 HMDB0245920 HMDB0246336 HMDB0251392 HMDB0251399 HMDB0255843	Organonitrogen compounds Organonitrogen compounds Organonitrogen compounds Organooxygen compounds Organonitrogen compounds Organonitrogen compounds Organonitrogen compounds Organooxygen compounds		NA NA NA NA NA NA NA NA		1.19798	0.891286	1.46979	1.41378	2.36514e-12	1.29084e-11	4.38378e-12	1.38207e-12	FALSE
90.9477	positive											2.41207	1.6888	1.18738	0.981468	1.79813e-12	1.08408e-11	3.2614e-14	2.82393e-14	FALSE
90.9767	positive											0.601776	0.341586	1.82273	1.6557	0.00632106	0.000942323	0.000557583	3.58856e-05	TRUE
91.0025	positive											0.597508	0.594182	1.35074	1.44876	0.0184351	0.0025114	0.0131973	0.000742016	FALSE
91.0156	positive											0.263361	0.7504	0.86999	1.01011	0.31445	0.0352974	0.00119414	7.41002e-05	FALSE
91.0212	positive											0.589156	0.708834	1.24761	1.6088	6.33374e-05	1.40461e-05	1.48395e-06	1.34443e-07	FALSE
91.0219	positive											0.371013	0.583769	0.701749	1.15081	0.157261	0.0185104	0.000136819	9.4611e-06	FALSE
91.0228	positive											0.484234	0.233359	0.761961	0.549264	5.67763e-05	1.27437e-05	0.000461355	2.9979e-05	FALSE
91.0377	positive											0.718728	0.569833	1.36699	1.50108	0.000550287	9.98662e-05	6.62907e-08	7.52065e-09	FALSE
91.039	positive	-0.00444288	C3H6O3	CHO3_pos	1	(α)-lactate hydroxypropionic acid (+/-)-glyceraldehyde D-lactic acid 1,2,4-trioxane trioxane methyl ethaneperoxoate	HMDB0000190 HMDB0000700 HMDB0001051 HMDB0001311 HMDB0244144 HMDB0244188 HMDB0244711	Hydroxy acids and derivatives Hydroxy acids and derivatives Organooxygen compounds Hydroxy acids and derivatives Trioxanes Trioxanes Carboxylic acids and derivatives	C00186 C01013 C02154 C00256	Glycolysis / Gluconeogenesis | Pyruvate metabolism Propanoate metabolism Fructose and mannose metabolism | Glycerolipid Metabolism Pyruvate metabolism NA NA NA	Fructose and mannose metabolism | Glycerolipid Metabolism | Glycolysis / Gluconeogenesis | Pyruvate metabolism | Propanoate metabolism | Pyruvate metabolism	0.64121	0.685722	0.737188	0.549568	0.000244618	4.77169e-05	0.00248732	0.000149709	FALSE
91.0542	positive	0.0377581	C7H6	CH_pos	5							1.3904	1.36321	0.590192	0.596482	4.09596e-05	9.45551e-06	2.62778e-07	2.68246e-08	FALSE
91.0574	positive											0.952049	0.46168	1.10917	0.785129	5.17168e-08	2.48513e-08	4.52308e-07	4.45766e-08	FALSE
91.0639	positive											0.699922	0.137138	0.95113	0.234649	0.0868992	0.010639	0.420951	0.0209733	FALSE
91.0753	positive	-0.175423	C4H10O2	CHO2_pos	0	2,3-butanediol 1-methoxy-2-propanol 1,2-dimethoxyethane 1,4-butanediol tert-butyl hydroperoxide	HMDB0003156 HMDB0243915 HMDB0244080 HMDB0244201 HMDB0255095 HMDB0258844	Organooxygen compounds NA Organooxygen compounds Organooxygen compounds Organic hydroperoxides Organic hydroperoxides		NA NA NA NA NA NA		1.56967	0.576198	0.499973	1.07665	0.168043	0.0196723	0.0003991	2.6158e-05	FALSE
91.0947	positive	0.0555016	[13C]C3H11NO	[13C]CHNO_pos	0							0.697137	1.02417	2.33419	1.95587	0.00010439	2.21189e-05	4.57177e-06	3.83923e-07	TRUE
91.9481	positive											0.928625	1.13142	1.30243	1.62101	0.0271902	0.00360834	0.000488685	3.167e-05	FALSE
92.0228	positive											0.304775	0.668777	0.930412	1.1367	0.32617	0.0365024	0.000113502	7.91419e-06	FALSE
92.0306	positive											0.511138	0.987802	0.968147	0.894829	0.000944715	0.000163166	8.66961e-05	6.13149e-06	FALSE
92.0342	positive											0.564479	1.13666	1.52872	1.02659	0.000869713	0.000151321	4.47842e-05	3.28419e-06	FALSE
92.0569	positive											0.458492	0.648054	1.57263	0.925904	0.0974716	0.0118606	0.00125281	7.76214e-05	FALSE
92.0576	positive	-0.125206	[13C]C6H6	[13C]CH_pos	5							1.09257	0.261889	0.505619	0.420446	0.000316051	6.03792e-05	0.115558	0.00605227	FALSE
92.0608	positive											0.482784	0.629662	1.49995	1.02576	0.0874082	0.0106963	0.000376912	2.47439e-05	FALSE
92.0706	positive	-0.162524	C3H9NO2	CHNO2_pos	0	2-aminopropane-1,3-diol	HMDB0244971	Organonitrogen compounds		NA		1.03496	0.771843	1.289	1.08391	0.0467234	0.00595808	0.000193635	1.31499e-05	FALSE
92.7738	positive											1.15281	0.948071	0.989429	2.09219	2.38821e-06	7.35747e-07	2.02429e-06	1.79244e-07	FALSE
92.9497	positive											1.09496	0.956178	1.68091	1.73543	0.00470735	0.000714075	3.968e-05	2.92404e-06	TRUE
92.9859	positive											0.960229	1.78877	1.36971	1.01586	1.4737e-08	8.32348e-09	3.11498e-14	2.74618e-14	FALSE
93.0203	positive											0.306271	1.24599	0.559638	1.24826	0.0221102	0.00297069	1.94048e-07	2.01911e-08	FALSE
93.0366	positive											0.65532	0.827057	0.580465	0.730524	0.000575179	0.000103947	1.12789e-07	1.2164e-08	FALSE
93.0447	positive	-0.267283	C5H4N2	CHN2_pos	5							0.980257	0.891027	1.35748	1.1077	0.000788956	0.000138619	5.08088e-05	3.70137e-06	FALSE
93.0546	positive	0.104294	C3H8O3	CHO3_pos	0	glycerol	HMDB0000131	Organooxygen compounds	C00116	Galactose Metabolism | Glycerolipid Metabolism	Galactose Metabolism | Glycerolipid Metabolism	1.14212	0.855939	0.80899	0.521565	8.91892e-05	1.92121e-05	0.000224101	1.51004e-05	FALSE
93.0573	positive											0.975055	1.07401	1.0281	1.24752	1.72194e-07	7.1539e-08	0.00338325	0.000201138	FALSE
93.0683	positive											0.995584	0.761054	1.11794	0.673124	0.0776242	0.00956674	0.00488103	0.000286182	FALSE
93.0699	positive	0.0369314	C7H8	CH_pos	4	toluene	HMDB0034168	Benzene and substituted derivatives	C01455	NA		1.31961	1.11386	0.622818	0.521375	4.99486e-06	1.44438e-06	4.77744e-08	5.54452e-09	FALSE
94.0281	positive											0.685873	1.87702	1.35848	1.04779	7.69635e-09	4.72245e-09	1.39469e-14	1.56542e-14	FALSE
94.0362	positive											0.103534	0.974964	0.140673	1.05812	0.560507	0.0602939	6.06793e-07	5.83777e-08	FALSE
94.04	positive	0.283771	C4H3N3	CHN3_pos	5							0.27085	1.1713	0.493829	1.32725	0.16987	0.0198592	1.3038e-06	1.19011e-07	FALSE
94.0413	positive											1.65843	0.739072	1.01526	1.28346	1.55908e-05	3.98012e-06	2.03389e-08	2.53392e-09	FALSE
94.058	positive	0.0515848	[13C]C2H8O3	[13C]CHO3_pos	0							0.8888	0.683056	1.09027	0.552247	0.167056	0.01957	0.0251069	0.00138057	FALSE
94.0651	positive	0.0472824	C6H7N	CHN_pos	4	azepine	HMDB0244871	Azepines		NA		1.73665	1.32162	0.803912	0.687114	3.702e-09	2.62219e-09	2.10941e-11	5.3161e-12	FALSE
94.0732	positive	-0.0150431	[13C]C6H8	[13C]CH_pos	4							0.673358	0.152434	0.503669	0.121559	7.80994e-05	1.70141e-05	0.404736	0.0202069	FALSE
94.0777	positive											0.675009	0.690581	0.444661	1.02882	0.178394	0.0207808	2.52661e-05	1.91904e-06	FALSE
94.0863	positive	0.163302	C3H11NO2	CHNO2_pos	-1							1.13664	0.904693	2.19123	2.31809	3.00998e-08	1.55753e-08	0.00056244	3.61599e-05	TRUE
94.5298	positive											1.21469	1.41379	1.24076	1.40129	1.3635e-06	4.48579e-07	1.12863e-08	1.47111e-09	FALSE
94.9906	positive											0.379347	0.286701	0.653589	0.845202	0.0488193	0.0062116	0.0311008	0.00169785	FALSE
95.0161	positive											1.76681	0.958365	1.69184	1.43404	5.07322e-15	3.75773e-13	5.86555e-11	1.31794e-11	FALSE
95.0189	positive											0.884375	1.02988	1.70835	1.44698	8.63843e-06	2.34991e-06	1.8249e-09	2.76347e-10	FALSE
95.0323	positive	1.75486	[13C]C4H3NO	[13C]CHNO_pos	5							0.455934	0.708304	0.707904	1.46853	0.16828	0.0196956	3.73586e-05	2.76473e-06	FALSE
95.0335	positive											0.153417	0.933744	0.22106	1.09851	0.465512	0.0507491	8.94036e-07	8.36555e-08	FALSE
95.0396	positive											0.709295	0.827869	2.15732	2.9376	5.95529e-07	2.15776e-07	1.75402e-07	1.8417e-08	TRUE
95.0491	positive	-0.0127603	C6H6O	CHO_pos	4	phenol arene oxide oxepin	HMDB0000228 HMDB0248977 HMDB0255979	Phenols Epoxides Oxacyclic compounds	C15584 C01782	Sulfur metabolism NA NA	Sulfur metabolism	1.65358	1.31663	0.732898	0.707534	3.74536e-08	1.86904e-08	1.02312e-09	1.65255e-10	FALSE
95.0604	positive	0.0574144	C5H6N2	CHN2_pos	4	1-ethenylimidazole 2-aminopyridine 1,2-diazepine	HMDB0244017 HMDB0245026 HMDB0251148	Azoles Pyridines and derivatives Diazepines		NA NA NA		0.804321	0.446219	0.721645	0.655505	1.3719e-07	5.83522e-08	1.67243e-07	1.76137e-08	FALSE
95.0685	positive	-0.00425255	[13C]C5H7N	[13C]CHN_pos	4							0.584785	0.858088	0.900377	0.330759	0.00011888	2.48841e-05	0.131554	0.00684863	FALSE
95.084	positive											0.567991	1.02376	-1.38236	1.23112	0.107562	0.013003	0.00824116	0.000472341	FALSE
95.0855	positive	0.0361401	C7H10	CH_pos	3							1.15064	1.30591	0.668464	0.613167	1.59597e-06	5.16537e-07	2.84089e-11	6.94305e-12	FALSE
95.0866	positive											0.733387	0.461969	2.3957	0.272269	0.010915	0.00155604	0.205708	0.010526	FALSE
95.9679	positive											0.97801	0.594386	1.10923	1.27409	4.40422e-08	2.15225e-08	0.0332056	0.00180989	FALSE
96.0236	positive											0.934842	0.903525	1.4898	1.67245	7.3532e-12	2.61134e-11	6.55721e-11	1.44522e-11	FALSE
96.0332	positive											0.96103	0.917575	1.3295	1.00256	1.59267e-09	1.32125e-09	2.55699e-15	5.4379e-15	FALSE
96.042	positive											0.497483	0.681395	0.662381	1.55853	0.485918	0.0527851	0.011992	0.000677076	FALSE
96.0444	positive	-0.00210444	C5H5NO	CHNO_pos	4	1-oxide pyridine	HMDB0256967	Pyridines and derivatives		NA		0.733569	0.968255	0.694464	0.667142	0.0501297	0.00636116	2.83523e-06	2.45668e-07	FALSE
96.0525	positive	-0.0631278	[13C]C5H6O	[13C]CHO_pos	4							1.09562	0.794177	0.59282	0.748083	9.83019e-06	2.63812e-06	8.31971e-06	6.72796e-07	FALSE
96.0556	positive	-0.143085	C4H5N3	CHN3_pos	4	1,2-dihydro-2-iminopyrimidine 5-pyrimidinamine	HMDB0245027 HMDB0246752	Diazines Diazines		NA NA		0.591794	1.06801	0.803145	1.65641	0.0466517	0.00595333	0.000940677	5.89605e-05	FALSE
96.0637	positive	0.111513	[13C]C4H6N2	[13C]CHN2_pos	4							0.186964	0.69676	-0.305457	1.46325	0.590269	0.0631939	0.00014358	9.90041e-06	FALSE
96.0808	positive	-0.0589018	C6H9N	CHN_pos	3							1.09153	0.564554	0.910152	0.88405	7.72512e-08	3.53209e-08	4.51138e-10	7.92569e-11	FALSE
96.0889	positive	-0.0147242	[13C]C6H10	[13C]CH_pos	3							1.10883	0.684589	0.646362	0.604839	2.45044e-06	7.53127e-07	2.16875e-08	2.68812e-09	FALSE
96.5309	positive											0.606132	1.58577	1.38049	1.21774	2.19836e-05	5.41227e-06	1.7093e-16	1.01074e-15	FALSE
96.5349	positive											0.792179	0.746695	1.27825	1.07154	2.19549e-09	1.70921e-09	2.11339e-15	4.9745e-15	FALSE
96.5363	positive											0.445117	0.586031	1.48141	0.982888	0.128005	0.0152959	0.000141001	9.73084e-06	FALSE
96.9573	positive											1.49665	1.2396	1.59969	1.70003	0.0036284	0.00056024	1.20029e-07	1.28818e-08	TRUE
96.9952	positive											0.433288	0.472206	0.56832	1.02599	0.667524	0.0708648	0.00219817	0.000133132	FALSE
97.0076	positive											1.32004	0.934793	1.18422	0.936506	3.97096e-11	7.68246e-11	4.07741e-16	1.5691e-15	FALSE
97.0284	positive	0.0437404	C5H4O2	CHO2_pos	4	α-pyrone	HMDB0245765	Pyrans		NA		0.48474	0.71692	0.499211	0.672106	0.216767	0.0249426	2.23188e-06	1.96692e-07	FALSE
97.0312	positive											0.312874	0.589652	0.638916	1.17475	0.342776	0.0381631	2.29525e-10	4.37128e-11	FALSE
97.0325	positive											0.667099	1.2268	1.07683	1.4113	0.00195914	0.000317634	5.31589e-07	5.16758e-08	FALSE
97.0353	positive											0.887483	0.873175	1.58771	2.48773	5.70851e-07	2.07851e-07	4.18186e-09	5.92206e-10	TRUE
97.0365	positive											0.427213	1.12669	1.65061	1.44325	0.113125	0.0136214	4.96697e-05	3.62275e-06	FALSE
97.0396	positive	0.00833053	C4H4N2O	CHN2O_pos	4	pyrazine-2-one pyrimidin-5-ol 2-pyrimidone pyrimidone	HMDB0245166 HMDB0246116 HMDB0246813 HMDB0256975 HMDB0256976	Diazines Diazines Diazines Diazines Diazines		NA NA NA NA NA		1.75419	1.42947	1.24839	1.42459	9.02186e-11	1.32514e-10	1.8261e-14	1.84468e-14	FALSE
97.0497	positive											0.880925	0.564098	2.14058	1.00864	1.22348e-05	3.20708e-06	7.60692e-09	1.02514e-09	FALSE
97.0648	positive	-0.0124925	C6H8O	CHO_pos	3	2,5-dimethylfuran cyclohexenone furan, dimethyl-	HMDB0033182 HMDB0245089 HMDB0245403	Heteroaromatic compounds Organooxygen compounds Heteroaromatic compounds	C02395	NA NA NA		1.49513	1.34075	0.627822	0.528529	2.58962e-07	1.03363e-07	2.00802e-09	3.02378e-10	FALSE
97.076	positive	0.160302	C5H8N2	CHN2_pos	3	1H-imidazole, 1,2-dimethyl- 1H-pyrazole, 3,5-dimethyl- pyrrolidine-2-carbonitrile	HMDB0244082 HMDB0246065 HMDB0257000	Azoles Azoles Pyrrolidines		NA NA NA		0.751089	1.10214	1.7663	2.03935	0.000423069	7.86506e-05	4.65379e-14	3.67515e-14	TRUE
97.1012	positive	0.0353821	C7H12	CH_pos	2	methylenecyclohexane	HMDB0254637	Unsaturated hydrocarbons		NA		0.750887	0.875171	0.567899	0.401333	9.68825e-06	2.60407e-06	1.86124e-05	1.43433e-06	FALSE
98.0118	positive											1.27367	1.1899	1.22114	1.22569	1.00744e-10	1.43109e-10	1.72662e-11	4.4675e-12	FALSE
98.0192	positive											0.918593	0.942138	1.59584	1.80653	1.07179e-09	9.61436e-10	2.67052e-10	4.98803e-11	TRUE
98.0237	positive	-0.0494762	C4H3NO2	CHNO2_pos	4	2-cyanoprop-2-enoic acid maleimide	HMDB0245085 HMDB0254312	Carboxylic acids and derivatives Pyrrolidines	C07272	NA NA		1.52302	1.22577	1.14545	0.823418	1.90711e-07	7.82911e-08	2.05919e-08	2.56017e-09	FALSE
98.0278	positive											0.256683	0.482949	0.836495	1.24392	0.526584	0.056952	1.91249e-07	1.9917e-08	FALSE
98.0296	positive											0.714413	0.608984	1.30212	1.13705	1.41337e-08	8.02645e-09	8.3494e-11	1.78505e-11	FALSE
98.0306	positive											0.280969	0.676023	-0.132344	0.68379	0.861545	0.0895552	0.0111003	0.000628633	FALSE
98.0318	positive	0.0968828	[13C]C4H4O2	[13C]CHO2_pos	4							0.0952472	0.523731	0.0512848	0.850187	0.817202	0.0853394	0.0195927	0.00108698	FALSE
98.06	positive	-0.00206073	C5H7NO	CHNO_pos	3	2-hydroxypent-3-enenitrile 4-oxopentanenitrile 2-hydroxypent-2-enenitrile	HMDB0245162 HMDB0246564 HMDB0250611	NA Organooxygen compounds Organonitrogen compounds		NA NA NA		2.26185	1.35743	1.21103	1.33095	3.69665e-10	4.0014e-10	3.59193e-14	3.05555e-14	FALSE
98.0682	positive	0.0412113	[13C]C5H8O	[13C]CHO_pos	3							0.974741	0.621554	0.542643	0.321345	2.13499e-06	6.68055e-07	0.0117681	0.000664896	FALSE
98.0726	positive											0.900522	0.485054	0.889783	0.677661	0.000303569	5.81445e-05	0.0612354	0.00327221	FALSE
98.0964	positive	0.0453192	C6H11N	CHN_pos	2	2,2-dimethyl-3,4-dihydropyrrole diallylamine 1-ethenylpyrrolidine	HMDB0246849 HMDB0251129 HMDB0255247	Pyrrolines Organonitrogen compounds Pyrrolidines		NA NA NA		1.07931	0.966692	1.11817	1.36927	4.64032e-08	2.25699e-08	1.37211e-06	1.2473e-07	FALSE
98.1045	positive	-0.0144185	[13C]C6H12	[13C]CH_pos	2							0.480524	0.142707	0.161264	0.0516557	0.207005	0.0238935	0.673459	0.0329381	FALSE
98.9419	positive											0.648101	1.13112	1.74826	0.904044	2.6225e-05	6.34501e-06	0.0002934	1.9515e-05	FALSE
98.9754	positive											1.41979	1.15956	2.17516	3.36636	0.000721882	0.000128181	5.50297e-08	6.32897e-09	TRUE
98.9842	positive											1.15763	0.708817	1.17509	0.699611	5.35851e-11	9.29206e-11	0.00135729	8.38163e-05	FALSE
99.0021	positive											0.678691	1.67661	1.31712	1.33079	0.00395337	0.000605906	7.38438e-09	9.9737e-10	FALSE
99.0033	positive											1.18434	1.05732	1.13444	0.985705	1.06643e-10	1.49441e-10	1.56759e-16	9.74485e-16	FALSE
99.0044	positive											0.876397	1.33105	2.14243	1.30791	0.00438173	0.000668986	7.50134e-05	5.35523e-06	FALSE
99.0077	positive	-0.106122	C4H2O3	CHO3_pos	4	maleic anhydride moniliformin	HMDB0254311 HMDB0254845	Dihydrofurans Vinylogous acids	C20592	NA NA		1.13878	0.988934	0.943039	0.341939	0.000313161	5.9871e-05	0.0211254	0.0011672	FALSE
99.0119	positive											1.31413	1.06749	1.17385	1.51878	5.67628e-11	9.68122e-11	0.000942	5.90282e-05	FALSE
99.0203	positive											0.644073	0.593697	2.1313	0.995009	0.0062224	0.000929486	0.00497397	0.000291491	FALSE
99.027	positive	-0.0979395	[13C]C3H3NO2	[13C]CHNO2_pos	4							1.29156	1.37153	1.09651	1.0667	0.000415631	7.74344e-05	8.18076e-11	1.75518e-11	FALSE
99.0291	positive											1.23822	1.02651	3.05733	1.52556	0.00789531	0.00115737	2.83554e-05	2.13428e-06	TRUE
99.0385	positive											0.629534	1.29798	1.12838	1.37719	3.60417e-05	8.42905e-06	5.09459e-07	4.98041e-08	FALSE
99.0417	positive											0.827586	1.22243	0.852942	1.4756	2.61072e-05	6.32832e-06	0.00452492	0.000266011	FALSE
99.0429	positive											0.735302	1.02109	1.14588	1.40006	0.0805769	0.0099024	5.71494e-07	5.53109e-08	FALSE
99.0441	positive	0.0428411	C5H6O2	CHO2_pos	3	tulipalin A pent-2-enedial	HMDB0246945 HMDB0252802	Lactones Organooxygen compounds	C20578	NA NA		1.45004	1.49629	0.982158	0.997332	9.6249e-09	5.70984e-09	2.10459e-14	2.02476e-14	FALSE
99.0452	positive											0.689249	0.957693	0.461043	1.50712	0.444255	0.0485542	5.28621e-05	3.84056e-06	FALSE
99.0553	positive	0.00815927	C4H6N2O	CHN2O_pos	3	1H-pyrazol-4-ylmethanol	HMDB0060768	Azoles		NA		1.38763	1.30218	1.28718	2.18509	7.16982e-14	3.37952e-12	2.99354e-09	4.37995e-10	FALSE
99.0634	positive	-0.152974	[13C]C4H7NO	[13C]CHNO_pos	3							1.83151	1.12422	1.73851	2.39866	2.26113e-08	1.21868e-08	1.6602e-07	1.74924e-08	TRUE
99.0679	positive											0.392637	1.2281	0.731831	1.31465	0.2103	0.0242361	0.00136326	8.41426e-05	FALSE
99.0793	positive											0.377269	0.270096	0.597619	0.377945	0.247247	0.0282057	0.0508783	0.00273686	FALSE
99.0804	positive	-0.0122358	C6H10O	CHO_pos	2	(E)-2-hexenal 7-oxabicyclo 4.1.0 heptane 7-oxabicyclo[2.2.1]heptane methylpentynol allyl ether hexenal	HMDB0031496 HMDB0242573 HMDB0244220 HMDB0245924 HMDB0248165 HMDB0253154	Organooxygen compounds Oxepanes Tetrahydrofurans Organooxygen compounds Organooxygen compounds Organooxygen compounds	C08497 C08497	NA NA NA NA NA NA		1.06763	0.774305	0.760616	0.59704	3.27457e-08	1.67109e-08	1.71873e-08	2.1714e-09	FALSE
99.0816	positive											0.412065	0.302286	0.199562	0.539728	0.622515	0.0664266	0.00701799	0.000405108	FALSE
99.0917	positive	0.157008	C5H10N2	CHN2_pos	2	piperidin-2-imine	HMDB0256574	Pyridines and derivatives		NA		1.10652	0.616874	1.24357	1.45442	3.19664e-09	2.32132e-09	0.00031566	2.09039e-05	FALSE
99.1168	positive	-0.0672717	C7H14	CH_pos	1	1,1,2,3-tetramethylcyclopropane	HMDB0244046	Saturated hydrocarbons		NA		0.796702	0.49883	0.141259	0.177893	0.419342	0.046084	0.0789825	0.00418733	FALSE
99.9706	positive											1.66855	0.975266	1.35732	1.33796	1.26598e-05	3.31012e-06	6.31394e-06	5.19783e-07	FALSE
99.989	positive											0.895233	0.865811	0.935083	1.31754	0.0528499	0.00667855	0.000667712	4.25555e-05	FALSE
100.022	positive											0.41838	1.44156	1.43903	1.82604	0.0329631	0.00431481	1.67254e-06	1.5035e-07	FALSE
100.028	positive											0.610466	0.268143	1.32649	0.546857	9.45837e-07	3.23487e-07	0.000693105	4.40349e-05	FALSE
100.039	positive	-0.0484692	C4H5NO2	CHNO2_pos	3	1H-pyrrole-2,5-diol 3-cyanopropanoic acid	HMDB0244903 HMDB0245845	Pyrroles Fatty Acyls		NA NA		1.77286	1.19498	1.17044	0.967084	5.86376e-12	2.33869e-11	1.25778e-12	4.87121e-13	FALSE
100.047	positive	-0.00605815	[13C]C4H6O2	[13C]CHO2_pos	3							1.22739	1.07594	0.988875	1.14649	9.24464e-09	5.54132e-09	1.12975e-10	2.33703e-11	FALSE
100.052	positive											1.30264	0.855064	1.54153	1.51735	2.88946e-05	6.92308e-06	3.93948e-10	7.03309e-11	TRUE
100.076	positive	-0.00201881	C5H9NO	CHNO_pos	2	delta-valerolactam 2-ethyl-4,5-dihydro-1,3-oxazole 4,4-dimethyl-5H-1,3-oxazole N,N-dimethylacrylamide pyrrolidine-2-carbaldehyde	HMDB0011749 HMDB0245112 HMDB0246597 HMDB0255259 HMDB0256999	Piperidines Azolines Azolines Carboxylic acids and derivatives Pyrrolidines		NA NA NA NA NA		0.850889	1.48506	0.756578	1.33167	1.2776e-05	3.33043e-06	7.83196e-15	1.05489e-14	FALSE
100.084	positive	0.0403728	[13C]C5H10O	[13C]CHO_pos	2							0.764784	0.478267	0.660703	0.5481	1.26968e-05	3.31477e-06	1.43706e-05	1.12243e-06	FALSE
100.112	positive	-0.0565058	C6H13N	CHN_pos	1	cyclohexylamine 1-ethyl-pyrrolidine N-methylpiperidine	HMDB0031404 HMDB0243879 HMDB0243944	Organonitrogen compounds Pyrrolidines Piperidines	C00571	NA NA NA		0.973901	1.10031	1.66268	1.99898	6.56814e-08	3.06802e-08	1.7484e-12	6.36464e-13	TRUE
100.932	positive											0.959932	0.88127	1.76862	1.37358	9.81315e-05	2.09469e-05	3.71227e-09	5.32234e-10	FALSE
100.999	positive											1.50767	1.07381	1.38821	1.17107	9.19485e-09	5.52425e-09	5.3084e-15	7.84742e-15	FALSE
101.008	positive											0.799921	1.02526	1.03202	1.25572	0.00799027	0.00116997	1.40979e-08	1.79985e-09	FALSE
101.023	positive	-0.00399936	C4H4O3	CHO3_pos	3							1.01557	0.551195	1.07929	0.784089	1.99066e-09	1.58303e-09	3.17606e-09	4.63025e-10	FALSE
101.035	positive	-0.0379896	C3H4N2O2	CHN2O2_pos	3	hydantoin 4-hydroxy-1,3-dihydroimidazol-2-one	HMDB0253235 HMDB0253419	Azoles Azoles	C05146	NA NA		1.26837	1.17893	1.27178	1.13562	4.27126e-07	1.60246e-07	1.78379e-06	1.59404e-07	FALSE
101.043	positive	0.00399859	[13C]C3H5NO2	[13C]CHNO2_pos	3							1.09459	1.16455	1.43259	1.45388	1.03959e-05	2.77844e-06	1.35883e-09	2.13228e-10	FALSE
101.058	positive											0.677862	1.01605	1.10845	0.99602	0.0160641	0.0022093	8.51741e-06	6.87408e-07	FALSE
101.06	positive	0.041978	C5H8O2	CHO2_pos	2	delta-valerolactone 2-pentenoic acid	HMDB0250981 HMDB0256282	Lactones Fatty Acyls	C02240	NA NA		1.17595	1.73615	0.89386	0.801971	1.3777e-08	7.84106e-09	6.55035e-11	1.44502e-11	FALSE
101.061	positive											0.643026	1.40191	0.559138	1.22615	0.243395	0.027803	1.08806e-06	1.00339e-07	FALSE
101.071	positive	0.107931	C4H8N2O	CHN2O_pos	2							0.766692	1.15042	2.02587	2.39393	7.84549e-05	1.70844e-05	5.53721e-07	5.36551e-08	TRUE
101.073	positive											0.416865	1.13665	0.562301	2.61352	0.065289	0.00814916	2.60521e-05	1.97502e-06	FALSE
101.079	positive	0.0499641	[13C]C4H9NO	[13C]CHNO_pos	2							0.804653	1.33315	0.736453	1.7207	2.10792e-05	5.23435e-06	3.73489e-13	1.78951e-13	FALSE
101.096	positive	-0.0119894	C6H12O	CHO_pos	1	hexanal butyl vinyl ether	HMDB0005994 HMDB0255093	Organooxygen compounds Organooxygen compounds	C02373	NA NA		0.770367	1.03108	0.663618	0.686377	6.0887e-05	1.35549e-05	1.00824e-08	1.33064e-09	FALSE
101.986	positive											0.989225	1.3573	1.63002	1.8466	1.36393e-05	3.52358e-06	4.32767e-11	1.01471e-11	TRUE
102.019	positive	-0.0930589	C3H3NO3	CHNO3_pos	3	oxazolidinedione 4-hydroxy-3H-1,3-oxazol-2-one	HMDB0245467 HMDB0253283	Azolidines Azoles		NA NA		0.894078	1.19989	0.798717	0.932886	0.00116766	0.000198824	0.00183381	0.000111875	FALSE
102.027	positive	-0.0514753	[13C]C3H4O3	[13C]CHO3_pos	3							0.496734	0.6998	0.9456	0.953125	0.0177305	0.00242178	0.00155052	9.53845e-05	FALSE
102.033	positive											0.543625	0.374641	0.853214	0.546116	0.0228042	0.0030568	0.0301647	0.00164859	FALSE
102.037	positive											0.74006	0.852364	1.98899	1.71312	0.00213508	0.000344435	9.75594e-07	9.06919e-08	TRUE
102.055	positive	-0.0475023	C4H7NO2	CHNO2_pos	2	2,3-butanedione monoxime azetidinecarboxylic acid 3-azetidinecarboxylic acid N-(hydroxymethyl)prop-2-enimidic acid 3-nitrosobutan-2-one	HMDB0245382 HMDB0246969 HMDB0248797 HMDB0255023 HMDB0257634	Organonitrogen compounds Azetidines Azetidines Carboxylic acids and derivatives Organooxygen compounds	C19456	NA NA NA NA NA		1.29376	1.17638	1.0715	1.30098	5.49176e-11	9.42853e-11	3.9241e-14	3.24698e-14	FALSE
102.063	positive	-0.00593731	[13C]C4H8O2	[13C]CHO2_pos	2							1.05607	1.37622	0.908374	0.844634	7.08457e-09	4.4044e-09	6.43193e-11	1.42538e-11	FALSE
102.091	positive	-0.00197855	C5H11NO	CHNO_pos	1	pentanimidic acid	HMDB0256275	Fatty Acyls	C01842	NA		2.10999	1.17407	1.40817	0.734717	6.7109e-11	1.09419e-10	5.3027e-10	9.15013e-11	FALSE
102.099	positive	-0.158271	[13C]C5H12O	[13C]CHO_pos	1							0.866403	0.370807	-1.07091	0.561318	0.0890185	0.0108805	0.00516832	0.000302442	FALSE
102.128	positive	0.0435125	C6H15N	CHN_pos	0	diisopropylamine dimethylbutylamine	HMDB0251358 HMDB0255261	Organonitrogen compounds Organonitrogen compounds		NA NA		1.0018	0.653119	1.5664	1.51011	1.1057e-09	9.86738e-10	1.98294e-08	2.47936e-09	TRUE
102.968	positive											1.20364	1.25091	1.66095	1.57387	0.021419	0.00288755	5.04406e-13	2.29435e-13	TRUE
102.97	positive											0.824669	1.7961	1.20545	1.09054	3.97462e-10	4.24906e-10	6.89686e-16	2.35505e-15	FALSE
102.972	positive											1.02867	1.16104	1.91642	2.04178	0.0364218	0.00473173	7.78922e-11	1.68309e-11	TRUE
103.021	positive											0.447116	0.352422	0.880009	0.711172	0.000100411	2.1372e-05	6.42825e-05	4.62181e-06	FALSE
103.039	positive	-0.00392035	C4H6O3	CHO3_pos	2	2-oxobutanoic acid acetoacetic acid 2-oxoethyl acetate methyl-pyruvate propylene carbonate	HMDB0000005 HMDB0000060 HMDB0245285 HMDB0254610 HMDB0256840	Keto acids and derivatives Keto acids and derivatives Organooxygen compounds Keto acids and derivatives Organic carbonic acids and derivatives	C00109 C00164	Glycine, serine and threonine metabolism | Methionine Metabolism | Propanoate metabolism | Selenocompound metabolism Butyrate Metabolism | Ketone Body Metabolism | Phenylalanine and Tyrosine Metabolism | Tyrosine metabolism | Valine, leucine and isoleucine degradation NA NA NA	Butyrate Metabolism | Ketone Body Metabolism | Phenylalanine and Tyrosine Metabolism | Tyrosine metabolism | Valine, leucine and isoleucine degradation | Glycine, serine and threonine metabolism | Methionine Metabolism | Propanoate metabolism | Selenocompound metabolism	0.77761	0.571036	0.750391	0.809348	2.89925e-07	1.14488e-07	5.61965e-08	6.44788e-09	FALSE
103.041	positive											0.64661	0.733016	0.710167	1.51693	0.173317	0.0202394	2.47351e-06	2.1618e-07	FALSE
103.05	positive	-0.0372392	C3H6N2O2	CHN2O2_pos	2	cycloserine 3-amino-1,3-oxazolidin-2-one 2-hydrazinylidenepropanoic acid (+-)-4-amino-3-isoxazolidinone propanediimidic acid	HMDB0014405 HMDB0060739 HMDB0245750 HMDB0251514 HMDB0254314	Azolines Azolidines Carboxylic acids and derivatives Carboxylic acids and derivatives Organooxygen compounds	C08057 C06682	NA NA NA NA NA		1.16858	1.34253	1.14628	1.40699	3.75009e-10	4.02563e-10	1.20082e-13	7.66129e-14	FALSE
103.054	positive	-0.0646761	C8H6	CH_pos	6							0.683915	1.30846	-0.144069	1.31721	0.280087	0.0316941	9.10838e-10	1.49005e-10	FALSE
103.058	positive											0.92266	0.924483	1.86722	1.60455	0.00900309	0.00130464	5.71505e-08	6.55423e-09	TRUE
103.058	positive	0.29789	[13C]C3H7NO2	[13C]CHNO2_pos	2							1.00006	1.03077	2.99338	1.9068	0.00100685	0.000173263	3.15903e-05	2.36091e-06	TRUE
103.064	positive											1.04368	0.683442	-0.21051	1.05902	0.6165	0.0657983	0.00150061	9.24548e-05	FALSE
103.075	positive	0.041149	C5H10O2	CHO2_pos	1	isovaleric acid N-valeric acid 5-hydroxy-2-pentanone 4-hydroxy-2-pentanone tert-butyloxycarbonyl group	HMDB0000718 HMDB0000892 HMDB0245797 HMDB0246464 HMDB0258843	Fatty Acyls Fatty Acyls Organooxygen compounds Organooxygen compounds Carboxylic acids and derivatives	C08262 C00803	NA NA NA NA NA		0.957292	0.725215	0.809338	0.885771	6.56192e-06	1.85007e-06	6.70479e-08	7.59944e-09	FALSE
103.087	positive	0.1058	C4H10N2O	CHN2O_pos	1	propylurea	HMDB0255240	Organic carbonic acids and derivatives		NA		1.00488	1.1652	0.857702	2.31873	9.67341e-06	2.60143e-06	4.48159e-05	3.28553e-06	FALSE
103.095	positive	0.0489776	[13C]C4H11NO	[13C]CHNO_pos	1							2.12011	1.08083	1.42428	1.24227	9.39149e-11	1.34886e-10	0.0150646	0.000842124	FALSE
103.539	positive											0.733102	0.637667	2.2536	0.854683	0.033548	0.00438695	0.01901	0.00105562	FALSE
103.956	positive											0.869461	1.06819	1.87863	1.18276	0.00129039	0.00021772	0.00265588	0.000159341	FALSE
103.974	positive											0.800101	1.51433	1.25825	1.30726	2.03609e-09	1.6142e-09	3.25983e-15	6.03295e-15	FALSE
103.974	positive											0.688101	1.29399	2.06994	2.0741	0.00879489	0.00127876	3.45703e-07	3.4662e-08	TRUE
103.996	positive											0.464947	0.14018	0.891781	0.386883	0.00765068	0.00112278	0.152059	0.00788062	FALSE
104.031	positive											0.457015	0.769666	1.13382	1.19859	7.53416e-05	1.64548e-05	2.41589e-08	2.96414e-09	FALSE
104.034	positive	0.00582372	C3H5NO3	CHNO3_pos	2	amino 2-oxopropanoate glycine, N-formyl-	HMDB0248343 HMDB0255145	Keto acids and derivatives Carboxylic acids and derivatives		NA NA		0.884552	1.45216	1.2084	0.934218	1.3797e-09	1.17851e-09	8.16654e-08	9.05308e-09	FALSE
104.042	positive	0.0465861	[13C]C3H6O3	[13C]CHO3_pos	2							0.199274	0.862027	0.265758	1.93888	0.573445	0.061558	1.31101e-05	1.03096e-06	FALSE
104.045	positive											0.858319	1.25077	1.37398	1.59795	0.000219278	4.31965e-05	2.66378e-15	5.47297e-15	FALSE
104.049	positive	-0.0543467	C7H5N	CHN_pos	6							0.948587	0.481974	0.717437	0.657513	0.00235736	0.000376429	0.000305907	2.02746e-05	FALSE
104.062	positive											0.65431	0.645923	-1.28015	0.0943387	0.0855648	0.0104806	0.832341	0.0402702	FALSE
104.071	positive	-0.0465733	C4H9NO2	CHNO2_pos	1	dimethylglycine gamma(amino)-butyric acid (-)-2-aminobutyric acid D-2-aminobutyric acid α-aminoisobutyric acid L-β-aminoisobutyric acid (+)-β-aminoisobutyric acid 2-hydroxy-2-methylpropanamide Abu 1-amino-4-hydroxybutan-2-one amino-acetic acid ethyl ester isobutyl nitrite 2-(methylamino)propanoic acid	HMDB0000092 HMDB0000112 HMDB0000452 HMDB0000650 HMDB0001906 HMDB0002166 HMDB0003911 HMDB0244529 HMDB0245013 HMDB0247545 HMDB0252025 HMDB0253612 HMDB0255173	Carboxylic acids and derivatives Carboxylic acids and derivatives Carboxylic acids and derivatives Carboxylic acids and derivatives Carboxylic acids and derivatives Carboxylic acids and derivatives Carboxylic acids and derivatives Organooxygen compounds Carboxylic acids and derivatives Organooxygen compounds Carboxylic acids and derivatives Organonitrogen compounds Carboxylic acids and derivatives	C01026 C00334 C02356 C02261 C03665 C03284 C05145	Glycine, serine and threonine metabolism | Glycine, serine and threonine metabolism | Methionine Metabolism Glutamate Metabolism NA NA NA Valine, leucine and isoleucine degradation Pyrimidine metabolism NA NA NA NA NA NA	Glutamate Metabolism | Glycine, serine and threonine metabolism | Glycine, serine and threonine metabolism | Methionine Metabolism | Pyrimidine metabolism | Valine, leucine and isoleucine degradation	1.21937	1.14189	1.07707	1.30826	1.5027e-08	8.45963e-09	6.4924e-14	4.71266e-14	FALSE
104.079	positive	-0.00582121	[13C]C4H10O2	[13C]CHO2_pos	1							0.630986	0.350197	0.571644	0.815618	0.0235567	0.00315116	0.00244295	0.000147148	FALSE
104.107	positive	-0.00193987	C5H13NO	CHNO_pos	0	2-amino-3-methyl-1-butanol	HMDB0244984	Organonitrogen compounds		NA		1.14201	0.891932	1.58759	2.13729	3.14354e-11	6.65262e-11	1.66763e-11	4.33802e-12	TRUE
104.951	positive											0.955879	1.02055	2.10163	1.73285	3.64938e-07	1.39953e-07	6.79984e-13	2.93339e-13	TRUE
104.966	positive											0.703104	1.4133	1.21967	1.40215	2.62407e-07	1.04577e-07	9.08031e-15	1.17098e-14	FALSE
104.973	positive											1.10011	0.652369	0.307152	1.5236	0.685381	0.0726415	0.00171663	0.000104991	FALSE
104.975	positive											0.832298	1.33065	1.32481	1.35658	6.36156e-08	2.98768e-08	1.19489e-13	7.66377e-14	FALSE
105.003	positive											1.13207	1.71844	1.18569	1.08276	2.26571e-10	2.73197e-10	1.42327e-16	9.58496e-16	FALSE
105.018	positive											0.391534	0.619283	0.85752	1.09672	0.00939775	0.00135652	1.28014e-05	1.00864e-06	FALSE
105.029	positive											0.320982	1.08937	1.01973	1.80826	0.00914887	0.00132391	8.44314e-05	5.98529e-06	FALSE
105.033	positive	0.0845941	C7H4O	CHO_pos	6							1.34344	1.09754	0.828866	0.584346	8.3037e-08	3.73406e-08	1.07191e-10	2.22496e-11	FALSE
105.037	positive											0.75854	0.776578	1.15911	1.46682	6.1278e-07	2.21099e-07	3.98746e-10	7.10305e-11	FALSE
105.038	positive											0.903375	1.00627	1.30544	1.03558	6.59041e-10	6.39898e-10	4.53773e-15	7.33422e-15	FALSE
105.04	positive											0.565187	1.0459	1.26239	0.915741	0.0603174	0.00755409	0.00150696	9.27987e-05	FALSE
105.045	positive	0.0519044	C6H4N2	CHN2_pos	6							1.65806	0.25334	0.857243	-0.239168	1.00532e-07	4.41359e-08	0.29138	0.0147141	FALSE
105.055	positive	-0.0038444	C4H8O3	CHO3_pos	1	(S)-2-hydroxybutyric acid (-)-3-hydroxybutyric acid (S)-3-hydroxyisobutyric acid (R)-3-hydroxyisobutyric acid β-hydroxybutyrate,l gamma hydroxybutyric acid acetonate 1-(oxiran-2-yl)ethane-1,2-diol methyl 2-hydroxypropanoate	HMDB0000008 HMDB0000011 HMDB0000023 HMDB0000336 HMDB0000442 HMDB0000710 HMDB0000729 HMDB0243558 HMDB0254599	Hydroxy acids and derivatives Hydroxy acids and derivatives Hydroxy acids and derivatives Hydroxy acids and derivatives Hydroxy acids and derivatives Fatty Acyls Hydroxy acids and derivatives Organooxygen compounds Carboxylic acids and derivatives	C05984 C01089 C06001 C03197 C01991	Propanoate metabolism Ketone Body Metabolism Valine, leucine and isoleucine degradation NA NA NA NA NA NA	Ketone Body Metabolism | Propanoate metabolism | Valine, leucine and isoleucine degradation	1.0129	0.573321	0.814671	0.469601	1.09423e-05	2.90501e-06	0.000671953	4.28033e-05	FALSE
105.07	positive	0.0326726	C8H8	CH_pos	5	styrene	HMDB0034240	Benzene and substituted derivatives	C19506	NA		0.558763	0.656633	0.209679	0.388605	0.0151891	0.00210122	4.67348e-05	3.41897e-06	FALSE
105.074	positive	0.00384369	[13C]C3H9NO2	[13C]CHNO2_pos	1							0.843207	1.06154	1.52802	1.71648	0.0103814	0.00148651	8.16745e-08	9.04994e-09	TRUE
105.091	positive	-0.0557244	C5H12O2	CHO2_pos	0	pentane-1,3-diol 2-isopropoxyethanol 2,2-dimethoxypropane pentane-2,3-diol	HMDB0244179 HMDB0245182 HMDB0245331 HMDB0256276	Organooxygen compounds Organooxygen compounds Organooxygen compounds Organooxygen compounds		NA NA NA NA		1.29244	0.50837	0.713055	0.699095	0.00280767	0.000441671	7.59897e-05	5.42014e-06	FALSE
105.54	positive											0.79799	0.851423	1.28229	1.07541	1.31953e-07	5.65425e-08	3.65747e-15	6.56831e-15	FALSE
105.542	positive											0.494304	0.803965	1.12313	1.14801	0.000183546	3.68434e-05	1.14075e-07	1.22808e-08	FALSE
105.935	positive											0.772387	1.079	1.28138	1.14793	0.000213343	4.21876e-05	4.27914e-10	7.57257e-11	FALSE
105.955	positive											1.16053	0.893393	1.50138	1.19589	0.00353441	0.000546867	5.20399e-06	4.3371e-07	FALSE
105.959	positive											1.12103	0.992659	2.59454	1.42991	8.59367e-06	2.34019e-06	1.33294e-05	1.04684e-06	FALSE
105.966	positive											0.526389	0.868282	1.73514	1.20925	9.10576e-05	1.95739e-05	0.000301867	2.00343e-05	FALSE
106.004	positive											1.02924	1.35206	1.15	1.28168	1.75848e-09	1.42908e-09	2.38373e-15	5.15995e-15	FALSE
106.007	positive											0.927504	1.10946	0.885511	1.94735	0.0847136	0.0103862	1.33609e-05	1.04829e-06	FALSE
106.008	positive											1.22607	0.990945	1.52483	3.57912	2.43117e-11	5.60237e-11	1.37371e-05	1.07607e-06	TRUE
106.013	positive											0.486784	0.659459	1.04693	1.40458	0.107788	0.0130273	1.55369e-05	1.20769e-06	FALSE
106.034	positive											0.317255	0.940578	-0.175496	1.62111	0.852359	0.0887605	1.27105e-05	1.00181e-06	FALSE
106.037	positive											1.16007	0.834496	2.03585	1.1264	0.000163377	3.32583e-05	1.7451e-13	1.01948e-13	FALSE
106.041	positive											0.629553	0.659013	1.51638	1.19693	4.57577e-07	1.7056e-07	6.38481e-10	1.08172e-10	FALSE
106.042	positive											0.541605	0.90734	1.1696	1.22088	0.0264915	0.00352465	2.54684e-06	2.21868e-07	FALSE
106.05	positive	0.00571197	C3H7NO3	CHNO3_pos	1	L-serine D-serine 2,3-dihydroxypropanamide 3-nitropropanol	HMDB0000187 HMDB0003406 HMDB0245395 HMDB0245951	Carboxylic acids and derivatives Carboxylic acids and derivatives Organooxygen compounds Allyl-type 1,3-dipolar organic compounds	C00065 C00740	Glycine, serine and threonine metabolism | Methionine Metabolism | Nitrogen metabolism | Selenocompound metabolism | Starch and sucrose metabolism Glycine, serine and threonine metabolism NA NA	Glycine, serine and threonine metabolism | Glycine, serine and threonine metabolism | Methionine Metabolism | Nitrogen metabolism | Selenocompound metabolism | Starch and sucrose metabolism	0.739361	1.8313	1.25186	1.53343	9.36452e-07	3.20912e-07	2.49478e-12	8.67773e-13	FALSE
106.065	positive	0.0418817	C7H7N	CHN_pos	5	2-vinylpyridine 4-vinylpyridine hepta-2,4,6-trienenitrile	HMDB0245325 HMDB0246594 HMDB0253106	Pyridines and derivatives Pyridines and derivatives Organonitrogen compounds		NA NA NA		0.836094	0.952057	0.86789	0.120465	2.10058e-07	8.52882e-08	0.117497	0.00614988	FALSE
106.073	positive	-0.013325	[13C]C7H8	[13C]CH_pos	5							0.313231	0.228796	0.078336	-0.0366842	0.405443	0.0446606	0.81874	0.0396993	FALSE
106.086	positive	-0.0456799	C4H11NO2	CHNO2_pos	0	AMPD 2-aminobutane-1,3-diol	HMDB0244975 HMDB0253919	Organonitrogen compounds Organonitrogen compounds	C11260	NA NA		1.18529	1.01008	1.28303	1.11809	5.47337e-10	5.48913e-10	1.80843e-13	1.0464e-13	FALSE
106.943	positive											0.667959	0.636027	1.89566	1.08346	0.00325488	0.000506337	0.00400292	0.000236586	FALSE
106.963	positive											0.812931	1.75006	1.18468	1.06986	3.04574e-09	2.23364e-09	2.20069e-12	7.78888e-13	FALSE
106.966	positive											0.975828	0.894032	1.7991	2.12497	2.0228e-06	6.35252e-07	4.92127e-09	6.84913e-10	TRUE
106.978	positive											1.0029	1.32143	1.11592	1.10526	1.83553e-05	4.6065e-06	5.18531e-11	1.18822e-11	FALSE
106.992	positive											0.961548	0.812901	1.01297	1.19755	8.60885e-08	3.85124e-08	1.1682e-09	1.86697e-10	FALSE
107.001	positive											1.03115	1.49023	1.15252	1.29938	1.78691e-09	1.44764e-09	1.92238e-15	4.75576e-15	FALSE
107.007	positive											0.630008	1.00798	2.51337	1.89622	0.00218642	0.000351623	0.000200602	1.36002e-05	TRUE
107.035	positive											0.644723	0.756751	1.31586	1.13582	4.58581e-07	1.70811e-07	5.95178e-15	8.64047e-15	FALSE
107.043	positive	1.4297	[13C]C4H3N3	[13C]CHN3_pos	6							0.589624	0.290236	1.52364	0.742257	1.89704e-06	6.00119e-07	0.0410347	0.00222562	FALSE
107.049	positive	-0.0113163	C7H6O	CHO_pos	5	benzaldehyde	HMDB0006115	Benzene and substituted derivatives	C00261	NA		0.460238	0.469033	-0.220033	0.273595	0.0642331	0.00802703	0.000684013	4.35029e-05	FALSE
107.052	positive											0.868563	0.545782	0.841012	1.63974	0.0106462	0.00151981	1.76861e-06	1.58282e-07	FALSE
107.06	positive	-0.137667	C6H6N2	CHN2_pos	5	2-methylidenepentanedinitrile	HMDB0245227	Organonitrogen compounds		NA		1.19212	0.892473	1.58947	1.23586	0.000545033	9.90166e-05	3.5309e-06	3.01634e-07	FALSE
107.07	positive	-0.00377134	C4H10O3	CHO3_pos	0	diethylene glycol	HMDB0251245	Organooxygen compounds	C14689	NA		0.668727	1.20311	0.47573	0.891072	0.00692903	0.00102588	1.55212e-12	5.78032e-13	FALSE
107.073	positive											0.694415	1.38084	1.17104	-0.570466	0.0119876	0.00169589	0.000327281	2.16439e-05	FALSE
107.086	positive	0.0320518	C8H10	CH_pos	4	M-xylene ortho-xylene ethylbenzene	HMDB0059810 HMDB0059851 HMDB0059905	Benzene and substituted derivatives Benzene and substituted derivatives Benzene and substituted derivatives	C07208 C07212 C07111	NA NA NA		1.13219	1.29582	0.50629	0.535808	0.000170642	3.45071e-05	3.38162e-09	4.88876e-10	FALSE
107.09	positive	0.00377066	[13C]C3H11NO2	[13C]CHNO2_pos	0							0.829008	0.626548	1.67926	1.48947	0.000182543	3.66562e-05	3.95696e-06	3.35548e-07	FALSE
107.541	positive											0.558868	0.742988	0.650536	1.52713	0.087513	0.0107066	9.41476e-11	1.98481e-11	FALSE
107.95	positive											1.89029	1.48237	1.05143	0.918798	8.7214e-09	5.28265e-09	1.55563e-14	1.6837e-14	FALSE
107.967	positive											0.210838	0.393527	0.984433	1.45778	0.273753	0.0310518	3.00227e-05	2.25139e-06	FALSE
107.973	positive											0.54664	1.03863	1.61353	1.47259	4.02386e-05	9.3098e-06	5.30084e-08	6.11682e-09	FALSE
107.974	positive											0.66681	0.862409	1.90906	2.16854	3.75287e-08	1.87098e-08	8.4596e-10	1.39237e-10	TRUE
107.994	positive											0.757754	0.426472	1.97136	1.16843	0.00226976	0.000363898	2.39609e-07	2.45629e-08	FALSE
108.029	positive											0.365644	1.2038	1.57089	1.69033	0.125488	0.0150159	6.34146e-06	5.21695e-07	FALSE
108.044	positive	-0.00186851	C6H5NO	CHNO_pos	5	2-formylpyridine 3-pyridinecarboxaldehyde 4-formylpyridine nitrosobenzene p-benzoquinone imine	HMDB0245308 HMDB0245978 HMDB0246576 HMDB0255658 HMDB0256032	Pyridines and derivatives Pyridines and derivatives Pyridines and derivatives Benzene and substituted derivatives Organonitrogen compounds	C07327 C06876	NA NA NA NA NA		1.31146	0.754938	0.892421	0.407668	8.25786e-08	3.71668e-08	0.0211044	0.00116631	FALSE
108.052	positive	-0.0560511	[13C]C6H6O	[13C]CHO_pos	5							0.725789	0.0466591	-0.547748	-0.0265658	0.00225657	0.000361895	0.839281	0.0405979	FALSE
108.057	positive											0.883626	0.686114	0.323119	-0.220753	0.165571	0.0194092	0.6286	0.0308312	FALSE
108.06	positive											0.723801	0.367818	1.33078	1.20828	3.34796e-06	9.9878e-07	4.96998e-10	8.64368e-11	FALSE
108.066	positive	0.00560443	C3H9NO3	CHNO3_pos	0							0.971194	1.3887	1.51786	2.78961	0.000250254	4.87063e-05	4.19648e-11	9.8681e-12	TRUE
108.074	positive	0.044832	[13C]C3H10O3	[13C]CHO3_pos	0							0.722548	0.965299	0.26801	2.13319	0.584528	0.062631	0.0001902	1.29348e-05	FALSE
108.081	positive	-0.0523005	C7H9N	CHN_pos	4	benzylamine 2-ethylpyridine M-toluidine methylaniline P-toluidine	HMDB0033871 HMDB0245123 HMDB0254283 HMDB0255185 HMDB0256058	Benzene and substituted derivatives Pyridines and derivatives Benzene and substituted derivatives Organonitrogen compounds Benzene and substituted derivatives	C15562 C02299	NA NA NA NA NA		1.29246	1.0168	0.915317	0.789566	3.16254e-10	3.54923e-10	6.95914e-12	2.04755e-12	FALSE
108.089	positive	-0.0130741	[13C]C7H10	[13C]CH_pos	4							0.656281	0.528562	0.400323	0.309559	0.00130709	0.000220322	0.00565417	0.000329759	FALSE
108.093	positive											0.584733	0.362287	0.726996	0.60191	0.029804	0.00392607	0.0443274	0.00239563	FALSE
108.102	positive	0.0485552	C4H13NO2	CHNO2_pos	-1							1.13687	0.935129	1.45939	1.74428	7.99311e-09	4.88144e-09	4.25301e-06	3.5902e-07	FALSE
108.56	positive											0.430938	0.577503	1.61632	1.45223	2.8426e-05	6.82657e-06	1.3152e-05	1.03392e-06	FALSE
108.562	positive											0.766497	0.629452	3.03032	1.04712	0.000973481	0.000167966	1.98185e-06	1.75872e-07	FALSE
108.958	positive											1.57026	1.44074	1.21369	1.01391	9.45463e-13	8.30868e-12	3.50003e-13	1.71079e-13	FALSE
108.972	positive											0.732517	1.11668	1.34989	1.48209	0.00433663	0.000662491	1.89675e-06	1.68814e-07	FALSE
108.994	positive											0.677403	1.03719	1.23518	1.25222	0.0188504	0.00256529	7.05204e-07	6.7021e-08	FALSE
109.028	positive	0.0388813	C6H4O2	CHO2_pos	5	furo[3,2-b]furan	HMDB0252543	Heteroaromatic compounds		NA		1.55098	0.989534	1.16531	1.14307	4.32519e-10	4.53043e-10	1.49308e-08	1.90018e-09	FALSE
109.032	positive											0.317825	0.537592	0.559963	1.12328	0.310385	0.0348713	2.61422e-05	1.98123e-06	FALSE
109.033	positive											0.702255	1.00647	1.24782	1.3232	0.00019656	3.91527e-05	5.92625e-07	5.71053e-08	FALSE
109.059	positive	-1.18832	[13C]C4H5N3	[13C]CHN3_pos	5							0.65875	0.536789	2.11746	0.883713	0.0199374	0.00270398	0.000753176	4.77389e-05	FALSE
109.063	positive											0.773061	0.38002	-0.217328	0.26067	0.799917	0.0837874	0.368002	0.0184261	FALSE
109.065	positive	-0.0111052	C7H8O	CHO_pos	4	P-cresol M-cresol o-cresol benzyl alcohol	HMDB0001858 HMDB0002048 HMDB0002055 HMDB0003119	Phenols Phenols Phenols Benzene and substituted derivatives	C01468 C01467 C01542 C03485	NA NA NA NA		0.92287	0.975587	0.463521	0.429193	0.000118172	2.47459e-05	3.35068e-06	2.87352e-07	FALSE
109.076	positive	-0.0425655	C6H8N2	CHN2_pos	4	4-methyl-1H-pyridin-2-imine adiponitrile developer C o-phenylenediamine p-phenylenediamine phenylhydrazine	HMDB0246517 HMDB0248015 HMDB0254282 HMDB0255864 HMDB0256055 HMDB0256439	Pyridines and derivatives Organonitrogen compounds Benzene and substituted derivatives Benzene and substituted derivatives Benzene and substituted derivatives Benzene and substituted derivatives	C02454 C14402 C19499 C02304	NA NA NA NA NA NA		0.82364	0.736622	0.740627	0.505349	1.36257e-07	5.80505e-08	4.11156e-06	3.47806e-07	FALSE
109.084	positive	-0.00370107	[13C]C6H9N	[13C]CHN_pos	4							0.823452	0.592625	0.769859	0.974241	0.00075206	0.000133038	9.8266e-08	1.07025e-08	FALSE
109.099	positive											0.286091	0.796295	-0.245662	0.536253	0.265619	0.030182	0.0062503	0.00036278	FALSE
109.101	positive	0.0314541	C8H12	CH_pos	3	cyclohexene, 1-ethenyl- 4-vinylcyclohexene cyclooctyne	HMDB0244016 HMDB0246592 HMDB0250663	Unsaturated hydrocarbons Unsaturated hydrocarbons Unsaturated hydrocarbons	C19310	NA NA NA		1.11241	1.17699	0.647625	0.622414	8.14722e-07	2.85422e-07	5.11102e-07	4.99244e-08	FALSE
109.103	positive											0.215667	0.589966	0.0416579	0.177863	0.839895	0.0875505	0.505806	0.0250211	FALSE
110.036	positive											0.937232	0.49399	1.26003	-0.0245386	6.40793e-05	1.41682e-05	0.905369	0.0435947	FALSE
110.049	positive											0.533652	0.812069	1.29565	0.962859	9.32546e-06	2.51962e-06	7.89472e-07	7.44461e-08	FALSE
110.06	positive	-0.00183397	C6H7NO	CHNO_pos	4	aminophenol 2-pyridinemethanol m-aminophenol β pyridylcarbinol carbapenem RS 533 O-aminophenol	HMDB0001169 HMDB0245309 HMDB0245818 HMDB0245980 HMDB0249611 HMDB0255865	Benzene and substituted derivatives Pyridines and derivatives Benzene and substituted derivatives Pyridines and derivatives Lactams Benzene and substituted derivatives	C02372 C05058	NA NA NA NA NA NA		1.54032	0.90726	0.938277	0.429718	1.35848e-08	7.76579e-09	1.85092e-05	1.42683e-06	FALSE
110.068	positive	0.0366768	[13C]C6H8O	[13C]CHO_pos	4							0.741648	0.569794	0.346849	0.207118	0.00138973	0.000232513	0.0629356	0.00335936	FALSE
110.071	positive	-0.308076	C5H7N3	CHN3_pos	4	2(1H)-pyridinone, hydrazone 3,4-diaminopyridine	HMDB0245139 HMDB0246022	Pyridines and derivatives Pyridines and derivatives		NA NA		0.441598	0.964305	0.894606	1.49583	0.479593	0.0521417	0.00090616	5.69442e-05	FALSE
110.073	positive											0.247961	0.764556	-0.248077	0.95157	0.623894	0.0665464	0.0391403	0.00212572	FALSE
110.079	positive	0.188866	[13C]C5H8N2	[13C]CHN2_pos	4							0.350215	0.53215	-1.1821	0.0955165	0.160434	0.0188581	0.757493	0.0368548	FALSE
110.081	positive	0.00550086	C3H11NO3	CHNO3_pos	-1							1.11127	1.42884	0.919096	1.48489	8.79382e-06	2.38467e-06	3.93201e-09	5.60095e-10	FALSE
110.096	positive	0.040334	C7H11N	CHN_pos	3							0.862898	0.277284	0.856474	0.474552	1.13664e-07	4.93165e-08	0.00660098	0.000381946	FALSE
110.105	positive	-0.0128326	[13C]C7H12	[13C]CH_pos	3							1.08699	1.11141	0.629112	0.623629	1.32763e-06	4.38166e-07	9.77704e-07	9.08184e-08	FALSE
110.107	positive											0.297787	0.702599	0.133634	0.317863	0.797793	0.0835819	0.143085	0.00742823	FALSE
110.96	positive											0.733852	1.12148	1.71829	1.66247	3.24655e-05	7.67579e-06	9.47878e-09	1.25921e-09	TRUE
110.971	positive											1.1464	1.2653	1.63326	1.67973	0.000941591	0.000162681	2.86276e-08	3.47374e-09	TRUE
110.996	positive											0.86072	0.753459	1.82192	1.18107	3.28385e-07	1.27539e-07	6.65718e-10	1.11849e-10	FALSE
111.023	positive											0.630156	0.740532	1.0737	1.10229	8.05566e-08	3.65102e-08	0.00356316	0.000211367	FALSE
111.038	positive											0.508533	0.394189	0.933011	0.623798	0.00021279	4.20944e-05	5.66397e-05	4.1015e-06	FALSE
111.042	positive											0.813699	0.280453	0.721421	0.545913	0.000757214	0.000133813	0.00204064	0.000124149	FALSE
111.044	positive	0.0381691	C6H6O2	CHO2_pos	4	catechol α-hydroquinone hexa-2,4-dienedial	HMDB0000957 HMDB0002434 HMDB0254943	Phenols Phenols Organooxygen compounds	C15571 C00530	Tyrosine metabolism Glycerolipid Metabolism | Riboflavin Metabolism NA	Glycerolipid Metabolism | Riboflavin Metabolism | Tyrosine metabolism	1.61504	1.2589	0.869538	0.694046	9.61794e-09	5.71225e-09	3.19327e-10	5.86945e-11	FALSE
111.055	positive	0.00726955	C5H6N2O	CHN2O_pos	4	4-imino-1H-pyridin-3-ol acetylimidazole 2-furoic acid hydrazide	HMDB0060741 HMDB0243814 HMDB0245134	Pyridines and derivatives Azoles Heteroaromatic compounds	C02560	NA NA NA		1.62799	1.34691	1.25967	1.41655	6.84967e-12	2.50104e-11	6.37535e-14	4.64159e-14	FALSE
111.063	positive	0.136294	[13C]C5H7NO	[13C]CHNO_pos	4							0.752664	1.25318	1.25699	-0.271809	0.00946153	0.00136497	0.166529	0.00859196	FALSE
111.079	positive											0.312236	1.11999	0.210445	-0.228247	0.680129	0.0721291	0.292966	0.014785	FALSE
111.08	positive	-0.0109018	C7H10O	CHO_pos	3	2,4-heptadienal cyclohexa-2,4-dien-1-ylmethanol cyclohexylidenemethanone	HMDB0243577 HMDB0250648 HMDB0250650	Organooxygen compounds Organooxygen compounds Organooxygen compounds		NA NA NA		1.31836	1.12638	0.529827	0.447109	1.0296e-06	3.49825e-07	2.925e-07	2.96464e-08	FALSE
111.082	positive											0.192492	0.932416	-0.448303	-0.234864	0.601478	0.0643009	0.4251	0.0211713	FALSE
111.085	positive	0.143536	[13C]C2H11NO3	[13C]CHNO3_pos	-1							0.784559	0.938579	1.64017	1.64269	0.0053152	0.000800659	2.35761e-06	2.0702e-07	TRUE
111.092	positive	0.139893	C6H10N2	CHN2_pos	3	3-propyl-1H-pyrazole	HMDB0245977	Azoles		NA		1.10885	0.828683	0.993536	0.988812	0.0779744	0.00960762	6.11554e-05	4.40875e-06	FALSE
111.108	positive											0.0596542	0.702739	-0.0888518	0.504967	0.774242	0.0813611	0.0120383	0.000679372	FALSE
111.117	positive	0.0308783	C8H14	CH_pos	2	1,7-octadiene	HMDB0244246	Unsaturated hydrocarbons		NA		0.878948	0.723658	0.429806	0.30005	1.33017e-05	3.44839e-06	0.000138977	9.59391e-06	FALSE
111.54	positive											0.383875	0.199617	1.26018	0.110444	0.164157	0.0192695	0.598947	0.0294662	FALSE
111.942	positive											0.820201	0.882626	1.49467	1.54239	0.0349994	0.00456294	1.20033e-08	1.55123e-09	FALSE
112.039	positive	-0.0432308	C5H5NO2	CHNO2_pos	4	minalin furamide 1-hydroxypyridin-2-one 2,3-dihydroxypyridine 4-hydroxy-1H-pyridin-2-one 1,3-dihydropyridine-2,4-dione 3-hydroxy-4-pyridone	HMDB0004230 HMDB0245133 HMDB0245310 HMDB0245397 HMDB0245452 HMDB0245487 HMDB0256965	Pyrroles Carboxylic acids and derivatives Pyridines and derivatives Pyridines and derivatives Pyridines and derivatives Pyridines and derivatives Pyridines and derivatives	C05942 C03927	NA NA NA NA NA NA NA		1.74357	1.11106	1.18304	1.24822	2.0169e-10	2.47805e-10	6.7387e-12	1.99724e-12	FALSE
112.043	positive											0.811553	1.33029	2.28073	2.90279	4.56195e-09	3.09597e-09	2.99947e-11	7.28654e-12	TRUE
112.046	positive											0.540799	0.816005	0.651737	1.07636	0.0459321	0.00586873	3.82191e-08	4.53543e-09	FALSE
112.047	positive	-0.095461	[13C]C5H6O2	[13C]CHO2_pos	4							0.788949	0.785492	0.71178	0.619698	1.09015e-06	3.67509e-07	4.28068e-05	3.14394e-06	FALSE
112.051	positive	-0.0738451	C4H5N3O	CHN3O_pos	4	2(1H)-pyrimidinone, 6-amino- 3H-imidazole-4-carboxamide 3-amino-1H-pyrazin-2-one imexon	HMDB0000630 HMDB0244880 HMDB0245823 HMDB0253411	Diazines Carboxylic acids and derivatives Diazines Diazines	C00380	NA NA NA NA		0.869528	0.89975	2.37931	1.22621	0.00546582	0.000820725	0.00228192	0.000137963	FALSE
112.052	positive											0.377021	0.47581	0.837078	0.700996	0.325577	0.0364596	0.0906932	0.00478828	FALSE
112.062	positive											0.952292	0.920831	2.91994	1.41339	0.000105835	2.23884e-05	1.19892e-05	9.48345e-07	FALSE
112.076	positive	-0.00180069	C6H9NO	CHNO_pos	3	N-vinylpyrrolidone	HMDB0255245 HMDB0256664	Pyrrolidines NA	C19548	NA NA		1.32916	1.01769	0.684841	0.53549	2.34885e-06	7.24481e-07	2.31664e-06	2.03791e-07	FALSE
112.084	positive	0.0360112	[13C]C6H10O	[13C]CHO_pos	3							0.84533	0.802094	0.407134	0.246722	5.20326e-05	1.17758e-05	0.00713206	0.000411398	FALSE
112.088	positive											0.327153	0.776555	-0.259608	1.12301	0.612042	0.065336	0.0028792	0.000172185	FALSE
112.112	positive	0.129607	C7H13N	CHN_pos	2	8-azabicyclo[3.2.1]octane pyrrolizidine quinuclidine	HMDB0247421 HMDB0257003 HMDB0257057	Tropane alkaloids Pyrrolizidines Quinuclidines		NA NA NA		1.27905	0.910899	0.579666	1.37517	0.0672304	0.00837535	2.79052e-05	2.10497e-06	FALSE
112.12	positive	-0.0125998	[13C]C7H14	[13C]CH_pos	2							0.990069	0.136997	0.160488	0.100041	0.142089	0.0168778	0.240874	0.0122633	FALSE
112.991	positive											1.33688	0.772904	2.64894	2.13076	0.000799524	0.000140333	4.09223e-06	3.46292e-07	TRUE
113.006	positive											1.44778	1.16178	-3.08439	-1.75338	0.000207884	4.12023e-05	9.15634e-05	6.44751e-06	TRUE
113.019	positive											0.510928	0.790044	1.13119	1.07854	0.0716132	0.00889356	3.91029e-05	2.88502e-06	FALSE
113.021	positive											0.663134	0.995137	0.240338	2.11875	0.639241	0.0680993	0.000243398	1.63598e-05	FALSE
113.023	positive	-0.00357092	C5H4O3	CHO3_pos	4	2,5-furandione, 3-methyl-	HMDB0250302	Dihydrofurans		NA		1.62757	0.83167	1.08186	1.03642	1.52696e-10	1.97928e-10	7.30367e-10	1.21698e-10	FALSE
113.027	positive											0.764805	1.01156	1.06713	1.15516	0.13142	0.0156716	0.000659629	4.20846e-05	FALSE
113.035	positive	-0.0339203	C4H4N2O2	CHN2O2_pos	4	uracil 1H-pyrazole-4-carboxylic acid stuntman	HMDB0000300 HMDB0060760 HMDB0256963	Diazines Azoles Diazines	C00106 C18474	beta-Alanine metabolism | Pyrimidine metabolism NA NA	beta-Alanine metabolism | Pyrimidine metabolism	1.49384	1.01683	1.35305	1.06805	4.58124e-13	9.50128e-12	1.35868e-09	2.13343e-10	FALSE
113.036	positive											0.368873	1.1521	1.03089	1.49593	7.57987e-06	2.0994e-06	1.12797e-08	1.47104e-09	FALSE
113.057	positive											0.882439	0.694813	1.81076	0.99414	0.0265518	0.00353177	0.0351073	0.00191097	FALSE
113.058	positive											0.419765	0.867728	0.697525	0.270793	0.336094	0.0374835	0.38006	0.0190141	FALSE
113.06	positive	0.0374825	C6H8O2	CHO2_pos	3	2,5-dimethyl-2H-furan-3-one 1,3 cyclohexanedione (2-methylidenecyclopropyl)acetic acid ethenyl but-2-enoate 1,2-dihydrobenzene-1,2-diol 2,4-hexadienoic acid 2-cyclopropylprop-2-enoic acid propenylacrylic acid	HMDB0032233 HMDB0244161 HMDB0244327 HMDB0245043 HMDB0246048 HMDB0253115 HMDB0254638 HMDB0256823	Dihydrofurans Organooxygen compounds Carboxylic acids and derivatives Fatty Acyls Organooxygen compounds Fatty Acyls Carboxylic acids and derivatives Fatty Acyls	C01066	NA NA NA NA NA NA NA NA		1.02503	1.16676	0.435422	0.515492	5.459e-05	1.22902e-05	8.75145e-08	9.63103e-09	FALSE
113.061	positive											0.563408	0.546332	0.798849	0.564752	0.0772004	0.00952583	0.0160387	0.000895542	FALSE
113.071	positive	-0.0820962	C5H8N2O	CHN2O_pos	3							1.06996	1.3542	1.35146	1.53458	1.23719e-10	1.67049e-10	3.68659e-15	6.57194e-15	FALSE
113.079	positive	0.0446143	[13C]C5H9NO	[13C]CHNO_pos	3							0.891906	0.881238	0.29367	0.504102	0.113289	0.013638	0.210414	0.0107577	FALSE
113.096	positive	-0.0107058	C7H12O	CHO_pos	2	2-heptenal, (2E)-	HMDB0033827	Organooxygen compounds		NA		1.09668	1.65473	0.699471	0.728369	1.32867e-07	5.68398e-08	9.80964e-13	3.95061e-13	FALSE
113.107	positive	-0.130241	C6H12N2	CHN2_pos	2	dabco	HMDB0244208	Diazinanes		NA		0.9198	1.23969	1.2579	3.11643	8.45808e-11	1.27855e-10	6.39353e-06	5.25621e-07	FALSE
113.132	positive	-0.0588628	C8H16	CH_pos	1	cyclooctane octan-1-ylium-8-ide	HMDB0250661 HMDB0255214	Saturated hydrocarbons		NA NA		0.998374	0.807399	0.308358	0.457358	0.0987883	0.0120011	6.39519e-05	4.60077e-06	FALSE
113.964	positive											0.868672	1.16262	1.09452	1.38742	7.64194e-07	2.69725e-07	1.21809e-09	1.93523e-10	FALSE
113.979	positive											1.12719	0.657153	1.54802	1.06755	0.105912	0.0128125	0.00855267	0.000489269	FALSE
114.019	positive	0.0053092	C4H3NO3	CHNO3_pos	4	nitrofuran	HMDB0245258	Furans	C14414	NA		1.1712	1.47218	1.30956	1.69916	1.64932e-05	4.18372e-06	7.40382e-09	9.99439e-10	FALSE
114.027	positive	0.0424706	[13C]C4H4O3	[13C]CHO3_pos	4							0.442653	1.01412	0.924273	1.71055	0.180577	0.0210162	1.78169e-06	1.59335e-07	FALSE
114.03	positive	0.152182	C3H3N3O2	CHN3O2_pos	4	oxaidin nitroimidazole 2-nitroimidazole 3-nitro-2H-pyrazole 1H-imidazole, 5-nitro- 1,2,4-triazine-3,5-diol	HMDB0244186 HMDB0244881 HMDB0245259 HMDB0245943 HMDB0246535 HMDB0247036	Triazines Azoles Allyl-type 1,3-dipolar organic compounds Allyl-type 1,3-dipolar organic compounds Azoles Triazines	C14531	NA NA NA NA NA NA		0.771718	0.994237	1.38308	1.56538	0.00122636	0.000207931	1.73192e-06	1.55228e-07	FALSE
114.044	positive											0.777838	0.798472	1.5104	1.14658	2.86078e-06	8.64384e-07	1.64141e-12	6.02948e-13	FALSE
114.055	positive	-0.04246	C5H7NO2	CHNO2_pos	3	2,3-dihydro-1H-pyrrole-2-carboxylic acid 2,5-dihydro-1H-pyrrole-2-carboxylic acid 5-oxopyrrolidine-2-carbaldehyde (prop-2-yn-1-ylamino)acetic acid propargylglycine glutarimide N-methylsuccinimide 1-methylpyrrole-2,5-diol	HMDB0244902 HMDB0245496 HMDB0246837 HMDB0246989 HMDB0251529 HMDB0252816 HMDB0255192 HMDB0255337	Carboxylic acids and derivatives Carboxylic acids and derivatives Pyrrolidines Carboxylic acids and derivatives Carboxylic acids and derivatives Pyridines and derivatives Carboxylic acids and derivatives Pyrroles	C07275	NA NA NA NA NA NA NA NA		2.10744	1.6516	1.14939	1.03196	8.75329e-11	1.29302e-10	3.62849e-15	6.5649e-15	FALSE
114.063	positive	-0.00530711	[13C]C5H8O2	[13C]CHO2_pos	3							1.10534	0.695833	0.368606	0.41363	0.000385198	7.21796e-05	0.000405908	2.65683e-05	FALSE
114.091	positive	-0.0017686	C6H11NO	CHNO_pos	2	2-pyrrolidinone, 1-ethyl- 1-isocyano-2-methoxy-2-methylpropane 2,2-dimethyl-3,4-dihydropyrrol-1-ium-1-olate cyclohexanone oxime 1-isocyano-1-methoxy-2-methylpropane N-isopropylprop-2-enimidic acid	HMDB0243878 HMDB0244336 HMDB0246162 HMDB0250654 HMDB0254551 HMDB0255163	Pyrrolidines Organonitrogen compounds Pyrrolines Organonitrogen compounds Organonitrogen compounds Carboxylic acids and derivatives		NA NA NA NA NA NA		0.871016	1.16665	0.858993	0.847202	2.87675e-08	1.50208e-08	1.81503e-10	3.54299e-11	FALSE
114.099	positive	0.0353694	[13C]C6H12O	[13C]CHO_pos	2							0.96284	1.134	0.46435	0.775635	0.000662035	0.000118365	2.41664e-10	4.57372e-11	FALSE
114.128	positive	0.0388966	C7H15N	CHN_pos	1	N-ethylpiperidine (aminomethyl)cyclohexane	HMDB0243877 HMDB0250653	Piperidines Organonitrogen compounds		NA NA		0.769137	1.02976	1.28235	2.13061	6.35745e-05	1.40926e-05	5.98014e-12	1.80552e-12	FALSE
114.136	positive	-0.0123753	[13C]C7H16	[13C]CH_pos	1							1.053	0.200614	-0.0421163	0.13005	0.944881	0.0973977	0.561065	0.0276418	FALSE
114.961	positive											0.519994	0.593032	0.618342	0.420556	0.30956	0.0347938	0.111982	0.00587513	FALSE
114.984	positive											1.42394	0.880812	1.32842	1.85317	3.25128e-05	7.68346e-06	2.81725e-09	4.14453e-10	FALSE
114.99	positive											0.666192	0.530393	1.4781	0.876589	0.162747	0.019117	0.0744183	0.00395313	FALSE
115.007	positive											1.23331	0.81671	1.3148	1.01904	3.65188e-07	1.39945e-07	5.39146e-13	2.42958e-13	FALSE
115.014	positive	-0.336823	C3H2N2O3	CHN2O3_pos	4							1.0062	0.751287	0.897977	1.22015	0.00739655	0.00108733	0.00127024	7.86209e-05	FALSE
115.018	positive											1.20785	1.33659	1.26622	1.20153	7.93347e-10	7.35853e-10	5.40221e-12	1.65369e-12	FALSE
115.037	positive											0.691597	1.23847	0.65114	1.11901	0.00133184	0.000224057	6.59129e-10	1.10818e-10	FALSE
115.039	positive	-0.0035078	C5H6O3	CHO3_pos	3	glutaric anhydride ethane-1,1,2-tricarbaldehyde	HMDB0252815 HMDB0257799	Lactones Organooxygen compounds		NA NA		0.989321	1.00209	0.886769	0.703969	3.01551e-08	1.55883e-08	1.4261e-10	2.85034e-11	FALSE
115.05	positive	0.0543655	C4H6N2O2	CHN2O2_pos	3	dihydrouracil 1-methylhydantoin 2-amino-3-cyanopropanoic acid muscimol piperazine-2,3-dione	HMDB0000076 HMDB0003646 HMDB0245844 HMDB0254955 HMDB0256573	Diazines Azolines Carboxylic acids and derivatives Organonitrogen compounds Carboxylic acids and derivatives	C00429 C02565 C08311	beta-Alanine metabolism | Pyrimidine metabolism NA NA NA NA	beta-Alanine metabolism | Pyrimidine metabolism	1.52968	1.14539	1.36814	1.15753	1.38561e-11	3.88337e-11	1.3695e-11	3.64862e-12	FALSE
115.054	positive	0.0298123	C9H6	CH_pos	7							1.11981	0.632829	0.673046	0.358057	0.00699888	0.00103592	4.38522e-06	3.69666e-07	FALSE
115.058	positive	0.178867	[13C]C4H7NO2	[13C]CHNO2_pos	3							1.40393	0.72875	1.32	1.10801	7.80814e-06	2.15113e-06	0.000939446	5.88985e-05	FALSE
115.074	positive											1.21916	0.666092	0.991631	0.834223	0.0244781	0.00326851	8.59233e-05	6.08038e-06	FALSE
115.075	positive	0.0368201	C6H10O2	CHO2_pos	2	2-methylidenepentanoic acid 2-methylpentanedial glutaraldehyde, 3-methyl- 4-oxohexanal 2-[(prop-2-en-1-yloxy)methyl]oxirane cyclopentanecarboxylic acid ethyl methacrylate vinyl butyrate	HMDB0245232 HMDB0245235 HMDB0245506 HMDB0245934 HMDB0246562 HMDB0248167 HMDB0250667 HMDB0252052 HMDB0259821	Fatty Acyls Organooxygen compounds NA Organooxygen compounds Organooxygen compounds Epoxides Carboxylic acids and derivatives Carboxylic acids and derivatives Fatty Acyls		NA NA NA NA NA NA NA NA NA		1.26081	1.5113	0.746703	0.801122	1.39375e-07	5.91844e-08	7.65116e-13	3.24294e-13	FALSE
115.077	positive											0.644756	0.726204	0.71615	0.884726	0.0334196	0.00437126	1.63415e-05	1.26617e-06	FALSE
115.087	positive	-0.0806456	C5H10N2O	CHN2O_pos	2	4-nitrosopiperidine N-nitrosopiperidine pyrrolidine-2-carboxamide	HMDB0061162 HMDB0243970 HMDB0253910	Piperidines Piperidines Carboxylic acids and derivatives	C19284	NA NA NA		1.25996	1.10714	0.870398	2.04417	0.000214953	4.24251e-05	1.06451e-09	1.71369e-10	FALSE
115.095	positive	0.043826	[13C]C5H11NO	[13C]CHNO_pos	2							0.727185	1.03185	0.800315	0.985277	7.92664e-08	3.59884e-08	2.61421e-07	2.67085e-08	FALSE
115.112	positive	-0.0105167	C7H14O	CHO_pos	1	propyl ketone heptanal	HMDB0004814 HMDB0031475	Organooxygen compounds Organooxygen compounds	C14390	NA NA		0.689139	1.00867	0.803204	0.725468	7.73822e-09	4.74253e-09	3.44444e-09	4.96183e-10	FALSE
115.963	positive											0.804473	1.08097	2.08928	2.42717	0.0091874	0.00132838	3.93932e-09	5.60479e-10	TRUE
115.97	positive											1.02131	0.534271	1.04174	0.236819	3.01738e-08	1.55825e-08	0.541745	0.0267443	FALSE
115.982	positive											0.713536	1.40582	2.12049	1.96445	4.53898e-05	1.03903e-05	4.58453e-08	5.34109e-09	TRUE
115.984	positive											1.30419	0.865045	1.1412	1.43119	5.32077e-09	3.49653e-09	2.03007e-05	1.55998e-06	FALSE
115.998	positive											0.687255	0.570953	2.33355	1.39345	0.0673463	0.00838577	0.0132939	0.000747272	FALSE
116.016	positive											0.690366	0.898253	0.752499	1.18436	0.00125437	0.000212126	3.69481e-08	4.40184e-09	FALSE
116.03	positive											0.789352	0.825338	1.7238	1.9145	4.39131e-07	1.64275e-07	6.33917e-11	1.41387e-11	TRUE
116.034	positive	0.00521617	C4H5NO3	CHNO3_pos	3	4-oxoazetidine-2-carboxylic acid 3-carbamoylprop-2-enoic acid N-hydroxysuccinimide pyrrole-1,2,5-triol	HMDB0246560 HMDB0254310 HMDB0255159 HMDB0255335	Lactams Fatty Acyls Pyrrolidines Pyrroles		NA NA NA NA		1.16233	1.33713	1.19842	0.896471	7.18173e-10	6.79498e-10	1.15093e-11	3.14936e-12	FALSE
116.04	positive											0.693742	0.826048	0.872895	1.25315	0.133997	0.0159568	0.000114551	7.98499e-06	FALSE
116.042	positive	0.215586	[13C]C4H6O3	[13C]CHO3_pos	3							0.700639	0.718859	0.772976	0.594071	0.001335	0.000224516	0.0090655	0.00051702	FALSE
116.049	positive											0.665813	0.505907	1.36137	1.06115	3.19417e-09	2.32604e-09	5.47768e-13	2.45929e-13	FALSE
116.053	positive											0.496081	0.332506	0.883959	1.00866	0.038039	0.00492577	3.64082e-09	5.23229e-10	FALSE
116.058	positive	-0.446761	[13C]C8H6	[13C]CH_pos	7							0.541016	0.121867	0.407172	0.0270572	0.305806	0.0343941	0.8506	0.0411208	FALSE
116.062	positive											1.41589	0.382248	1.15477	0.395481	1.64626e-05	4.18006e-06	0.00435029	0.00025618	FALSE
116.071	positive	-0.0417162	C5H9NO2	CHNO2_pos	2	L-proline 5-(hydroxymethyl)pyrrolidin-2-one 5-hydroxy-1-methylpyrrolidin-2-one allylglycine proline N-(2-hydroxyethyl)prop-2-enimidic acid (prop-2-en-1-ylamino)acetic acid	HMDB0000162 HMDB0246731 HMDB0246801 HMDB0251510 HMDB0251528 HMDB0254987 HMDB0255080	Carboxylic acids and derivatives Pyrrolidines Pyrrolidines Carboxylic acids and derivatives Carboxylic acids and derivatives Organonitrogen compounds Carboxylic acids and derivatives	C00148 C16435	Arginine and proline metabolism NA NA NA NA NA NA	Arginine and proline metabolism	1.41238	1.17234	1.06004	1.1101	1.63442e-09	1.34512e-09	3.75653e-16	1.46893e-15	FALSE
116.079	positive	-0.00521415	[13C]C5H10O2	[13C]CHO2_pos	2							1.22676	1.38339	0.725989	0.821744	1.25021e-07	5.38834e-08	1.17206e-11	3.19636e-12	FALSE
116.082	positive	-0.85336	C4H9N3O	CHN3O_pos	2	N-nitrosopiperazine	HMDB0243969	Diazinanes		NA		0.972759	1.07539	2.20439	1.38765	9.66875e-05	2.06727e-05	3.73511e-09	5.35193e-10	FALSE
116.107	positive	-0.00173762	C6H13NO	CHNO_pos	1	2-amino-4-methylpentanal epolamine 2-amino-3-methylpentanal	HMDB0244989 HMDB0245748 HMDB0257959	Organonitrogen compounds Pyrrolidines Organonitrogen compounds		NA NA NA		1.69705	1.2241	0.865597	0.73925	7.65331e-08	3.50544e-08	7.57975e-13	3.22394e-13	FALSE
116.115	positive	-0.052125	[13C]C6H14O	[13C]CHO_pos	1							0.374119	0.58104	0.50594	0.671262	0.00461143	0.000701578	1.67345e-05	1.29539e-06	FALSE
116.143	positive	0.0382156	C7H17N	CHN_pos	0	methylhexanamine heptylamine	HMDB0244169 HMDB0253108	Organonitrogen compounds Organonitrogen compounds		NA NA		0.547754	0.351446	1.95573	1.01865	0.00532555	0.000801521	0.0104475	0.000592907	FALSE
116.546	positive											0.700419	0.792289	0.404463	1.4087	0.316361	0.0354966	2.9665e-11	7.22091e-12	FALSE
116.551	positive											0.572101	0.366731	1.3373	1.07817	1.86643e-07	7.68036e-08	1.3453e-10	2.70894e-11	FALSE
116.947	positive											1.00338	0.90037	1.26179	1.36953	7.6992e-06	2.12677e-06	1.46108e-12	5.48338e-13	FALSE
116.952	positive											0.53865	1.24488	1.32965	1.07541	7.22038e-05	1.58095e-05	5.71722e-06	4.73554e-07	FALSE
116.966	positive											1.6343	1.13192	1.0377	0.922639	7.47078e-10	6.99191e-10	2.29815e-08	2.82969e-09	FALSE
116.986	positive											0.926433	1.17028	1.5121	2.47989	3.78518e-06	1.11637e-06	1.27401e-10	2.59994e-11	TRUE
116.997	positive	0.208639	C7O2	CHO2_pos	8							0.348041	0.573907	1.12407	1.40634	0.0155857	0.00215092	6.32034e-06	5.20134e-07	FALSE
117.014	positive											0.873011	0.767237	1.43355	1.27384	1.01905e-05	2.72634e-06	1.95888e-11	4.95735e-12	FALSE
117.018	positive	0.0430994	C4H4O4	CHO4_pos	3	fumaric acid maleic acid 1,4-dioxane-2,5-dione butenedioic acid	HMDB0000134 HMDB0000176 HMDB0244217 HMDB0249450	Carboxylic acids and derivatives Carboxylic acids and derivatives Dioxanes Carboxylic acids and derivatives	C00122 C01384	Arginine and proline metabolism | Aspartate Metabolism | Citric Acid Cycle | Oxidative phosphorylation | Phenylalanine and Tyrosine Metabolism | Purine metabolism | Tyrosine metabolism | Urea Cycle NA NA NA	Arginine and proline metabolism | Aspartate Metabolism | Citric Acid Cycle | Oxidative phosphorylation | Phenylalanine and Tyrosine Metabolism | Purine metabolism | Tyrosine metabolism | Urea Cycle	0.606962	0.442712	0.882289	0.497436	0.00896175	0.0013001	0.00773496	0.000444063	FALSE
117.029	positive	-0.244781	C3H4N2O3	CHN2O3_pos	3	4,5-dihydroxy-1,2-dihydropyrazol-3-one	HMDB0256948	Azolines		NA		0.990957	0.890061	1.162	1.4776	0.000660326	0.0001181	6.47516e-07	6.19269e-08	FALSE
117.039	positive											0.676004	0.371545	-0.797321	0.610963	0.371318	0.0411113	0.0958493	0.00504951	FALSE
117.04	positive											1.89593	0.810314	1.23495	1.19806	1.83104e-10	2.28215e-10	6.38122e-12	1.90761e-12	FALSE
117.044	positive											0.381795	0.624723	1.92312	1.59315	0.037792	0.00489501	8.30467e-06	6.71804e-07	TRUE
117.047	positive											0.684536	0.429253	2.27158	1.07349	2.94609e-05	7.03924e-06	4.00749e-07	3.97375e-08	FALSE
117.051	positive											0.558794	0.366059	1.39434	1.04901	0.00022682	4.45974e-05	6.15199e-07	5.90692e-08	FALSE
117.052	positive											0.681869	0.720215	2.10683	1.42182	0.00195899	0.000317709	3.01737e-07	3.05061e-08	FALSE
117.055	positive	-0.00344687	C5H8O3	CHO3_pos	2	α-ketoisovalerate levulinic acid α-oxopentanoic acid (2R)-2-methyl-3-oxobutanoic acid 3-oxopentanoic acid	HMDB0000019 HMDB0000720 HMDB0001865 HMDB0003771 HMDB0245963	Keto acids and derivatives Keto acids and derivatives Keto acids and derivatives Keto acids and derivatives Keto acids and derivatives	C00141 C06255 C02233	Valine, leucine and isoleucine degradation NA NA NA NA	Valine, leucine and isoleucine degradation	1.06836	1.67411	1.02259	1.08769	4.37846e-09	2.98708e-09	3.14008e-14	2.75828e-14	FALSE
117.057	positive											1.94828	0.890324	2.11375	1.69836	3.50876e-11	7.05136e-11	1.70171e-13	9.98946e-14	TRUE
117.066	positive	-0.0327421	C4H8N2O2	CHN2O2_pos	2	diacetylhydrazine 1-nitrosopyrrolidin-3-ol 2,3-dinitrosobutane 3-amino-1-hydroxypyrrolidin-2-one 2,3-butanedione oxime N-nitrosomorpholine 3-amino-4-oxobutanamide succinamide	HMDB0060496 HMDB0061163 HMDB0245409 HMDB0245803 HMDB0249176 HMDB0255208 HMDB0258109 HMDB0258539	Organonitrogen compounds Pyrrolidines Organonitrogen compounds Carboxylic acids and derivatives Organonitrogen compounds Oxazinanes Carboxylic acids and derivatives Fatty Acyls	C16622 C19283	NA NA NA NA NA NA NA NA		1.0399	1.03865	0.871651	1.2278	0.00017001	3.43926e-05	6.5451e-10	1.10271e-10	FALSE
117.07	positive	0.0292945	C9H8	CH_pos	6	indene	HMDB0253451	Indenes and isoindenes		NA		1.22868	1.21555	0.609424	0.486767	1.34762e-05	3.49188e-06	1.43018e-08	1.82396e-09	FALSE
117.073	positive											0.356524	1.42298	-0.621868	0.959799	0.126317	0.0151082	9.51654e-06	7.6347e-07	FALSE
117.074	positive	0.175761	[13C]C4H9NO2	[13C]CHNO2_pos	2							0.986551	0.994123	1.68524	1.83419	0.000348816	6.60544e-05	1.61981e-08	2.055e-09	TRUE
117.08	positive											1.21906	0.638496	-0.0422579	0.740586	0.931546	0.096176	6.1094e-05	4.40563e-06	FALSE
117.089	positive											0.737677	0.952548	2.1967	1.12762	0.00122836	0.000208134	0.0162685	0.000907955	FALSE
117.091	positive	0.0361808	C6H12O2	CHO2_pos	1	1,2-cyclohexanediol 2,2-dimethyl butyric acid butoxyacetaldehyde sec-butyl acetate tert-butyl acetate	HMDB0000535 HMDB0244061 HMDB0245333 HMDB0249469 HMDB0258198 HMDB0258840	Fatty Acyls Organooxygen compounds Fatty Acyls Organooxygen compounds Carboxylic acids and derivatives Carboxylic acids and derivatives	C01585	Biosynthesis of unsaturated fatty acids NA NA NA NA NA	Biosynthesis of unsaturated fatty acids	1.09347	0.669624	0.967798	0.770301	2.11743e-07	8.58378e-08	2.36713e-10	4.48352e-11	FALSE
117.093	positive											0.591579	0.827759	1.55033	1.05375	0.0969267	0.011797	0.0375175	0.00203942	FALSE
117.102	positive	0.00689091	C5H12N2O	CHN2O_pos	1							1.19366	0.675478	0.889134	1.26227	2.97094e-07	1.16786e-07	8.0251e-12	2.30797e-12	FALSE
117.11	positive	0.0430652	[13C]C5H13NO	[13C]CHNO_pos	1							0.833598	0.936461	0.838482	1.25624	9.97946e-06	2.67541e-06	3.18855e-06	2.7403e-07	FALSE
117.946	positive											0.677041	0.974396	1.08807	1.71672	0.0428038	0.00549883	2.39566e-09	3.56105e-10	FALSE
117.959	positive											0.869458	0.979035	1.73392	2.14195	3.02362e-08	1.55991e-08	5.01487e-10	8.70302e-11	TRUE
117.966	positive											0.234882	1.51677	0.594275	1.74655	0.438689	0.0480167	1.3178e-05	1.03562e-06	FALSE
117.981	positive											1.00185	0.9636	1.52004	2.11624	1.84116e-06	5.8458e-07	1.12696e-07	1.21594e-08	TRUE
118.013	positive											0.799045	0.873025	1.48676	1.59906	0.00152336	0.000252508	8.70817e-05	6.15696e-06	FALSE
118.04	positive											0.548557	0.893127	1.1453	1.65755	0.0281402	0.00372488	7.59665e-08	8.48339e-09	FALSE
118.045	positive											0.542887	0.374452	1.59679	1.23295	1.64889e-05	4.18468e-06	9.89381e-08	1.0766e-08	FALSE
118.046	positive											0.510803	0.977126	0.456361	0.788594	0.408381	0.0449748	0.0574697	0.00307844	FALSE
118.05	positive	0.00512634	C4H7NO3	CHNO3_pos	2	aceturate 2-amino-3-carboxypropanoyl 3-carbamoylpropanoic acid	HMDB0000532 HMDB0243609 HMDB0258538	Carboxylic acids and derivatives Carboxylic acids and derivatives Fatty Acyls		NA NA NA		1.08855	1.5793	1.28877	1.08985	1.0935e-11	3.39501e-11	1.13654e-10	2.34706e-11	FALSE
118.058	positive	0.126441	[13C]C4H8O3	[13C]CHO3_pos	2							1.04557	1.24029	1.0905	1.59105	1.76445e-05	4.43456e-06	3.28635e-10	6.00866e-11	FALSE
118.065	positive	-0.0478396	C8H7N	CHN_pos	6	indole 2H-isoindole	HMDB0000738 HMDB0245764	Indoles and derivatives Isoindoles and derivatives	C00463	NA NA		2.14608	1.08174	2.01628	1.5172	8.61764e-18	4.46815e-15	1.19796e-15	3.49923e-15	TRUE
118.073	positive	-0.439069	[13C]C8H8	[13C]CH_pos	6							0.490953	0.379473	-0.129912	-0.24452	0.769931	0.0809573	0.385064	0.0192526	FALSE
118.086	positive	-0.040998	C5H11NO2	CHNO2_pos	1	L-valine 5-aminovaleric acid D-(-)-norvaline amyl nitrite 3-amino-2,2-dimethylpropanoic acid 3-amino-3-methylbutanoic acid valin Nva tert-butyl carbamate	HMDB0000883 HMDB0003355 HMDB0013716 HMDB0015550 HMDB0245805 HMDB0245806 HMDB0250806 HMDB0251527 HMDB0258841	Carboxylic acids and derivatives Carboxylic acids and derivatives Carboxylic acids and derivatives Organonitrogen compounds Carboxylic acids and derivatives Carboxylic acids and derivatives Carboxylic acids and derivatives Carboxylic acids and derivatives Carboxylic acids and derivatives	C00183 C00431 C01799 C07457 C16436	Propanoate metabolism | Valine, leucine and isoleucine degradation NA NA NA NA NA NA NA NA	Propanoate metabolism | Valine, leucine and isoleucine degradation	1.49247	1.51367	0.969737	1.13592	8.18344e-10	7.57682e-10	7.71903e-17	5.84817e-16	FALSE
118.094	positive	-0.0905309	[13C]C5H12O2	[13C]CHO2_pos	1							1.25361	0.65663	0.858321	0.773974	1.12205e-05	2.9652e-06	3.72263e-10	6.70022e-11	FALSE
118.097	positive	-1.86352	C4H11N3O	CHN3O_pos	1							0.866792	0.482666	1.14811	1.16967	0.142156	0.0168818	4.0009e-05	2.9456e-06	FALSE
118.106	positive	0.051239	[13C]C4H12N2O	[13C]CHN2O_pos	1							1.09454	0.626894	0.888088	1.30333	2.70666e-07	1.07373e-07	3.68281e-05	2.72797e-06	FALSE
118.123	positive	0.169064	C6H15NO	CHNO_pos	0	1-(diethylamino)ethanol N,N-diethylethanamine oxide	HMDB0247953 HMDB0259192	Organonitrogen compounds Organonitrogen compounds		NA NA		1.10658	0.880764	1.93305	1.69797	5.27811e-05	1.19192e-05	1.30925e-08	1.68391e-09	TRUE
118.943	positive											1.37972	1.16014	1.08083	1.02581	1.2305e-08	7.15248e-09	2.03343e-14	1.9959e-14	FALSE
118.963	positive											0.803965	1.13996	0.78658	1.27389	0.00128148	0.000216357	0.00344504	0.000204611	FALSE
118.972	positive											1.27387	0.51185	2.61856	1.85108	6.73084e-05	1.48001e-05	8.39294e-07	7.88376e-08	TRUE
118.99	positive											0.731535	0.871423	3.20495	1.02458	0.00532968	0.000801909	0.000788253	4.98319e-05	FALSE
119.009	positive											1.39108	0.937817	1.27856	1.46735	1.48957e-08	8.39483e-09	2.65718e-12	9.11191e-13	FALSE
119.019	positive											0.94256	1.07793	2.98787	2.27014	0.00131778	0.000222051	7.76558e-06	6.31354e-07	TRUE
119.028	positive											1.44247	0.8932	1.17651	1.1086	2.09697e-09	1.64986e-09	0.000477969	3.1017e-05	FALSE
119.034	positive	0.0423633	C4H6O4	CHO4_pos	2	methylmalonic acid succinic acid	HMDB0000202 HMDB0000254	Carboxylic acids and derivatives Carboxylic acids and derivatives	C02170 C00042	Propanoate metabolism | Valine, leucine and isoleucine degradation Arginine and proline metabolism | Butyrate Metabolism | Citric Acid Cycle | Glutamate Metabolism | Ketone Body Metabolism | Oxidative phosphorylation | Valine, leucine and isoleucine degradation	Arginine and proline metabolism | Butyrate Metabolism | Citric Acid Cycle | Glutamate Metabolism | Ketone Body Metabolism | Oxidative phosphorylation | Valine, leucine and isoleucine degradation | Propanoate metabolism | Valine, leucine and isoleucine degradation	0.768982	0.49679	1.09201	0.890951	1.19423e-08	6.95724e-09	1.83706e-06	1.63983e-07	FALSE
119.036	positive											0.236719	0.776689	0.377967	0.880908	0.531337	0.0574421	0.00996188	0.000566543	FALSE
119.037	positive											0.620327	0.841118	1.21418	1.6179	0.0151507	0.00209703	4.67242e-06	3.92104e-07	FALSE
119.045	positive	0.013555	C3H6N2O3	CHN2O3_pos	2	carbamoylamino acetate	HMDB0259713	Carboxylic acids and derivatives		NA		1.08568	1.16897	1.39033	1.30003	2.69609e-11	6.10434e-11	5.90169e-11	1.3236e-11	FALSE
119.049	positive	-0.0101659	C8H6O	CHO_pos	6							0.880382	0.914467	0.558594	0.589325	0.000197933	3.93958e-05	5.285e-09	7.33431e-10	FALSE
119.052	positive											0.462369	0.642301	0.79167	1.36304	0.0295914	0.00390105	1.52919e-09	2.37501e-10	FALSE
119.054	positive											0.437294	0.977316	1.01343	1.13246	7.09205e-05	1.55482e-05	3.89462e-09	5.55096e-10	FALSE
119.06	positive	0.299865	C7H6N2	CHN2_pos	6	indazole benzimidazole imidazo[1,2-a]pyridine	HMDB0244884 HMDB0248993 HMDB0253414	Benzopyrazoles Benzimidazoles Imidazopyridines	C02009	NA NA NA		0.686174	0.857629	0.86832	-0.62734	0.0169524	0.00232161	0.00421379	0.000248443	FALSE
119.062	positive											1.5927	0.894915	2.37156	1.90389	1.65126e-12	1.0441e-11	9.81533e-12	2.74469e-12	TRUE
119.068	positive	-0.00338807	[13C]C7H7N	[13C]CHN_pos	6							2.11602	1.07411	2.05139	1.58056	1.13875e-17	1.96809e-15	1.54776e-15	4.26411e-15	TRUE
119.07	positive	-0.0880886	C5H10O3	CHO3_pos	1	2-ethylhydracrylic acid 2-hydroxyisovaleric acid β-hydroxyvaleric acid 3-hydroxyisovaleric acid pentanoic acid, 2-hydroxy- 2-hydroxy-2-methylbutyric acid 4-hydroxyisopentanoate 2-methoxyethyl acetate ethyl 3-hydroxypropanoate	HMDB0000396 HMDB0000407 HMDB0000531 HMDB0000754 HMDB0001863 HMDB0001987 HMDB0002011 HMDB0245204 HMDB0252030	Fatty Acyls Fatty Acyls Fatty Acyls Fatty Acyls Fatty Acyls Fatty Acyls Fatty Acyls Carboxylic acids and derivatives Hydroxy acids and derivatives		NA NA NA NA NA NA NA NA NA		1.15008	0.670759	0.993035	0.561634	1.32248e-08	7.5851e-09	1.19666e-06	1.09977e-07	FALSE
119.071	positive											1.40993	1.02894	2.47181	2.27496	4.49767e-08	2.19378e-08	2.33279e-12	8.20848e-13	TRUE
119.081	positive	-0.116876	C4H10N2O2	CHN2O2_pos	1	2,4-diaminobutyric acid 2-[ethyl(nitroso)amino]ethanol 3-(methylamino)-(DL)-alanine diaminobutyric acid, L- 2-amino-2-(methylamino)propanoic acid α-amino-α-aminobutyric acid	HMDB0002362 HMDB0006284 HMDB0244541 HMDB0244715 HMDB0246410 HMDB0248238 HMDB0251135	Carboxylic acids and derivatives Carboxylic acids and derivatives Organonitrogen compounds Carboxylic acids and derivatives Fatty Acyls Carboxylic acids and derivatives Carboxylic acids and derivatives	C03283	NA NA NA NA NA NA NA		0.979397	0.748809	1.37245	0.993288	0.000227314	4.46608e-05	2.11156e-06	1.86495e-07	FALSE
119.086	positive	0.0287945	C9H10	CH_pos	5	P-methylstyrene β-methylstyrene	HMDB0246518 HMDB0249142	Benzene and substituted derivatives Benzene and substituted derivatives		NA NA		0.300285	1.27089	0.227957	0.492614	0.161412	0.0189688	7.38093e-08	8.28063e-09	FALSE
119.09	positive	-0.165986	[13C]C4H11NO2	[13C]CHNO2_pos	1							0.788439	1.02443	1.04444	1.79607	1.96979e-05	4.91725e-06	3.2071e-09	4.66428e-10	FALSE
119.095	positive											1.12067	0.33202	1.26283	0.896614	3.85463e-05	8.96627e-06	3.04416e-06	2.62458e-07	FALSE
119.098	positive											0.914647	0.342758	1.77505	0.902532	0.00173624	0.00028488	5.60209e-06	4.64811e-07	FALSE
119.107	positive	0.0355633	C6H14O2	CHO2_pos	0	1-isopropoxy-2-propanol 2-methylpentane-1,3-diol hexane-1,1-diol	HMDB0243911 HMDB0245212 HMDB0253145	Organooxygen compounds Organooxygen compounds Fatty Acyls		NA NA NA		1.30722	0.783992	0.650223	1.00346	0.000738445	0.000130987	1.04285e-09	1.68217e-10	FALSE
119.943	positive											0.81648	0.888897	1.31669	1.38262	0.00253775	0.000402754	9.67046e-11	2.02638e-11	FALSE
119.96	positive											1.24229	0.340965	2.98875	1.06969	0.00187264	0.000304754	0.0102263	0.000580761	FALSE
119.997	positive											0.813106	1.23742	1.83936	1.75804	9.1733e-05	1.97028e-05	7.39445e-11	1.60782e-11	TRUE
120.005	positive											0.692758	0.75326	1.29378	1.3459	0.00808543	0.00118257	2.60175e-06	2.26326e-07	FALSE
120.024	positive											1.20752	0.922205	2.2317	2.70809	1.02458e-07	4.48678e-08	0.000324851	2.1489e-05	TRUE
120.029	positive											0.714592	1.902	1.07866	1.49185	0.00101163	0.00017397	9.81191e-09	1.29919e-09	FALSE
120.044	positive	-0.00168015	C7H5NO	CHNO_pos	6	benzisoxazole benzoxazole furo[3,2-b]pyridine	HMDB0244058 HMDB0249037 HMDB0252540	Benzisoxazoles Benzoxazoles Furopyridines		NA NA NA		1.08794	0.39338	1.12558	0.163026	7.73291e-07	2.7275e-07	0.153361	0.00794639	FALSE
120.052	positive	-0.134403	[13C]C7H6O	[13C]CHO_pos	6							0.574973	0.499783	0.532256	0.598201	0.348005	0.0386788	0.0449246	0.00242628	FALSE
120.056	positive	-0.0302398	C6H5N3	CHN3_pos	6	benzotriazole 1H-pyrazolo[4,3-b]pyridine 3H-imidazo[4,5-b]pyridine 5H-pyrrolo[2,3-b]pyrazine 5H-pyrrolo[3,2-d]pyrimidine imidazo[1,2-b]pyridazine pyrazolopyrimidine	HMDB0244873 HMDB0244900 HMDB0246267 HMDB0247025 HMDB0247026 HMDB0253415 HMDB0256950	Benzotriazoles Pyrazolopyridines Imidazopyridines Pyrrolopyrazines Pyrrolopyrimidines Diazines Pyrazolopyrimidines		NA NA NA NA NA NA NA		0.98548	1.16279	1.95501	1.53239	0.000334471	6.35935e-05	1.30938e-07	1.39722e-08	TRUE
120.057	positive											0.383217	0.888629	-0.903961	0.108016	0.220366	0.0253229	0.711069	0.0347006	FALSE
120.066	positive	0.00503955	C4H9NO3	CHNO3_pos	1	L-threonine L-homoserine (2-aminoethoxy)acetic acid 2-hydroxyethyl 2-aminoacetate methyl 2-amino-3-hydroxypropanoate 3-amino-4-hydroxybutanoic acid threonine(L)	HMDB0000167 HMDB0000719 HMDB0060587 HMDB0061148 HMDB0245730 HMDB0250739 HMDB0250801	Carboxylic acids and derivatives Carboxylic acids and derivatives Carboxylic acids and derivatives Carboxylic acids and derivatives Carboxylic acids and derivatives Carboxylic acids and derivatives Carboxylic acids and derivatives	C00188 C00263	Glycine, serine and threonine metabolism Methionine Metabolism NA NA NA NA NA	Glycine, serine and threonine metabolism | Methionine Metabolism	1.17619	1.37398	1.58371	1.85856	4.54475e-09	3.08834e-09	2.21089e-16	1.11669e-15	TRUE
120.072	positive											1.58704	1.00949	2.26287	1.87809	6.44609e-09	4.07092e-09	2.51163e-12	8.71137e-13	TRUE
120.081	positive	0.120934	C8H9N	CHN_pos	5	indoline isoindoline	HMDB0253472 HMDB0253648	Indoles and derivatives Isoindoles and derivatives		NA NA		0.595626	0.827516	0.708133	0.278189	7.97573e-07	2.79981e-07	0.00228931	0.000138375	FALSE
120.089	positive	0.0722194	[13C]C8H10	[13C]CH_pos	5							0.14673	0.487438	0.0140888	0.349851	0.928402	0.0958705	0.000122281	8.49942e-06	FALSE
120.093	positive											0.499265	0.888419	-0.499794	-0.716941	0.155345	0.018289	0.0191804	0.00106483	FALSE
120.102	positive	0.0436628	C5H13NO2	CHNO2_pos	0	(dimethoxymethyl)dimethylamine	HMDB0255265	Orthocarboxylic acid derivatives		NA		1.1867	0.910958	1.82839	1.82791	0.000126947	2.64235e-05	4.4697e-11	1.03996e-11	TRUE
120.957	positive											1.99661	1.33598	1.25983	1.54234	9.31242e-13	8.3248e-12	3.82454e-15	6.62305e-15	FALSE
120.966	positive											0.841341	1.37552	1.08561	1.4446	0.00297361	0.000465655	1.30128e-10	2.64447e-11	FALSE
120.979	positive											0.469813	1.03761	0.71828	1.95512	0.149663	0.0176883	3.65539e-13	1.77244e-13	FALSE
120.981	positive											0.712448	1.62253	1.23736	1.09031	3.09247e-10	3.5009e-10	1.24506e-17	6.03708e-16	FALSE
120.983	positive											0.5183	1.09551	1.20687	2.14847	0.0202673	0.00274155	2.73818e-12	9.32372e-13	FALSE
120.984	positive											0.687012	1.07941	0.460323	2.24754	0.575044	0.0617168	1.32176e-08	1.6973e-09	FALSE
120.985	positive											0.390263	0.993955	0.981064	1.65084	0.103602	0.0125535	4.61815e-09	6.47186e-10	FALSE
120.987	positive											0.578483	1.1156	1.32649	1.3703	1.37783e-05	3.55065e-06	7.39674e-08	8.29453e-09	FALSE
121.008	positive											1.09819	0.991683	1.26924	1.94023	6.68362e-07	2.39488e-07	0.000367978	2.42032e-05	FALSE
121.013	positive											0.624353	1.10909	0.896692	1.6835	0.011881	0.00168264	2.44415e-05	1.86165e-06	FALSE
121.024	positive											1.01732	0.887765	3.70513	1.57572	0.00373909	0.000575788	0.000371547	2.44115e-05	TRUE
121.028	positive	0.0349938	C7H4O2	CHO2_pos	6							0.997028	1.04467	0.582173	0.58835	0.00482286	0.000731383	3.85515e-10	6.91307e-11	FALSE
121.032	positive											0.82641	0.438511	1.55483	1.00555	9.48002e-08	4.18322e-08	8.69789e-09	1.16312e-09	FALSE
121.04	positive	-0.243268	C6H4N2O	CHN2O_pos	6	benzofurazan [1,3]oxazolo[5,4-b]pyridine	HMDB0249016 HMDB0255974	Benzoxadiazoles Oxazolopyridines		NA NA		0.633734	0.969087	1.84994	1.70033	0.109137	0.013178	8.95773e-05	6.32235e-06	FALSE
121.05	positive	0.20826	C4H8O4	CHO4_pos	1	3,4-dihydroxybutanoic acid 2,4-dihydroxybutyric acid 4-deoxyerythronic acid 4-deoxythreonic acid 2-methylglyceric acid D-erythro-tetrose (2-hydroxyethoxy)acetic acid 2,3-dihydroxybutanoic acid 2,3,4-trihydroxybutanal 1,3-dihydroxypropan-2-yl formate	HMDB0000337 HMDB0000360 HMDB0000498 HMDB0002453 HMDB0002601 HMDB0002649 HMDB0242471 HMDB0245394 HMDB0250746 HMDB0254858	Hydroxy acids and derivatives Hydroxy acids and derivatives Organooxygen compounds Organooxygen compounds Hydroxy acids and derivatives Organooxygen compounds Carboxylic acids and derivatives Organooxygen compounds Organooxygen compounds Glycerolipids	C01796	NA NA NA NA NA NA NA NA NA NA		0.751911	0.720189	1.07936	0.909259	0.00125967	0.000212953	0.000158282	1.08678e-05	FALSE
121.059	positive											0.303907	0.819973	0.900522	1.10224	0.217715	0.0250406	0.000401022	2.62697e-05	FALSE
121.061	positive	0.263216	C3H8N2O3	CHN2O3_pos	1							0.988289	1.09953	1.86468	1.10486	4.99372e-05	1.13213e-05	0.000245329	1.6485e-05	FALSE
121.062	positive											1.73452	0.404824	-3.1612	-0.799249	0.00109843	0.000187776	0.0713029	0.00379263	FALSE
121.063	positive											1.68176	0.740408	2.55218	1.09389	5.98893e-06	1.70803e-06	0.000407286	2.66513e-05	FALSE
121.065	positive	-0.00999521	C8H8O	CHO_pos	5							0.387327	0.720584	0.0387718	0.28845	0.77252	0.0812131	0.000154845	1.06469e-05	FALSE
121.066	positive											0.960157	0.585763	1.77932	0.912698	0.00898277	0.00130279	0.00846726	0.000484612	FALSE
121.068	positive											1.22235	0.503069	-1.59242	-0.319787	0.0277152	0.00367238	0.244434	0.0124315	FALSE
121.072	positive											0.756139	0.785441	1.85081	1.94074	0.00536083	0.000806363	1.30338e-08	1.67725e-09	TRUE
121.076	positive	0.211545	C7H8N2	CHN2_pos	5	benzamidine	HMDB0248970	Benzene and substituted derivatives	C01784	NA		0.640873	0.66192	1.18149	-0.192211	0.0199101	0.00270099	0.302305	0.0152404	FALSE
121.086	positive	-0.00333115	C5H12O3	CHO3_pos	0	pentane-1,3,4-triol 2-(2-methoxyethoxy)ethanol 1,1,1-trimethoxyethane	HMDB0244182 HMDB0244920 HMDB0259236	Organooxygen compounds Organooxygen compounds Organooxygen compounds		NA NA NA		1.24272	0.926214	0.755187	1.17032	0.0389844	0.00503436	1.35086e-05	1.0592e-06	FALSE
121.089	positive											1.15991	1.65171	1.36243	-0.677352	4.0576e-08	2.00555e-08	9.08258e-06	7.30104e-07	FALSE
121.1	positive											0.6411	0.304629	0.596876	0.24093	0.0512835	0.00649962	0.0184907	0.00102748	FALSE
121.101	positive	0.0283112	C9H12	CH_pos	4							1.48685	1.48951	0.598199	0.590908	1.32927e-05	3.44778e-06	2.86697e-09	4.20746e-10	FALSE
121.103	positive											0.657157	0.204653	0.697034	0.251215	0.0487369	0.00620263	0.22733	0.0115981	FALSE
121.984	positive											0.693832	1.32852	1.35047	1.308	1.35539e-07	5.77923e-08	2.98728e-17	6.58401e-16	FALSE
122.003	positive											1.57755	1.19415	1.24084	1.09101	8.73058e-07	3.03195e-07	7.00754e-13	3.01762e-13	FALSE
122.032	positive	0.160298	[13C]C6H4O2	[13C]CHO2_pos	6							0.476507	0.361446	0.566708	0.25051	0.433066	0.0475016	0.127018	0.00662672	FALSE
122.045	positive											0.698906	1.47406	2.08968	2.23153	0.0355299	0.00462744	1.76561e-07	1.85306e-08	TRUE
122.049	positive											0.618622	0.4367	0.856255	0.38854	0.333157	0.037204	0.156493	0.00809998	FALSE
122.058	positive											0.555621	0.600454	1.55502	1.66694	0.0640655	0.00800801	0.00155241	9.54765e-05	TRUE
122.06	positive	-0.00165217	C7H7NO	CHNO_pos	5	2-ethenylpyridin-1-ium-1-olate	HMDB0245108	Pyridines and derivatives		NA		1.63666	1.46029	1.08925	0.719316	5.54084e-08	2.6405e-08	2.47942e-10	4.68522e-11	FALSE
122.068	positive	-0.0495618	[13C]C7H8O	[13C]CHO_pos	5							0.470161	0.534977	-0.080722	0.279224	0.546749	0.0589117	0.00115258	7.16677e-05	FALSE
122.073	positive											0.331138	1.43967	-0.335401	-1.21075	0.476985	0.0518908	3.75143e-05	2.77457e-06	FALSE
122.081	positive	0.00495565	C4H11NO3	CHNO3_pos	0							0.953627	1.18885	1.60707	2.0016	1.90722e-09	1.53076e-09	2.02231e-08	2.52208e-09	TRUE
122.096	positive	0.0363369	C8H11N	CHN_pos	4	(+/-)-α-methylbenzylamine 2-phenylethylamine 2,6-dimethylaniline O-ethylaniline 2,3-dimethylaniline 2,4,6-collidine m-ethylaniline 3,5-dimethylaniline P-ethylaniline benzenemethanamine, 4-methyl- N-methyl-O-toluidine	HMDB0002017 HMDB0012275 HMDB0060677 HMDB0245117 HMDB0245399 HMDB0245482 HMDB0245866 HMDB0246062 HMDB0246419 HMDB0246505 HMDB0255183	Organonitrogen compounds Benzene and substituted derivatives Benzene and substituted derivatives Benzene and substituted derivatives Benzene and substituted derivatives Pyridines and derivatives Benzene and substituted derivatives Benzene and substituted derivatives Benzene and substituted derivatives Benzene and substituted derivatives Benzene and substituted derivatives	C02455 C05332 C11004	NA NA NA NA NA NA NA NA NA NA NA		1.07057	0.523527	1.01727	0.26002	1.00994e-10	1.43071e-10	0.00308814	0.00018418	FALSE
122.105	positive	-0.011561	[13C]C8H12	[13C]CH_pos	4							0.735921	1.05003	0.395908	0.581483	0.00706837	0.00104472	6.27812e-08	7.14925e-09	FALSE
122.109	positive											0.374553	0.535609	0.160092	0.674179	0.787794	0.0826345	0.015646	0.000874017	FALSE
122.118	positive	0.125505	C5H15NO2	CHNO2_pos	-1							0.818497	1.14319	2.24258	1.88876	0.00035611	6.72883e-05	7.68229e-11	1.66147e-11	TRUE
122.961	positive											0.902476	0.995528	1.97057	1.91227	9.99454e-05	2.12815e-05	9.66285e-14	6.36597e-14	TRUE
122.977	positive											0.68594	1.23093	1.51638	1.41179	1.06274e-12	8.47721e-12	2.15222e-14	2.06241e-14	FALSE
122.985	positive											0.65707	1.24802	1.3952	1.40546	5.75763e-08	2.73376e-08	1.79679e-15	4.63421e-15	FALSE
123.008	positive	-0.00327868	C6H2O3	CHO3_pos	6							1.33208	0.96634	1.49402	1.5779	0.0326428	0.00427397	1.39466e-05	1.09107e-06	FALSE
123.014	positive											0.975997	1.417	1.21473	1.15992	2.12028e-10	2.58062e-10	2.85842e-17	6.92999e-16	FALSE
123.023	positive											1.03492	1.31151	0.784138	1.25528	3.25618e-06	9.73079e-07	6.0299e-12	1.81602e-12	FALSE
123.042	positive											0.587446	0.498823	0.746242	0.602324	0.000695642	0.000124031	0.309933	0.015612	FALSE
123.044	positive	-0.0475267	C7H6O2	CHO2_pos	5	benzoic acid P-hydroxybenzaldehyde benzodioxole tropolone	HMDB0001870 HMDB0011718 HMDB0244156 HMDB0259299	Benzene and substituted derivatives Organooxygen compounds Benzodioxoles Tropones	C00539 C00633 C15474	NA NA NA NA		0.950155	1.07501	0.796724	0.568175	2.23844e-06	6.9706e-07	1.2371e-10	2.52888e-11	FALSE
123.047	positive											0.834549	0.727733	1.99573	1.31853	2.42495e-07	9.71647e-08	5.53562e-05	4.01335e-06	FALSE
123.055	positive	0.0065548	C6H6N2O	CHN2O_pos	5	nicotinamide 3-aminopyridine-2-carbaldehyde isn pyridine-2-carboxamide 2-pyridinealdoxime 2-(nitrosomethyl)pyridine	HMDB0001406 HMDB0245820 HMDB0253663 HMDB0256533 HMDB0256964 HMDB0257592	Pyridines and derivatives Pyridines and derivatives Pyridines and derivatives Pyridines and derivatives Pyridines and derivatives Pyridines and derivatives	C00153 C02421 C01950	Nicotinate and nicotinamide metabolism NA NA NA NA NA	Nicotinate and nicotinamide metabolism	1.67412	1.54756	1.27368	1.04807	4.51897e-11	8.25013e-11	4.89266e-15	7.50749e-15	FALSE
123.057	positive											0.547219	0.496539	1.66039	1.15029	0.00706828	0.001045	1.0095e-06	9.35923e-08	FALSE
123.063	positive	-0.0409648	[13C]C6H7NO	[13C]CHNO_pos	5							0.879651	0.721496	1.34064	0.784968	0.000261012	5.06103e-05	1.18992e-05	9.41535e-07	FALSE
123.072	positive											1.70149	0.120425	-2.68119	-0.183228	0.000955919	0.000164991	0.496789	0.0246051	FALSE
123.079	positive											1.11721	0.234866	-0.594212	0.254003	0.242417	0.0277035	0.311427	0.0156807	FALSE
123.08	positive	-0.00983017	C8H10O	CHO_pos	4	ethylphenol gallex 3,5-dimethylphenol phenyl ethyl alcohol	HMDB0029306 HMDB0245456 HMDB0246064 HMDB0252021	Phenols Benzene and substituted derivatives Phenols Phenol ethers	C13637 C14582	NA NA NA NA		0.989953	0.648903	0.476128	0.184356	9.91083e-05	2.1138e-05	0.00687294	0.000397207	FALSE
123.082	positive											0.810159	0.148181	-0.392128	-0.216905	0.579031	0.0620933	0.544646	0.0268766	FALSE
123.092	positive	-0.0376789	C7H10N2	CHN2_pos	4	2-pyridylethylamine 2-dimethylaminopyridine 2,3-diaminotoluene 3,4-diaminotoluene 4-dimethylaminopyridine benzylhydrazine 2,3,3a,7a-tetrahydro-1H-indazole	HMDB0244915 HMDB0245104 HMDB0245386 HMDB0246023 HMDB0246412 HMDB0249078 HMDB0258900	Organonitrogen compounds Organonitrogen compounds Benzene and substituted derivatives Benzene and substituted derivatives Organonitrogen compounds Benzene and substituted derivatives Azolidines		NA NA NA NA NA NA NA		0.568672	0.850196	0.68312	0.387762	7.33741e-06	2.04646e-06	0.000678736	4.319e-05	FALSE
123.1	positive	0.160534	[13C]C7H11N	[13C]CHN_pos	4							0.773468	0.629376	1.15003	-0.0633611	0.000350782	6.63784e-05	0.62352	0.0306068	FALSE
123.115	positive											1.2822	0.923839	1.13934	0.911382	0.0050516	0.000763837	0.000382307	2.50844e-05	FALSE
123.117	positive	0.0278439	C9H14	CH_pos	3							1.00592	1.37606	0.468768	0.368901	1.69382e-05	4.27985e-06	5.02767e-06	4.20026e-07	FALSE
123.118	positive											0.838318	0.506094	1.09858	0.620063	0.0399284	0.00515114	0.0192707	0.0010696	FALSE
123.945	positive											0.794929	1.30071	1.19152	1.10449	1.11061e-07	4.82276e-08	3.52239e-15	6.42086e-15	FALSE
123.966	positive											0.832268	0.923149	1.36706	1.34152	0.000464407	8.55686e-05	7.52953e-12	2.18619e-12	FALSE
123.977	positive											0.511182	1.0678	1.61957	1.6429	0.0267816	0.00355867	1.40657e-10	2.81362e-11	TRUE
123.989	positive											1.00566	1.28373	0.891411	1.26654	0.0787503	0.009694	7.01592e-10	1.17469e-10	FALSE
124.011	positive											0.30158	0.700533	0.919656	0.842066	0.0159769	0.00219848	0.00866764	0.000495495	FALSE
124.015	positive											0.885765	0.960225	1.54147	1.55107	5.39309e-06	1.5466e-06	1.85497e-11	4.75897e-12	TRUE
124.018	positive											1.00913	0.936317	1.43449	3.0139	4.94197e-13	9.4902e-12	1.45559e-06	1.31923e-07	FALSE
124.039	positive	0.0422654	C6H5NO2	CHNO2_pos	5	niacin picolinic acid isonicotinic acid	HMDB0001488 HMDB0002243 HMDB0060665	Pyridines and derivatives Pyridines and derivatives Pyridines and derivatives	C00253 C10164 C07446	Nicotinate and nicotinamide metabolism NA NA	Nicotinate and nicotinamide metabolism	2.07896	1.39309	1.23645	1.10501	8.75035e-12	2.98484e-11	2.39018e-14	2.24605e-14	FALSE
124.046	positive											0.484049	0.515022	1.72902	1.29815	0.00854474	0.00124588	2.09992e-07	2.17011e-08	FALSE
124.047	positive	-0.00487646	[13C]C6H6O2	[13C]CHO2_pos	5							0.61583	0.233911	0.722873	0.363825	0.000168628	3.41396e-05	0.0034239	0.000203455	FALSE
124.052	positive											0.331142	0.984916	0.0566434	-1.12683	0.887741	0.0920199	2.82973e-05	2.13057e-06	FALSE
124.076	positive	-0.00162511	C7H9NO	CHNO_pos	4	1β-methylcarbapenem p-methylaminophenol O-anisidine	HMDB0244863 HMDB0246311 HMDB0255842	Lactams Organonitrogen compounds Phenol ethers	C19191	NA NA NA		1.4144	0.669722	0.970635	0.418049	2.53527e-09	1.91619e-09	2.64976e-05	2.00691e-06	FALSE
124.084	positive	0.0325001	[13C]C7H10O	[13C]CHO_pos	4							0.525182	0.379086	0.30933	0.180308	0.00979813	0.00140961	0.0127564	0.000718893	FALSE
124.087	positive	-0.110498	C6H9N3	CHN3_pos	4	propanenitrile, 3,3'-iminobis-	HMDB0246005	Organonitrogen compounds		NA		0.360944	0.591095	1.11737	0.771727	0.0515267	0.00652725	0.00361444	0.000214095	FALSE
124.088	positive											0.376262	1.25434	0.157447	0.0511447	0.761928	0.0801972	0.871186	0.0420489	FALSE
124.095	positive	0.0861174	[13C]C6H10N2	[13C]CHN2_pos	4							0.334423	0.559907	0.988995	0.630573	0.0989907	0.0120229	0.00301345	0.000179947	FALSE
124.097	positive	0.0048745	C4H13NO3	CHNO3_pos	-1							1.26431	1.17973	0.838887	1.65933	3.01463e-05	7.18314e-06	2.66033e-10	4.97282e-11	FALSE
124.112	positive	0.0357419	C8H13N	CHN_pos	3	2,4,6-trimethyl-1,4-dihydropyridine	HMDB0246411	Pyridines and derivatives		NA		1.21793	1.3715	1.23593	1.60974	2.95265e-09	2.1746e-09	1.63197e-07	1.72325e-08	FALSE
124.12	positive	-0.0113717	[13C]C8H14	[13C]CH_pos	3							0.82376	1.15034	0.432542	0.401687	2.94602e-05	7.04232e-06	1.98291e-06	1.75902e-07	FALSE
124.489	positive											1.13214	1.40951	1.19962	1.25752	7.57402e-07	2.67875e-07	1.22802e-11	3.30803e-12	FALSE
124.952	positive											0.929018	0.401252	2.2347	1.1273	7.14431e-06	1.99905e-06	0.000283818	1.89037e-05	FALSE
124.953	positive											0.609317	1.01649	1.60578	1.50681	0.000257694	5.0098e-05	1.23576e-06	1.13356e-07	TRUE
124.974	positive											0.685763	1.58072	1.19741	1.1385	7.55968e-07	2.67733e-07	4.50224e-17	6.42076e-16	FALSE
124.977	positive											0.897002	0.841056	1.78135	2.06266	2.25398e-07	9.09464e-08	2.73085e-08	3.32532e-09	TRUE
124.989	positive											1.22053	0.479438	1.17618	0.919701	1.30282e-09	1.12583e-09	0.101988	0.00536127	FALSE
125.003	positive											0.862386	0.858589	1.15181	1.14185	3.31577e-10	3.66565e-10	2.77584e-13	1.44727e-13	FALSE
125.011	positive											0.912924	1.01099	1.19886	1.67409	4.02638e-08	1.99392e-08	7.15028e-12	2.0911e-12	FALSE
125.021	positive											0.617737	1.56796	1.00869	3.07008	1.56995e-05	4.00395e-06	1.37721e-08	1.76197e-09	FALSE
125.023	positive	-0.00322539	C6H4O3	CHO3_pos	5	cyclohex-5-ene-1,2,4-trione	HMDB0253785	Organooxygen compounds		NA		1.49441	0.909771	1.03929	1.05753	4.67298e-10	4.81687e-10	1.33231e-12	5.10282e-13	FALSE
125.035	positive	-0.0306384	C5H4N2O2	CHN2O2_pos	5	pyrazinoic acid 2-nitropyridine 4-nitropyridine pyrimidine-4-carboxylic acid	HMDB0059734 HMDB0245266 HMDB0246547 HMDB0256978	Diazines Allyl-type 1,3-dipolar organic compounds Allyl-type 1,3-dipolar organic compounds Diazines	C19915	NA NA NA NA		1.09816	1.04813	1.22057	1.13887	7.65165e-06	2.11589e-06	8.30195e-09	1.11201e-09	FALSE
125.039	positive											0.567771	0.576316	0.817245	1.36528	1.70555e-06	5.4587e-07	0.0424088	0.00229809	FALSE
125.043	positive	0.245091	[13C]C5H5NO2	[13C]CHNO2_pos	5							1.48501	0.981335	3.14544	1.6658	0.000153528	3.14138e-05	0.000131028	9.08134e-06	TRUE
125.054	positive	1.91057	[13C]C4H5N3O	[13C]CHN3O_pos	5							0.779998	0.509913	1.79997	1.05613	5.13983e-05	1.16424e-05	5.30117e-13	2.39781e-13	FALSE
125.057	positive											0.675566	0.0374441	0.526987	0.0766481	0.0549089	0.00692692	0.851982	0.0411794	FALSE
125.06	positive	0.0338567	C7H8O2	CHO2_pos	4	4-methyl-1,2-benzenediol guaiacol p-hydroxymethoxybenzene phenylmethanediol	HMDB0000873 HMDB0001398 HMDB0244539 HMDB0256441	Phenols Phenols Phenol ethers Benzene and substituted derivatives	C06730 C15572	NA Tyrosine metabolism NA NA	Tyrosine metabolism	0.917834	0.507432	0.726364	0.25721	7.35633e-06	2.04843e-06	0.00052005	3.35949e-05	FALSE
125.071	positive	0.0064483	C6H8N2O	CHN2O_pos	4	4-methyl-1H-pyrrole-3-carboxamide	HMDB0246501	Pyrroles		NA		1.10738	1.50265	1.48475	1.76538	1.58306e-06	5.12678e-07	7.62693e-15	1.03301e-14	FALSE
125.079	positive	-0.120898	[13C]C6H9NO	[13C]CHNO_pos	4							0.603424	0.504342	1.15908	-0.136106	0.0776001	0.00956604	0.566673	0.0279124	FALSE
125.094	positive											0.664379	0.61468	0.659616	0.525373	0.110161	0.0132892	0.00260142	0.000156267	FALSE
125.096	positive	-0.00967049	C8H12O	CHO_pos	3							0.880704	1.10011	0.325712	0.44115	0.00136523	0.000228857	9.26341e-08	1.01346e-08	FALSE
125.098	positive											1.11498	0.817579	0.852449	0.161325	0.0356935	0.00464758	0.483379	0.0239557	FALSE
125.1	positive	-0.43677	[13C]C3H13NO3	[13C]CHNO3_pos	-1							0.897312	1.39331	0.194338	2.84155	0.790258	0.0828762	9.52056e-07	8.86057e-08	FALSE
125.124	positive											0.424738	0.467056	-0.66531	-0.181299	0.410611	0.0452012	0.51018	0.0252272	FALSE
125.132	positive	0.0273917	C9H16	CH_pos	2	1,1-dimethyl-2-(2-methylprop-1-en-1-yl)cyclopropane hydrindane	HMDB0244025 HMDB0253139	Unsaturated hydrocarbons Polycyclic hydrocarbons		NA NA		0.68359	0.838325	0.22204	0.434576	0.0627085	0.00784217	7.40848e-08	8.30385e-09	FALSE
125.556	positive											0.561722	0.473045	1.59978	1.32513	2.21897e-05	5.45524e-06	7.38793e-10	1.22849e-10	FALSE
125.953	positive											0.50867	0.890407	0.974576	2.204	0.00332856	0.000516713	6.32672e-09	8.66098e-10	FALSE
125.961	positive											1.30924	1.31392	1.11646	0.949294	1.38882e-09	1.18047e-09	1.72145e-16	9.70584e-16	FALSE
126.016	positive											0.738143	1.01239	1.04805	0.874927	0.00241803	0.000385168	0.000993565	6.20828e-05	FALSE
126.019	positive	0.0847923	C5H3NO3	CHNO3_pos	5							0.795274	0.929098	1.0487	1.38528	0.0201916	0.00273273	1.08257e-08	1.41641e-09	FALSE
126.031	positive											0.769531	0.863733	1.96152	1.90603	0.0156356	0.00215666	1.48674e-05	1.159e-06	TRUE
126.037	positive											1.06669	0.476438	2.58446	1.68936	0.000514563	9.41408e-05	1.35351e-09	2.12806e-10	TRUE
126.055	positive	-0.0383854	C6H7NO2	CHNO2_pos	4	3-aminobenzene-1,2-diol pyrraline N-(prop-2-enoyl)prop-2-enamide ethyl cyanoacrylate N-ethylmaleimide 2H-pyran-2-carboxamide	HMDB0245816 HMDB0246729 HMDB0251122 HMDB0252026 HMDB0255137 HMDB0256941	Phenols Organooxygen compounds Carboxylic acids and derivatives Carboxylic acids and derivatives Pyrrolidines Pyrans	C02441	NA NA NA NA NA NA		1.67037	1.3574	1.17362	0.883795	3.49283e-11	7.04667e-11	2.78553e-13	1.4492e-13	FALSE
126.063	positive	-0.00479786	[13C]C6H8O2	[13C]CHO2_pos	4							0.632904	0.521153	0.600498	0.167617	0.00011399	2.39475e-05	0.125321	0.00654104	FALSE
126.091	positive	-0.00159892	C7H11NO	CHNO_pos	3							1.33659	1.08354	0.889955	0.619178	5.371e-09	3.52507e-09	1.62175e-07	1.7132e-08	FALSE
126.099	positive	0.0319764	[13C]C7H12O	[13C]CHO_pos	3							0.822586	1.06279	0.235601	0.466983	0.0149901	0.00207702	1.02899e-07	1.1172e-08	FALSE
126.104	positive											0.610852	0.661493	0.200715	0.739858	0.730139	0.0770232	0.00258155	0.000155188	FALSE
126.128	positive	0.0351661	C8H15N	CHN_pos	2	octahydroindolizine tropane	HMDB0255902 HMDB0259295	Indolizidines Tropane alkaloids		NA NA		1.76127	0.97606	-0.365341	1.26212	0.276682	0.0313566	1.53211e-06	1.38496e-07	FALSE
126.136	positive	-0.0111885	[13C]C8H16	[13C]CH_pos	2							1.0091	0.154031	-0.549047	-0.183526	0.0346743	0.00452282	0.247473	0.0125781	FALSE
126.937	positive											0.370486	0.479909	0.794823	0.907797	0.0242374	0.00323804	3.37832e-09	4.88691e-10	FALSE
126.961	positive											0.932103	0.892863	1.77926	1.28578	0.012654	0.00178044	1.7729e-05	1.36887e-06	FALSE
126.964	positive											0.765465	0.698325	1.17085	1.87129	0.182653	0.0212435	0.016981	0.000946195	FALSE
126.998	positive											0.824599	0.826643	1.04609	0.939537	1.50138e-07	6.31856e-08	9.27975e-15	1.19037e-14	FALSE
127	positive											0.634792	1.71295	1.79759	2.11995	0.00150408	0.000249632	2.59945e-09	3.84746e-10	TRUE
127.007	positive											0.62774	0.282027	1.17977	0.830383	5.99891e-06	1.70899e-06	0.00467947	0.00027483	FALSE
127.021	positive											1.37819	1.43155	-1.73061	-1.81553	0.000112322	2.36163e-05	3.81629e-05	2.81996e-06	TRUE
127.024	positive											1.28081	0.737998	1.49332	1.26419	8.9302e-08	3.97102e-08	0.000285245	1.89935e-05	FALSE
127.037	positive											0.600726	1.45957	0.896001	1.83614	0.0852241	0.0104463	1.26547e-05	9.98707e-07	FALSE
127.039	positive	-0.0031738	C6H6O3	CHO3_pos	4	pyrogallol 2,5-furandione, 3,4-dimethyl- 3-(hydroxymethyl)furan-2-carbaldehyde	HMDB0013674 HMDB0245404 HMDB0246148	Phenols Dihydrofurans Organooxygen compounds	C01108	NA NA NA		1.66171	1.31972	1.11959	1.03644	3.11318e-11	6.6426e-11	2.29295e-15	5.00816e-15	FALSE
127.05	positive	0.366542	C5H6N2O2	CHN2O2_pos	4	thymine IMAC 5-methyl-1H-pyrazole-3-carboxylic acid 6-methylpyrimidine-2,4-diol	HMDB0000262 HMDB0002024 HMDB0246825 HMDB0247093	Diazines Azoles Azoles Diazines	C00178 C02835	Pyrimidine metabolism Histidine metabolism NA NA	Histidine metabolism | Pyrimidine metabolism	1.39022	1.61208	1.36504	1.14011	2.11377e-09	1.65804e-09	1.0481e-08	1.37651e-09	FALSE
127.058	positive	-0.314158	[13C]C5H7NO2	[13C]CHNO2_pos	4							1.06417	0.989849	1.15893	0.878254	0.00461367	0.000701712	8.23432e-09	1.10356e-09	FALSE
127.073	positive											0.920529	0.890454	1.01772	1.17818	4.63903e-07	1.72298e-07	2.93e-15	5.63774e-15	FALSE
127.075	positive	0.0333153	C7H10O2	CHO2_pos	3	1-cyclohexenecarboxylic acid	HMDB0243852	Carboxylic acids and derivatives	C12101	NA		1.23224	0.957485	0.759806	0.638854	1.92378e-07	7.89127e-08	1.437e-10	2.8674e-11	FALSE
127.077	positive											0.700296	0.23337	0.514154	0.329905	0.243101	0.0277754	0.247883	0.0125937	FALSE
127.087	positive	0.0856604	C6H10N2O	CHN2O_pos	3							0.794039	1.16386	1.51079	1.58049	5.0028e-06	1.44587e-06	1.53646e-09	2.38324e-10	TRUE
127.109	positive											0.838138	0.0660732	-0.317642	-0.107654	0.338118	0.037685	0.799586	0.0388171	FALSE
127.112	positive	-0.00951592	C8H14O	CHO_pos	2	(2Z)-oct-2-enal	HMDB0030961	Organooxygen compounds		NA		0.644453	1.24897	0.65309	0.662333	2.18771e-06	6.82903e-07	2.37445e-08	2.91771e-09	FALSE
127.114	positive											0.980076	0.23478	-0.481435	-0.240546	0.308797	0.0347155	0.571671	0.0281529	FALSE
127.148	positive	-0.0523225	C9H18	CH_pos	1	cyclohexane, 1,1,2-trimethyl- 1,2,4-trimethylcyclohexane	HMDB0244044 HMDB0244143	Saturated hydrocarbons Saturated hydrocarbons		NA NA		0.619895	0.721552	0.665722	0.451473	0.0792793	0.00974986	0.000276925	1.84902e-05	FALSE
127.95	positive											0.647689	0.874187	1.74731	2.17247	1.69341e-05	4.28091e-06	3.99239e-08	4.71008e-09	TRUE
127.965	positive											0.646192	1.37329	1.13737	1.65902	0.0892058	0.0109008	5.82257e-07	5.62179e-08	FALSE
128.032	positive											0.536529	1.43038	0.962553	2.28455	0.0447057	0.00572755	3.86979e-08	4.58552e-09	FALSE
128.034	positive	0.00472341	C5H5NO3	CHNO3_pos	4							1.23874	0.990198	1.34957	1.3653	5.69125e-10	5.65297e-10	1.9871e-12	7.13713e-13	FALSE
128.042	positive	0.0377848	[13C]C5H6O3	[13C]CHO3_pos	4							1.0711	1.0451	1.3733	1.46507	1.69092e-10	2.13314e-10	7.14927e-10	1.19537e-10	FALSE
128.045	positive	-0.25819	C4H5N3O2	CHN3O2_pos	4	1-methyl-4-nitroimidazole 2-methyl-5-nitroimidazole	HMDB0060659 HMDB0245223	Azoles Azoles	C16621	NA NA		0.521677	1.16703	0.640607	1.19939	0.119962	0.014408	1.02315e-05	8.17852e-07	FALSE
128.062	positive											0.843248	0.92325	0.652295	0.575509	0.00583174	0.000873646	6.48469e-10	1.09634e-10	FALSE
128.071	positive	-0.0377764	C6H9NO2	CHNO2_pos	3	isoguvacine 2-(cyclopropylamino)prop-2-enoic acid	HMDB0252607 HMDB0253644 HMDB0254639	Carboxylic acids and derivatives Pyridines and derivatives Carboxylic acids and derivatives	C13694	NA NA NA		1.57827	1.44954	1.13203	0.881864	6.83253e-11	1.10361e-10	3.18307e-14	2.76598e-14	FALSE
128.079	positive	-0.00472175	[13C]C6H10O2	[13C]CHO2_pos	3							1.02937	0.797843	0.753114	0.64564	3.4711e-07	1.34108e-07	1.09969e-08	1.43647e-09	FALSE
128.107	positive	-0.00157357	C7H13NO	CHNO_pos	2	cyclohexanecarboxamide cyclohexylformamide	HMDB0250651 HMDB0255105	Carboxylic acids and derivatives Carboxylic acids and derivatives	C11519	NA NA		0.996646	0.996247	0.566362	0.53292	0.000362042	6.82599e-05	1.03132e-06	9.5433e-08	FALSE
128.115	positive	0.0314693	[13C]C7H14O	[13C]CHO_pos	2							0.617452	1.23737	0.60713	0.658926	7.79439e-06	2.14963e-06	4.27918e-08	5.02154e-09	FALSE
128.118	positive	-1.91644	C6H13N3	CHN3_pos	2							0.292517	0.495395	0.333336	0.15882	0.345588	0.0384431	0.461933	0.0229491	FALSE
128.143	positive	0.113264	C8H17N	CHN_pos	1							0.933739	1.15292	1.7863	1.38665	4.8384e-08	2.34893e-08	4.15008e-13	1.96131e-13	FALSE
128.934	positive											0.695262	0.594731	1.55681	0.982418	0.0158663	0.00218442	1.46924e-05	1.14572e-06	FALSE
128.949	positive											1.77048	1.7073	1.52427	1.10361	2.64294e-08	1.40116e-08	5.26557e-11	1.20093e-11	FALSE
128.953	positive											0.934732	0.820412	1.67992	1.89703	5.25159e-07	1.92976e-07	6.58198e-11	1.44936e-11	TRUE
128.971	positive											0.590692	1.05169	1.25332	1.55377	0.00138804	0.000232306	1.56242e-09	2.4158e-10	FALSE
128.978	positive											0.854716	0.247752	2.97378	-0.0178268	0.00283901	0.000446059	0.972941	0.0466999	FALSE
128.984	positive											1.24523	0.615063	1.74411	1.32545	3.27077e-05	7.72249e-06	8.55914e-08	9.44082e-09	FALSE
129.01	positive											0.978302	0.658399	2.28079	1.03977	0.00367257	0.000566891	0.000132824	9.19268e-06	FALSE
129.018	positive	-0.0390592	C5H4O4	CHO4_pos	4	2,4-dioxopentanedial	HMDB0254631	Organooxygen compounds		NA		1.18629	0.652962	1.26365	0.925461	3.36557e-08	1.70745e-08	0.000190884	1.29777e-05	FALSE
129.029	positive	-0.143725	C4H4N2O3	CHN2O3_pos	4	6-hydroxyuracil	HMDB0245479	Diazines		NA		0.830318	1.12818	0.678609	1.23278	0.0581875	0.00729967	2.65346e-05	2.00908e-06	FALSE
129.052	positive											0.83665	0.867952	0.301034	1.41136	0.148313	0.0175567	0.00605852	0.000352239	FALSE
129.055	positive	-0.00312384	C6H8O3	CHO3_pos	3	furaneol hexane-2,3,5-trione	HMDB0040594 HMDB0245435	Dihydrofurans Organooxygen compounds		NA NA		1.28169	1.13759	0.925673	0.775454	7.33061e-10	6.89808e-10	8.53885e-14	5.81509e-14	FALSE
129.066	positive	-0.107763	C5H8N2O2	CHN2O2_pos	3	(5S)-5-methyl-1,3-diazinane-2,4-dione	HMDB0000079	Diazines	C00906	Pyrimidine metabolism	Pyrimidine metabolism	1.20268	1.12155	1.40639	1.21043	1.96685e-12	1.14583e-11	2.21929e-13	1.21182e-13	FALSE
129.07	positive	0.0265495	C10H8	CH_pos	7	azulene	HMDB0248822	Unsaturated hydrocarbons	C13392	NA		0.858142	1.15629	0.569513	0.514629	8.37702e-05	1.81504e-05	7.3242e-10	1.21957e-10	FALSE
129.074	positive	-0.309214	[13C]C5H9NO2	[13C]CHNO2_pos	3							0.900513	0.971021	1.16679	1.08308	0.00092144	0.000159571	3.23493e-09	4.69911e-10	FALSE
129.089	positive											0.544982	0.827471	0.559396	0.602969	0.2558	0.0291238	0.000787268	4.97826e-05	FALSE
129.091	positive	-0.0452829	C7H12O2	CHO2_pos	2	butyl acrylate isobutyl acrylate	HMDB0249474 HMDB0253609	Carboxylic acids and derivatives Carboxylic acids and derivatives	C10921	NA NA		1.08403	1.67342	0.610867	0.705581	2.28491e-06	7.08553e-07	8.47283e-13	3.5295e-13	FALSE
129.093	positive											0.819274	0.635342	0.838076	0.638715	0.194937	0.022576	0.00126039	7.80316e-05	FALSE
129.102	positive	0.00624537	C6H12N2O	CHN2O_pos	2	1-piperidinecarboxamide	HMDB0256575 HMDB0256678	Piperidines Carboxylic acids and derivatives		NA NA		1.28361	1.00699	1.25943	2.41497	3.73743e-13	9.22769e-12	2.38328e-06	2.08895e-07	FALSE
129.11	positive	0.195155	[13C]C6H13NO	[13C]CHNO_pos	2							0.911348	1.35513	-0.137003	0.381216	0.80155	0.0839415	0.197206	0.0101038	FALSE
129.116	positive											0.380544	0.725265	0.565043	0.368712	0.219854	0.0252697	0.0779229	0.00413477	FALSE
129.118	positive											0.770945	0.615445	0.0871556	0.458637	0.813154	0.0849851	0.00532028	0.000310959	FALSE
129.127	positive	-0.00936621	C8H16O	CHO_pos	1							0.753018	1.12882	0.724789	0.526495	3.22937e-09	2.33854e-09	7.11061e-08	8.01444e-09	FALSE
129.129	positive											0.74642	0.289856	-0.104671	0.238522	0.902189	0.0934429	0.383409	0.0191738	FALSE
129.949	positive											0.737551	0.914864	2.03521	1.96437	0.000362296	6.8283e-05	1.77291e-08	2.23519e-09	TRUE
130.013	positive	-0.263553	C4H3NO4	CHNO4_pos	4	3,4-dioxoazetidine-2-carboxylic acid	HMDB0258122	Carboxylic acids and derivatives		NA		0.592094	1.21098	1.07337	0.980663	0.0717242	0.00890309	0.00753357	0.000433014	FALSE
130.05	positive	0.00464963	C5H7NO3	CHNO3_pos	3	pyroglutamic acid dimethadione 3-hydroxy-1-methylpyrrolidine-2,5-dione 4-oxoproline 1-methylpyrrole-2,3,5-triol (+)-pyroglutamate 6-oxa-1-azabicyclo[3.1.0]hexane-2-carboxylic acid	HMDB0000267 HMDB0061093 HMDB0245148 HMDB0246561 HMDB0255336 HMDB0257001 HMDB0260147	Carboxylic acids and derivatives Azolidines Carboxylic acids and derivatives Carboxylic acids and derivatives Pyrroles Pyrrolidines Carboxylic acids and derivatives	C01879	Glutathione metabolism NA NA NA NA NA NA	Glutathione metabolism	1.53332	1.53114	1.23247	0.981741	1.42963e-12	9.62661e-12	7.44971e-16	2.47414e-15	FALSE
130.058	positive	0.0371947	[13C]C5H8O3	[13C]CHO3_pos	3							0.86778	0.883446	0.814887	0.790082	3.56836e-06	1.05905e-06	1.05222e-07	1.14037e-08	FALSE
130.065	positive	0.111578	C9H7N	CHN_pos	7							0.72256	0.742753	0.394873	0.209997	0.215466	0.0247983	0.00516195	0.000302142	FALSE
130.068	positive											0.892947	0.447569	1.54397	1.02727	7.23867e-09	4.47873e-09	1.31654e-08	1.69239e-09	FALSE
130.073	positive	-0.165807	[13C]C9H8	[13C]CH_pos	7							0.876628	0.308833	1.09114	0.327136	0.016454	0.00225932	0.00884543	0.000504825	FALSE
130.078	positive											0.817412	0.594164	0.450265	-0.3958	0.149576	0.0176821	0.0141453	0.00079311	FALSE
130.086	positive	0.0402854	C6H11NO2	CHNO2_pos	2	(+,-)-pipecolic acid L-pipecolic acid (+)-pipecolic acid vigabatrin (2S)-1-methylpyrrolidine-2-carboxylic acid 2-aminocyclopentane-1-carboxylic acid 2-methylpyrrolidine-1-carboxylic acid 2-aminoethyl 2-methylprop-2-enoate pyrrolidin-3-ylacetic acid isonipecotic acid nipecotic acid	HMDB0000070 HMDB0000716 HMDB0005960 HMDB0015212 HMDB0094696 HMDB0242326 HMDB0242709 HMDB0245015 HMDB0247562 HMDB0253664 HMDB0255618	Carboxylic acids and derivatives Carboxylic acids and derivatives Carboxylic acids and derivatives Carboxylic acids and derivatives Carboxylic acids and derivatives Carboxylic acids and derivatives Pyrrolidines Carboxylic acids and derivatives Pyrrolidines Piperidines Piperidines	C00408 C00408 C07500	NA Lysine degradation NA NA NA NA NA NA NA NA NA	Lysine degradation	1.26104	1.07538	0.967995	0.950895	1.93071e-11	4.836e-11	6.45206e-11	1.42854e-11	FALSE
130.094	positive	-0.00464803	[13C]C6H12O2	[13C]CHO2_pos	2							1.20035	1.27892	0.545095	0.720999	1.07586e-05	2.86355e-06	1.1299e-10	2.33533e-11	FALSE
130.123	positive	-0.001549	C7H15NO	CHNO_pos	1	2-amino-2,4-dimethylpentanal	HMDB0246589	Organonitrogen compounds		NA		1.10291	1.03957	0.72289	0.578932	7.59608e-07	2.68472e-07	1.86651e-07	1.948e-08	FALSE
130.131	positive	0.0309781	[13C]C7H16O	[13C]CHO_pos	1							0.701715	0.734954	0.717309	0.460565	9.76718e-07	3.33169e-07	2.9855e-05	2.2402e-06	FALSE
130.159	positive	0.0340685	C8H19N	CHN_pos	0	N,N-diisopropylethylamine dibutylamine octylamine	HMDB0247306 HMDB0251174 HMDB0255916	Organonitrogen compounds Organonitrogen compounds Organonitrogen compounds	C01740	NA NA NA		0.898466	1.32165	1.51687	1.21761	6.017e-11	1.00963e-10	1.84031e-15	4.64757e-15	FALSE
130.933	positive											1.81269	1.32198	1.66023	1.1657	2.1728e-05	5.36208e-06	6.99578e-08	7.90339e-09	FALSE
130.965	positive											0.721236	1.36835	1.11014	1.85912	8.29263e-05	1.79901e-05	3.74224e-12	1.20169e-12	FALSE
130.979	positive											2.17344	0.993539	1.26457	1.03704	1.39577e-10	1.84615e-10	7.25359e-14	5.21831e-14	FALSE
131.002	positive											1.20766	0.862242	1.71989	1.55576	6.73313e-08	3.1338e-08	3.93459e-10	7.02954e-11	TRUE
131.034	positive	-0.0384537	C5H6O4	CHO4_pos	3	citraconic acid itaconic acid 4-methoxy-4-oxobut-2-enoic acid 2-methyl-2-butenedioic acid 2-pentenedioic acid	HMDB0000634 HMDB0002092 HMDB0243642 HMDB0245226 HMDB0256281	Fatty Acyls Fatty Acyls Fatty Acyls Fatty Acyls Carboxylic acids and derivatives	C02226 C00490	NA NA NA NA NA		0.853319	0.398125	1.09355	0.571235	1.2507e-09	1.08804e-09	4.06717e-06	3.44291e-07	FALSE
131.045	positive	0.0892048	C4H6N2O3	CHN2O3_pos	3	5-hydroxy-1-methylimidazolidine-2,4-dione 4,5-dihydroxy-1-methyl-3H-imidazol-2-one	HMDB0246800 HMDB0257737	Azolidines Azoles		NA NA		1.11143	1.13272	1.64196	1.72201	3.92011e-09	2.73558e-09	2.17504e-08	2.69316e-09	TRUE
131.049	positive	0.0676705	C9H6O	CHO_pos	7							0.563408	1.16221	0.464352	0.735319	0.1632	0.0191659	1.86052e-11	4.76816e-12	FALSE
131.052	positive											0.882135	0.498368	1.3953	1.04447	3.77917e-08	1.88228e-08	4.87146e-10	8.49673e-11	FALSE
131.054	positive											0.631516	0.40046	0.695327	0.548188	0.0120504	0.00170292	0.0215033	0.00118754	FALSE
131.06	positive	-0.0353702	C8H6N2	CHN2_pos	7	1,5-naphthyridine 1,8-naphthyridine cinnoline phthalazine quinazoline quinoxaline	HMDB0244238 HMDB0244251 HMDB0250265 HMDB0256500 HMDB0257035 HMDB0257053	Diazanaphthalenes Diazanaphthalenes Diazanaphthalenes Diazanaphthalenes Diazanaphthalenes Diazanaphthalenes	C18575	NA NA NA NA NA NA		1.40399	0.402259	2.03273	-0.308346	1.21616e-06	4.0577e-07	0.0256025	0.00140655	FALSE
131.069	positive	0.304472	[13C]C8H7N	[13C]CHN_pos	7							0.894878	1.08506	1.06987	-0.173123	0.00321405	0.000500586	0.100159	0.00526737	FALSE
131.07	positive	-0.00307543	C6H10O3	CHO3_pos	2	(S)-omv ketoisocaproate 4-hydroxy-4-methyloxan-2-one HEMA 2-hydroxy-2-methylpentanedial diglycidyl ether 5-hydroxy-2-methylpent-2-enoic acid formyl pentanoate 2-formylpentanoic acid 2-(hydroxymethyl)pentanedial propionic anhydride 4-methoxy-2-methylidenebutanoic acid 3-hydroxy-3-methylpentanedial	HMDB0000491 HMDB0000695 HMDB0244840 HMDB0245159 HMDB0245213 HMDB0251282 HMDB0253265 HMDB0253790 HMDB0253791 HMDB0255360 HMDB0256826 HMDB0257691 HMDB0257911	Keto acids and derivatives Keto acids and derivatives Lactones Carboxylic acids and derivatives Organooxygen compounds Epoxides Fatty Acyls Carboxylic acids and derivatives Fatty Acyls Organooxygen compounds Carboxylic acids and derivatives Fatty Acyls Organooxygen compounds	C00671 C00233 C14530	Valine, leucine and isoleucine degradation Valine, leucine and isoleucine degradation NA NA NA NA NA NA NA NA NA NA NA	Valine, leucine and isoleucine degradation	1.10112	1.70278	0.890371	1.01356	3.92978e-09	2.73864e-09	1.75488e-14	1.81045e-14	FALSE
131.081	positive	-0.0292141	C5H10N2O2	CHN2O2_pos	2	3-amino-1-hydroxy-4-methylpyrrolidin-2-one 4-aminopyrrolidine-2-carboxylic acid morpholine-4-carboxamide 4-amino-5-oxopentanamide	HMDB0243603 HMDB0244734 HMDB0254895 HMDB0258161	Carboxylic acids and derivatives Carboxylic acids and derivatives Oxazinanes Carboxylic acids and derivatives		NA NA NA NA		0.914134	1.06353	1.3893	1.85426	1.16411e-08	6.78938e-09	5.87052e-15	8.57384e-15	FALSE
131.086	positive	0.0261381	C10H10	CH_pos	6	dialin divinylbenzene divinylbenzene	HMDB0244076 HMDB0251501 HMDB0256036	Naphthalenes Benzene and substituted derivatives Benzene and substituted derivatives		NA NA NA		1.58493	1.51807	0.945423	0.476704	3.28182e-08	1.67315e-08	9.76724e-10	1.58394e-10	FALSE
131.089	positive											0.390882	0.575114	0.82532	1.08534	5.03677e-06	1.45326e-06	2.16265e-05	1.65504e-06	FALSE
131.107	positive	0.032283	C7H14O2	CHO2_pos	1							0.728548	0.504932	0.38384	0.307642	0.00452673	0.000689297	0.000420425	2.7474e-05	FALSE
131.118	positive	-0.0707091	C6H14N2O	CHN2O_pos	1	acetylputrescine 2-amino-4-methylpentanamide 2,6-diaminohexanal 2-amino-3-methylpentanamide 1-piperazineethanol methyl-n-amylnitrosamine N-nitrosodipropylamine (nitrosomethyl)(pentyl)amine	HMDB0002064 HMDB0247199 HMDB0249527 HMDB0253897 HMDB0254989 HMDB0255083 HMDB0255205 HMDB0255207	Carboximidic acids and derivatives Carboxylic acids and derivatives Organonitrogen compounds Carboxylic acids and derivatives Diazinanes Organonitrogen compounds Organonitrogen compounds Organonitrogen compounds	C02714 C19279	NA NA NA NA NA NA NA NA		0.8935	1.37872	1.28042	1.29636	3.75669e-09	2.65007e-09	9.23118e-10	1.5081e-10	FALSE
131.126	positive	0.192132	[13C]C6H15NO	[13C]CHNO_pos	1							0.939606	0.698931	0.00736378	0.904951	0.991594	0.101707	0.00681267	0.000393818	FALSE
131.162	positive	0.15059	[13C]C7H19N	[13C]CHN_pos	0							0.789564	0.904859	2.34181	1.97693	2.71481e-05	6.54392e-06	3.30984e-13	1.64773e-13	TRUE
131.951	positive											0.641531	1.38294	1.45296	1.7842	0.0164705	0.00226099	1.65097e-08	2.09233e-09	FALSE
131.974	positive											1.38709	1.27065	1.75822	1.57913	5.38987e-07	1.97358e-07	5.31952e-09	7.36955e-10	TRUE
131.997	positive											0.406069	1.28055	0.613488	1.04822	0.349592	0.0388385	2.69005e-07	2.7414e-08	FALSE
132.029	positive	-0.106852	C4H5NO4	CHNO4_pos	3							0.759695	1.11745	1.19811	1.30526	0.010467	0.00149587	9.62169e-06	7.70885e-07	FALSE
132.04	positive	-0.0564743	C3H5N3O3	CHN3O3_pos	3							0.967068	0.977988	1.39594	1.70244	3.50882e-08	1.75946e-08	5.21703e-06	4.34647e-07	FALSE
132.044	positive	0.074788	C8H5NO	CHNO_pos	7	indol-2-one	HMDB0253466	Indoles and derivatives		NA		1.33507	0.89458	2.92459	2.16827	1.48995e-07	6.28067e-08	7.09105e-12	2.0788e-12	TRUE
132.048	positive											1.19354	1.07022	2.02816	2.02298	4.00946e-07	1.52075e-07	3.23756e-10	5.94636e-11	TRUE
132.057	positive											0.565486	0.598841	0.294919	0.330165	0.591805	0.0633452	0.22822	0.0116411	FALSE
132.062	positive											0.542723	0.64278	0.766592	0.719611	0.0466619	0.00595317	0.00175616	0.000107381	FALSE
132.066	positive	0.00457812	C5H9NO3	CHNO3_pos	2	hypro propionylglycine aminolevulinic acid hydroxyproline 1-hydroxypyrrolidine-3-carboxylic acid 2-amino-4-oxopentanoic acid 3-hydroxypyrrolidine-2-carboxylic acid 4-amino-5-oxo-pentanoic acid glutaramic acid 5-hydroxypyrrolidine-2-carboxylic acid 2-acetamidopropanoic acid	HMDB0000725 HMDB0000783 HMDB0001149 HMDB0243901 HMDB0243902 HMDB0244991 HMDB0245903 HMDB0246349 HMDB0246746 HMDB0246811 HMDB0255053	Carboxylic acids and derivatives Carboxylic acids and derivatives Carboxylic acids and derivatives Carboxylic acids and derivatives Pyrrolidines Carboxylic acids and derivatives Carboxylic acids and derivatives Carboxylic acids and derivatives Fatty Acyls Carboxylic acids and derivatives Carboxylic acids and derivatives	C01157 C00430	NA NA Glycine, serine and threonine metabolism | Porphyrin Metabolism NA NA NA NA NA NA NA NA	Glycine, serine and threonine metabolism | Porphyrin Metabolism	1.10474	1.28286	1.28568	1.24973	6.50984e-10	6.34451e-10	1.79143e-15	4.67007e-15	FALSE
132.074	positive	-0.0396746	[13C]C5H10O3	[13C]CHO3_pos	2							1.27092	1.14123	0.738556	1.43368	2.18139e-05	5.37559e-06	1.43489e-09	2.24003e-10	FALSE
132.077	positive	0.0549327	C4H9N3O2	CHN3O2_pos	2	creatine 3-guanidinopropanoic acid 2-aminosuccinamide 1-propyl-1-nitrosourea	HMDB0000064 HMDB0013222 HMDB0248665 HMDB0255236	Carboxylic acids and derivatives Organonitrogen compounds Carboxylic acids and derivatives Organic carbonic acids and derivatives	C00300 C03065	Arginine and proline metabolism | Glycine, serine and threonine metabolism NA NA NA	Arginine and proline metabolism | Glycine, serine and threonine metabolism	0.956634	0.920734	1.61746	1.92208	2.10035e-11	5.16118e-11	2.35201e-05	1.79429e-06	TRUE
132.081	positive	-0.0427241	C9H9N	CHN_pos	6	1-methylindole 1,2-dihydroisoquinoline 1,2-dihydroquinoline 2-methylindole	HMDB0243941 HMDB0244075 HMDB0244077 HMDB0245234	Indoles and derivatives Organonitrogen compounds Quinolines and derivatives Indoles and derivatives		NA NA NA NA		1.3785	0.548349	1.20261	1.21734	0.000503276	9.22712e-05	1.90514e-12	6.88352e-13	FALSE
132.089	positive	-0.0106804	[13C]C9H10	[13C]CH_pos	6							0.856546	0.387334	0.935514	0.30018	7.56626e-06	2.09899e-06	3.77024e-05	2.78763e-06	FALSE
132.092	positive											0.707177	0.619139	0.650265	1.18684	0.307134	0.034536	0.020417	0.00113141	FALSE
132.102	positive	0.039666	C6H13NO2	CHNO2_pos	1	L-isoleucine allo-isoleucine L-leucine caprine aminocaproic acid β-leucine L-(+)-leucine 4-morpholineethanol 3-amino-4-methylpentanoic acid norleucine methyl 2-amino-3-methylbutanoate 5,5-dimethylpyrrolidine-1,2-diol	HMDB0000172 HMDB0000557 HMDB0000687 HMDB0001645 HMDB0001901 HMDB0003640 HMDB0013773 HMDB0060650 HMDB0240479 HMDB0245808 HMDB0251526 HMDB0253926 HMDB0257628	Carboxylic acids and derivatives Carboxylic acids and derivatives Carboxylic acids and derivatives Carboxylic acids and derivatives Fatty Acyls Carboxylic acids and derivatives Carboxylic acids and derivatives Oxazinanes NA Carboxylic acids and derivatives Carboxylic acids and derivatives Carboxylic acids and derivatives Pyrrolidines		Valine, leucine and isoleucine degradation NA Valine, leucine and isoleucine degradation NA NA NA NA NA NA NA NA NA NA	Valine, leucine and isoleucine degradation	1.13834	1.06812	1.12534	1.16384	3.31641e-11	6.87808e-11	3.25782e-13	1.62517e-13	FALSE
132.11	positive	-0.00457656	[13C]C6H14O2	[13C]CHO2_pos	1							0.791148	0.565128	0.153941	-0.393486	0.504053	0.0546405	0.0307806	0.00168112	FALSE
132.138	positive	-0.0777848	C7H17NO	CHNO_pos	0							0.878317	1.07405	2.14699	2.2474	5.49811e-07	2.00472e-07	2.32316e-11	5.78264e-12	TRUE
132.903	positive											1.83124	0.96563	1.3668	1.94068	2.13798e-08	1.15954e-08	1.24836e-10	2.54974e-11	FALSE
132.966	positive											1.26395	1.11337	1.83734	2.1208	3.51478e-08	1.76075e-08	4.16698e-08	4.89699e-09	TRUE
132.981	positive											1.22464	1.10061	1.53869	1.13008	1.89433e-05	4.74029e-06	2.44333e-08	2.99476e-09	FALSE
132.995	positive											1.26453	0.848506	1.44395	1.80684	6.11302e-06	1.73388e-06	1.20311e-09	1.91644e-10	FALSE
133.001	positive											0.708352	0.560717	1.46558	1.00757	0.0622614	0.00779002	0.0256281	0.00140764	FALSE
133.008	positive											1.19767	0.506135	1.00972	1.53131	4.73881e-07	1.75627e-07	0.0927799	0.00489419	FALSE
133.011	positive	-0.981788	[13C]C6HNO2	[13C]CHNO2_pos	8							1.6953	0.851085	2.16634	1.33563	0.00919594	0.00132924	0.000449519	2.92727e-05	FALSE
133.013	positive											1.00987	0.671741	0.738633	1.39174	0.205994	0.0237875	2.06984e-07	2.14268e-08	FALSE
133.017	positive											1.17156	0.799553	1.32578	1.06316	4.68963e-11	8.50182e-11	5.48351e-13	2.45736e-13	FALSE
133.024	positive											0.709649	0.630661	1.09382	1.08013	0.0414821	0.00534095	0.000684974	4.35526e-05	FALSE
133.028	positive	0.0318131	C8H4O2	CHO2_pos	7							1.8065	1.0726	1.39415	0.448801	4.74266e-05	1.08184e-05	0.00116401	7.23416e-05	FALSE
133.035	positive											0.621178	0.798451	2.09389	1.5391	0.00021994	4.33104e-05	0.000179448	1.22276e-05	TRUE
133.05	positive	0.0378667	C5H8O4	CHO4_pos	2	ethylmalonic acid glutaric acid (2S)-2-methylbutanedioic acid 4-methoxy-4-oxobutanoic acid dimethyl malonate formyl 3-hydroxybutanoate	HMDB0000622 HMDB0000661 HMDB0001844 HMDB0246492 HMDB0251386 HMDB0257659	Fatty Acyls Carboxylic acids and derivatives Fatty Acyls Fatty Acyls Carboxylic acids and derivatives Hydroxy acids and derivatives	C00489	NA NA NA NA NA NA		1.01943	1.21186	1.35882	1.20256	5.37454e-09	3.51848e-09	1.18125e-14	1.37026e-14	FALSE
133.052	positive											1.39519	0.722549	3.509	1.83527	2.5277e-05	6.13569e-06	2.81573e-07	2.86107e-08	TRUE
133.061	positive	0.0121163	C4H8N2O3	CHN2O3_pos	2	ureidopropionic acid L-asparagine Gly-Gly methylazoxymethanol acetate [methyl(nitroso)amino]methyl acetate asparagine ethyl N-methylnitrosocarbamate	HMDB0000026 HMDB0000168 HMDB0011733 HMDB0243653 HMDB0246973 HMDB0251512 HMDB0255197	Organic carbonic acids and derivatives Carboxylic acids and derivatives Carboxylic acids and derivatives Allyl-type 1,3-dipolar organic compounds Organonitrogen compounds Carboxylic acids and derivatives Organonitrogen compounds	C02642 C00152 C02037 C16438 C19301	beta-Alanine metabolism | Pyrimidine metabolism Aspartate Metabolism | Nitrogen metabolism NA NA NA NA NA	Aspartate Metabolism | Nitrogen metabolism | beta-Alanine metabolism | Pyrimidine metabolism	1.05022	1.08014	1.61204	1.56014	4.23751e-07	1.59095e-07	3.43593e-09	4.95251e-10	TRUE
133.065	positive	-0.00908695	C9H8O	CHO_pos	6	acrylophenone 3-phenyl-2-propenal 2H-1-benzopyran 4H-1-benzopyran	HMDB0060671 HMDB0243995 HMDB0245299 HMDB0245762 HMDB0246704	Benzene and substituted derivatives Benzene and substituted derivatives Cinnamaldehydes Benzopyrans Benzopyrans	C16592	NA NA NA NA NA		0.654911	0.465823	0.396926	-0.0921979	0.00338733	0.000525679	0.179643	0.0092273	FALSE
133.068	positive											0.404768	1.06332	0.522968	0.925795	0.00183776	0.000299546	3.19034e-09	4.64826e-10	FALSE
133.076	positive	-0.110548	C8H8N2	CHN2_pos	6	1H-indol-2-amine indoleamine 2-methylbenaimidazole 1H-indol-4-amine 5-aminoindole	HMDB0244885 HMDB0244887 HMDB0245225 HMDB0246357 HMDB0246749	Indoles and derivatives Indoles and derivatives Benzimidazoles Indoles and derivatives Indoles and derivatives	C01819	NA NA NA NA NA		1.20529	0.551877	1.86939	-0.15993	0.00276297	0.000435299	0.247879	0.0125961	FALSE
133.084	positive	0.375539	[13C]C8H9N	[13C]CHN_pos	6							0.673983	0.378963	1.532	1.4217	7.63564e-07	2.69686e-07	5.52291e-09	7.62518e-10	FALSE
133.086	positive	-0.0030285	C6H12O3	CHO3_pos	1	2-hydroxy-3-methyl-valerate 5-hydroxyhexanoic acid (+)-α-hydroxyisocaproate (S)-3-hydroxyhexanoic acid 1-methoxypropan-2-yl acetate ethoxyethylacetate 3-hydroxybutyl acetate 1-methoxypropyl acetate 1,4-dihydroxy-3,3-dimethylbutan-2-one solketal	HMDB0000317 HMDB0000525 HMDB0000746 HMDB0061652 HMDB0243916 HMDB0245111 HMDB0245894 HMDB0251247 HMDB0254555 HMDB0257729 HMDB0258367	Fatty Acyls Fatty Acyls Fatty Acyls Hydroxy acids and derivatives Carboxylic acids and derivatives Carboxylic acids and derivatives Carboxylic acids and derivatives Organooxygen compounds Carboxylic acids and derivatives Organooxygen compounds Organooxygen compounds		NA NA NA NA NA NA NA NA NA NA NA		1.17397	1.246	1.02467	0.907894	8.72047e-08	3.89446e-08	8.44107e-13	3.52232e-13	FALSE
133.097	positive	0.122644	C5H12N2O2	CHN2O2_pos	1	ornithine L-(-)-ornithine	HMDB0000214 HMDB0003374	Carboxylic acids and derivatives Carboxylic acids and derivatives	C00077 C00515	Arginine and proline metabolism | Glycine, serine and threonine metabolism | Urea Cycle D-Arginine and D-Ornithine Metabolism	Arginine and proline metabolism | Glycine, serine and threonine metabolism | Urea Cycle | D-Arginine and D-Ornithine Metabolism	0.891946	1.13123	1.42398	1.38117	1.83098e-07	7.55246e-08	1.08417e-12	4.29488e-13	FALSE
133.099	positive											0.615117	0.689028	0.246685	-0.0688003	0.555863	0.059844	0.732276	0.0357068	FALSE
133.101	positive	0.0257393	C10H12	CH_pos	5	tetralin tricyclo[5.2.1.0^{2,6}]deca-3,8-diene	HMDB0244120 HMDB0251216	Tetralins Polycyclic hydrocarbons	C14114 C14411	NA NA		0.710004	1.43048	0.469633	0.417404	0.000211325	4.18525e-05	7.05089e-07	6.70364e-08	FALSE
133.105	positive	-0.0726733	[13C]C5H13NO2	[13C]CHNO2_pos	1							0.933278	0.760491	1.82523	1.63606	4.17422e-07	1.57288e-07	1.17209e-08	1.52203e-09	TRUE
133.122	positive	0.107482	C7H16O2	CHO2_pos	0	heptane-3,4-diol	HMDB0246037	Organooxygen compounds		NA		1.34005	0.398053	0.363911	0.473227	0.51279	0.0555645	0.0339831	0.00185186	FALSE
133.95	positive											0.882235	0.874199	1.15352	1.30578	0.0266464	0.00354253	8.12464e-11	1.74623e-11	FALSE
133.982	positive											0.509827	0.8169	1.20559	1.82078	0.000274421	5.29923e-05	3.34615e-10	6.09959e-11	FALSE
133.994	positive											1.0794	0.753331	1.14217	1.15127	8.78511e-07	3.04477e-07	0.00165382	0.000101353	FALSE
134.003	positive											1.04444	0.867649	2.25092	1.84614	0.0080671	0.00118022	1.56452e-05	1.21533e-06	TRUE
134.008	positive											0.924315	0.452297	1.73878	0.902897	0.0100448	0.00144229	0.051353	0.00276117	FALSE
134.039	positive											1.53529	1.28826	3.45773	2.2282	0.00143564	0.000239191	0.000164459	1.12569e-05	TRUE
134.045	positive	0.0451001	C4H7NO4	CHNO4_pos	2	L-aspartic acid D-aspartic acid iminodiacetic acid	HMDB0000191 HMDB0006483 HMDB0011753	Carboxylic acids and derivatives Carboxylic acids and derivatives Carboxylic acids and derivatives	C00049 C00402 C19911	Arginine and proline metabolism | Aspartate Metabolism | beta-Alanine metabolism | Glutamate Metabolism | Nitrogen metabolism | Purine metabolism | Tyrosine metabolism | Urea Cycle Aspartate Metabolism NA	Arginine and proline metabolism | Aspartate Metabolism | beta-Alanine metabolism | Glutamate Metabolism | Nitrogen metabolism | Purine metabolism | Tyrosine metabolism | Urea Cycle | Aspartate Metabolism	1.02579	1.19452	1.61871	1.12883	1.74937e-11	4.51258e-11	2.69296e-10	5.02606e-11	FALSE
134.06	positive	-0.00150316	C8H7NO	CHNO_pos	6	5-hydroxyindol oxindole 4H-1,2-benzoxazine 2H-1,2-benzoxazine 2,3-dihydro-1H-isoindol-1-one p-tolyl isocyanate	HMDB0059805 HMDB0244886 HMDB0246705 HMDB0249034 HMDB0253647 HMDB0256059	Indoles and derivatives Indoles and derivatives Benzoxazines Benzoxazines Isoindoles and derivatives Benzene and substituted derivatives		NA NA NA NA NA NA		1.60563	0.964031	1.79963	0.80339	2.3327e-12	1.28668e-11	5.64307e-09	7.78222e-10	FALSE
134.068	positive	-0.0450921	[13C]C8H8O	[13C]CHO_pos	6							0.757468	1.38168	0.00639485	-0.721433	0.971078	0.09984	3.36025e-06	2.8807e-07	FALSE
134.071	positive	0.123249	C7H7N3	CHN3_pos	6	1,2-dihydroindazol-3-imine caswell no. 033AA 2-(pyrrol-1-yl)-1H-imidazole	HMDB0244882 HMDB0245008 HMDB0250046	Benzopyrazoles Benzimidazoles Pyrroles	C10901	NA NA NA		0.698724	0.700279	1.21264	0.840489	0.0657935	0.00821016	0.00237802	0.000143451	FALSE
134.073	positive											0.383336	0.268514	-0.641834	0.556457	0.653313	0.069527	0.353461	0.0177126	FALSE
134.081	positive	0.00450877	C5H11NO3	CHNO3_pos	1	2-amino-3-hydroxypentanoic acid amyl nitrate	HMDB0244983 HMDB0256295	Carboxylic acids and derivatives Organic oxoanionic compounds		NA NA		1.0986	1.55634	1.30577	1.43725	3.2834e-10	3.64541e-10	3.60236e-17	5.82241e-16	FALSE
134.089	positive	-0.0390737	[13C]C5H12O3	[13C]CHO3_pos	1							1.18005	0.77861	1.18984	1.16158	6.70931e-05	1.4759e-05	2.16392e-05	1.65549e-06	FALSE
134.096	positive	0.0330605	C9H11N	CHN_pos	5	tranylcypromine sulfate parnate indanamin tetrahydroquinoline 2-aminoindane	HMDB0014890 HMDB0243563 HMDB0243827 HMDB0244122 HMDB0245020	Organonitrogen compounds Organonitrogen compounds Indanes Quinolines and derivatives Indanes	C07155	NA NA NA NA NA		1.05955	0.53468	1.37562	0.341807	4.88114e-10	5.01152e-10	2.77415e-05	2.09458e-06	FALSE
134.105	positive	-0.0105186	[13C]C9H12	[13C]CH_pos	5							0.368755	0.850042	0.301838	0.401983	0.0162866	0.00223693	2.11996e-05	1.62442e-06	FALSE
134.109	positive											0.67026	0.220835	-0.857327	0.250057	0.0288244	0.0038067	0.299395	0.0151032	FALSE
134.118	positive	0.0390654	C6H15NO2	CHNO2_pos	0	diisopropanolamine diisopropanolamine	HMDB0251354 HMDB0257796	Organonitrogen compounds Organonitrogen compounds		NA NA		1.15118	0.898312	1.75114	1.83046	3.09304e-06	9.29146e-07	1.13141e-07	1.21857e-08	TRUE
134.942	positive											1.46199	0.597229	1.27894	1.51894	0.000391715	7.32948e-05	0.000101639	7.13211e-06	FALSE
134.958	positive											0.989377	0.874988	1.17267	1.25617	6.52944e-06	1.84192e-06	4.93319e-12	1.52747e-12	FALSE
134.961	positive											0.946662	0.915779	1.82782	2.24449	7.42535e-06	2.06543e-06	9.0307e-09	1.20364e-09	TRUE
134.966	positive											1.03893	1.77275	1.70357	1.15543	1.02365e-07	4.48646e-08	3.52106e-16	1.47181e-15	FALSE
134.987	positive											0.669361	0.74174	1.07175	1.10989	1.42903e-08	8.1065e-09	7.19364e-10	1.2003e-10	FALSE
134.996	positive											0.674003	1.09375	1.84712	2.65972	9.14387e-07	3.14598e-07	3.03101e-11	7.32644e-12	TRUE
135.008	positive	0.295522	C7H2O3	CHO3_pos	7							0.423729	0.506763	1.2174	1.17882	0.00295747	0.000463408	3.71919e-05	2.75324e-06	FALSE
135.014	positive											0.458352	1.15625	0.863003	0.962002	0.146537	0.0173703	0.000849835	5.35157e-05	FALSE
135.022	positive											0.844312	0.518059	0.28595	1.14597	0.779957	0.0818622	0.0638774	0.00340663	FALSE
135.023	positive											1.18658	0.810775	1.08726	0.962111	4.3257e-10	4.52183e-10	0.0196747	0.00109102	FALSE
135.044	positive	-0.0432717	C8H6O2	CHO2_pos	6	2,2'-bifuran phthalaldehyde	HMDB0245350 HMDB0255866 HMDB0256408	Heteroaromatic compounds Benzene and substituted derivatives Benzene and substituted derivatives		NA NA NA		1.16481	0.479175	0.629811	0.212876	9.44933e-07	3.23391e-07	0.000972997	6.08604e-05	FALSE
135.05	positive											1.59703	0.68945	1.30504	1.22384	7.60598e-11	1.20232e-10	1.83842e-11	4.72149e-12	FALSE
135.055	positive	0.00596801	C7H6N2O	CHN2O_pos	6	1H-indazol-3-ol N-iminobenzamide	HMDB0244883 HMDB0249039	Benzopyrazoles Benzene and substituted derivatives		NA NA		1.06061	0.51434	2.42414	0.597685	0.000110875	2.33404e-05	0.0131529	0.000739691	FALSE
135.063	positive	0.261085	[13C]C7H7NO	[13C]CHNO_pos	6							1.52057	0.610078	2.10378	1.08865	0.00195005	0.000316457	6.79086e-05	4.86808e-06	FALSE
135.065	positive	-0.0372973	C5H10O4	CHO4_pos	1	acetin 1,3-dihydroxypropan-2-yl acetate 2-(hydroxymethyl)oxolane-3,4-diol 3,4,5-trihydroxypentanal 2,3,4-trihydroxypentanal	HMDB0243948 HMDB0244105 HMDB0244194 HMDB0245099 HMDB0246776	Glycerolipids Glycerolipids Organooxygen compounds Organooxygen compounds Organooxygen compounds		NA NA NA NA NA		1.10344	1.29858	0.99309	1.39342	9.17282e-08	4.06844e-08	4.70583e-11	1.08967e-11	FALSE
135.068	positive											1.4138	0.79332	2.29988	1.98082	1.37481e-08	7.8332e-09	6.77965e-11	1.48883e-11	TRUE
135.075	positive	1.72749	[13C]C6H7N3	[13C]CHN3_pos	6							1.02692	1.0284	1.21477	1.00836	5.53982e-05	1.24667e-05	6.26252e-06	5.15901e-07	FALSE
135.079	positive											1.14869	1.49267	-1.0822	-1.04331	0.100501	0.012192	3.02574e-05	2.26759e-06	FALSE
135.08	positive	-0.00895034	C9H10O	CHO_pos	5	chroman isochroman	HMDB0250202 HMDB0253618	Benzopyrans Benzopyrans		NA NA		0.575021	0.733218	0.215188	0.261025	0.239668	0.0274075	0.000561277	3.60946e-05	FALSE
135.085	positive	-0.0313252	[13C]C4H11NO3	[13C]CHNO3_pos	1							0.942546	1.41527	2.49716	2.56086	0.000113938	2.39463e-05	3.78123e-09	5.40842e-10	TRUE
135.092	positive	0.0402731	C8H10N2	CHN2_pos	5	1,2,3,4-tetrahydroquinoxaline	HMDB0244123	Organonitrogen compounds		NA		0.479216	0.660569	1.05152	-0.0221754	0.000106465	2.25034e-05	0.887305	0.0427843	FALSE
135.1	positive	-0.152134	[13C]C8H11N	[13C]CHN_pos	5							0.942147	0.751418	1.49082	0.191595	0.00148933	0.000247501	0.274403	0.0139119	FALSE
135.102	positive	-0.00298298	C6H14O3	CHO3_pos	0	diglyme trimethylolpropane	HMDB0251284 HMDB0259243	Organooxygen compounds Organooxygen compounds		NA NA		1.04226	0.999949	0.975868	0.715715	5.26806e-07	1.93444e-07	2.83514e-08	3.44539e-09	FALSE
135.115	positive											0.880728	0.689861	0.921865	0.802176	0.00377359	0.000580066	2.84848e-05	2.14336e-06	FALSE
135.117	positive	0.0253524	C10H14	CH_pos	4	O-diethylbenzene 1,2,3,5-tetramethylbenzene durene T-butylbenzene	HMDB0244072 HMDB0244133 HMDB0244147 HMDB0258847	Benzene and substituted derivatives Benzene and substituted derivatives Benzene and substituted derivatives Benzene and substituted derivatives	C14534	NA NA NA NA		1.00244	1.33225	0.591452	0.524332	5.35206e-06	1.53739e-06	6.8209e-10	1.14362e-10	FALSE
135.119	positive											0.633771	0.342369	0.672271	0.24055	0.0500174	0.00634846	0.337267	0.0169396	FALSE
135.945	positive											1.05885	1.37627	0.999676	0.975597	2.72855e-06	8.2975e-07	2.71305e-15	5.52736e-15	FALSE
135.956	positive											0.903444	0.97289	1.27208	1.56823	0.00522417	0.000788551	5.18994e-11	1.18816e-11	FALSE
135.969	positive											0.738098	0.7796	1.83465	1.862	4.12669e-05	9.51376e-06	5.87905e-10	1.00659e-10	TRUE
135.999	positive											1.12975	1.06668	1.23782	1.04917	1.29367e-08	7.4528e-09	2.36685e-06	2.07681e-07	FALSE
136.019	positive											0.749661	0.341875	1.33162	0.17842	3.96139e-05	9.18165e-06	0.452056	0.0224676	FALSE
136.022	positive											0.752914	0.679575	0.497045	0.384262	0.000507247	9.29006e-05	1.48859e-05	1.15969e-06	FALSE
136.024	positive											0.990307	0.851069	-0.598097	0.783532	0.110353	0.0133062	0.0180648	0.00100428	FALSE
136.039	positive	0.0385094	C7H5NO2	CHNO2_pos	6	2H-1,2-benzoxazol-3-one	HMDB0032931 HMDB0249006	Benzoxazoles Benzisoxazoles		NA NA		1.64913	0.985714	1.6601	1.55343	1.40213e-07	5.93945e-08	3.81176e-07	3.79052e-08	TRUE
136.047	positive	0.0696089	[13C]C7H6O2	[13C]CHO2_pos	6							0.188071	1.03031	0.257681	-0.362221	0.260714	0.0296572	0.00170131	0.000104106	FALSE
136.051	positive											0.649498	0.438075	2.10626	0.78515	0.0433249	0.00556302	0.00656306	0.000379933	FALSE
136.055	positive											0.886111	0.703837	1.54462	2.57655	4.40255e-11	8.18162e-11	2.2191e-07	2.28548e-08	TRUE
136.06	positive	0.044427	C4H9NO4	CHNO4_pos	1							0.933015	1.23753	1.79108	2.26267	1.01644e-09	9.16541e-10	1.13062e-12	4.44261e-13	TRUE
136.064	positive											0.988264	0.299657	1.4652	1.14413	5.89648e-06	1.68259e-06	3.01257e-11	7.30371e-12	FALSE
136.076	positive	-0.00148073	C8H9NO	CHNO_pos	5	3-methylbenzamide 4-aminoacetophenone	HMDB0245928 HMDB0246623	Benzene and substituted derivatives Organooxygen compounds		NA NA		1.44034	0.983375	0.852158	0.447631	3.17548e-08	1.62853e-08	3.02123e-07	3.05069e-08	FALSE
136.084	positive	0.0296128	[13C]C8H10O	[13C]CHO_pos	5							0.754941	0.278162	0.0569458	0.167205	0.751385	0.0791839	0.0912765	0.00481698	FALSE
136.088	positive											0.332941	0.3443	-0.0997644	0.0558963	0.884317	0.0917384	0.813684	0.0394778	FALSE
136.097	positive	0.0044415	C5H13NO3	CHNO3_pos	0							0.786186	1.34399	1.71245	2.08177	2.90734e-07	1.1472e-07	8.7254e-12	2.47705e-12	TRUE
136.105	positive	0.10955	[13C]C5H14O3	[13C]CHO3_pos	0							1.28074	0.70924	1.14443	1.93533	0.000156115	3.19054e-05	0.0441228	0.00238511	FALSE
136.112	positive	0.0325673	C9H13N	CHN_pos	4	adderall amphetamine 3-phenyl propylamine N-isopropylaniline N,N,4-trimethylaniline dimethylbenzylamine	HMDB0014328 HMDB0015516 HMDB0245973 HMDB0255164 HMDB0255257 HMDB0255260	Benzene and substituted derivatives Benzene and substituted derivatives Benzene and substituted derivatives Organonitrogen compounds Benzene and substituted derivatives Benzene and substituted derivatives	C07514 C07884	NA NA NA NA NA NA		0.973081	0.915111	1.18493	0.593166	2.76345e-08	1.45611e-08	6.20991e-09	8.52515e-10	FALSE
136.12	positive	-0.0103617	[13C]C9H14	[13C]CH_pos	4							0.671261	1.17266	0.499251	0.551135	3.41848e-05	8.02736e-06	9.50754e-10	1.54803e-10	FALSE
136.125	positive											0.192719	1.24026	-0.0760753	0.362153	0.918762	0.0950075	0.235224	0.0119832	FALSE
136.133	positive	-0.0355224	C6H17NO2	CHNO2_pos	-1							1.00837	0.790286	0.94412	1.71154	0.00185374	0.000301866	3.75113e-07	3.73635e-08	FALSE
136.954	positive											0.985483	1.74956	1.34105	0.965946	0.000458263	8.44965e-05	1.30222e-06	1.18913e-07	FALSE
137.019	positive											0.693059	1.31724	0.397736	1.01692	0.423608	0.0465035	0.000536258	3.45774e-05	FALSE
137.022	positive	-0.00294087	[13C]C9HN	[13C]CHN_pos	11							0.635654	1.64063	0.977403	0.939878	0.0373138	0.00483791	1.61597e-05	1.25369e-06	FALSE
137.023	positive	-0.00294083	C7H4O3	CHO3_pos	6	furo[3,2-c]pyran-4-one	HMDB0252541	Furopyrans		NA		1.29562	0.996778	1.51319	1.27447	0.000141779	2.91942e-05	1.93612e-08	2.42582e-09	FALSE
137.025	positive											0.750036	0.70872	0.791589	0.39982	0.0110554	0.00157345	7.05917e-06	5.77018e-07	FALSE
137.034	positive											0.315912	0.564758	0.879067	1.16935	0.344363	0.0383151	0.000247659	1.66232e-05	FALSE
137.039	positive	0.0249942	C11H4	CH_pos	10							1.02146	0.72741	1.2953	0.925575	1.0242e-08	6.02766e-09	1.2624e-05	9.96605e-07	FALSE
137.048	positive											0.620433	1.12365	1.73493	1.41429	0.0465524	0.00594212	0.000279799	1.86668e-05	FALSE
137.057	positive											0.763493	0.714315	-0.803839	0.731668	0.2276	0.0261022	0.0434765	0.00235279	FALSE
137.06	positive	0.0308705	C8H8O2	CHO2_pos	5	ω-phenylacetic acid 1,4-benzodioxan hydroxyacetophenone oxonin-2-ol	HMDB0000209 HMDB0244196 HMDB0245150 HMDB0256000	Benzene and substituted derivatives Benzodioxanes Organooxygen compounds NA	C07086 C07189	Phenylalanine metabolism NA NA NA	Phenylalanine metabolism	0.721599	1.19756	0.595739	0.492239	1.37293e-05	3.5433e-06	3.6974e-09	5.3073e-10	FALSE
137.063	positive											0.696539	1.03593	1.32978	-0.014156	0.00856758	0.00124851	0.955517	0.0459	FALSE
137.071	positive	0.0058796	C7H8N2O	CHN2O_pos	5	N'methylnicotinamide 3-aminobenzenecarboximidic acid 4-aminobenzamide 4-hydroxybenzenecarboximidamide 5-methylpyridine-3-carboxamide N-hydroxybenzenecarboximidamide benzenecarbohydrazonic acid	HMDB0003152 HMDB0245814 HMDB0246352 HMDB0246448 HMDB0246826 HMDB0248971 HMDB0249018	Pyridines and derivatives Benzene and substituted derivatives Benzene and substituted derivatives Phenols Pyridines and derivatives Benzene and substituted derivatives Benzene and substituted derivatives		NA NA NA NA NA NA NA		1.0671	0.975942	1.03177	0.317134	8.92387e-08	3.97161e-08	0.000541449	3.48936e-05	FALSE
137.079	positive	0.110236	[13C]C7H9NO	[13C]CHNO_pos	5							0.641717	1.20501	0.750367	0.212174	0.0114255	0.00162169	0.291923	0.0147354	FALSE
137.081	positive	-0.0367448	C5H12O4	CHO4_pos	0	2-methylbutane-1,2,3,4-tetrol	HMDB0245046	Organooxygen compounds		NA		0.781606	1.11803	1.33558	1.18042	0.0132741	0.00186063	2.58224e-06	2.2479e-07	FALSE
137.094	positive											0.780234	0.560771	0.169289	-0.0631679	0.85353	0.088829	0.816194	0.0395917	FALSE
137.096	positive	-0.00881777	C9H12O	CHO_pos	4							0.922772	0.80214	0.429653	0.282828	0.000165957	3.36778e-05	9.83298e-05	6.90392e-06	FALSE
137.107	positive	-0.0337987	C8H12N2	CHN2_pos	4	phenelzine betahistine dimethyl-p-phenylenediamine N1,N1-dimethylbenzene-1,2-diamine	HMDB0014918 HMDB0015644 HMDB0247696 HMDB0255291	Benzene and substituted derivatives Organonitrogen compounds Organonitrogen compounds Organonitrogen compounds	C07430 C04203	NA NA NA NA		0.429465	0.62878	0.564375	0.538124	0.000128873	2.67813e-05	1.74504e-07	1.83306e-08	FALSE
137.115	positive	-0.0764098	[13C]C8H13N	[13C]CHN_pos	4							1.25791	0.858045	1.73267	0.621701	0.000330262	6.29085e-05	0.000362441	2.38779e-05	FALSE
137.124	positive											0.455114	0.113315	-0.377501	0.0549336	0.610657	0.0652016	0.817619	0.0396529	FALSE
137.13	positive											0.433121	0.43911	1.30199	0.293157	0.18321	0.0212987	0.312795	0.0157463	FALSE
137.132	positive	-0.0484848	C10H16	CH_pos	3	α-limonene adamantane 1-methylidene-4-(prop-1-en-2-yl)cyclohexane	HMDB0003375 HMDB0247997 HMDB0256049	Prenol lipids Polycyclic hydrocarbons Prenol lipids	C06099	NA NA NA		0.627643	0.831212	0.807153	0.602744	3.48786e-08	1.75575e-08	2.09641e-10	4.02739e-11	FALSE
137.135	positive											0.4277	0.469465	1.32895	0.240198	0.187424	0.0217594	0.469901	0.0233163	FALSE
137.136	positive											0.548296	0.344384	1.66595	0.258085	0.0340058	0.00444122	0.449053	0.0223321	FALSE
137.954	positive											0.892083	0.88084	1.11493	1.42445	0.000604162	0.000108843	3.67496e-12	1.18637e-12	FALSE
137.957	positive											0.684235	0.944359	1.61022	1.40072	3.40259e-06	1.01333e-06	6.4883e-10	1.09467e-10	FALSE
137.971	positive											0.616412	0.33634	1.79938	1.08161	0.00136027	0.000228248	0.0160188	0.00089464	FALSE
137.998	positive											0.373297	1.24617	1.24388	1.69567	0.0792069	0.00974558	0.00599763	0.000348866	FALSE
138.017	positive											0.802989	0.672077	0.452173	0.383218	0.000743028	0.000131665	2.22302e-05	1.6991e-06	FALSE
138.028	positive											0.836195	0.996686	0.0526923	-0.0342173	0.913982	0.094551	0.903604	0.0435183	FALSE
138.031	positive											0.587438	0.514055	1.25879	-0.11193	0.0693642	0.00863288	0.687186	0.0335689	FALSE
138.034	positive											1.20756	1.40524	2.19255	3.32719	1.33684e-06	4.40366e-07	7.30921e-05	5.22576e-06	TRUE
138.042	positive											1.09781	0.837131	1.245	1.76776	3.05196e-10	3.46259e-10	4.43603e-06	3.733e-07	FALSE
138.045	positive											0.583729	0.95986	1.46128	1.87943	0.000135042	2.79401e-05	0.00726397	0.000418311	FALSE
138.051	positive											0.991009	0.690243	1.72485	2.12066	3.36493e-09	2.41311e-09	8.77877e-08	9.65671e-09	TRUE
138.055	positive	-0.0350243	C7H7NO2	CHNO2_pos	5	trigonelline 2-aminobenzoic acid sunbrella 3-pyridylacetic acid gabaculine salicylamide pyridin-2-ylacetic acid 2-[(hydroxyimino)methyl]phenol 2-nitrotoluene 3-nitrotoluene 4-methylpyridine-3-carboxylic acid 4-nitrotoluene 6-methylpyridine-2-carboxylic acid 1-methylpyridin-1-ium-2-carboxylate benzhydroxamic acid O-phenyl carbamate	HMDB0000875 HMDB0001123 HMDB0001392 HMDB0001538 HMDB0001891 HMDB0015687 HMDB0060722 HMDB0245151 HMDB0245268 HMDB0245952 HMDB0246513 HMDB0246551 HMDB0247665 HMDB0253198 HMDB0255153 HMDB0256423	Benzene and substituted derivatives Benzene and substituted derivatives Pyridines and derivatives Benzene and substituted derivatives Phenols Pyridines and derivatives Phenols Benzene and substituted derivatives Benzene and substituted derivatives Pyridines and derivatives Benzene and substituted derivatives Pyridines and derivatives Pyridines and derivatives Benzene and substituted derivatives B…	C01004 C00108 C00568 C19597 C19486 C14394	NA Tryptophan metabolism NA NA NA NA NA NA NA NA NA NA NA NA NA NA	Tryptophan metabolism	1.75643	1.36569	1.1269	0.891715	5.92977e-10	5.86741e-10	1.69746e-13	9.98872e-14	FALSE
138.058	positive											0.463922	0.681028	1.60086	2.32681	1.24444e-11	3.68702e-11	9.62299e-11	2.01993e-11	TRUE
138.063	positive	-0.00437778	[13C]C7H8O2	[13C]CHO2_pos	5							0.241636	0.41099	0.315173	0.322073	0.00824509	0.00120558	9.1584e-05	6.44709e-06	FALSE
138.068	positive											0.33657	1.09948	-0.555437	-1.42046	0.0203629	0.00275377	3.3684e-05	2.51042e-06	FALSE
138.076	positive	0.0437736	C4H11NO4	CHNO4_pos	0							0.872181	1.28722	1.39319	1.90846	4.38723e-05	1.00741e-05	3.27297e-08	3.93213e-09	FALSE
138.091	positive	-0.00145896	C8H11NO	CHNO_pos	4	tyramine β phenylethanolamine m-tyramine 4-hydroxy-2,6-dimethylaniline (+-)-phenylethanolamine 2-(dimethylamino)phenol 2-ethyl-6-methylpyridin-3-ol para-cresidine 4-dimethylaminophenol 4-amino-2,3-dimethylphenol P-ethoxyaniline phenylethanolamin 1-phenoxyethanamine 2-ethyl-1-methylpyridin-4-one 2-ethoxyaniline	HMDB0000306 HMDB0001065 HMDB0004989 HMDB0060681 HMDB0245030 HMDB0245103 HMDB0245115 HMDB0245200 HMDB0246306 HMDB0246343 HMDB0246417 HMDB0248220 HMDB0248329 HMDB0250513 HMDB0255863	Benzene and substituted derivatives Organonitrogen compounds Benzene and substituted derivatives Phenols Organonitrogen compounds Organonitrogen compounds Pyridines and derivatives Phenol ethers Organonitrogen compounds Phenols Phenol ethers Benzene and substituted derivatives Phenol ethers Pyridines and derivatives Phenol ethers	C00483 C02735 C16570 C19216	Tyrosine metabolism NA NA NA NA NA NA NA NA NA NA NA NA NA NA	Tyrosine metabolism	1.21897	0.676229	0.938431	0.52733	2.31725e-08	1.24505e-08	5.13532e-08	5.93429e-09	FALSE
138.099	positive	0.0291775	[13C]C8H12O	[13C]CHO_pos	4							0.35263	0.987796	0.160485	0.0413648	0.190939	0.0221376	0.559272	0.0275591	FALSE
138.104	positive											0.520061	0.779048	0.389679	0.893837	0.351261	0.0390156	0.00753167	0.000433007	FALSE
138.111	positive	0.0773139	[13C]C7H12N2	[13C]CHN2_pos	4							0.32273	0.125094	0.746426	0.205031	0.0291685	0.00384724	0.0949836	0.00500608	FALSE
138.112	positive	0.0773129	C5H15NO3	CHNO3_pos	-1							0.820963	1.02774	2.26361	2.12074	0.025035	0.00333943	7.57528e-07	7.1573e-08	TRUE
138.128	positive	0.105017	C9H15N	CHN_pos	3	2-pentyl-1H-pyrrole	HMDB0256996	Pyrroles		NA		0.390271	0.880781	0.265927	-0.626509	0.184718	0.0214644	0.000260106	1.74104e-05	FALSE
138.136	positive	-0.0102094	[13C]C9H16	[13C]CH_pos	3							0.623744	0.819344	0.806963	0.588558	3.92349e-08	1.95042e-08	5.86093e-10	1.00419e-10	FALSE
138.139	positive											0.22943	0.225593	0.222588	0.433429	0.490304	0.0532392	0.0076173	0.000437515	FALSE
138.954	positive											0.629755	0.911745	1.40725	1.3831	0.0040228	0.000615636	6.82837e-09	9.27441e-10	FALSE
138.957	positive											0.862552	0.911187	1.69043	1.30883	0.00382807	0.000587919	2.62006e-07	2.6757e-08	FALSE
138.982	positive											0.740383	0.843253	1.01326	1.2963	5.742e-05	1.2877e-05	0.00848414	0.000485464	FALSE
138.991	positive											0.754329	1.35186	1.25752	1.12889	2.43932e-10	2.88758e-10	7.97496e-18	6.44487e-16	FALSE
138.998	positive											0.943968	1.1086	1.62181	0.884482	0.0176294	0.00240987	0.00865805	0.000495064	FALSE
139.018	positive											0.839707	0.808543	1.42594	2.3715	8.18066e-08	3.68513e-08	2.05004e-05	1.57383e-06	FALSE
139.021	positive											0.969744	0.980615	-0.41494	0.00272907	0.122419	0.0146691	0.992333	0.0475648	FALSE
139.029	positive											0.71875	0.772758	1.20501	1.77851	5.7421e-10	5.69257e-10	8.9613e-05	6.32303e-06	FALSE
139.035	positive											1.38531	0.792559	1.27279	0.990396	1.63663e-09	1.34481e-09	4.9671e-15	7.52645e-15	FALSE
139.037	positive											0.58366	1.43603	0.959386	1.44951	1.92859e-07	7.90478e-08	4.9363e-12	1.52649e-12	FALSE
139.039	positive	-0.075345	C7H6O3	CHO3_pos	5	salicylic 3-hydroxybenzoic acid 3,4-dihydroxybenzaldehyde 3,6-dihydroxycyclohepta-2,4,6-trien-1-one	HMDB0000500 HMDB0001895 HMDB0002466 HMDB0059965 HMDB0260262	Benzene and substituted derivatives Benzene and substituted derivatives Benzene and substituted derivatives Organooxygen compounds Tropones	C00156 C00805 C00587 C16700	Ubiquinone Biosynthesis NA NA NA NA	Ubiquinone Biosynthesis	0.917446	1.07576	0.794481	0.696828	9.80066e-05	2.09289e-05	4.35596e-11	1.01937e-11	FALSE
139.043	positive											1.03934	0.749723	1.27811	0.96535	5.88717e-09	3.76843e-09	0.0104878	0.00059492	FALSE
139.05	positive	0.0449136	C6H6N2O2	CHN2O2_pos	5	trans-urocanic acid 3-pyridinecarboxamide, 1-oxide 3-aminopicolinic acid 3-nitroaniline 4-hydroxypyridine-3-carboxamide p-nitroaniline 5-methylpyrazine-2-carboxylic acid 6-oxo-1H-pyridine-3-carboxamide benzenamine, N-nitro- hydroxy(phenyl-oxo-$l^{5}-azanylidene)amine nicoxamat 2-oxopyridine-1-carboxamide 3-aminophenyl nitrite	HMDB0000301 HMDB0002730 HMDB0245821 HMDB0245944 HMDB0246459 HMDB0246529 HMDB0246827 HMDB0247081 HMDB0255196 HMDB0255198 HMDB0255593 HMDB0256972 HMDB0257879	Azoles Pyridines and derivatives Pyridines and derivatives Benzene and substituted derivatives Pyridines and derivatives Benzene and substituted derivatives Diazines Pyridines and derivatives Benzene and substituted derivatives Benzene and substituted derivatives Pyridines and derivatives Pyridines and derivatives Benzene and substituted derivatives	C00785 C02126	Histidine metabolism | Nitrogen metabolism NA NA NA NA NA NA NA NA NA NA NA NA	Histidine metabolism | Nitrogen metabolism	0.963309	1.43229	1.27284	1.08592	1.14747e-11	3.5204e-11	2.20547e-14	2.09685e-14	FALSE
139.058	positive	-0.141976	[13C]C6H7NO2	[13C]CHNO2_pos	5							0.427279	0.966673	0.58278	1.16484	0.318266	0.0356949	2.15466e-05	1.64996e-06	FALSE
139.07	positive	1.64419	[13C]C5H7N3O	[13C]CHN3O_pos	5							0.412357	0.533515	1.10687	0.928723	0.026552	0.00353088	0.000649266	4.14562e-05	FALSE
139.073	positive											0.76732	1.03796	0.906675	1.54163	0.000375469	7.05094e-05	2.6151e-08	3.194e-09	FALSE
139.075	positive	0.0304198	C8H10O2	CHO2_pos	4	tyrosol	HMDB0004284	Phenols	C06044	NA		1.26552	0.817597	0.637714	0.299209	5.01628e-07	1.84591e-07	4.14754e-05	3.04892e-06	FALSE
139.087	positive	0.150638	C7H10N2O	CHN2O_pos	4	1-methyl-2H-pyridine-3-carboxamide 2,4 diaminoanisole 3-(hydrazinylmethyl)phenol	HMDB0243919 HMDB0245445 HMDB0245893	Pyridines and derivatives Phenol ethers Phenols	C19218	NA NA NA		0.849268	0.853072	1.50297	1.20962	3.04991e-05	7.2572e-06	2.47097e-07	2.52877e-08	FALSE
139.095	positive	-0.181045	[13C]C7H11NO	[13C]CHNO_pos	4							0.844308	0.528725	0.890132	0.0832197	0.0791745	0.0097439	0.674303	0.0329728	FALSE
139.109	positive											1.53995	1.24988	-1.73063	-0.105902	0.00258959	0.000410603	0.691306	0.0337565	FALSE
139.112	positive	-0.00868907	C9H14O	CHO_pos	3	foron	HMDB0245519	Organooxygen compounds		NA		1.02769	0.980442	0.550391	0.459957	8.54768e-05	1.84816e-05	4.3772e-09	6.17344e-10	FALSE
139.115	positive											1.78894	1.28588	-1.71901	-0.0826047	0.00634251	0.000945248	0.736551	0.0358936	FALSE
139.139	positive											0.266032	0.267385	0.548797	0.50744	0.00368375	0.000568447	2.50853e-05	1.9059e-06	FALSE
139.148	positive	0.0246126	C10H18	CH_pos	2	1,9-decadiene camphane decalin pinane	HMDB0244254 HMDB0249348 HMDB0250288 HMDB0256559	Unsaturated hydrocarbons Prenol lipids Polycyclic hydrocarbons Prenol lipids		NA NA NA NA		0.635142	0.676551	0.4252	0.214348	0.06728	0.00837952	0.0956524	0.00504023	FALSE
139.995	positive											0.638214	0.871206	1.30562	1.578	0.0234322	0.00313612	6.66619e-09	9.08467e-10	FALSE
140.032	positive											0.488362	1.19335	1.14158	1.37124	0.196836	0.0227807	2.13859e-07	2.20631e-08	FALSE
140.034	positive	0.00431571	C6H5NO3	CHNO3_pos	5	P-nitrophenol 3-hydroxypicolinic acid o-nitrophenol 3-nitrophenol	HMDB0001232 HMDB0013188 HMDB0245260 HMDB0245949	Phenols Pyridines and derivatives Phenols Phenols	C00870 C18620 C01988 C14418	NA NA NA NA		1.41523	1.01149	1.31663	1.19986	1.5222e-10	1.97805e-10	3.60652e-11	8.58066e-12	FALSE
140.038	positive											0.881421	0.765453	1.27779	1.44951	1.78779e-06	5.69029e-07	1.15717e-08	1.50426e-09	FALSE
140.042	positive	-0.0374006	[13C]C6H6O3	[13C]CHO3_pos	5							0.432778	0.234126	0.836157	0.409826	0.0283314	0.00374828	0.00185639	0.000113195	FALSE
140.053	positive											1.17975	0.903903	2.18048	1.12285	3.31929e-05	7.82278e-06	1.72681e-06	1.54883e-07	FALSE
140.071	positive	-0.0345166	C7H9NO2	CHNO2_pos	4	3-[(aminooxy)methyl]phenol 3-(1H-pyrrol-2-yl)propanoic acid ferriprox N-hydroxy-1-phenylmethanehydroxylamine 3-hydroxy-2,5-dimethyl-3H-pyridin-4-one gabaculine	HMDB0245766 HMDB0245768 HMDB0250932 HMDB0251340 HMDB0251390 HMDB0251519	Phenols Pyrroles Pyridines and derivatives Benzene and substituted derivatives Pyridines and derivatives Carboxylic acids and derivatives	C12110	NA NA NA NA NA NA		1.39695	1.14708	1.15436	0.789562	6.09761e-11	1.01332e-10	7.84654e-09	1.05509e-09	FALSE
140.079	positive	-0.00431433	[13C]C7H10O2	[13C]CHO2_pos	4							0.79099	1.05424	0.449966	0.102508	0.000232325	4.55417e-05	0.332164	0.0166937	FALSE
140.107	positive	-0.00143782	C8H13NO	CHNO_pos	3							1.11679	1.1625	0.885935	1.23541	3.46292e-08	1.74488e-08	2.18104e-11	5.46256e-12	FALSE
140.115	positive	0.0287547	[13C]C8H14O	[13C]CHO_pos	3							0.999254	1.04004	0.523682	0.47483	0.000125243	2.61106e-05	2.34106e-09	3.48844e-10	FALSE
140.143	positive	0.175368	C9H17N	CHN_pos	2	quinolizidine	HMDB0257048	Quinolizines		NA		1.82798	0.534605	-1.56232	0.765017	1.38283e-05	3.56176e-06	0.000110925	7.74564e-06	FALSE
140.151	positive	-0.0100615	[13C]C9H18	[13C]CH_pos	2							0.804479	0.296471	-0.0123089	-0.0492229	0.96347	0.0991167	0.854537	0.0412947	FALSE
140.959	positive											0.362207	0.939155	0.927478	1.71394	0.117293	0.0140939	2.14337e-07	2.2103e-08	FALSE
140.996	positive											0.59797	0.874811	2.05835	1.77201	0.0112276	0.00159665	1.33993e-07	1.42856e-08	TRUE
141.016	positive											0.575955	1.42727	1.504	1.53004	0.120437	0.0144549	4.18648e-09	5.92514e-10	FALSE
141.018	positive	0.0357115	C6H4O4	CHO4_pos	5							1.34154	0.753315	1.16079	1.11651	2.27804e-09	1.76027e-09	7.18137e-10	1.19908e-10	FALSE
141.025	positive											0.481331	0.875995	1.83626	1.52215	0.00582282	0.000872563	2.4675e-08	3.01981e-09	TRUE
141.027	positive											0.441256	0.940038	1.50296	1.57372	0.0298123	0.00392618	6.47859e-07	6.18865e-08	TRUE
141.029	positive	0.154261	C5H4N2O3	CHN2O3_pos	5	5-oxo-4H-pyrazine-2-carboxylic acid	HMDB0246812	Diazines		NA		1.7937	1.04227	2.05399	0.993288	3.96476e-06	1.16668e-06	3.07801e-07	3.10415e-08	FALSE
141.037	positive											1.72476	1.79515	-1.17224	-1.25275	0.000260937	5.06147e-05	1.3061e-07	1.39434e-08	FALSE
141.048	positive											0.788756	0.490635	1.95521	1.34886	0.000163664	3.32906e-05	4.93947e-11	1.13942e-11	FALSE
141.052	positive											0.584842	0.940478	1.17754	1.37098	6.62572e-07	2.37741e-07	7.00937e-07	6.6694e-08	FALSE
141.055	positive	-0.00285618	C7H8O3	CHO3_pos	4	1,2-benzenediol, 3-methoxy- 2-methoxybenzene-1,3-diol cycloheptane-1,3,5-trione	HMDB0125538 HMDB0133970 HMDB0250645	Phenols Phenols Organooxygen compounds		NA NA NA		1.61893	1.24854	1.0825	0.83493	2.852e-10	3.27153e-10	8.28153e-14	5.67172e-14	FALSE
141.066	positive	0.0442672	C6H8N2O2	CHN2O2_pos	4	5-imidazolepropionic acid methylimidazoleacetic acid P-miaa (1-methylimidazol-2-yl)acetic acid 1-(2-aminoethyl)pyrrole-2,5-dione 3,5-dimethyl-1H-pyrimidine-2,4-dione 5-ethyl-1,3-dihydropyrimidine-2,4-dione gaboxadol (4-methyl-3H-imidazol-2-yl)acetic acid	HMDB0002271 HMDB0002820 HMDB0004988 HMDB0242285 HMDB0244488 HMDB0245938 HMDB0246786 HMDB0252570 HMDB0257616	Azoles Azoles Azoles Azoles Pyrrolidines Diazines Diazines Organonitrogen compounds Azoles	C20522 C05828 C13693	NA Histidine metabolism NA NA NA NA NA NA NA	Histidine metabolism	1.15842	1.31739	1.52165	1.26245	2.58506e-09	1.94532e-09	1.19001e-11	3.23076e-12	FALSE
141.07	positive	-0.118518	C11H8	CH_pos	8							0.946544	0.636202	0.970326	0.541208	0.000872156	0.000151695	8.89822e-08	9.76595e-09	FALSE
141.089	positive											1.10929	1.15361	-0.0761893	0.287706	0.807322	0.0844778	0.278911	0.0141257	FALSE
141.091	positive	0.0299821	C8H12O2	CHO2_pos	3	2,4-Diene-VPA 2-octynoic acid 4-vinylcyclohexene diepoxide medon	HMDB0060682 HMDB0245278 HMDB0246593 HMDB0251369	Fatty Acyls Fatty Acyls Oxepanes Organooxygen compounds	C16656 C19311	NA NA NA NA		1.11726	1.03952	0.47701	0.419726	4.93656e-05	1.12163e-05	9.2229e-07	8.60667e-08	FALSE
141.093	positive											0.858935	1.25473	0.182662	-0.352901	0.707573	0.0747644	0.14793	0.00767154	FALSE
141.118	positive											1.10445	1.18416	-0.503775	-0.175443	0.13175	0.0157073	0.346056	0.0173667	FALSE
141.127	positive	-0.00856408	C9H16O	CHO_pos	2	(2Z)-non-2-enal 2-nonenal	HMDB0031269 HMDB0255708	Organooxygen compounds Organooxygen compounds		NA NA		1.10542	1.06829	0.0717611	0.374848	0.424205	0.0465493	1.27783e-07	1.36656e-08	FALSE
141.164	positive	0.0242586	C10H20	CH_pos	1							1.07605	0.392546	0.147077	0.168398	0.561449	0.0603828	0.170657	0.00878807	FALSE
141.959	positive											0.485092	0.880566	1.32115	1.6	4.05689e-09	2.80835e-09	1.797e-09	2.72463e-10	FALSE
142.013	positive	-0.170205	C5H3NO4	CHNO4_pos	5							0.214331	0.798112	0.661043	1.46078	0.439208	0.0480533	1.00725e-05	8.05673e-07	FALSE
142.032	positive											0.642039	0.546398	1.42785	1.2053	8.54252e-11	1.28756e-10	6.13107e-13	2.70259e-13	FALSE
142.05	positive	0.00425403	C6H7NO3	CHNO3_pos	4	dimethyl-1,3-oxazole-5-carboxylic acid	HMDB0245693	Azoles		NA		1.38676	1.16144	1.25559	1.2091	3.48817e-11	7.06475e-11	1.81787e-14	1.85179e-14	FALSE
142.058	positive	0.0340303	[13C]C6H8O3	[13C]CHO3_pos	4							0.924923	0.950856	1.22382	0.85374	4.60387e-07	1.71115e-07	1.03798e-08	1.36544e-09	FALSE
142.078	positive											1.33918	0.380589	0.895934	0.184367	0.000115112	2.41539e-05	0.302581	0.0152512	FALSE
142.086	positive	0.0368588	C7H11NO2	CHNO2_pos	3	ethosuximide 2-amino-4-methylidenecyclopentane-1-carboxylic acid	HMDB0014731 HMDB0253367	Pyrrolidines Carboxylic acids and derivatives	C07505	NA NA		1.35489	1.16493	1.08184	0.810936	2.45927e-10	2.90457e-10	1.73664e-09	2.65134e-10	FALSE
142.094	positive	-0.00425269	[13C]C7H12O2	[13C]CHO2_pos	3							1.20304	0.961371	0.424624	0.377535	0.000210981	4.18002e-05	4.75876e-05	3.4782e-06	FALSE
142.099	positive											0.637589	1.02306	-0.598541	0.395951	0.514913	0.0557712	0.211768	0.0108224	FALSE
142.123	positive	-0.00141728	C8H15NO	CHNO_pos	2	tetramethylcyclopropane-1-carboxamide 2-isopropylpent-4-enamide N,N,1,2-tetramethylcyclopropane-1-carboxamide tropin	HMDB0246955 HMDB0248168 HMDB0257885 HMDB0259297	Carboxylic acids and derivatives Fatty Acyls Carboxylic acids and derivatives Tropane alkaloids	C02066	NA NA NA NA		1.32398	1.472	1.15749	1.39042	7.54077e-09	4.63247e-09	5.92281e-10	1.01265e-10	FALSE
142.131	positive	-0.042516	[13C]C8H16O	[13C]CHO_pos	2							1.37648	0.6504	-0.192795	0.238292	0.129785	0.0154943	0.0017891	0.000109285	FALSE
142.939	positive											0.833411	1.38734	1.28513	1.16626	1.43715e-05	3.69434e-06	4.05142e-14	3.34093e-14	FALSE
142.948	positive											0.777807	1.08192	1.37176	1.8029	6.56503e-07	2.3589e-07	2.04538e-12	7.30318e-13	FALSE
142.984	positive											0.62314	1.03967	1.19158	1.59757	0.00293313	0.00046015	8.82271e-13	3.601e-13	FALSE
142.995	positive											0.504417	1.41747	1.22439	1.39082	1.25018e-06	4.14983e-07	5.72348e-06	4.7391e-07	FALSE
143.002	positive											0.758613	1.00423	1.18403	1.18086	2.72255e-06	8.28409e-07	7.56271e-14	5.37688e-14	FALSE
143.03	positive											0.934263	0.870999	0.96818	1.53338	0.0381305	0.00493516	2.37417e-06	2.08248e-07	FALSE
143.032	positive											0.743753	0.992794	1.17165	1.84222	7.49467e-05	1.63755e-05	5.13e-07	5.00695e-08	FALSE
143.034	positive	0.0352047	C6H6O4	CHO4_pos	4	trans, trans-muconic acid 5-hydroxymethyl-2-furoic acid	HMDB0002349 HMDB0002432	Fatty Acyls Furans	C20448	NA NA		1.52982	1.02679	1.24439	0.983278	7.21861e-10	6.81743e-10	2.59929e-13	1.36697e-13	FALSE
143.045	positive	0.0112646	C5H6N2O3	CHN2O3_pos	4	5-hydroxymethyluracil	HMDB0000469	Diazines	C03088	NA		0.708177	0.870934	0.825687	1.09508	0.00729009	0.00107382	1.25456e-06	1.14907e-07	FALSE
143.07	positive	-0.00281565	C7H10O3	CHO3_pos	3	glycidyl methacrylate 2-methylidene-4-(oxiran-2-yl)butanoic acid	HMDB0243756 HMDB0257753	Carboxylic acids and derivatives Fatty Acyls		NA NA		1.20157	1.45349	0.946683	0.874103	1.59034e-10	2.02598e-10	8.84853e-14	5.92611e-14	FALSE
143.072	positive											0.720691	0.596987	0.68157	0.962228	0.0125624	0.00176948	0.0295064	0.00161407	FALSE
143.081	positive	-0.0267466	C6H10N2O2	CHN2O2_pos	3	N-(carbamoylmethyl)-2-methylprop-2-enamide piracetam	HMDB0245677 HMDB0256585	Carboxylic acids and derivatives Carboxylic acids and derivatives		NA NA		1.00821	1.22223	1.29972	1.54545	4.05734e-10	4.30202e-10	8.82051e-13	3.60617e-13	FALSE
143.086	positive	0.0239305	C11H10	CH_pos	7							0.584311	0.90856	0.569697	0.478905	0.000273138	5.27838e-05	3.38645e-08	4.05841e-09	FALSE
143.105	positive											0.930537	1.32844	0.50572	0.944671	0.284368	0.0321363	1.33513e-06	1.21551e-07	FALSE
143.107	positive	0.0295568	C8H14O2	CHO2_pos	2	4-Ene-VPA 2-Ene-VPA 3-Ene-VPA (3E)-2-propylpent-3-enoic acid 1-methylcyclohexane-1-carboxylic acid 2-propyl-2-pentenoic acid tetramethylcyclopropane-1-carboxylic acid cyclopentanepropionic acid butyl 2-methylprop-2-enoate	HMDB0013897 HMDB0013902 HMDB0013903 HMDB0013904 HMDB0243938 HMDB0245305 HMDB0245340 HMDB0245846 HMDB0249475	Fatty Acyls Fatty Acyls Fatty Acyls Fatty Acyls Carboxylic acids and derivatives Fatty Acyls Carboxylic acids and derivatives Carboxylic acids and derivatives Carboxylic acids and derivatives	C16648 C16653 C16654	NA NA NA NA NA NA NA NA NA		1.11351	1.27066	0.544425	0.651919	2.22569e-05	5.46658e-06	7.59729e-12	2.20323e-12	FALSE
143.109	positive											1.00192	0.97435	-0.0177425	0.786199	0.973859	0.100086	0.000613141	3.92633e-05	FALSE
143.118	positive	-0.0647383	C7H14N2O	CHN2O_pos	2							0.780526	0.871186	0.95798	1.51298	0.00052773	9.62781e-05	3.22718e-05	2.40888e-06	FALSE
143.126	positive	0.0351819	[13C]C7H15NO	[13C]CHNO_pos	2							0.797865	1.16537	1.18311	2.4111	0.0110353	0.00157102	9.71345e-08	1.05983e-08	FALSE
143.143	positive	-0.00844263	C9H18O	CHO_pos	1	nonanal 5-nonanone 6,6-dimethylheptanal	HMDB0059835 HMDB0246832 HMDB0254444	Organooxygen compounds Organooxygen compounds Organooxygen compounds		NA NA NA		0.712969	0.987205	0.180128	0.609699	0.0736533	0.00912507	1.536e-09	2.38406e-10	FALSE
143.963	positive											0.487343	0.872071	1.33892	1.93579	1.20822e-06	4.03638e-07	4.40254e-09	6.20197e-10	FALSE
143.997	positive											0.553876	1.17079	1.98993	2.25068	0.00299104	0.000468101	1.43539e-08	1.82964e-09	TRUE
144.005	positive											0.548191	0.763338	1.49489	1.67174	0.000105667	2.23621e-05	4.18713e-09	5.9226e-10	FALSE
144.029	positive	-0.0279678	C5H5NO4	CHNO4_pos	4							1.23574	0.911331	1.39518	1.08761	0.000179507	3.61447e-05	3.65098e-06	3.11234e-07	FALSE
144.037	positive	-0.0685171	[13C]C5H6O4	[13C]CHO4_pos	4							0.626399	0.940925	1.16695	1.31449	0.0169797	0.00232474	0.00014557	1.00319e-05	FALSE
144.048	positive											0.71952	0.425347	1.40232	1.16805	0.00443276	0.00067618	1.91525e-09	2.89306e-10	FALSE
144.066	positive	0.0041941	C6H9NO3	CHNO3_pos	3	trimethadione 5-ethyl-4-hydroxy-5-methyl-1,3-oxazol-2-one 2-hydroxy-2-azabicyclo[3.1.0]hexane-1-carboxylic acid 3-(ethylcarbamoyl)prop-2-enoic acid	HMDB0014491 HMDB0061082 HMDB0254537 HMDB0255136	Azolidines Azolidines Carboxylic acids and derivatives Fatty Acyls		NA NA NA NA		1.50616	1.31037	1.24092	1.18046	1.1173e-12	8.51921e-12	3.56116e-16	1.46335e-15	FALSE
144.074	positive	0.0335509	[13C]C6H10O3	[13C]CHO3_pos	3							1.13604	1.0535	0.97554	1.07648	7.98297e-06	2.19115e-06	1.5951e-07	1.68652e-08	FALSE
144.081	positive	-0.0391407	C10H9N	CHN_pos	7	α naphthylamine benzazepine 8-methylquinoline	HMDB0243964 HMDB0244865 HMDB0247450	Naphthalenes Benzazepines Quinolines and derivatives	C14790	NA NA NA		0.616028	0.543782	0.700923	0.427235	0.00140482	0.000234736	1.36107e-06	1.23773e-07	FALSE
144.084	positive											0.918714	0.444389	1.50601	0.925865	6.59518e-12	2.47792e-11	8.05922e-07	7.59087e-08	FALSE
144.089	positive	-0.0796748	[13C]C10H10	[13C]CH_pos	7							0.829075	0.182739	0.842744	0.0807812	0.00832982	0.0012166	0.521206	0.0257671	FALSE
144.102	positive	-0.0335442	C7H13NO2	CHNO2_pos	2	stachydrine 1,2-dimethylpyrrolidine-2-carboxylic acid 1-aminocyclohexane-1-carboxylic acid 5-hydroxy-2-methylhex-2-enamide 4-aminocyclohexane-1-carboxylic acid 4-(trimethylammonio)but-2-enoate N-(2-hydroxypropyl)-2-methylprop-2-enamide	HMDB0004827 HMDB0243593 HMDB0243822 HMDB0245163 HMDB0246355 HMDB0250545 HMDB0254991	Carboxylic acids and derivatives Carboxylic acids and derivatives Carboxylic acids and derivatives Carboxylic acids and derivatives Carboxylic acids and derivatives Fatty Acyls Carboxylic acids and derivatives	C10172	NA NA NA NA NA NA NA		1.1939	0.758021	1.05466	1.23114	9.29643e-09	5.55951e-09	2.30836e-13	1.24642e-13	FALSE
144.11	positive	-0.00419279	[13C]C7H14O2	[13C]CHO2_pos	2							1.18828	1.27448	0.507047	0.668872	2.82517e-05	6.78786e-06	2.14006e-11	5.37102e-12	FALSE
144.138	positive	-0.00139732	C8H17NO	CHNO_pos	1	octamide nirvanil valpromide	HMDB0255903 HMDB0259753 HMDB0259756	Fatty Acyls Fatty Acyls Carboximidic acids and derivatives		NA NA NA		1.17698	1.32705	0.837613	0.942225	3.05703e-08	1.57558e-08	1.19452e-12	4.66347e-13	FALSE
144.146	positive	0.0279448	[13C]C8H18O	[13C]CHO_pos	1							1.16589	0.43742	-0.892475	0.503268	0.000465321	8.57064e-05	0.000674864	4.29548e-05	FALSE
144.947	positive											0.566518	0.528443	1.19203	0.865287	0.00031106	5.95134e-05	1.0209e-08	1.34516e-09	FALSE
144.992	positive	0.344481	C8O3	CHO3_pos	9							0.418598	0.791208	1.27618	1.60181	3.50179e-05	8.20814e-06	1.65382e-07	1.74404e-08	FALSE
144.998	positive											0.701397	0.57138	0.771345	1.3002	2.47076e-05	6.01438e-06	0.00101997	6.36837e-05	FALSE
145.005	positive											1.17034	0.67559	1.2531	1.20413	1.85959e-09	1.49717e-09	0.00463229	0.000272125	FALSE
145.009	positive											0.712562	0.844076	1.99683	1.1459	0.00136184	0.000228437	4.7723e-09	6.66476e-10	FALSE
145.017	positive											0.609646	0.380916	1.15296	0.862456	0.000490654	9.00526e-05	0.000838809	5.29038e-05	FALSE
145.035	positive											1.25574	0.928811	1.24076	1.20332	2.38601e-09	1.82197e-09	4.54032e-13	2.10471e-13	FALSE
145.05	positive	-0.034712	C6H8O4	CHO4_pos	3	2-ethylbut-2-enedioic acid dimethylbut-2-enedioic acid lactide 4-ethoxy-4-oxobut-2-enoic acid 2-oxopropyl 2-oxopropanoate H2cbdca dimethyl 2-butenedioate triacetic acid	HMDB0245118 HMDB0245400 HMDB0246077 HMDB0246416 HMDB0247914 HMDB0250639 HMDB0251383 HMDB0259137	Fatty Acyls Fatty Acyls Dioxanes Fatty Acyls Organooxygen compounds Carboxylic acids and derivatives Fatty Acyls Keto acids and derivatives	C01757	NA NA NA NA NA NA NA NA		1.37988	1.05544	1.19365	0.814248	2.97532e-11	6.53673e-11	5.86292e-14	4.37358e-14	FALSE
145.061	positive	0.0805256	C5H8N2O3	CHN2O3_pos	3							0.972775	1.17649	1.70011	1.80009	8.57322e-05	1.85291e-05	5.55603e-11	1.26007e-11	TRUE
145.065	positive	-0.00833001	C10H8O	CHO_pos	7	naphthol β naphthol	HMDB0012138 HMDB0012322	Naphthalenes Naphthalenes	C11714 C11713	NA NA		0.636187	1.49937	0.487274	0.680981	0.003731	0.000574712	4.52188e-12	1.41823e-12	FALSE
145.076	positive	0.0374821	C9H8N2	CHN2_pos	7	1-phenyl-1H-pyrazole 1,4-benzodiazepine 1H-1,5-benzodiazepine 1H-imidazole, 2-phenyl- 3-phenyl-2H-pyrazole 3H-2,3-benzodiazepine 4-aminoquinoline 5-aminoisoquinoline 6-aminoquinoline 8-aminoquinoline 1H-1,2-benzodiazepine 2-(1H-pyrrol-2-ylmethylidene)pyrrole	HMDB0243996 HMDB0244195 HMDB0244870 HMDB0245293 HMDB0245969 HMDB0246262 HMDB0246363 HMDB0246751 HMDB0247035 HMDB0247420 HMDB0249012 HMDB0251475	Azoles Benzodiazepines Benzodiazepines Azoles Azoles Benzodiazepines Quinolines and derivatives Quinolines and derivatives Quinolines and derivatives Quinolines and derivatives Benzodiazepines Pyrroles		NA NA NA NA NA NA NA NA NA NA NA NA		1.10351	0.396745	1.29929	-0.250126	1.82869e-09	1.47918e-09	0.0511975	0.00275342	FALSE
145.084	positive	0.968927	[13C]C9H9N	[13C]CHN_pos	7							1.59218	0.409697	1.31601	0.260568	2.41293e-11	5.61021e-11	0.00568456	0.000331451	FALSE
145.086	positive	-0.00277626	C7H12O3	CHO3_pos	2	4-hydroxycyclohexane-1-carboxylic acid hydroxypropyl methacrylate	HMDB0001988 HMDB0245905	Organooxygen compounds Carboxylic acids and derivatives		NA NA		1.07244	1.43276	0.906687	0.877309	1.05e-10	1.47537e-10	4.43658e-14	3.56163e-14	FALSE
145.097	positive	0.0430287	C6H12N2O2	CHN2O2_pos	2	3-methylbutanoylurea	HMDB0253706	Organic carbonic acids and derivatives		NA		0.831656	0.979195	1.14052	1.84581	1.52366e-07	6.40714e-08	6.53749e-11	1.4435e-11	FALSE
145.101	positive	0.0235957	C11H12	CH_pos	6							0.719136	0.760102	0.571192	0.339112	7.19363e-06	2.01068e-06	7.51083e-07	7.10194e-08	FALSE
145.105	positive	0.00277589	[13C]C6H13NO2	[13C]CHNO2_pos	2							0.809432	0.50335	2.34262	1.69854	0.00948257	0.00136762	1.68735e-08	2.13398e-09	TRUE
145.111	positive											0.925359	0.724455	0.354148	0.832306	0.511495	0.0554357	0.00086182	5.42422e-05	FALSE
145.122	positive	0.0291434	C8H16O2	CHO2_pos	1	caprylic acid valproic acid	HMDB0000482 HMDB0001877	Fatty Acyls Fatty Acyls	C06423 C07185	Biosynthesis of unsaturated fatty acids NA	Biosynthesis of unsaturated fatty acids	0.656798	0.903627	0.178746	0.477758	0.133079	0.0158548	2.01283e-07	2.08812e-08	FALSE
145.134	positive	0.0749343	C7H16N2O	CHN2O_pos	1	N-acetylcadaverine 4-(aminomethyl)-1-methylpiperidin-4-ol milacemide	HMDB0002284 HMDB0246299 HMDB0254717	Carboxylic acids and derivatives Piperidines Carboxylic acids and derivatives		NA NA NA		1.09641	1.0811	0.810914	0.750356	8.1596e-08	3.68204e-08	0.00826234	0.000473218	FALSE
145.142	positive	-0.0346899	[13C]C7H17NO	[13C]CHNO_pos	1							1.05043	0.818672	0.948234	1.32425	0.00865059	0.00125954	2.7862e-09	4.10382e-10	FALSE
145.976	positive											1.00645	1.17413	1.19484	1.3947	0.000133075	2.75881e-05	3.37986e-13	1.67228e-13	FALSE
146.035	positive											0.882712	0.795985	1.0848	1.68759	2.50386e-05	6.08351e-06	2.56539e-10	4.83637e-11	FALSE
146.038	positive											0.606236	0.909184	1.0367	1.36107	0.00462706	0.000703336	1.52348e-05	1.18459e-06	FALSE
146.045	positive	-0.0275791	C5H7NO4	CHNO4_pos	3							0.933904	1.16194	1.45784	1.39096	3.17482e-06	9.50957e-07	1.00591e-10	2.10055e-11	FALSE
146.053	positive	0.00137888	[13C]C5H8O4	[13C]CHO4_pos	3							0.788833	0.570544	1.51403	0.945058	1.24917e-05	3.26781e-06	5.32043e-07	5.16991e-08	FALSE
146.06	positive	-0.00137881	C9H7NO	CHNO_pos	7	indole-3-carboxaldehyde isocarbostyril 4(1H)-quinolinone 4,1-benzoxazepine	HMDB0029737 HMDB0243900 HMDB0246466 HMDB0246595	Indoles and derivatives Isoquinolines and derivatives Quinolines and derivatives Benzoxazepines	C08493 C06324 C06343	NA NA NA NA		0.993049	0.776281	1.39357	0.397335	8.41932e-06	2.29754e-06	1.29335e-05	1.01872e-06	FALSE
146.063	positive											1.45969	0.668154	2.67833	1.16246	1.60208e-06	5.18192e-07	3.16207e-06	2.71946e-07	FALSE
146.068	positive	-0.179235	[13C]C9H8O	[13C]CHO_pos	7							1.72523	0.502131	1.31247	0.52238	3.71926e-06	1.0988e-06	1.25565e-07	1.34462e-08	FALSE
146.073	positive											0.886439	1.70752	1.02014	0.867031	0.00718404	0.00106061	1.16552e-14	1.36507e-14	FALSE
146.081	positive	0.00413582	C6H11NO3	CHNO3_pos	2	isobutyrylglycine butyrylglycine 2-amino-6-oxo-hexanoic acid 4-acetamidobutyrate methyl aminolevulinate morpholin-4-ylacetic acid methyl aminolevulinate but-2-en-2-yl 2-aminoethaneperoxoate amino 6-oxohexanoate	HMDB0000730 HMDB0000808 HMDB0001263 HMDB0003681 HMDB0015127 HMDB0061156 HMDB0254565 HMDB0257836 HMDB0258069	Carboxylic acids and derivatives Carboxylic acids and derivatives Carboxylic acids and derivatives Carboxylic acids and derivatives Carboxylic acids and derivatives Carboxylic acids and derivatives Carboxylic acids and derivatives Carboxylic acids and derivatives Organooxygen compounds	C04076 C02946	NA NA Lysine degradation NA NA NA NA NA NA	Lysine degradation	1.0937	1.271	1.1916	1.24507	1.71538e-09	1.39844e-09	8.24066e-15	1.0858e-14	FALSE
146.089	positive	-0.0358418	[13C]C6H12O3	[13C]CHO3_pos	2							0.929087	1.09121	0.891346	1.28312	1.02861e-06	3.49719e-07	5.21609e-07	5.08279e-08	FALSE
146.092	positive	-0.157149	C5H11N3O2	CHN3O2_pos	2	4-[(diaminomethylidene)amino]butanoic acid 1-butyl-1-nitrosourea 2-[(diaminomethylidene)amino]butanoic acid 2-amino-N-[(methylcarbamoyl)methyl]acetamide 2-aminopentanediamide	HMDB0003464 HMDB0243841 HMDB0245137 HMDB0252249 HMDB0252803	Carboxylic acids and derivatives Organic carbonic acids and derivatives Carboxylic acids and derivatives Carboxylic acids and derivatives Carboxylic acids and derivatives	C01035 C00290	NA NA NA NA NA		0.630173	0.927205	1.50259	1.48893	0.0980264	0.0119169	4.86841e-05	3.55513e-06	FALSE
146.096	positive	-0.038597	C10H11N	CHN_pos	6	1-methyl-3,4-dihydroisoquinoline 1H-indole, 1,3-dimethyl- benzyl(prop-2-yn-1-yl)amine	HMDB0243928 HMDB0244168 HMDB0244443	Dihydroisoquinolines Indoles and derivatives Benzene and substituted derivatives		NA NA NA		0.514933	0.794893	0.0420708	-0.123736	0.905235	0.0937022	0.196436	0.0100664	FALSE
146.105	positive	0.0592706	[13C]C10H12	[13C]CH_pos	6							0.140735	0.463441	0.209792	0.0281135	0.397147	0.0437933	0.733423	0.0357555	FALSE
146.118	positive	-0.0330783	C7H15NO2	CHNO2_pos	1	butyrobetaine [(3-methylbutyl)amino]acetic acid 3-(morpholin-4-yl)propan-1-ol 7-aminoheptanoic acid methyl 2-amino-4-methylpentanoate	HMDB0001161 HMDB0245644 HMDB0246679 HMDB0247233 HMDB0254597	Fatty Acyls Carboxylic acids and derivatives Oxazinanes Fatty Acyls Carboxylic acids and derivatives	C01181	NA NA NA NA NA		1.27112	0.883542	0.81844	1.36981	0.000120298	2.51403e-05	1.35648e-09	2.13135e-10	FALSE
146.126	positive	-0.00413456	[13C]C7H16O2	[13C]CHO2_pos	1							0.882207	0.392951	-0.105141	0.342395	0.434471	0.0476254	0.00278092	0.000166636	FALSE
146.154	positive	0.136414	C8H19NO	CHNO_pos	0	cardiomax	HMDB0253104	Organooxygen compounds		NA		0.89441	0.989751	1.86454	1.99157	2.4445e-07	9.77212e-08	4.03241e-10	7.17258e-11	TRUE
146.944	positive											0.842241	0.550046	1.55349	1.04932	0.00122935	0.000208167	3.64165e-10	6.5691e-11	FALSE
146.96	positive											1.27845	1.38623	1.46178	0.947763	1.85342e-05	4.64464e-06	2.74727e-12	9.34155e-13	FALSE
146.967	positive											0.960699	1.50305	1.95375	1.31194	9.389e-06	2.53546e-06	4.13414e-05	3.04e-06	FALSE
146.974	positive											0.505224	0.552112	1.18551	1.03066	0.0128347	0.00180245	0.00296715	0.00017727	FALSE
146.994	positive											0.988727	0.800616	1.77616	1.67599	0.00220244	0.00035387	1.74474e-10	3.41955e-11	TRUE
146.996	positive											0.210095	1.16785	0.403176	1.76336	0.276336	0.0313243	1.04837e-06	9.68634e-08	FALSE
147.021	positive											0.66412	0.522416	0.866382	0.388529	0.0792286	0.00974594	0.0990954	0.00521712	FALSE
147.023	positive											1.32563	0.730899	1.12599	1.22486	9.61775e-10	8.718e-10	0.00620464	0.000360303	FALSE
147.029	positive	-0.0657437	C5H6O5	CHO5_pos	3	oxoglutarate acetonedicarboxylic acid 1,2,3-trioxocane-4,8-dione	HMDB0000208 HMDB0013701 HMDB0248224	Keto acids and derivatives Keto acids and derivatives Carboxylic acids and derivatives	C00026	Alanine, aspartate and glutamate metabolism | Arginine and proline metabolism | Aspartate Metabolism | beta-Alanine metabolism | Citric Acid Cycle | Cysteine Metabolism | Glutamate Metabolism | Glycine, serine and threonine metabolism | Glycolysis / Gluconeogenesis | Lysine degradation | Nitrogen metabolism | Phenylalanine and Tyrosine Metabolism | Propanoate metabolism | Tryptophan metabolism | …	Alanine, aspartate and glutamate metabolism | Arginine and proline metabolism | Aspartate Metabolism | beta-Alanine metabolism | Citric Acid Cycle | Cysteine Metabolism | Glutamate Metabolism | Glycine, serine and threonine metabolism | Glycolysis / Gluconeogenesis | Lysine degradation | Nitrogen metabolism | Phenylalanine and Tyrosine Metabolism | Propanoate metabolism | Tryptophan metabolism | …	0.758873	0.759723	1.4865	1.07549	0.0087077	0.00126715	2.10314e-05	1.61255e-06	FALSE
147.032	positive											1.13143	0.812122	1.29811	1.96626	1.22931e-09	1.07848e-09	8.18638e-10	1.35015e-10	FALSE
147.039	positive											0.689346	0.63579	1.8792	0.674685	0.00239047	0.000381129	0.00452906	0.00026619	FALSE
147.04	positive	0.0479345	C4H6N2O4	CHN2O4_pos	3	5-amino-1,3,2-dioxazepane-4,7-dione	HMDB0248341	Carboxylic acids and derivatives		NA		0.966381	0.7479	1.62996	0.811636	0.00277001	0.000436276	0.0161182	0.000899776	FALSE
147.044	positive	0.0287599	C9H6O2	CHO2_pos	7	3H-indene-1,2-dione isocoumarin	HMDB0244733 HMDB0253625	Indanes Isocoumarins and derivatives		NA NA		1.43659	0.962078	1.04817	0.453641	1.20734e-09	1.061e-09	1.33998e-07	1.42798e-08	FALSE
147.055	positive	0.142419	C8H6N2O	CHN2O_pos	7	1H-1,8-naphthyridin-2-one quinoxaline-2-one 4-quinazolinol	HMDB0244250 HMDB0245168 HMDB0246465	Diazanaphthalenes Diazanaphthalenes Diazanaphthalenes		NA NA NA		1.08685	1.17918	1.39656	-0.381749	5.08622e-06	1.46671e-06	0.0175158	0.0009751	FALSE
147.065	positive	-0.102699	C6H10O4	CHO4_pos	2	α-methylglutaric acid adipic acid methylglutaric acid solerole 2-ethylbutanedioic acid DL-2,3-dimethylsuccinic acid 5,6-dihydroxy-2-oxohexanal 1,1-ethanediol, diacetate 2-oxopropyl 2-hydroxypropanoate conduritol 1,2:5,6-dianhydrogalactitol 2-(hydroxymethyl)-3,4-dihydro-2H-pyran-3,4-diol isosorbide 3-(hydroxymethyl)-5-oxopentanoic acid	HMDB0000422 HMDB0000448 HMDB0000752 HMDB0002173 HMDB0245124 HMDB0245405 HMDB0246029 HMDB0246940 HMDB0247912 HMDB0250433 HMDB0251140 HMDB0252763 HMDB0253693 HMDB0255410	Fatty Acyls Fatty Acyls Fatty Acyls Lactones Fatty Acyls Fatty Acyls Fatty Acyls Carboxylic acids and derivatives Organooxygen compounds Organooxygen compounds Organooxygen compounds Organooxygen compounds Furofurans Fatty Acyls	C06104	NA NA NA NA NA NA NA NA NA NA NA NA NA NA		1.16773	0.987391	1.11016	0.884792	6.00376e-09	3.8336e-09	1.12301e-14	1.36132e-14	FALSE
147.078	positive											1.225	1.91236	-1.75231	-1.2957	0.0176614	0.00241362	0.00014379	9.91204e-06	FALSE
147.08	positive	-0.00821506	C10H10O	CHO_pos	6	tetralone	HMDB0248243	Tetralins		NA		0.513066	0.656349	0.401695	0.105553	0.00239786	0.000382072	0.0818649	0.00433445	FALSE
147.084	positive											1.18194	0.75531	-0.996697	-0.881098	0.0823302	0.0101083	0.00019656	1.33373e-05	FALSE
147.092	positive	0.105419	C9H10N2	CHN2_pos	6							1.07056	0.338021	1.35899	0.391552	0.000202969	4.02744e-05	0.000165856	1.13428e-05	FALSE
147.102	positive	-0.00273796	C7H14O3	CHO3_pos	1	2-(oxolan-2-ylmethoxy)ethanol	HMDB0252869	Tetrahydrofurans		NA		1.27558	0.993165	0.391267	0.676072	0.0104147	0.00149045	1.37726e-07	1.46514e-08	FALSE
147.113	positive	0.179322	C6H14N2O2	CHN2O2_pos	1	L-lysine 2,5-diamino-2-methylpentanoic acid 2-hydrazinyl-4-methylpentanoic acid 3-(2,2,2-trimethylhydrazin-2-ium-1-yl)propanoate amino 2-amino-4-methylpentanoate	HMDB0000182 HMDB0248233 HMDB0248307 HMDB0254733 HMDB0257947	Carboxylic acids and derivatives Carboxylic acids and derivatives Carboxylic acids and derivatives Carboxylic acids and derivatives Carboxylic acids and derivatives	C00047	Biotin Metabolism | Lysine degradation NA NA NA NA	Biotin Metabolism | Lysine degradation	0.712768	1.14421	1.43474	1.40713	0.000658416	0.000117799	3.06255e-10	5.64631e-11	FALSE
147.117	positive	0.0232702	C11H14	CH_pos	5	pentacyclo[5.4.0.0^{2,6}.0^{3,10}.0^{5,9}]undecane	HMDB0246677	Prenol lipids		NA		1.41909	1.35601	0.775578	0.457663	1.86634e-06	5.9185e-07	1.68464e-08	2.13166e-09	FALSE
147.138	positive	-0.0396905	C8H18O2	CHO2_pos	0	1,6-dimethoxyhexane ethanol, 2-(hexyloxy)- octane-4,5-diol octane-1,1-diol 2-butoxybutan-1-ol	HMDB0244242 HMDB0244945 HMDB0246612 HMDB0255905 HMDB0256692	Organooxygen compounds Organooxygen compounds Organooxygen compounds Fatty Acyls Organooxygen compounds		NA NA NA NA NA		1.98311	0.292697	-0.646701	0.260534	0.00444279	0.000677511	0.0298944	0.00163493	FALSE
147.982	positive											1.39369	0.76472	1.13414	1.25798	5.27838e-05	1.19146e-05	2.31498e-11	5.77415e-12	FALSE
148.009	positive											0.441262	1.08807	1.59911	1.30564	0.00912954	0.00132149	0.000352964	2.32599e-05	FALSE
148.024	positive											0.697834	1.20031	1.21029	0.798832	0.0167797	0.00229978	0.0209877	0.00116012	FALSE
148.039	positive	-0.0326459	C8H5NO2	CHNO2_pos	7	phthalimide	HMDB0256502	Isoindoles and derivatives		NA		2.15141	0.791072	1.3437	0.964241	2.95567e-11	6.52119e-11	1.52359e-11	3.99763e-12	FALSE
148.047	positive	0.131937	[13C]C8H6O2	[13C]CHO2_pos	7							1.37275	0.815533	1.46342	0.0373211	0.000167943	3.40275e-05	0.791187	0.0384248	FALSE
148.055	positive											0.797277	0.627402	1.4665	1.61455	8.4513e-06	2.30505e-06	0.0132949	0.000747159	FALSE
148.06	positive	-0.027201	C5H9NO4	CHNO4_pos	2	L-glutamic acid O-acetyl-L-serine D-glutamic acid glutaminsaeure 2-amino-5-hydroxy-4-oxopentanoic acid 2-aminopropanoyl ethaneperoxoate L-aspartic acid, N-methyl-	HMDB0000148 HMDB0003011 HMDB0003339 HMDB0060475 HMDB0246802 HMDB0248101 HMDB0255174	Carboxylic acids and derivatives Carboxylic acids and derivatives Carboxylic acids and derivatives Carboxylic acids and derivatives Carboxylic acids and derivatives Carboxylic acids and derivatives Carboxylic acids and derivatives	C00025 C00979 C00217 C00302	Alanine, aspartate and glutamate metabolism | Amino Sugar Metabolism | Arachidonic Acid Metabolism | Arginine and proline metabolism | Aspartate Metabolism | beta-Alanine metabolism | Cysteine Metabolism | Glutamate Metabolism | Glutathione metabolism | Glycine, serine and threonine metabolism | Histidine metabolism | Lysine degradation | Nicotinate and nicotinamide metabolism | Nitrogen metaboli…	Alanine, aspartate and glutamate metabolism | Amino Sugar Metabolism | Arachidonic Acid Metabolism | Arginine and proline metabolism | Aspartate Metabolism | beta-Alanine metabolism | Cysteine Metabolism | Glutamate Metabolism | Glutathione metabolism | Glycine, serine and threonine metabolism | Histidine metabolism | Lysine degradation | Nicotinate and nicotinamide metabolism | Nitrogen metaboli…	1.15682	1.16012	1.47695	1.35219	8.05099e-11	1.23868e-10	3.1863e-15	6.03508e-15	FALSE
148.069	positive	0.137358	[13C]C5H10O4	[13C]CHO4_pos	2							0.433887	1.04799	0.878992	1.24414	0.00296812	0.000464935	5.36791e-07	5.21396e-08	FALSE
148.076	positive	-0.00135991	C9H9NO	CHNO_pos	6	5-methoxyindole 3-phenylprop-2-enamide 2-methoxy-1H-indole phenylethyl isocyanate	HMDB0246822 HMDB0250263 HMDB0254550 HMDB0256402	Indoles and derivatives Cinnamic acids and derivatives Indoles and derivatives Benzene and substituted derivatives		NA NA NA NA		0.829858	0.647771	0.905046	0.574809	3.0751e-06	9.25367e-07	4.78271e-06	4.00666e-07	FALSE
148.084	positive	-0.0407951	[13C]C9H10O	[13C]CHO_pos	6							0.373196	1.01739	0.0334416	0.0256091	0.811912	0.0848895	0.680109	0.0332366	FALSE
148.088	positive											0.264524	0.788268	-1.16475	-1.50114	0.208551	0.0240452	0.00237613	0.000143373	FALSE
148.097	positive	0.00407915	C6H13NO3	CHNO3_pos	1	2-(morpholin-4-yloxy)ethanol 5-(hydroxymethyl)piperidine-3,4-diol 3-amino-4,5-dihydroxyhexanal 2-(hydroxymethyl)-1-methylpyrrolidine-3,4-diol	HMDB0061157 HMDB0246730 HMDB0250880 HMDB0254400	Oxazinanes Piperidines Organonitrogen compounds Pyrrolidines		NA NA NA NA		1.0782	1.5167	0.856047	1.49951	7.43879e-08	3.41623e-08	1.83437e-13	1.05137e-13	FALSE
148.112	positive	-0.0380681	C10H13N	CHN_pos	5	1-methyl-1,2,3,4-tetrahydroisoquinoline 1,2,3,4-tetrahydronaphthalen-1-amine 2-aminotetralin	HMDB0243920 HMDB0244116 HMDB0244119	Tetrahydroisoquinolines Tetralins Tetralins		NA NA NA		0.916468	0.684929	1.06161	0.491559	6.76105e-09	4.23885e-09	3.01809e-06	2.60395e-07	FALSE
148.12	positive	-0.145467	[13C]C10H14	[13C]CH_pos	5							0.809999	0.675806	0.729323	0.230168	0.0046741	0.000709862	0.0231343	0.001275	FALSE
148.133	positive	-0.168563	C7H17NO2	CHNO2_pos	0							1.01865	0.732578	1.30739	1.48823	9.1546e-07	3.1455e-07	7.92086e-07	7.46344e-08	FALSE
148.657	positive											2.08305	1.32018	1.28727	1.37502	7.77816e-13	9.16566e-12	3.57841e-11	8.52216e-12	FALSE
148.943	positive											1.24002	0.712952	1.56822	0.965873	6.17278e-06	1.74796e-06	1.21349e-08	1.56657e-09	FALSE
148.976	positive											0.688793	1.29872	1.17493	1.58988	2.78953e-08	1.46837e-08	2.47986e-13	1.31271e-13	FALSE
148.99	positive											1.8836	0.981861	1.29679	1.06158	1.51867e-10	1.97842e-10	1.14218e-13	7.40407e-14	FALSE
148.993	positive											0.463283	0.683454	2.03618	0.861038	4.72981e-06	1.37464e-06	2.81754e-05	2.12337e-06	FALSE
149.003	positive											0.802214	1.13924	1.11793	1.46373	3.42738e-05	8.04463e-06	4.41882e-06	3.71981e-07	FALSE
149.012	positive											0.89281	0.958813	1.56881	1.3586	4.70811e-09	3.18266e-09	5.98601e-11	1.34127e-11	FALSE
149.014	positive											1.68581	0.94122	1.34216	2.27177	2.59105e-08	1.37506e-08	9.99737e-07	9.2723e-08	FALSE
149.019	positive											0.387546	0.906471	-0.773982	1.04922	0.288926	0.0326017	0.00044312	2.88715e-05	FALSE
149.021	positive											0.947819	1.39054	1.67674	0.679529	4.98735e-06	1.44302e-06	0.00499428	0.00029261	FALSE
149.035	positive	0.37966	C7H4N2O2	CHN2O2_pos	7							1.46065	1.13514	1.5444	1.53755	0.00182718	0.000298103	3.67607e-07	3.6646e-08	TRUE
149.039	positive											0.526648	0.679699	0.898514	0.513813	2.17056e-05	5.3591e-06	0.020663	0.00114348	FALSE
149.043	positive	0.408011	[13C]C7H5NO2	[13C]CHNO2_pos	7							1.57222	0.719453	1.4623	1.09995	0.00184421	0.00030041	1.05575e-06	9.74706e-08	FALSE
149.045	positive											1.47343	1.48179	0.781206	0.825902	7.569e-06	2.09863e-06	3.65133e-11	8.64487e-12	FALSE
149.057	positive											1.2682	0.396874	-1.39561	0.4886	0.0204171	0.00275966	0.060627	0.00324112	FALSE
149.06	positive	0.0283683	C9H8O2	CHO2_pos	6	cis-cinnamic acid cinnamic acid 3,4-dihydro-2-benzopyran-1-one oxonine-2-carbaldehyde	HMDB0000567 HMDB0000930 HMDB0253619 HMDB0255997	Cinnamic acids and derivatives Cinnamic acids and derivatives Benzopyrans NA	C10438 C10438	NA NA NA NA		1.49518	1.02551	0.880833	0.440421	8.77063e-09	5.30009e-09	2.12448e-08	2.63459e-09	FALSE
149.071	positive	0.275557	C8H8N2O	CHN2O_pos	6							0.720815	0.820381	1.33785	1.08742	0.0227763	0.00305385	0.000464219	3.0157e-05	FALSE
149.081	positive	-0.033767	C6H12O4	CHO4_pos	1	mevalonic acid colitose 3,6-dideoxy-D-xylo-hexose digitoxose 6-methyloxane-2,4,5-triol	HMDB0000227 HMDB0248646 HMDB0249152 HMDB0249986 HMDB0251279	Fatty Acyls Organooxygen compounds Organooxygen compounds Oxanes Organooxygen compounds	C00418	Steroid Biosynthesis NA NA NA NA	Steroid Biosynthesis	1.20493	1.08402	1.07106	1.19596	2.53377e-08	1.3488e-08	8.49613e-12	2.42903e-12	FALSE
149.094	positive											0.630935	0.65474	0.313105	1.11743	0.666856	0.0708374	0.00882453	0.00050387	FALSE
149.096	positive	-0.00810325	C10H12O	CHO_pos	5	4-phenylbut-3-en-2-ol p-propenylanisole butyrophenone	HMDB0245827 HMDB0248443 HMDB0249483	Cinnamyl alcohols Phenol ethers Organooxygen compounds		NA NA NA		0.0445271	0.487398	0.0858887	-0.0998181	0.568393	0.0610789	0.291692	0.0147268	FALSE
149.1	positive	0.10669	[13C]C5H13NO3	[13C]CHNO3_pos	1							0.796734	1.1859	1.48695	2.60045	0.011975	0.00169456	3.77415e-07	3.75775e-08	FALSE
149.107	positive	-0.166104	C9H12N2	CHN2_pos	5	(+-)-nornicotine (2-phenylprop-2-en-1-yl)hydrazine	HMDB0001126 HMDB0242479	Pyridines and derivatives Benzene and substituted derivatives	C06524	NA NA		0.786298	0.539603	1.3385	0.175879	0.000244002	4.76326e-05	0.481414	0.0238681	FALSE
149.117	positive	-0.0027007	C7H16O3	CHO3_pos	0	triethyl orthoformate	HMDB0259190	Organooxygen compounds		NA		0.698872	1.0443	0.343528	0.979343	0.128288	0.0153262	4.65758e-17	6.27328e-16	FALSE
149.132	positive	0.0229536	C11H16	CH_pos	4							1.53465	1.62326	0.71465	0.551145	1.32267e-07	5.663e-08	4.82361e-10	8.43755e-11	FALSE
149.961	positive											1.14533	1.61531	1.26882	1.44708	1.02227e-06	3.48022e-07	9.70339e-16	3.0552e-15	FALSE
149.977	positive											0.418752	1.08594	0.302264	1.8474	0.423019	0.0464487	2.20458e-07	2.27149e-08	FALSE
149.998	positive											1.59594	1.16364	1.51318	1.51725	3.79053e-07	1.44511e-07	3.64125e-14	3.07593e-14	TRUE
150.037	positive											0.193587	0.5122	0.286051	0.400406	0.120854	0.0144949	5.08444e-06	4.2433e-07	FALSE
150.044	positive											1.18195	0.582894	0.497616	0.768566	0.0574416	0.00721309	0.000788943	4.98625e-05	FALSE
150.048	positive											1.15817	0.639287	0.475483	0.758849	0.128947	0.0154014	0.0170091	0.000947547	FALSE
150.055	positive	0.0348882	C8H7NO2	CHNO2_pos	6	N-acetyl-p-benzoquinone 2-(2-aminophenyl)-2-oxoacetaldehyde 5-hydroxy-1,3-dihydroindol-2-one 2,3-dihydro-1H-indole-5,6-dione 2,4-dihydro-1,2-benzoxazin-3-one 1H-indole-5-peroxol	HMDB0060946 HMDB0244917 HMDB0246809 HMDB0248311 HMDB0249036 HMDB0260025	Organonitrogen compounds Benzene and substituted derivatives Indoles and derivatives Indoles and derivatives Benzoxazines Indoles and derivatives		NA NA NA NA NA NA		0.721684	1.32602	1.16381	1.16526	0.000124752	2.60293e-05	1.14465e-10	2.35579e-11	FALSE
150.063	positive	0.197242	[13C]C8H8O2	[13C]CHO2_pos	6							0.375624	0.600497	0.474588	0.222777	0.130214	0.0155384	0.0206355	0.00114221	FALSE
150.076	positive	0.107333	C5H11NO4	CHNO4_pos	1	4-amino-2,3,5-trihydroxypentanal	HMDB0246348	Organooxygen compounds		NA		1.04779	1.16549	1.61123	1.99482	7.66205e-10	7.14512e-10	1.27138e-11	3.41724e-12	TRUE
150.08	positive											0.461855	0.322984	0.842371	0.480144	0.227375	0.0260822	0.0218006	0.00120341	FALSE
150.091	positive	-0.00134152	C9H11NO	CHNO_pos	5	2-aminopropiophenone para-dimethylaminobenzaldehyde 1-(4-aminophenyl)propan-1-one propionanilide	HMDB0245024 HMDB0246303 HMDB0246624 HMDB0255232	Organooxygen compounds Benzene and substituted derivatives Organooxygen compounds Benzene and substituted derivatives		NA NA NA NA		1.08272	0.851918	0.784534	0.322608	1.4414e-06	4.71216e-07	5.67536e-06	4.70408e-07	FALSE
150.099	positive	0.026829	[13C]C9H12O	[13C]CHO_pos	5							0.0714758	0.343988	-0.128334	-0.248188	0.394255	0.0435022	0.0198353	0.00109968	FALSE
150.104	positive											0.384178	0.88125	0.412425	0.718873	0.116265	0.0139736	0.000395806	2.59491e-05	FALSE
150.112	positive	-0.0630427	C6H15NO3	CHNO3_pos	0							1.26098	0.963107	1.47752	1.57315	4.64194e-11	8.44489e-11	2.55605e-12	8.82753e-13	FALSE
150.121	positive	0.0992534	[13C]C6H16O3	[13C]CHO3_pos	0							0.851021	0.915982	-0.243935	1.4493	0.581282	0.0623218	1.14265e-12	4.48261e-13	FALSE
150.128	positive	0.0295063	C10H15N	CHN_pos	4	phentermine meth 4-methylamphetamine 4-phenylbutylamine 5-butyl-2-methylpyridine (+)-N,α-dimethylphenethylamine N,N-diethylaniline	HMDB0014337 HMDB0015517 HMDB0246503 HMDB0246572 HMDB0246758 HMDB0251523 HMDB0255255	Benzene and substituted derivatives Benzene and substituted derivatives Benzene and substituted derivatives Benzene and substituted derivatives Pyridines and derivatives Benzene and substituted derivatives Organonitrogen compounds	C07438 C07164	NA NA NA NA NA NA NA		1.04598	0.936065	0.730716	0.408619	3.23817e-06	9.68814e-07	4.12931e-07	4.08953e-08	FALSE
150.136	positive	-0.00938787	[13C]C10H16	[13C]CH_pos	4							0.762178	0.872229	0.544323	0.51089	0.0014349	0.000239145	5.71946e-07	5.53326e-08	FALSE
150.149	positive	-0.0992346	C7H19NO2	CHNO2_pos	-1							1.09448	0.524919	1.68386	0.476709	0.182702	0.0212444	0.405909	0.020253	FALSE
150.913	positive											0.898417	0.93859	1.65376	1.68494	2.14027e-06	6.69305e-07	1.04465e-07	1.13268e-08	TRUE
150.931	positive											1.66704	1.45036	1.75645	1.21026	7.14724e-06	1.9988e-06	8.15701e-13	3.41554e-13	FALSE
150.94	positive											0.770996	1.2316	1.66099	1.31916	7.50527e-06	2.08431e-06	1.51534e-13	9.20754e-14	FALSE
150.969	positive											1.17759	0.717926	2.33152	2.19323	0.00445842	0.000679694	3.41053e-09	4.92469e-10	TRUE
150.982	positive											0.995377	0.547653	1.28882	0.895739	3.82583e-05	8.91127e-06	1.60724e-06	1.4464e-07	FALSE
150.991	positive											0.801453	1.12177	1.3461	1.00817	2.84967e-05	6.84038e-06	3.47972e-10	6.30986e-11	FALSE
151.018	positive	1.99186	C11H2O	CHO_pos	11							0.631091	0.950066	1.05022	2.05533	1.01611e-08	5.98683e-09	0.00503827	0.000295116	FALSE
151.024	positive											1.39538	0.647374	0.463564	0.79178	0.134092	0.0159644	0.000153109	1.05335e-05	FALSE
151.028	positive											0.968899	0.718804	1.65156	0.818635	1.13087e-06	3.79756e-07	1.95009e-06	1.73244e-07	FALSE
151.035	positive											0.539652	0.79139	0.885853	0.294217	0.0974746	0.0118582	0.209846	0.0107309	FALSE
151.037	positive											0.6024	0.598721	0.921998	0.864351	0.000358547	6.76995e-05	0.0263445	0.00144535	FALSE
151.039	positive	-0.0026661	C8H6O3	CHO3_pos	6	5-hydroxy-3H-1-benzofuran-2-one 4-formylbenzoic acid	HMDB0245720 HMDB0246430	Benzofurans Benzene and substituted derivatives		NA NA		1.01629	0.193989	1.00722	0.0387008	3.27685e-09	2.36302e-09	0.624144	0.0306313	FALSE
151.04	positive											0.585768	0.86574	-0.506983	0.0330951	0.370528	0.0410414	0.895522	0.0431376	FALSE
151.042	positive											1.09309	0.605472	0.422634	0.986552	0.0987327	0.0119971	0.000745196	4.72454e-05	FALSE
151.05	positive	0.107969	C7H6N2O2	CHN2O2_pos	6	5-(prop-1-yn-1-yl)-1,3-dihydropyrimidine-2,4-dione	HMDB0246840	Diazines		NA		0.855379	1.18547	1.75095	1.64988	0.000823692	0.000144233	5.47069e-07	5.30741e-08	TRUE
151.055	positive											0.733778	1.16624	0.949001	1.45967	3.15493e-07	1.22992e-07	3.01077e-07	3.04521e-08	FALSE
151.058	positive	0.269242	[13C]C7H7NO2	[13C]CHNO2_pos	6							0.35636	0.795341	1.00293	1.52396	0.333797	0.0372594	0.000456101	2.96614e-05	FALSE
151.063	positive											1.2933	0.578517	2.53806	1.51706	0.00264492	0.000417844	8.86989e-06	7.13717e-07	TRUE
151.073	positive											0.862461	1.33762	0.0887645	-0.476398	0.592828	0.0634285	0.158458	0.00819996	FALSE
151.075	positive	-0.0386491	C9H10O2	CHO2_pos	5	3-phenylpropionic acid 4-ethylbenzoic acid 2-phenylpropionic acid benzoic acid, 3,5-dimethyl- 4-hydroxy-3-methyl-2-(prop-2-yn-1-yl)cyclopent-2-en-1-one 3,4-dihydro-2H-1-benzopyran-2-ol bicyclo[2.2.1]hept-5-ene-2,3-dicarbaldehyde	HMDB0000764 HMDB0002097 HMDB0011743 HMDB0246063 HMDB0246651 HMDB0250203 HMDB0258089	Phenylpropanoic acids Benzene and substituted derivatives Phenylpropanoic acids Benzene and substituted derivatives Organooxygen compounds Benzopyrans Organic oxides	C05629	NA NA NA NA NA NA NA		0.988734	0.834216	0.606754	0.350816	1.43732e-05	3.69295e-06	1.18266e-06	1.08732e-07	FALSE
151.087	positive	0.00533051	C8H10N2O	CHN2O_pos	5	N-phenylethanehydrazonic acid N-benzyl-N-methylnitrosoamine N-phenylacetohydrazide NDMA N'-benzyl-N-hydroxymethanimidamide	HMDB0243811 HMDB0254625 HMDB0255224 HMDB0255256 HMDB0260370	Benzene and substituted derivatives Benzene and substituted derivatives Benzene and substituted derivatives Organonitrogen compounds Benzene and substituted derivatives	C19680	NA NA NA NA NA		0.621458	0.733877	1.04625	0.215039	0.00649388	0.000965588	0.0586749	0.00313954	FALSE
151.095	positive	1.09936	[13C]C8H11NO	[13C]CHNO_pos	5							0.453316	0.648804	0.118385	0.0322632	0.792219	0.083065	0.819603	0.0397253	FALSE
151.096	positive	-0.0333135	C6H14O4	CHO4_pos	0	triethylene glycol	HMDB0259193	Organooxygen compounds		NA		1.14788	1.19243	1.21948	0.872307	4.90397e-12	2.11888e-11	1.20518e-13	7.66893e-14	FALSE
151.11	positive											0.907767	1.07202	1.97943	1.17333	0.00294529	0.000461778	5.3082e-06	4.41637e-07	FALSE
151.112	positive	-0.00799443	C10H14O	CHO_pos	4	2-sec-butylphenol 4-n-butylphenol verbenone	HMDB0245315 HMDB0246380 HMDB0259787	Benzene and substituted derivatives Phenols Prenol lipids	C14138 C14464 C09913	NA NA NA		0.253498	0.789641	0.253724	0.37758	0.0242367	0.00323878	2.78878e-05	2.10497e-06	FALSE
151.123	positive	-0.230489	C9H14N2	CHN2_pos	4							0.335625	0.971348	0.360041	-0.00162758	0.155257	0.0182869	0.991746	0.047546	FALSE
151.131	positive	-0.0692762	[13C]C9H15N	[13C]CHN_pos	4							0.82827	0.871198	-0.0374073	0.444587	0.937016	0.0967216	0.112494	0.00590074	FALSE
151.148	positive	0.0226454	C11H18	CH_pos	3							0.66901	1.11472	0.516538	0.390481	6.54532e-05	1.44228e-05	2.53503e-07	2.59323e-08	FALSE
151.961	positive											0.94515	0.866601	1.90761	1.44199	0.00200152	0.000324098	2.19616e-08	2.71654e-09	FALSE
152.013	positive											0.711849	0.922382	1.58522	1.64661	5.57094e-09	3.62418e-09	5.98427e-05	4.31925e-06	TRUE
152.016	positive											0.978377	1.10596	1.09532	1.09097	2.9454e-06	8.88916e-07	2.862e-11	6.98759e-12	FALSE
152.032	positive											0.882065	1.08654	1.57403	2.13404	1.38999e-06	4.55559e-07	5.31744e-08	6.13305e-09	TRUE
152.034	positive	0.1364	C7H5NO3	CHNO3_pos	6	3-nitrobenzaldehyde 4-nitrobenzaldehyde	HMDB0245945 HMDB0246531	Benzene and substituted derivatives Benzene and substituted derivatives		NA NA		1.03915	0.907376	1.37188	1.44425	0.00143336	0.000238964	4.64935e-08	5.4114e-09	FALSE
152.042	positive	0.0317807	[13C]C7H6O3	[13C]CHO3_pos	6							0.808587	0.908248	1.71035	-0.690273	0.00279513	0.000439831	0.00118204	7.3387e-05	FALSE
152.05	positive											1.34526	1.25833	1.75895	2.13693	1.37864e-09	1.17955e-09	1.29703e-05	1.02062e-06	TRUE
152.071	positive	-0.0317748	C8H9NO2	CHNO2_pos	5	acetaminophen (+/-)-α-phenylglycine 4-(2-aminoethyl)cyclohexa-3,5-diene-1,2-dione 2-amino-3-methylbenzoic acid N-(2-hydroxyphenyl)ethanimidic acid N-(3-hydroxyphenyl)ethanimidic acid 3-methoxybenzamide tetrahydrophthalimide pamba benzeneacetic acid, 4-amino- 4-methyl-1,4-dihydropyridine-3,5-dicarbaldehyde N-phenylglycine	HMDB0001859 HMDB0002210 HMDB0012219 HMDB0060680 HMDB0061919 HMDB0245121 HMDB0245795 HMDB0245919 HMDB0246044 HMDB0246300 HMDB0246358 HMDB0254370 HMDB0255227	Phenols Carboxylic acids and derivatives Organooxygen compounds Benzene and substituted derivatives Benzene and substituted derivatives Benzene and substituted derivatives Benzene and substituted derivatives Benzene and substituted derivatives Isoindoles and derivatives Benzene and substituted derivatives Benzene and substituted derivatives Pyridines and derivatives Carboxylic acids and derivativ…	C06804 C17755 C16571	NA NA NA NA NA NA NA NA NA NA NA NA NA		1.3299	1.12815	1.13382	0.668085	1.36478e-11	3.86679e-11	1.13757e-09	1.82163e-10	FALSE
152.079	positive	-0.00397163	[13C]C8H10O2	[13C]CHO2_pos	5							0.386245	0.744573	0.51121	0.187812	0.0363607	0.00472497	0.066032	0.00351921	FALSE
152.092	positive	0.0397129	C5H13NO4	CHNO4_pos	0							1.08961	1.18192	1.41954	2.14256	1.21946e-06	4.06347e-07	1.04028e-10	2.16859e-11	FALSE
152.1	positive	0.0675083	[13C]C5H14O4	[13C]CHO4_pos	0							1.07913	1.06882	1.76847	1.19573	2.44458e-06	7.52218e-07	9.21757e-05	6.48686e-06	FALSE
152.107	positive	-0.00132363	C9H13NO	CHNO_pos	4	phenylpropanolamine N-methyltyramine p-hydroxyamphetamine dl-norephedrine DL-phenylpropanolamine N,N-dimethyl P-anisidine 2-amino-3-phenyl-1-propanol	HMDB0001942 HMDB0003633 HMDB0060765 HMDB0243518 HMDB0245036 HMDB0246493 HMDB0253909 HMDB0256426	Benzene and substituted derivatives Benzene and substituted derivatives Benzene and substituted derivatives Benzene and substituted derivatives Benzene and substituted derivatives Phenol ethers Benzene and substituted derivatives Benzene and substituted derivatives	C02343 C02442	NA NA NA NA NA NA NA NA		1.11923	0.948974	0.865556	0.38098	1.45837e-07	6.16259e-08	2.64361e-06	2.29721e-07	FALSE
152.115	positive	0.0264712	[13C]C9H14O	[13C]CHO_pos	4							0.249673	0.854704	0.238525	0.400008	0.0320225	0.0042023	8.18712e-06	6.63401e-07	FALSE
152.12	positive											0.507315	0.90158	0.410319	-0.151093	0.253053	0.02883	0.413226	0.0206054	FALSE
152.128	positive	0.00397033	C6H17NO3	CHNO3_pos	-1							1.33447	0.722425	0.995914	1.31486	0.000212778	4.21079e-05	7.50801e-06	6.11645e-07	FALSE
152.143	positive	0.0952784	C10H17N	CHN_pos	3	amantadine adamantan-2-amine	HMDB0015051 HMDB0245006	Organonitrogen compounds Organonitrogen compounds	C06818	NA NA		0.429566	0.824372	0.637315	0.229746	0.000408169	7.61537e-05	0.168681	0.00869559	FALSE
152.151	positive	-0.00926268	[13C]C10H18	[13C]CH_pos	3							0.420332	0.431896	0.26956	0.189384	0.0738743	0.00914589	0.0311429	0.00169938	FALSE
152.947	positive											0.486221	0.466132	2.17443	1.87083	0.0285759	0.00377773	6.45223e-05	4.6363e-06	TRUE
152.953	positive											1.08796	0.928363	0.979483	1.87895	0.000161591	3.29335e-05	1.88409e-10	3.66599e-11	FALSE
152.965	positive											1.67803	0.312542	2.78205	0.755172	0.00231298	0.000370141	0.0680286	0.00362244	FALSE
152.972	positive											0.849981	0.833352	2.05898	2.19297	3.03213e-06	9.13496e-07	1.20489e-09	1.91803e-10	TRUE
152.977	positive											0.643106	0.332419	2.30777	0.72875	0.0667094	0.00831444	0.0739492	0.00392994	FALSE
152.997	positive											0.672184	0.758692	1.08107	1.08866	1.24103e-07	5.35325e-08	5.39543e-12	1.6537e-12	FALSE
153.014	positive											0.784327	0.867432	2.64601	1.78129	0.0141018	0.00196391	2.48348e-06	2.16972e-07	TRUE
153.016	positive											1.34862	0.992866	0.921082	1.57281	1.41918e-05	3.64995e-06	1.15841e-05	9.17503e-07	FALSE
153.018	positive	0.230247	C7H4O4	CHO4_pos	6							1.18524	1.03509	1.56507	1.52026	0.00295224	0.000462727	3.08719e-08	3.72185e-09	TRUE
153.034	positive											1.0077	0.644683	1.38083	1.33375	5.11939e-11	9.02838e-11	0.00189707	0.000115618	FALSE
153.05	positive											0.786246	0.211615	1.13348	0.0658958	0.024086	0.00321947	0.755895	0.0367845	FALSE
153.052	positive											0.617948	1.15073	0.775932	1.76512	9.63373e-06	2.5921e-06	0.000147675	1.01712e-05	FALSE
153.055	positive	-0.00263076	C8H8O3	CHO3_pos	5	4-hydroxyphenylacetic acid 3-hydroxyphenylacetic acid o-hydroxyphenylacetic acid (S)-mandelic acid cresotic acid 4-hydroxy-3-methylbenzoic acid vanillin paraben o-anisic acid M-methoxybenzoic acid resorcinol, monoacetate	HMDB0000020 HMDB0000440 HMDB0000669 HMDB0000703 HMDB0002390 HMDB0004815 HMDB0012308 HMDB0032572 HMDB0032604 HMDB0032606 HMDB0257165	Phenols Phenols Benzene and substituted derivatives Benzene and substituted derivatives Benzene and substituted derivatives Benzene and substituted derivatives Phenols Benzene and substituted derivatives Benzene and substituted derivatives Benzene and substituted derivatives Phenol esters	C00642 C05593 C05852 C01984 C14088 C00755 C12064	Tyrosine metabolism NA NA NA NA NA NA NA NA NA NA	Tyrosine metabolism	1.10276	0.101198	0.858899	0.0451075	2.47229e-09	1.87405e-09	0.53003	0.0261873	FALSE
153.058	positive											1.00877	0.360551	2.41163	-0.829745	0.000372038	6.99157e-05	0.0030815	0.000183829	FALSE
153.066	positive	-0.0249904	C7H8N2O2	CHN2O2_pos	5	1-methyl-6-oxopyridine-3-carboxamide 1-methyl-4-oxopyridine-3-carboxamide 2H-1,3-benzodioxole-5,6-diamine (pyridin-2-ylamino)acetic acid benzoylhydrazine, O-hydroxy N-methyl-4-oxo-1H-pyridine-3-carboxamide benzoylhydrazine, P-hydroxy ethyl 2,3-dicyanopropanoate N-methyl-2-oxopyridine-1-carboxamide P-nitro-N-methylaniline N-methyl-6-oxo-1H-pyridine-3-carboxamide	HMDB0004193 HMDB0004194 HMDB0244157 HMDB0244956 HMDB0245152 HMDB0246137 HMDB0246451 HMDB0252027 HMDB0254609 HMDB0255170 HMDB0255171	Pyridines and derivatives Pyridines and derivatives Benzodioxoles Carboxylic acids and derivatives Benzene and substituted derivatives Pyridines and derivatives Benzene and substituted derivatives Fatty Acyls Pyridines and derivatives Benzene and substituted derivatives Pyridines and derivatives	C05842 C05843	Nicotinate and nicotinamide metabolism Nicotinate and nicotinamide metabolism NA NA NA NA NA NA NA NA NA	Nicotinate and nicotinamide metabolism	0.879554	0.654232	1.07918	0.632802	0.00200192	0.000324063	4.4164e-08	5.16258e-09	FALSE
153.067	positive											1.26877	0.929397	1.17887	1.04695	0.00310719	0.000485692	3.77859e-09	5.41102e-10	FALSE
153.089	positive											1.01267	1.0207	0.363857	0.15231	0.169742	0.0198487	0.381589	0.0190866	FALSE
153.091	positive	0.0276164	C9H12O2	CHO2_pos	4	2-methoxyethoxybenzene 4-isopropoxyphenol cumene hydroperoxide	HMDB0243568 HMDB0246479 HMDB0250588	Phenol ethers Phenols Benzene and substituted derivatives		NA NA NA		0.942968	0.516266	0.476624	0.125191	4.63227e-05	1.05899e-05	0.0755371	0.00401168	FALSE
153.093	positive											0.62419	1.67447	0.725569	-1.09182	0.123068	0.01474	0.00165072	0.000101189	FALSE
153.102	positive	-0.0604885	C8H12N2O	CHN2O_pos	4	2-isopropyl-6-methylpyrimidin-4-ol	HMDB0245733	Diazines		NA		0.868117	0.767808	1.23213	1.11694	0.0194678	0.00264374	2.99763e-05	2.24861e-06	FALSE
153.118	positive											0.996634	0.237435	-1.06496	-0.434154	0.000384141	7.20075e-05	0.0433569	0.00234789	FALSE
153.124	positive											0.398831	0.269646	-0.165415	0.49897	0.72753	0.0767949	0.252674	0.0128317	FALSE
153.127	positive	-0.0078885	C10H16O	CHO_pos	3	(-)-perillylalcohol deca-2,4-dienal 3,7-dimethyl-2,6-octadienal	HMDB0003634 HMDB0243576 HMDB0250303	Prenol lipids Organooxygen compounds Prenol lipids	C02452	NA NA NA		0.860079	1.25061	0.65507	0.707162	1.82906e-06	5.81094e-07	2.67226e-12	9.12489e-13	FALSE
153.131	positive											0.288124	0.262982	0.544821	0.216515	0.184045	0.021391	0.587651	0.0289222	FALSE
153.131	positive	0.169598	[13C]C5H17NO3	[13C]CHNO3_pos	-1							1.1207	0.549125	0.561901	1.13431	0.288874	0.032603	2.48984e-05	1.89348e-06	FALSE
153.164	positive	0.0223454	C11H20	CH_pos	2							0.795158	0.259316	0.780519	0.15508	5.63647e-06	1.61372e-06	0.080921	0.00428541	FALSE
153.956	positive											0.881016	1.23019	1.04271	0.997062	2.47888e-06	7.60516e-07	3.4992e-16	1.48834e-15	FALSE
154.035	positive											0.76478	1.5335	1.36753	1.45374	7.01712e-07	2.50227e-07	3.19219e-05	2.38349e-06	FALSE
154.05	positive	-0.0614208	C7H7NO3	CHNO3_pos	5	3-hydroxyanthranilic acid 3-aminosalicylic acid aminosalicylic acid mesalazine 3-methyl-4-nitrophenol nitroanisole 4-nitrobenzyl alcohol benzamide, 2,5-dihydroxy- salicylhydroxamic acid 2-(aminooxy)benzoic acid 3-formyl-6H-pyran-2-carboxamide	HMDB0001476 HMDB0001972 HMDB0014378 HMDB0014389 HMDB0245927 HMDB0246530 HMDB0246534 HMDB0252697 HMDB0257460 HMDB0257563 HMDB0260351	Benzene and substituted derivatives Benzene and substituted derivatives Benzene and substituted derivatives Benzene and substituted derivatives Phenols Benzene and substituted derivatives Benzene and substituted derivatives Benzene and substituted derivatives Benzene and substituted derivatives Benzene and substituted derivatives Pyrans	C00632 C02518 C07555 C11343	Tryptophan metabolism NA NA NA NA NA NA NA NA NA NA	Tryptophan metabolism	1.22991	0.975299	1.48145	0.936806	3.55091e-09	2.51862e-09	3.04857e-12	1.02653e-12	FALSE
154.058	positive	0.0313622	[13C]C7H8O3	[13C]CHO3_pos	5							0.633805	0.0872698	0.974139	0.0419268	2.2398e-05	5.49603e-06	0.52326	0.0258634	FALSE
154.062	positive											0.196089	0.807824	0.483919	-1.57548	0.548007	0.059035	4.97324e-08	5.76348e-09	FALSE
154.071	positive											0.885564	1.34192	2.52762	1.47947	3.59453e-06	1.0662e-06	2.48503e-05	1.89041e-06	FALSE
154.086	positive	-0.0313564	C8H11NO2	CHNO2_pos	4	dopamine norden 2-(2-amino-1-hydroxyethyl)phenol 4-deoxypyridoxine isobutyl 2 cyanoacrylate butyl cyanoacrylate N-(4-ethoxyphenyl)hydroxylamine 2-cyanohept-2-enoic acid norfenefrine	HMDB0000073 HMDB0004825 HMDB0244914 HMDB0246408 HMDB0249423 HMDB0249472 HMDB0255158 HMDB0255379 HMDB0255737	Phenols Phenols Phenols Pyridines and derivatives Carboxylic acids and derivatives Carboxylic acids and derivatives Phenol ethers Fatty Acyls Phenols	C03758 C04227 C13415	Tyrosine metabolism | Tyrosine metabolism NA NA NA NA NA NA NA NA	Tyrosine metabolism | Tyrosine metabolism	1.25741	1.08748	1.02377	0.648202	7.11855e-10	6.74751e-10	1.29367e-07	1.38228e-08	FALSE
154.094	positive	-0.00391934	[13C]C8H12O2	[13C]CHO2_pos	4							0.843332	0.743251	0.363764	0.115863	0.000706934	0.000125915	0.110646	0.00580882	FALSE
154.099	positive											0.266368	0.755033	0.247568	0.857542	0.747828	0.0788251	0.00468349	0.000274999	FALSE
154.107	positive	0.23514	C5H15NO4	CHNO4_pos	-1							0.664733	0.906525	1.67127	1.45937	0.00183619	0.000299478	1.10492e-05	8.79446e-07	FALSE
154.123	positive	-0.0013062	C9H15NO	CHNO_pos	3	2-azaspiro[4.5]dec-2-en-3-ol	HMDB0247166	Azaspirodecane derivatives		NA		1.00771	0.911735	0.998345	0.553163	1.54861e-06	5.0215e-07	7.26798e-09	9.82744e-10	FALSE
154.131	positive	-0.0391841	[13C]C9H16O	[13C]CHO_pos	3							0.721842	1.23567	0.605117	0.704769	1.04191e-05	2.78321e-06	3.60818e-12	1.17419e-12	FALSE
154.134	positive	-0.350037	C8H15N3	CHN3_pos	3							0.880229	1.10218	1.07044	1.56329	2.52249e-06	7.72982e-07	8.97485e-07	8.39135e-08	FALSE
154.159	positive	0.0287297	C10H19N	CHN_pos	2	decanenitrile	HMDB0250917	Organonitrogen compounds		NA		1.02617	0.693942	0.598141	1.61568	0.0460572	0.00588181	3.44654e-09	4.96191e-10	FALSE
154.907	positive											2.04623	0.751851	1.20275	1.60012	4.27908e-12	1.99879e-11	0.00408328	0.000240983	FALSE
154.964	positive											1.04602	0.773295	1.57308	0.99736	1.07798e-06	3.63644e-07	4.65472e-09	6.51181e-10	FALSE
154.986	positive											0.463487	0.836556	1.42486	1.27739	4.76136e-06	1.38226e-06	0.000339343	2.24049e-05	FALSE
154.993	positive											0.335497	0.834493	0.602343	1.18059	0.465657	0.0507542	6.49662e-05	4.66543e-06	FALSE
155.002	positive											0.96153	1.40763	1.53649	1.4706	2.56895e-07	1.02617e-07	0.000762065	4.82518e-05	FALSE
155.016	positive											1.05621	0.24431	2.19517	0.430879	2.0711e-05	5.14539e-06	0.0428618	0.0023216	FALSE
155.03	positive											1.13825	0.547509	1.11462	1.37339	0.00345527	0.000535261	2.05581e-05	1.57776e-06	FALSE
155.031	positive											1.01872	1.2905	1.17203	1.49652	3.18516e-10	3.56689e-10	1.27211e-13	7.96932e-14	FALSE
155.034	positive	-0.0324619	C7H6O4	CHO4_pos	5	2,5-dihydroxybenzoic acid 2,3-dihydroxy-benzoic acid 3,4-dihydroxybenzoic acid 2,6-dihydroxybenzoic acid 3,5-dihydroxybenzoic acid 2,4-dihydroxybenzoic acid 2,4,6-trihydroxybenzaldehyde 3,4,5-trihydroxybenzaldehyde terreic acid	HMDB0000152 HMDB0000397 HMDB0001856 HMDB0013676 HMDB0013677 HMDB0029666 HMDB0125090 HMDB0246043 HMDB0258836	Benzene and substituted derivatives Benzene and substituted derivatives Benzene and substituted derivatives Benzene and substituted derivatives Benzene and substituted derivatives Benzene and substituted derivatives Phenols Phenols Organooxygen compounds	C00628 C00196 C00230	NA NA NA NA NA NA NA NA NA		1.28775	0.901555	1.21402	1.06337	2.8942e-08	1.50815e-08	3.58213e-12	1.16728e-12	FALSE
155.045	positive	0.205144	C6H6N2O3	CHN2O3_pos	5	2-amino-4-nitrophenol phenol, 4-amino-2-nitro- acipimox	HMDB0244990 HMDB0246341 HMDB0247941	Phenols Phenols Diazines	C19321 C19323	NA NA NA		1.1795	1.19247	1.61356	1.57192	0.000280052	5.39991e-05	3.54119e-11	8.45013e-12	TRUE
155.047	positive											0.590847	0.877225	0.478349	0.810733	0.109491	0.0132146	7.62064e-05	5.434e-06	FALSE
155.053	positive											0.925898	1.81606	-0.857184	-1.41357	0.196046	0.0226943	6.40344e-05	4.60534e-06	FALSE
155.059	positive											1.27992	0.545767	1.663	-0.743447	3.88996e-05	9.03224e-06	0.0015268	9.39492e-05	FALSE
155.068	positive											0.680264	1.36636	0.815698	1.29518	1.57606e-06	5.10731e-07	1.14396e-10	2.35637e-11	FALSE
155.07	positive	-0.00259634	C8H10O3	CHO3_pos	4	hydroxytyrosol 2,6-dimethoxyphenol 6-ethyl-3-hydroxy-2-methylpyran-4-one hexahydrophthalic anhydride	HMDB0005784 HMDB0034158 HMDB0247055 HMDB0253140	Phenols Phenols Pyrans Isobenzofurans	C10787	NA NA NA NA		1.27863	0.885219	0.806335	0.314616	3.25098e-08	1.66069e-08	1.49835e-05	1.16692e-06	FALSE
155.073	positive											1.10354	1.87283	1.55314	-1.22515	0.000709263	0.000126113	1.44159e-05	1.12561e-06	FALSE
155.081	positive	-0.154471	C7H10N2O2	CHN2O2_pos	4	6-propyl-1,3-dihydropyrimidine-2,4-dione hexahydropyrrolo[1,2-a]piperazine-1,4-dione hepta-2,5-dienediamide N-{[(1-hydroxyprop-2-en-1-ylidene)amino]methyl}prop-2-enimidic acid	HMDB0247095 HMDB0253141 HMDB0254632 HMDB0255276	Diazines Carboxylic acids and derivatives Carboxylic acids and derivatives Carboxylic acids and derivatives		NA NA NA NA		0.806496	1.15878	1.50622	1.43111	1.05961e-05	2.82757e-06	5.20311e-07	5.07421e-08	FALSE
155.086	positive	0.0869688	C12H10	CH_pos	8	acenaphthene	HMDB0247899	Naphthalenes	C19312	NA		0.629532	0.192213	1.16168	0.16867	0.000124325	2.59506e-05	0.0219027	0.00120877	FALSE
155.09	positive											0.908628	1.03602	1.43434	1.11692	0.00448707	0.000683661	4.89406e-05	3.57279e-06	FALSE
155.104	positive											0.778446	1.74937	0.201134	-0.349655	0.603656	0.0645072	0.100384	0.00527809	FALSE
155.107	positive	0.0272551	C9H14O2	CHO2_pos	3	4-oxo-2-nonenal	HMDB0245270	Organooxygen compounds		NA		1.08193	0.96288	0.514802	0.325446	1.21581e-05	3.19021e-06	1.1741e-05	9.29321e-07	FALSE
155.109	positive											0.263716	1.59888	0.315909	-0.652598	0.627912	0.0669336	0.0456256	0.00246304	FALSE
155.118	positive	-0.0596974	C8H14N2O	CHN2O_pos	3	methoxy[(1-methyl-5,6-dihydro-2H-pyridin-3-yl)methylidene]amine N-methyl-2-oxa-6-azatricyclo[4.2.1.0³,⁷]nonan-8-amine	HMDB0254718 HMDB0259596	Pyridines and derivatives Loline alkaloids and derivatives		NA NA		0.973497	0.348534	0.773542	0.584456	0.0290524	0.00383389	8.1028e-06	6.57228e-07	FALSE
155.132	positive											0.661092	0.381916	1.13584	0.443592	0.00143867	0.00023962	0.0205816	0.00113975	FALSE
155.134	positive											0.238214	0.651338	-0.0513083	0.671473	0.82889	0.0864902	2.99127e-08	3.61519e-09	FALSE
155.143	positive	-0.00778534	C10H18O	CHO_pos	2	1,8-cineole (4Z)-dec-4-enal 3,7-dimethyl-2,6-octadien-1-ol baros	HMDB0004472 HMDB0041014 HMDB0247145 HMDB0249350	Oxanes Organooxygen compounds Prenol lipids Prenol lipids	C09844 C01411	NA NA NA NA		0.428454	0.725754	0.616882	0.532286	6.13085e-05	1.3637e-05	3.87839e-07	3.84889e-08	FALSE
155.154	positive	0.0999046	C9H18N2	CHN2_pos	2							1.02587	0.914575	0.237934	1.17674	0.444264	0.048545	5.41616e-06	4.50309e-07	FALSE
155.179	positive	-0.172534	C11H22	CH_pos	1							0.784228	0.599593	0.643795	0.483394	0.204352	0.0236083	0.000296589	1.97055e-05	FALSE
155.99	positive											1.44849	1.65771	1.66861	2.69967	1.17617e-07	5.08615e-08	2.11048e-08	2.61991e-09	TRUE
156.027	positive											0.855049	0.993692	1.72642	1.28385	1.48067e-05	3.7949e-06	1.33142e-06	1.21259e-07	FALSE
156.029	positive	-0.219324	C6H5NO4	CHNO4_pos	5	3-nitrobenzene-1,2-diol	HMDB0245948	Phenols		NA		1.00274	0.921674	1.22778	1.42015	0.00117269	0.000199614	3.08658e-08	3.72297e-09	FALSE
156.05	positive											0.524177	1.40966	0.92258	1.43677	0.0147997	0.00205613	1.11747e-05	8.88265e-07	FALSE
156.066	positive	-0.0606224	C7H9NO3	CHNO3_pos	4	3-amino-4-methoxybenzene-1,2-diol	HMDB0254544	Phenols		NA		1.48317	1.1724	1.23877	1.29056	1.22078e-11	3.63769e-11	7.05045e-16	2.37406e-15	FALSE
156.074	positive	0.0309545	[13C]C7H10O3	[13C]CHO3_pos	4							0.735785	0.804813	0.746929	0.262608	5.99422e-07	2.16883e-07	0.000767559	4.85743e-05	FALSE
156.077	positive	0.368867	C6H9N3O2	CHN3O2_pos	4	L-histidine histidine	HMDB0000177 HMDB0250763	Carboxylic acids and derivatives Carboxylic acids and derivatives	C00135 C00768	beta-Alanine metabolism | Histidine metabolism | Nitrogen metabolism NA	beta-Alanine metabolism | Histidine metabolism | Nitrogen metabolism	0.620345	1.08785	1.59896	1.32115	2.52617e-08	1.34614e-08	3.46126e-09	4.98014e-10	FALSE
156.081	positive	0.22183	C11H9N	CHN_pos	8	2-phenylpyridine 5-phenylpenta-2,4-dienenitrile	HMDB0245295 HMDB0246839	Pyridines and derivatives Benzene and substituted derivatives		NA NA		0.815043	0.818261	1.60362	0.701946	8.76546e-05	1.88973e-05	1.30232e-10	2.64437e-11	FALSE
156.093	positive											0.543969	0.222622	0.711421	0.148475	0.180451	0.0210063	0.499323	0.0247256	FALSE
156.102	positive	0.0335279	C8H13NO2	CHNO2_pos	3	2-aminobicyclo[2.2.1]heptane-2-carboxylic acid 5-(2-aminoethyl)cyclohexa-2,4-diene-1,2-diol bemegride retronecine 3-ethyl-5-hydroxy-4,5-dimethyl-1H-pyrrol-2-one 4-(2-aminoethyl)cyclohexa-3,5-diene-1,2-diol 9-methyl-3-oxa-9-azatricyclo[3.3.1.0²,⁴]nonan-7-ol	HMDB0245588 HMDB0246265 HMDB0248936 HMDB0253071 HMDB0253169 HMDB0257596 HMDB0258181	Prenol lipids Organooxygen compounds Piperidines Pyrrolines Organooxygen compounds Oxazinanes		NA NA NA NA NA NA NA		1.21037	1.01961	0.898059	0.620949	1.27445e-08	7.35843e-09	4.12856e-08	4.8589e-09	FALSE
156.11	positive	-0.0038684	[13C]C8H14O2	[13C]CHO2_pos	3							1.2141	0.947476	0.405424	0.341967	0.000781958	0.000137763	5.98463e-05	4.31822e-06	FALSE
156.138	positive	-0.00128923	C9H17NO	CHNO_pos	2	pentamethylcyclopropane-1-carboxamide	HMDB0250674	Carboxylic acids and derivatives		NA		0.867484	0.960704	0.943765	0.961799	9.57799e-07	3.27146e-07	1.57816e-13	9.51771e-14	FALSE
156.146	positive	0.0257833	[13C]C9H18O	[13C]CHO_pos	2							0.411219	0.68898	0.542716	0.513394	0.00108043	0.000185065	1.30606e-06	1.19173e-07	FALSE
156.175	positive	0.221696	C10H21N	CHN_pos	1	propylhexedrine pempidine	HMDB0015659 HMDB0256215	Organonitrogen compounds Piperidines		NA NA		0.199916	0.392823	0.468328	0.761994	0.470166	0.0512026	0.0270565	0.0014824	FALSE
156.948	positive											1.04247	1.54052	1.52434	1.2718	1.48541e-08	8.38049e-09	2.09161e-12	7.44629e-13	FALSE
156.974	positive											1.80019	0.472011	1.09412	1.1014	8.5901e-07	2.98918e-07	0.0536281	0.00288158	FALSE
156.979	positive											0.866087	0.81798	1.63889	1.69963	2.00885e-05	5.00273e-06	7.0751e-08	7.98185e-09	TRUE
156.992	positive											0.540977	0.222675	1.24778	0.67144	2.74538e-05	6.61146e-06	0.218493	0.0111613	FALSE
156.997	positive											1.76148	0.794263	1.22441	1.11546	6.97687e-10	6.66194e-10	3.90808e-06	3.321e-07	FALSE
157.011	positive											0.744304	1.16513	1.36699	1.2644	0.00109141	0.00018676	9.23851e-08	1.0112e-08	FALSE
157.013	positive	0.00256401	C6H4O5	CHO5_pos	5	2,5-furandicarboxylic acid 3-hydroxy-4-oxopyran-2-carboxylic acid (2,5-dioxofuran-3-yl)acetic acid	HMDB0004812 HMDB0245887 HMDB0250284	Furans Pyrans Carboxylic acids and derivatives	C20450	NA NA NA		0.758318	0.877153	0.631497	1.04465	0.108019	0.0130521	5.68999e-05	4.11911e-06	FALSE
157.017	positive											0.657761	0.995329	1.6954	2.43118	0.0118839	0.0016826	0.000649414	4.14547e-05	TRUE
157.047	positive											0.780805	0.816305	1.05885	1.45248	2.70675e-06	8.24087e-07	0.000530017	3.41932e-05	FALSE
157.05	positive	0.0320426	C7H8O4	CHO4_pos	4							1.44759	1.15693	1.18991	0.955423	7.49057e-11	1.19501e-10	3.32212e-14	2.86626e-14	FALSE
157.061	positive	0.0102529	C6H8N2O3	CHN2O3_pos	4	2-hydroxy-3-(imidazol-1-yl)propanoic acid 1,5-dimethyl-1,3-diazinane-2,4,6-trione 3-(imidazol-5-yl)lactic acid	HMDB0002320 HMDB0244233 HMDB0253418	Azoles Diazines Azoles	C05132 C05568	NA NA NA		1.07303	1.10127	1.52669	1.39147	2.37545e-05	5.78779e-06	2.67059e-08	3.25685e-09	FALSE
157.065	positive	-0.00768947	C11H8O	CHO_pos	8							0.325618	0.427092	0.159445	-0.239715	0.7063	0.0746451	0.0311644	0.00170017	FALSE
157.076	positive	0.290897	C10H8N2	CHN2_pos	8	indole-3-acetonitrile bipyridyl bipyridine	HMDB0006524 HMDB0245352 HMDB0246599	Indoles and derivatives Pyridines and derivatives Pyridines and derivatives	C02938	NA NA NA		1.141	0.512963	1.46106	0.851195	9.13245e-07	3.14414e-07	1.02013e-06	9.44339e-08	FALSE
157.084	positive	-0.00256284	[13C]C10H9N	[13C]CHN_pos	8							1.20484	0.506641	2.22056	0.751885	0.000257907	5.01207e-05	5.39357e-09	7.45935e-10	FALSE
157.086	positive	-0.00256281	C8H12O3	CHO3_pos	3							1.18973	1.19289	0.749262	0.576044	1.23866e-08	7.17578e-09	2.86445e-10	5.32155e-11	FALSE
157.097	positive	-0.0243449	C7H12N2O2	CHN2O2_pos	3	2-ethyl-1-(C-hydroxycarbonimidoylimino)but-2-en-1-ol	HMDB0242468	Organic carbonic acids and derivatives		NA		1.10996	1.05634	1.15044	1.33545	0.000191588	3.82798e-05	4.38517e-08	5.13102e-09	FALSE
157.101	positive	0.0217818	C12H12	CH_pos	7	1,2-dimethylnaphthalene 1,4-dimethylnaphthalene hexa-1,3,5-trien-1-ylbenzene	HMDB0244083 HMDB0244215 HMDB0247104	Naphthalenes Naphthalenes Benzene and substituted derivatives	C14329	NA NA NA		0.35159	0.379663	0.382727	0.259978	0.0563877	0.00709794	6.9862e-05	5.00516e-06	FALSE
157.12	positive											1.37438	1.29008	0.219045	-0.197425	0.629868	0.0671284	0.414337	0.0206565	FALSE
157.122	positive	0.0269032	C9H16O2	CHO2_pos	2	trans-4-hydroxy-2-nonenal 4 hydroxynonenal hexyl acrylate 2-hydroxynon-2-enal 9-hydroxynon-2-enal	HMDB0004362 HMDB0245269 HMDB0253165 HMDB0253280 HMDB0257844	Fatty Acyls Fatty Acyls Carboxylic acids and derivatives Organooxygen compounds Fatty Acyls		NA NA NA NA NA		0.93235	0.952719	0.641884	0.361981	2.26392e-05	5.54997e-06	1.35308e-06	1.23093e-07	FALSE
157.125	positive											0.954846	1.40219	-0.0101968	-0.486414	0.987306	0.101308	0.0881391	0.00465648	FALSE
157.134	positive	0.00512406	C8H16N2O	CHN2O_pos	2	N-[3-(dimethylamino)propyl]prop-2-enimidic acid	HMDB0246231	Carboxylic acids and derivatives		NA		0.661091	1.04782	1.56473	2.06489	3.84389e-06	1.13304e-06	1.33544e-05	1.04813e-06	TRUE
157.15	positive											0.462268	0.207573	-0.235978	0.214312	0.550555	0.0592849	0.4262	0.0212217	FALSE
157.159	positive	-0.00768485	C10H20O	CHO_pos	1	menthol decanal	HMDB0003352 HMDB0011623 HMDB0258008	Prenol lipids Organooxygen compounds Organooxygen compounds	C00400 C12307	NA NA NA		0.784163	0.949113	-0.010738	0.575983	0.92654	0.0957164	2.01015e-08	2.5095e-09	FALSE
157.17	positive	0.0345793	C9H20N2	CHN2_pos	1							2.40993	1.92051	1.20507	1.06434	2.39033e-11	5.5827e-11	5.19313e-17	5.03612e-16	FALSE
157.952	positive											0.916404	1.24453	1.97376	1.88799	1.30981e-05	3.40072e-06	1.58028e-14	1.70279e-14	TRUE
157.999	positive											0.686965	0.501176	2.53141	0.478998	0.00454108	0.000691281	0.351554	0.0176207	FALSE
158.012	positive											1.42959	0.562902	2.21873	1.26245	0.000901187	0.000156273	0.00680669	0.000393567	FALSE
158.045	positive	0.0382074	C6H7NO4	CHNO4_pos	4	2,5-dioxopyrrolidin-1-yl acetate 1,2-dimethyl-3,4-dioxoazetidine-2-carboxylic acid	HMDB0244630 HMDB0257875	Pyrrolidines Carboxylic acids and derivatives		NA NA		1.03672	0.995834	1.51506	1.36431	1.06973e-06	3.61095e-07	5.54573e-10	9.54234e-11	FALSE
158.053	positive	0.0649493	[13C]C6H8O4	[13C]CHO4_pos	4							0.756231	0.870856	1.07641	1.41275	0.0449971	0.00576062	3.83098e-08	4.54397e-09	FALSE
158.081	positive	0.00381986	C7H11NO3	CHNO3_pos	3	(3-methylbut-2-enamido)acetic acid paramethadione (2-methylbut-2-enamido)acetic acid	HMDB0000459 HMDB0014755 HMDB0247952	Carboxylic acids and derivatives Azolidines Carboxylic acids and derivatives	C07411	NA NA NA		1.20256	1.17668	1.32714	1.33103	3.83898e-12	1.8778e-11	4.7111e-16	1.73055e-15	FALSE
158.089	positive	0.0305573	[13C]C7H12O3	[13C]CHO3_pos	3							1.15951	1.10997	0.632471	0.500322	4.5035e-08	2.1925e-08	0.000251974	1.68988e-05	FALSE
158.096	positive	-0.0356485	C11H11N	CHN_pos	7							0.849586	0.884993	1.08691	0.666749	3.61663e-06	1.07215e-06	1.14214e-09	1.82653e-10	FALSE
158.105	positive	0.118398	[13C]C11H12	[13C]CH_pos	7							0.571269	0.190582	0.832574	-0.13387	0.0719131	0.00892013	0.151209	0.0078382	FALSE
158.118	positive	0.0967473	C8H15NO2	CHNO2_pos	2	tranexamic acid homostachydrine 1-methylpiperidin-4-yl acetate 2-(dimethylamino)ethyl 2-methylprop-2-enoate methyl 1-methylpiperidine-3-carboxylate	HMDB0014447 HMDB0033433 HMDB0243931 HMDB0244940 HMDB0254560	Carboxylic acids and derivatives Carboxylic acids and derivatives Piperidines Carboxylic acids and derivatives Piperidines	C12535 C08283	NA NA NA NA NA		1.1761	1.03215	0.915204	0.886779	1.13921e-09	1.01315e-09	6.95579e-11	1.522e-11	FALSE
158.126	positive	-0.00381878	[13C]C8H16O2	[13C]CHO2_pos	2							0.944262	0.944433	0.631094	0.385833	3.30678e-05	7.8004e-06	1.91356e-06	1.70123e-07	FALSE
158.154	positive	-0.0012727	C9H19NO	CHNO_pos	1	2,2,6,6-tetramethylpiperidin-4-ol 2,2,6,6-tetramethylpiperidoxyl isovaleryl diethylamide 3-methyl-2-propylpentanamide	HMDB0245344 HMDB0245345 HMDB0253703 HMDB0257395	Piperidines Piperidines Fatty Acyls Fatty Acyls		NA NA NA NA		0.986921	0.981645	0.744822	0.541141	6.41605e-05	1.41741e-05	8.15529e-10	1.34594e-10	FALSE
158.162	positive	0.0254526	[13C]C9H20O	[13C]CHO_pos	1							1.03149	0.489795	-0.946586	0.434208	0.000268595	5.20027e-05	0.000116308	8.09587e-06	FALSE
158.173	positive	0.194699	[13C]C8H20N2	[13C]CHN2_pos	1							1.71899	1.52965	1.32041	1.41144	6.92503e-13	1.15824e-11	1.59114e-09	2.45237e-10	FALSE
158.953	positive											0.671667	1.15943	1.78447	2.01845	0.010408	0.0014899	2.89592e-11	7.06329e-12	TRUE
158.97	positive											0.760785	0.955462	1.78298	0.263129	0.0288257	0.0038059	0.351372	0.0176152	FALSE
158.974	positive											1.30611	0.870344	1.19951	1.10533	9.72765e-09	5.74451e-09	6.47867e-11	1.43312e-11	FALSE
158.988	positive											0.43185	0.703068	0.525113	1.23874	0.298959	0.0336825	0.00365832	0.000216641	FALSE
158.99	positive											0.564309	1.29895	0.787491	1.35743	0.0663836	0.0082798	0.000347307	2.29058e-05	FALSE
158.996	positive											0.723463	1.08954	1.29769	1.99853	1.73973e-05	4.38304e-06	1.45304e-12	5.46167e-13	FALSE
159.026	positive											0.463197	0.717991	1.2239	1.1563	0.195926	0.0226854	0.00264015	0.000158515	FALSE
159.029	positive	0.0658138	C6H6O5	CHO5_pos	4							1.08659	1.00356	1.52369	1.47811	4.75698e-05	1.0832e-05	1.03505e-07	1.12277e-08	FALSE
159.063	positive											0.469341	0.168763	0.917322	-0.0725896	0.0225361	0.00302556	0.893322	0.0430488	FALSE
159.065	positive	-0.031634	C7H10O4	CHO4_pos	3	succinylacetone 4,7-dioxoheptanoic acid	HMDB0000635 HMDB0246616	Keto acids and derivatives Keto acids and derivatives		NA NA		0.972465	0.434994	0.884543	-0.266247	1.29934e-07	5.58155e-08	0.0114897	0.000649924	FALSE
159.076	positive	-0.0531413	C6H10N2O3	CHN2O3_pos	3	4-hydroxy-5-propoxy-1,2-dihydropyrazol-3-one nitrosobis(2-oxopropyl)amine oxiracetam	HMDB0245976 HMDB0255200 HMDB0255986	Organooxygen compounds Organonitrogen compounds Carboxylic acids and derivatives		NA NA NA		0.91541	1.11607	1.66413	1.50413	1.62616e-08	9.08561e-09	7.39426e-11	1.60922e-11	TRUE
159.08	positive	-0.00759142	C11H10O	CHO_pos	7							0.881183	1.34986	0.822966	0.557177	6.31442e-07	2.27358e-07	9.58671e-11	2.0158e-11	FALSE
159.092	positive	-0.0290984	C10H10N2	CHN2_pos	7	1-benzylimidazole 1,2-diaminonaphthalene 1,5-diaminonaphthalene 2,3-naphthalenediamine α-nicotyrine	HMDB0243836 HMDB0244064 HMDB0244231 HMDB0245385 HMDB0255591	Azoles Naphthalenes Naphthalenes Naphthalenes Pyridines and derivatives	C19463 C10161	NA NA NA NA NA		1.31197	0.283125	1.55848	0.560462	8.16867e-07	2.8598e-07	1.0393e-06	9.60619e-08	FALSE
159.1	positive	0.566757	[13C]C10H11N	[13C]CHN_pos	7							0.725069	0.503674	1.18232	0.75155	0.000100472	2.13761e-05	7.72538e-05	5.50383e-06	FALSE
159.102	positive	-0.00253014	C8H14O3	CHO3_pos	2	[(1r,4r)-4-hydroxycyclohexyl]acetic acid 4-Keto-VPA 3-oxo-vpa	HMDB0000909 HMDB0060683 HMDB0060685	Organooxygen compounds Keto acids and derivatives Keto acids and derivatives	C16655 C16652	NA NA NA		1.18417	1.3503	0.936841	0.653844	4.96449e-09	3.31279e-09	4.30574e-12	1.36278e-12	FALSE
159.113	positive	-0.0240346	C7H14N2O2	CHN2O2_pos	2							1.02378	0.810698	1.19625	1.44528	4.19432e-11	7.90804e-11	3.07877e-12	1.03097e-12	FALSE
159.117	positive	0.0215041	C12H14	CH_pos	6	1-phenylcyclohexene	HMDB0243990	Benzene and substituted derivatives		NA		1.24234	1.43044	0.76368	0.493559	3.49208e-07	1.34818e-07	1.55304e-09	2.40436e-10	FALSE
159.121	positive	-0.0607158	[13C]C7H15NO2	[13C]CHNO2_pos	2							0.854976	0.644314	1.52011	1.06768	0.00169343	0.000278737	9.01983e-05	6.36062e-06	FALSE
159.138	positive	0.0265603	C9H18O2	CHO2_pos	1	nonanoic acid non-2-ene-1,4-diol 4-hydroxynonanal non-1-ene-1,4-diol	HMDB0000847 HMDB0245271 HMDB0246461 HMDB0246462	Fatty Acyls Fatty Acyls Fatty Acyls Fatty Acyls	C01601	NA NA NA NA		0.847453	0.719189	0.624053	0.315148	2.36644e-05	5.77127e-06	0.000125076	8.68375e-06	FALSE
159.149	positive	0.0682931	C8H18N2O	CHN2O_pos	1	N-(5-aminopentyl)propanamide N-(6-aminohexyl)acetamide N-nitrosodibutylamine	HMDB0254871 HMDB0255016 HMDB0255202	Carboxylic acids and derivatives Carboxylic acids and derivatives Organonitrogen compounds	C19277	NA NA NA		1.21646	1.37384	-0.065032	0.197577	0.774251	0.0813456	0.338657	0.0170059	FALSE
159.157	positive	-0.0316156	[13C]C8H19NO	[13C]CHNO_pos	1							1.0333	0.917618	0.650516	0.475562	0.000786483	0.000138372	1.77896e-07	1.86384e-08	FALSE
159.969	positive											0.484072	0.848586	1.41233	1.92195	6.63035e-10	6.4018e-10	4.56497e-12	1.42805e-12	FALSE
159.977	positive											0.812643	0.836341	1.9725	1.47642	0.00624876	0.000932617	6.01002e-08	6.86007e-09	FALSE
159.992	positive											0.54295	0.941151	1.05286	0.713461	0.0409121	0.00527018	0.0102376	0.000581267	FALSE
160.06	positive	0.0377232	C6H9NO4	CHNO4_pos	3	pyrrolidine-2,4-dicarboxylic acid	HMDB0242583	Carboxylic acids and derivatives		NA		1.03183	1.1989	1.5692	1.39815	1.30428e-10	1.74743e-10	1.17297e-14	1.3672e-14	FALSE
160.069	positive	0.00125738	[13C]C6H10O4	[13C]CHO4_pos	3							1.02662	0.771462	0.583889	-0.727849	0.00852921	0.00124397	3.55549e-07	3.55463e-08	FALSE
160.076	positive	-0.0641234	C10H9NO	CHNO_pos	7	1-aminonaphthalen-2-ol quinolin-2-ylmethanol 4-amino-1-naphthol	HMDB0243817 HMDB0245312 HMDB0246337	Naphthalenes Quinolines and derivatives Naphthalenes		NA NA NA		1.01003	0.404586	1.16904	0.380332	0.00093531	0.000161757	0.000233755	1.57335e-05	FALSE
160.084	positive	0.0251451	[13C]C10H10O	[13C]CHO_pos	7							1.58375	0.445152	1.61147	0.315347	4.21272e-08	2.07234e-08	0.000182731	1.24408e-05	FALSE
160.088	positive											1.6813	0.840318	1.3754	0.881557	8.24151e-09	5.00953e-09	3.69471e-08	4.40388e-09	FALSE
160.097	positive	0.00377146	C7H13NO3	CHNO3_pos	2	2-methylbutyrylglycine isovalerylglycine valerylglycine (-)-betonicine (2,2-dimethylpropanamido)acetic acid	HMDB0000339 HMDB0000678 HMDB0000927 HMDB0029412 HMDB0245297	Carboxylic acids and derivatives Carboxylic acids and derivatives Carboxylic acids and derivatives Carboxylic acids and derivatives Carboxylic acids and derivatives	C08269	NA NA NA NA NA		1.1407	1.041	1.1746	1.45903	3.52871e-10	3.86807e-10	4.99553e-12	1.54283e-12	FALSE
160.105	positive	0.0301702	[13C]C7H14O3	[13C]CHO3_pos	2							1.21596	0.838526	0.921989	0.533743	2.35429e-05	5.75245e-06	8.77696e-06	7.07178e-07	FALSE
160.112	positive	-0.223752	C11H13N	CHN_pos	6	pargyline	HMDB0015563	Benzene and substituted derivatives	C07414	NA		0.113312	0.432299	0.212783	0.112522	0.50184	0.0544234	0.144195	0.00748423	FALSE
160.12	positive	-0.00879878	[13C]C11H14	[13C]CH_pos	6							0.708864	0.447402	0.873766	0.331423	7.94716e-05	1.72913e-05	0.000273512	1.82724e-05	FALSE
160.133	positive	-0.0301648	C8H17NO2	CHNO2_pos	1	(+-)-2-aminooctanoic acid pregabalin 5-(trimethylammonio)pentanoate 2-ethyl-2,4,4-trimethyl-1,3-oxazolidin-3-ol 3-(aminomethyl)-5-methylhexanoic acid 8-aminooctanoic acid	HMDB0000991 HMDB0014375 HMDB0240732 HMDB0245114 HMDB0245784 HMDB0247418	Carboxylic acids and derivatives Carboxylic acids and derivatives Fatty Acyls Azolidines Carboxylic acids and derivatives Fatty Acyls		NA NA NA NA NA NA		1.32902	0.818218	0.76117	1.136	0.000189934	3.79933e-05	5.94441e-09	8.17454e-10	FALSE
160.141	positive	-0.00377041	[13C]C8H18O2	[13C]CHO2_pos	1							0.380186	0.303058	0.290905	-0.0842331	0.0247848	0.00330775	0.555805	0.0273994	FALSE
160.17	positive	-0.126914	C9H21NO	CHNO_pos	0							0.762727	1.0055	1.48372	1.87796	4.3087e-05	9.89815e-06	3.42754e-09	4.94336e-10	FALSE
160.976	positive											1.18879	0.952753	1.84048	1.2954	0.00178323	0.000291668	3.43947e-08	4.11381e-09	FALSE
161.006	positive											0.734009	0.79741	1.79967	1.17098	0.000542026	9.86085e-05	0.00224626	0.000135943	FALSE
161.012	positive											0.943552	0.855784	1.83687	1.17698	0.0012101	0.00020551	3.26274e-10	5.97902e-11	FALSE
161.039	positive											0.858618	0.608849	2.1323	1.0633	0.012146	0.00171596	5.73249e-05	4.1474e-06	FALSE
161.044	positive	0.00249942	C6H8O5	CHO5_pos	3	oxoadipate 2-[(2-oxopropanoyl)oxy]propanoic acid	HMDB0000225 HMDB0258108	Keto acids and derivatives Carboxylic acids and derivatives	C00322	Lysine degradation NA	Lysine degradation	1.09518	0.883021	1.65129	1.2243	3.18966e-07	1.24159e-07	3.96918e-11	9.36083e-12	FALSE
161.056	positive	-0.0187443	C5H8N2O4	CHN2O4_pos	3	5-amino-1,3,2-dioxazocane-4,8-dione	HMDB0248342	Carboxylic acids and derivatives		NA		1.16439	1.01834	2.54842	1.64685	5.4524e-05	1.22807e-05	5.29625e-07	5.15468e-08	TRUE
161.06	positive	0.0262414	C10H8O2	CHO2_pos	7	4-methylcoumarin 1,4-dihydroxynaphthalene	HMDB0246508 HMDB0255445	Coumarins and derivatives Naphthalenes	C14785	NA NA		1.51353	1.36821	0.981862	0.643384	3.86006e-09	2.6973e-09	1.83895e-12	6.6543e-13	FALSE
161.071	positive	0.0674732	C9H8N2O	CHN2O_pos	7	1H-indole-2-carboxamide indole-5-carboxamide 2-methylquinazolin-4-ol 1H-1,4-benzodiazepin-3-ol N-(quinolin-4-yl)hydroxylamine 5-amino-2H-isoquinolin-1-one	HMDB0244889 HMDB0244894 HMDB0245238 HMDB0245882 HMDB0246579 HMDB0246750	Indoles and derivatives Indoles and derivatives Diazanaphthalenes Benzodiazepines Quinolines and derivatives Isoquinolines and derivatives		NA NA NA NA NA NA		1.03109	0.68753	1.03276	-0.127214	0.00652797	0.000969821	0.409963	0.0204511	FALSE
161.081	positive	0.0312356	C7H12O4	CHO4_pos	2	(3S)-3-methylhexanedioic acid pimelic acid 2-methylhexanedioic acid 5,5-dihydroxyhept-6-enoic acid propanedioic acid, diethyl- methyl glutarate	HMDB0000555 HMDB0000857 HMDB0029167 HMDB0246781 HMDB0251250 HMDB0251385	Fatty Acyls Fatty Acyls Fatty Acyls Fatty Acyls Fatty Acyls Fatty Acyls	C02656	NA NA NA NA NA NA		1.13323	1.18299	0.940152	0.637105	4.96574e-08	2.39728e-08	4.32215e-10	7.62641e-11	FALSE
161.096	positive	-0.00749584	C11H12O	CHO_pos	6							0.781002	1.832	0.796356	0.784352	3.04149e-05	7.24383e-06	8.00564e-14	5.5773e-14	FALSE
161.117	positive	-0.00249828	C8H16O3	CHO3_pos	1	(S)-3-hydroxyoctanoic acid 5-OH-vpa 3-OH-vpa 4-OH-vpa 2-ethyl-6-hydroxyhexanoic acid	HMDB0001954 HMDB0013898 HMDB0013899 HMDB0013900 HMDB0245116	Hydroxy acids and derivatives Fatty Acyls Fatty Acyls Fatty Acyls Hydroxy acids and derivatives	C16650 C16651 C16649	NA NA NA NA NA		1.15746	1.09363	0.617898	0.797883	0.000855794	0.000149149	7.48603e-08	8.38302e-09	FALSE
161.132	positive	-0.0412177	C12H16	CH_pos	5							1.32111	1.77658	0.634079	0.706819	1.72181e-05	4.34423e-06	3.26923e-11	7.82425e-12	FALSE
161.137	positive	0.0649475	[13C]C7H17NO2	[13C]CHNO2_pos	1							0.800746	0.805202	0.857495	1.2704	0.0148374	0.00205971	6.14731e-06	5.06926e-07	FALSE
161.154	positive	-0.348431	C9H20O2	CHO2_pos	0	nonane-1,4-diol	HMDB0244213	Fatty Acyls		NA		0.779147	0.874588	1.34854	0.734414	3.9284e-06	1.15663e-06	0.000104668	7.33409e-06	FALSE
161.948	positive											0.956458	1.32414	2.43811	1.66873	0.000314253	6.00577e-05	5.32948e-10	9.18981e-11	TRUE
161.987	positive											0.316114	0.791103	-0.426583	-1.22328	0.0714251	0.00887233	0.000401887	2.63193e-05	FALSE
162.015	positive											0.644025	0.771449	1.31534	1.62213	2.69445e-07	1.06971e-07	1.03229e-09	1.66624e-10	FALSE
162.034	positive											1.08348	1.17343	1.33509	1.43773	1.91356e-06	6.04608e-07	5.18678e-08	5.9909e-09	FALSE
162.04	positive	0.0086939	C5H7NO5	CHNO5_pos	3	2-aminopropanoyl 2-oxoethaneperoxoate 2-oxopropanoyl 2-aminoethaneperoxoate 2-(carboxyformamido)propanoic acid 2-amino-3-[(2-oxoacetyl)oxy]propanoic acid	HMDB0248103 HMDB0252865 HMDB0255220 HMDB0258250	Carboxylic acids and derivatives Carboxylic acids and derivatives Carboxylic acids and derivatives Carboxylic acids and derivatives		NA NA NA NA		0.888716	1.00824	1.83734	0.667956	0.00237854	0.00037946	0.000281841	1.87823e-05	FALSE
162.055	positive	-0.0298048	C9H7NO2	CHNO2_pos	7	5-hydroxy-1(2H)-isoquinolinone 4-hydroxyquinolin-2(1H)-one quinoline-2,3-diol 1H-indole-5-carboxylic acid	HMDB0244237 HMDB0245468 HMDB0245908 HMDB0253469	Isoquinolines and derivatives Quinolines and derivatives Quinolines and derivatives Indoles and derivatives	C16716	NA NA NA NA		1.07103	0.628541	1.29709	0.175789	1.62454e-09	1.34125e-09	0.325539	0.0163641	FALSE
162.063	positive	0.120455	[13C]C9H8O2	[13C]CHO2_pos	7							1.62643	0.427172	1.30037	0.409681	1.65756e-08	9.23121e-09	0.000245947	1.6522e-05	FALSE
162.076	positive	-0.0248341	C6H11NO4	CHNO4_pos	2	aminoadipate 3-aminohexanedioic acid 2-carboxy-2-(trimethylammonio)acetate	HMDB0000510 HMDB0245812 HMDB0249655	Carboxylic acids and derivatives Carboxylic acids and derivatives Carboxylic acids and derivatives	C00956	Lysine degradation NA NA	Lysine degradation	1.12023	1.12604	1.52924	1.37355	1.66138e-13	5.74272e-12	1.81619e-13	1.04589e-13	FALSE
162.084	positive	0.0633238	[13C]C6H12O4	[13C]CHO4_pos	2							0.962625	0.869042	0.873263	0.699706	0.121718	0.0145884	0.00649337	0.000376258	FALSE
162.091	positive	0.0608378	C10H11NO	CHNO_pos	6	tryptophol	HMDB0003447	Indoles and derivatives	C00955	NA		0.850299	0.537801	0.979598	0.357162	2.33256e-06	7.20314e-07	4.9818e-05	3.63137e-06	FALSE
162.099	positive	0.0248305	[13C]C10H12O	[13C]CHO_pos	6							0.675522	1.77808	0.793694	0.782148	5.88813e-05	1.31592e-05	1.42185e-13	8.74913e-14	FALSE
162.102	positive	-1.51215	C9H11N3	CHN3_pos	6							1.38808	0.440168	1.33727	0.178823	9.1554e-11	1.32968e-10	0.079292	0.00420281	FALSE
162.112	positive	0.00372427	C7H15NO3	CHNO3_pos	1	2-amino-3-hydroxy-4,4-dimethylpentanoic acid 2-[(2-hydroxyethyl)amino]-3-methylbutanoic acid	HMDB0244982 HMDB0254990	Carboxylic acids and derivatives Carboxylic acids and derivatives		NA NA		1.22082	1.14917	1.21175	1.49008	4.37567e-12	2.02566e-11	3.83028e-12	1.22671e-12	FALSE
162.128	positive	0.0893741	C11H15N	CHN_pos	5	N-phenylpiperidine	HMDB0243994	Piperidines		NA		0.494577	0.587405	0.0303758	0.309901	0.903677	0.0935783	0.00791506	0.000453972	FALSE
162.136	positive	-0.00868871	[13C]C11H16	[13C]CH_pos	5							0.576601	0.97119	0.492652	0.709752	0.0233844	0.00313134	1.81679e-06	1.62294e-07	FALSE
162.149	positive	0.0322698	C8H19NO2	CHNO2_pos	0							1.25048	0.813556	0.949732	1.46778	2.33553e-05	5.7147e-06	3.46969e-08	4.14792e-09	FALSE
162.932	positive											0.558851	0.479276	2.5886	0.786996	0.0135418	0.00189355	0.0479428	0.00258239	FALSE
162.961	positive											0.776265	1.42292	1.64465	1.33312	0.00017948	3.61533e-05	2.43777e-07	2.4969e-08	FALSE
162.991	positive											0.603895	1.21545	2.65776	3.14232	0.00795652	0.00116602	8.54034e-08	9.42437e-09	TRUE
163.003	positive	0.277786	C8H2O4	CHO4_pos	8							0.308145	0.728057	1.08201	1.55576	0.000845902	0.000147574	3.74355e-07	3.73034e-08	FALSE
163.008	positive											0.541405	0.674835	2.41413	1.64156	0.0135418	0.00189304	0.000207924	1.40809e-05	TRUE
163.016	positive											0.460202	0.896777	1.53322	1.94668	0.0350737	0.00457147	1.42898e-06	1.29609e-07	TRUE
163.018	positive	1.96777	C12H2O	CHO_pos	12							0.794405	1.3366	0.928767	1.67694	3.75147e-07	1.43232e-07	5.11188e-06	4.26474e-07	FALSE
163.028	positive											0.655746	0.493148	1.42697	1.24032	8.76821e-07	3.04095e-07	1.70078e-07	1.78889e-08	FALSE
163.035	positive											0.718966	1.58011	1.1545	-1.04027	0.279263	0.0316146	0.0088405	0.000504663	FALSE
163.045	positive											1.03215	0.758424	1.25723	1.63922	6.6098e-10	6.40581e-10	5.2811e-09	7.33309e-10	FALSE
163.05	positive	-0.146875	C8H6N2O2	CHN2O2_pos	7	2,3-dihydrophthalazine-1,4-dione 1,3-dihydroquinazoline-2,4-dione	HMDB0244628 HMDB0249051	Diazanaphthalenes Diazanaphthalenes		NA NA		1.1182	0.837921	2.35039	1.22282	0.00143172	0.000238846	0.000150188	1.03355e-05	FALSE
163.055	positive	1.5008	[13C]C3H7N3O4	[13C]CHN3O4_pos	3							0.934343	1.4307	0.910533	1.30867	0.000180681	3.63386e-05	8.99593e-05	6.34561e-06	FALSE
163.06	positive	0.00246833	C6H10O5	CHO5_pos	2	α-hydroxyadipic acid 3-hydroxyadipic acid meglutol 3,4-dihydroxy-5-(hydroxymethyl)oxolane-2-carbaldehyde 3-deoxyglucosone 2-(3,4-dihydroxyoxolan-2-yl)-2-hydroxyacetaldehyde lactic acid lactate 7-oxabicyclo[4.1.0]heptane-2,3,4,5-tetrol 2,3-dihydroxypropyl 2-oxopropanoate 1,5,6-trihydroxyhexane-2,3-dione	HMDB0000321 HMDB0000345 HMDB0000355 HMDB0245490 HMDB0245856 HMDB0246074 HMDB0247139 HMDB0247281 HMDB0252845 HMDB0255346	Fatty Acyls Hydroxy acids and derivatives Fatty Acyls Organooxygen compounds Fatty Acyls Oxolanes Carboxylic acids and derivatives Oxepanes Glycerolipids Fatty Acyls	C02360 C03761	NA NA NA NA NA NA NA NA NA NA		0.891192	1.20137	1.45695	1.42639	4.06329e-05	9.39266e-06	6.57826e-09	8.9901e-10	FALSE
163.071	positive	0.536825	C5H10N2O4	CHN2O4_pos	2	glutamine hydroxamate 2-amino-3-[(2-aminoacetyl)oxy]propanoic acid 2-amino-5-(aminooxy)-5-oxopentanoic acid	HMDB0252810 HMDB0255858 HMDB0258143	Carboxylic acids and derivatives Carboxylic acids and derivatives Carboxylic acids and derivatives		NA NA NA		0.871202	1.05682	1.63021	1.75395	0.000436983	8.08026e-05	4.74428e-07	4.66427e-08	TRUE
163.073	positive	1.97081	C6H6N6	CHN6_pos	7							1.07671	0.814691	-0.698454	-0.180126	0.331204	0.0370338	0.659076	0.0322933	FALSE
163.075	positive	0.025915	C10H10O2	CHO2_pos	6	3-butenoic acid, 4-phenyl- (E)-isosafrole	HMDB0246571 HMDB0253689	Benzene and substituted derivatives Benzodioxoles		NA NA		1.27937	1.31305	0.770953	0.440612	5.8686e-09	3.76119e-09	3.57375e-09	5.13894e-10	FALSE
163.097	positive	0.339319	C7H14O4	CHO4_pos	1	1-monobutyrin 3,4,5-trihydroxy-3-methylhexanal	HMDB0243949 HMDB0254966	Glycerolipids Organooxygen compounds		NA NA		0.7455	0.785905	0.977501	1.18547	2.66324e-06	8.12271e-07	0.000211949	1.43414e-05	FALSE
163.1	positive											1.15439	0.980571	0.961899	0.791912	0.000145547	2.99106e-05	1.86672e-11	4.77899e-12	FALSE
163.103	positive											0.840737	1.58624	0.830494	0.804657	0.0100447	0.00144267	4.83372e-14	3.75607e-14	FALSE
163.108	positive											0.939374	1.34179	0.0791985	-1.84049	0.868336	0.0901707	9.66888e-06	7.7441e-07	FALSE
163.112	positive	-0.00740263	C11H14O	CHO_pos	5							0.49456	0.424836	0.205023	-0.0937719	0.232658	0.0266411	0.287747	0.0145428	FALSE
163.115	positive											0.831125	1.30502	0.277087	-1.01445	0.658371	0.0700366	0.00048652	3.15466e-05	FALSE
163.123	positive	0.0949939	C10H14N2	CHN2_pos	5	nicoderm CQ anabasine nicotine phenylpiperazine	HMDB0001934 HMDB0004350 HMDB0243542 HMDB0243993	Pyridines and derivatives Pyridines and derivatives Diazinanes	C00745 C06180 C16150	NA NA NA NA		0.807234	1.1388	1.39791	1.4452	2.25095e-07	9.08952e-08	1.74537e-14	1.80834e-14	FALSE
163.133	positive	-0.00246722	C8H18O3	CHO3_pos	0	1-O-pentylglycerol 2-(2-butoxyethoxy)ethanol 4,4'-oxydi-2-butanol	HMDB0243976 HMDB0244918 HMDB0245040	Glycerolipids Organooxygen compounds Organooxygen compounds		NA NA NA		0.875457	0.661416	0.430029	0.559085	0.0126549	0.0017801	2.66053e-07	2.7136e-08	FALSE
163.148	positive	0.0209694	C12H18	CH_pos	4							1.3454	1.36938	0.613934	0.470363	1.38147e-06	4.53052e-07	5.8027e-09	7.99327e-10	FALSE
163.984	positive											0.449866	0.956966	-0.768693	-1.33371	0.0153101	0.00211571	9.36316e-06	7.5216e-07	FALSE
163.987	positive											0.948723	1.58054	1.44604	1.22258	2.66703e-06	8.12948e-07	1.16147e-15	3.43401e-15	FALSE
163.997	positive											0.85173	0.907925	1.803	1.64624	0.000944801	0.000163127	8.92403e-08	9.78985e-09	TRUE
164.013	positive	1.90055	C11HNO	CHNO_pos	12							1.23433	1.30284	2.65242	1.36566	0.00377358	0.000580237	1.63341e-05	1.26641e-06	FALSE
164.034	positive	-0.241678	C8H5NO3	CHNO3_pos	7							1.65812	0.747427	1.45814	1.21374	1.47484e-06	4.81238e-07	7.03489e-10	1.17705e-10	FALSE
164.046	positive											0.822523	0.63406	2.49098	1.59483	0.000977046	0.000168525	3.92955e-06	3.33573e-07	TRUE
164.053	positive											0.384951	0.676092	0.324484	0.239078	0.256494	0.0291899	0.00552751	0.000322526	FALSE
164.055	positive	-0.114077	C5H9NO5	CHNO5_pos	2							0.714566	1.14641	1.45514	1.96705	0.00391017	0.000599639	7.29789e-07	6.90867e-08	FALSE
164.071	positive	-0.213414	C9H9NO2	CHNO2_pos	6	6-hydroxy-3,4-dihydro-1H-quinolin-2-one 2-methyl-2,3-dihydro-1,3-benzoxazin-4-one	HMDB0246939 HMDB0249616	Quinolines and derivatives Benzoxazines		NA NA		1.21419	1.03309	1.33739	0.99897	2.72049e-09	2.01795e-09	5.70485e-10	9.79528e-11	FALSE
164.079	positive	0.0576434	[13C]C9H10O2	[13C]CHO2_pos	6							0.586022	0.752114	0.531762	0.351064	0.000708238	0.000126017	1.66261e-06	1.49513e-07	FALSE
164.083	positive											0.597039	0.223767	0.869889	-0.226216	0.021882	0.00294308	0.160918	0.00831661	FALSE
164.092	positive	0.0367908	C6H13NO4	CHNO4_pos	1							1.17431	1.27625	1.28299	1.23376	3.51625e-11	7.03913e-11	1.59199e-13	9.57727e-14	FALSE
164.107	positive	-0.00122624	C10H13NO	CHNO_pos	5	5-methoxy-2,3-dihydro-1H-inden-2-amine N-(2-phenylethyl)acetamide 2-amino-1-(4-methylphenyl)propan-1-one	HMDB0247336 HMDB0255222 HMDB0255719	Indanes Carboxylic acids and derivatives Organooxygen compounds	C06746	NA NA NA		0.835418	0.776192	0.864935	0.317173	4.55955e-07	1.70077e-07	5.51425e-05	3.99905e-06	FALSE
164.115	positive	0.0245237	[13C]C10H14O	[13C]CHO_pos	5							0.681612	0.47794	0.00309796	-0.10824	0.98817	0.101376	0.189184	0.00970504	FALSE
164.118	positive											0.761234	1.21357	0.187907	-1.42724	0.796825	0.0834973	0.000189819	1.29125e-05	FALSE
164.128	positive	0.0649825	C7H17NO3	CHNO3_pos	0							1.08999	0.951673	1.83361	1.71317	2.91273e-05	6.97239e-06	6.90828e-09	9.37243e-10	TRUE
164.136	positive	0.0294246	[13C]C7H18O3	[13C]CHO3_pos	0							0.969537	0.813672	0.408004	0.46922	0.016653	0.00228362	0.00139463	8.60568e-05	FALSE
164.143	positive	0.0269713	C11H17N	CHN_pos	4	mephentermine 3,7-dimethylnona-2,6-dienenitrile ethylamphetamine	HMDB0015452 HMDB0246081 HMDB0252099	Benzene and substituted derivatives Prenol lipids Benzene and substituted derivatives	C07889	NA NA NA		0.909569	1.01366	0.970311	0.584874	5.20496e-08	2.49881e-08	1.72792e-09	2.64135e-10	FALSE
164.151	positive	-0.00858137	[13C]C11H18	[13C]CH_pos	4							0.175044	0.666374	0.146207	0.366471	0.416657	0.0458083	0.000121719	8.46278e-06	FALSE
164.165	positive	0.0318711	C8H21NO2	CHNO2_pos	-1							1.09925	0.639753	0.722126	0.740826	0.249272	0.028418	0.0131306	0.000738608	FALSE
164.921	positive											0.752758	1.11539	1.39581	1.52596	2.63157e-05	6.36399e-06	9.0676e-13	3.68235e-13	FALSE
164.971	positive											1.16728	1.90668	1.59064	0.911812	4.22986e-06	1.23976e-06	4.38271e-13	2.0473e-13	FALSE
164.977	positive											1.12531	1.45676	1.55577	1.28289	6.87831e-10	6.62886e-10	1.44764e-10	2.88387e-11	FALSE
164.984	positive											0.722368	0.546629	1.63699	1.49922	6.57635e-06	1.85213e-06	1.9312e-06	1.71629e-07	FALSE
164.997	positive	1.97695	C11O2	CHO2_pos	12							0.801135	1.22181	1.03837	1.08696	0.000140231	2.88868e-05	2.15332e-09	3.23054e-10	FALSE
165.005	positive											0.566519	0.712161	1.31442	1.63898	7.87373e-07	2.77152e-07	8.71514e-13	3.58729e-13	FALSE
165.007	positive											0.164501	1.24111	0.559179	1.36896	0.149048	0.0176276	1.01461e-06	9.39583e-08	FALSE
165.008	positive	0.553655	C10N2O	CHN2O_pos	12							0.89602	0.69352	3.02798	1.96466	8.44732e-05	1.82798e-05	8.13692e-08	9.02437e-09	TRUE
165.018	positive	0.0304858	C8H4O4	CHO4_pos	7	pyrano[3,4-c]pyran-1,8-dione	HMDB0244906	Pyrans		NA		1.3965	0.905923	1.74542	1.30822	0.00731582	0.00107699	3.11532e-06	2.68211e-07	FALSE
165.034	positive	1.94359	C12H4O	CHO_pos	11							1.17307	0.854802	1.2003	1.13163	4.43536e-11	8.21315e-11	4.82257e-05	3.52272e-06	FALSE
165.051	positive											0.785789	1.10603	1.48443	1.03414	0.05787	0.00726336	0.00144609	8.91188e-05	FALSE
165.052	positive											0.563675	0.892818	0.690488	2.07501	0.00608032	0.000909309	0.000861778	5.42537e-05	FALSE
165.055	positive	-0.00243832	C9H8O3	CHO3_pos	6	phenylpyruvic acid m-coumaric acid coumaric acid O-coumaric acid cis-p-coumaric acid methyl 4-formylbenzoate	HMDB0000205 HMDB0001713 HMDB0002035 HMDB0002641 HMDB0030677 HMDB0254568	Benzene and substituted derivatives Cinnamic acids and derivatives Cinnamic acids and derivatives Cinnamic acids and derivatives Cinnamic acids and derivatives Benzene and substituted derivatives	C00166 C12621 C00811 C01772 C06738	Phenylalanine and Tyrosine Metabolism NA NA NA NA NA	Phenylalanine and Tyrosine Metabolism	1.67589	1.27916	1.09593	0.760777	2.65543e-11	6.03864e-11	3.13474e-13	1.57348e-13	FALSE
165.066	positive	0.0377914	C8H8N2O2	CHN2O2_pos	6	benzoylurea isophthalamide	HMDB0249059 HMDB0253671	Benzene and substituted derivatives Benzene and substituted derivatives		NA NA		0.973461	1.09548	1.59446	1.70624	3.69853e-07	1.41315e-07	1.10857e-11	3.04374e-12	TRUE
165.07	positive	0.0207238	C13H8	CH_pos	10							0.673174	0.640277	0.968129	0.602288	1.19033e-06	3.97918e-07	0.00159884	9.82078e-05	FALSE
165.076	positive	0.490039	C6H12O5	CHO5_pos	1	α-L-fucose 1,5-anhydroglucitol (2R,3S,4S,5R)-2-(hydroxymethyl)-5-methyloxolane-2,3,4-triol L(+)-rhamnose 2,4,5,6-tetrahydroxyhexanal 1,2,4,5-tetrahydroxyhexan-3-one hex-5-ene-1,2,3,4,6-pentol 2-(hydroxymethyl)oxane-3,4,5-triol 2,5-bis(hydroxymethyl)oxolane-3,4-diol 6-methyloxane-2,3,4,5-tetrol 2,3-dihydroxypropyl 2-hydroxypropanoate 2-(1,2-dihydroxyethyl)oxolane-3,4-diol	HMDB0000174 HMDB0002712 HMDB0010207 HMDB0242511 HMDB0242540 HMDB0242766 HMDB0243560 HMDB0244228 HMDB0245489 HMDB0247051 HMDB0252842 HMDB0258390	Organooxygen compounds Organooxygen compounds Organooxygen compounds Organooxygen compounds Fatty Acyls Fatty Acyls Fatty Acyls Organooxygen compounds Organooxygen compounds Organooxygen compounds Glycerolipids Tetrahydrofurans	C01019 C07326 C00861	Fructose and mannose metabolism NA NA NA NA NA NA NA NA NA NA NA	Fructose and mannose metabolism	0.779303	0.914145	1.17485	1.26378	0.00602504	0.000901563	9.88053e-07	9.16743e-08	FALSE
165.088	positive	0.0572888	C6H8N6	CHN6_pos	6							0.728863	0.80118	-0.0350395	0.492056	0.876339	0.090929	0.163901	0.00846535	FALSE
165.091	positive	0.0255967	C10H12O2	CHO2_pos	5	eugenol 1-(4-methoxyphenyl)prop-2-en-1-ol carbofuran phenol 2-methoxy-4-propenylphenol	HMDB0005809 HMDB0244262 HMDB0244708 HMDB0249885	Phenols Phenol ethers Coumarans Phenols	C10453	NA NA NA NA		0.328695	0.167399	0.29867	0.0882249	0.0221085	0.00297124	0.196373	0.0100653	FALSE
165.094	positive											0.552111	1.3834	1.31951	-1.29345	0.00372675	0.000574399	0.00215545	0.000130773	FALSE
165.095	positive	-0.784946	[13C]C5H13NO4	[13C]CHNO4_pos	1							0.686565	0.941285	1.08569	1.29905	0.0569625	0.00716507	8.82591e-06	7.1065e-07	FALSE
165.102	positive	-0.117005	C9H12N2O	CHN2O_pos	5	4-(pyridin-4-yl)morpholine 3-(azetidin-2-ylmethoxy)pyridine phenylalanine amide	HMDB0246525 HMDB0247721 HMDB0253026	Organonitrogen compounds Organooxygen compounds Carboxylic acids and derivatives		NA NA NA		1.39103	0.665648	2.388	0.840827	7.80274e-05	1.70056e-05	0.000780983	4.9398e-05	FALSE
165.112	positive	-0.0304683	C7H16O4	CHO4_pos	0	propane, 1,1,3,3-tetramethoxy- 1,1,1,2-tetramethoxypropane	HMDB0244048 HMDB0258866	Organooxygen compounds Organooxygen compounds		NA NA		1.07237	0.924973	1.31263	0.732383	6.09254e-06	1.72996e-06	0.000131158	9.0852e-06	FALSE
165.116	positive											0.525833	1.09513	0.245038	-1.3354	0.75285	0.0792899	8.53141e-06	6.88309e-07	FALSE
165.118	positive											0.797458	1.0162	-0.329598	-0.950588	0.49076	0.0532776	0.000733291	4.65271e-05	FALSE
165.127	positive	-0.00731172	C11H16O	CHO_pos	4	α-butylbenzyl alcohol 2-isopropyl-4,5-dimethylphenol 2-{6,6-dimethylbicyclo[3.1.1]hept-2-en-2-yl}acetaldehyde 4-(2-methylphenyl)butan-1-ol tert-amylphenol 3-butyl-4-methylphenol	HMDB0243992 HMDB0245183 HMDB0246132 HMDB0246286 HMDB0246582 HMDB0249476	Benzene and substituted derivatives Prenol lipids Prenol lipids Benzene and substituted derivatives Benzene and substituted derivatives Phenols	C14226	NA NA NA NA NA NA		0.941081	0.744851	0.475812	0.293427	8.67571e-06	2.35758e-06	4.3151e-05	3.1673e-06	FALSE
165.139	positive	0.0329005	C10H16N2	CHN2_pos	4	wurster's blue N,N-diethyl-1,4-benzenediamine	HMDB0244279 HMDB0247663	Organonitrogen compounds Organonitrogen compounds		NA NA		1.076	1.1568	0.332995	0.891339	0.460597	0.0502238	3.12216e-12	1.03975e-12	FALSE
165.147	positive	0.119411	[13C]C10H17N	[13C]CHN_pos	4							0.8857	0.891394	1.28445	0.712417	0.0101338	0.00145346	0.0109045	0.000617687	FALSE
165.164	positive	0.0207119	C12H20	CH_pos	3							0.798242	0.825132	0.466936	0.321054	5.30671e-05	1.19629e-05	8.30318e-06	6.71908e-07	FALSE
165.974	positive											0.926411	1.32819	2.65527	1.22818	0.0016455	0.000271366	7.25241e-07	6.87367e-08	FALSE
165.992	positive											1.38499	0.802782	1.22532	1.05282	5.87685e-11	9.92534e-11	4.96979e-16	1.77189e-15	FALSE
166.05	positive	0.00363543	C8H7NO3	CHNO3_pos	6	6-methoxy-3H-1,3-benzoxazol-2-one HBOA PNAP 2-(C-hydroxycarbonimidoyl)benzoic acid	HMDB0036582 HMDB0038318 HMDB0256052 HMDB0256499	Benzoxazoles Benzoxazines Organooxygen compounds Benzene and substituted derivatives	C15769 C02803	NA NA NA NA		1.60585	1.08909	1.70589	1.29973	1.32863e-09	1.14431e-09	6.13463e-14	4.52063e-14	FALSE
166.058	positive	0.029082	[13C]C8H8O3	[13C]CHO3_pos	6							0.730709	0.509662	1.08641	0.538889	0.00446852	0.000681035	0.00299269	0.000178751	FALSE
166.071	positive	0.674891	C5H11NO5	CHNO5_pos	1							1.00351	1.33697	1.70186	1.87418	1.14288e-06	3.83292e-07	5.81205e-12	1.76356e-12	TRUE
166.075	positive											0.254256	0.197493	0.0951284	-0.116956	0.854724	0.0889175	0.611197	0.0300506	FALSE
166.086	positive	-0.029077	C9H11NO2	CHNO2_pos	5	L-phenylalanine 4-isopropylnitrobenzene 3,5-dimethylphenylcarbamic acid tyrosinal etamide 4-(dimethylamino)benzoic acid P-ethoxybenzamide phenyl 2-aminopropanoate phenylalanin tricaine N-(4-methoxyphenyl)ethanimidic acid 2-(phenylamino)propanoic acid	HMDB0000159 HMDB0243912 HMDB0244732 HMDB0244978 HMDB0245110 HMDB0246304 HMDB0246418 HMDB0250790 HMDB0250791 HMDB0252029 HMDB0255013 HMDB0256428	Carboxylic acids and derivatives Benzene and substituted derivatives Benzene and substituted derivatives Benzene and substituted derivatives Benzene and substituted derivatives Benzene and substituted derivatives Benzene and substituted derivatives Carboxylic acids and derivatives Carboxylic acids and derivatives Benzene and substituted derivatives Benzene and substituted derivatives Carboxylic a…	C00079 C02057 C18090	Phenylalanine and Tyrosine Metabolism NA NA NA NA NA NA NA NA NA NA NA	Phenylalanine and Tyrosine Metabolism	1.24264	1.13975	1.15141	0.681777	3.86779e-12	1.87421e-11	1.05915e-10	2.20414e-11	FALSE
166.094	positive	-0.00363445	[13C]C9H12O2	[13C]CHO2_pos	5							0.28617	0.41511	0.00634208	0.0241709	0.966847	0.0994444	0.745398	0.0363101	FALSE
166.099	positive											0.272436	1.58696	0.043029	-0.699417	0.873125	0.0906499	0.00327172	0.000194746	FALSE
166.107	positive	-0.0242277	C6H15NO4	CHNO4_pos	0							1.16479	0.898398	1.3361	1.89831	2.63437e-09	1.97383e-09	2.44148e-09	3.6225e-10	FALSE
166.123	positive	-0.00121127	C10H15NO	CHNO_pos	4	pseudoephedrine ephedrine pholedrine sulfate 2-methoxyamphetamine 3-[1-(dimethylamino)ethyl]phenol P-methoxyamphetamine [2-(4-methoxyphenyl)ethyl](methyl)amine 5-(2-aminopropyl)-2-methylphenol pseudoephedrine, (-)- anatoxin-a 2-[2-(methylamino)propyl]phenol	HMDB0001943 HMDB0015451 HMDB0060767 HMDB0243782 HMDB0244319 HMDB0246494 HMDB0246647 HMDB0246715 HMDB0246924 HMDB0248385 HMDB0255849	Benzene and substituted derivatives Benzene and substituted derivatives Benzene and substituted derivatives Benzene and substituted derivatives Phenols Benzene and substituted derivatives Benzene and substituted derivatives Benzene and substituted derivatives Benzene and substituted derivatives Anatoxins Benzene and substituted derivatives	C02765 C01575 C10841	NA NA NA NA NA NA NA NA NA NA NA		1.02491	0.915904	0.521052	0.455631	7.48719e-05	1.6366e-05	4.27325e-09	6.03738e-10	FALSE
166.131	positive	-0.0363364	[13C]C10H16O	[13C]CHO_pos	4							0.880463	1.08239	-0.121135	0.0286796	0.434808	0.0476422	0.718748	0.0350683	FALSE
166.142	positive	0.06419	[13C]C9H16N2	[13C]CHN2_pos	4							1.30697	0.784619	1.09365	1.04919	0.000297265	5.70002e-05	1.93276e-08	2.42286e-09	FALSE
166.144	positive	0.00363336	C7H19NO3	CHNO3_pos	-1							0.996081	0.778859	0.63692	1.76778	0.0466898	0.00595526	2.03891e-08	2.53886e-09	FALSE
166.159	positive	0.0871925	C11H19N	CHN_pos	3							0.487144	0.574666	0.760474	0.566138	0.0800605	0.00984126	0.0184135	0.00102343	FALSE
166.167	positive	-0.00847664	[13C]C11H20	[13C]CH_pos	3							0.589024	0.923296	-0.152386	-0.093445	0.343527	0.0382385	0.314027	0.0158051	FALSE
166.975	positive											0.715626	1.32742	2.80472	1.6299	0.0293249	0.0038669	4.39263e-06	3.70034e-07	TRUE
166.977	positive											0.551544	0.296607	1.10114	0.180132	5.8373e-05	1.30738e-05	0.779828	0.0379035	FALSE
166.986	positive											0.749575	1.16907	1.09819	1.929	0.000192457	3.84387e-05	1.89519e-13	1.07354e-13	FALSE
167.004	positive											0.462412	0.587019	1.4739	0.997125	0.00971719	0.00139913	4.35143e-05	3.193e-06	FALSE
167.023	positive											0.485669	0.554869	2.09624	1.58583	0.031575	0.00414778	5.44223e-06	4.52322e-07	TRUE
167.024	positive											1.12695	0.850057	1.8836	2.28601	3.01408e-06	9.09114e-07	6.25128e-09	8.57223e-10	TRUE
167.029	positive											0.932583	0.737066	1.33843	1.47357	4.42257e-07	1.65325e-07	1.07509e-08	1.40891e-09	FALSE
167.031	positive											1.14708	1.12663	1.32535	1.48584	2.84958e-08	1.49089e-08	3.17541e-08	3.82249e-09	FALSE
167.034	positive	-0.0301157	C8H6O4	CHO4_pos	6	phthalic acid terephthalic acid	HMDB0002107 HMDB0002428	Benzene and substituted derivatives Benzene and substituted derivatives	C01606 C06337	NA NA		0.894336	1.0332	1.01011	0.866877	1.24475e-06	4.13711e-07	1.00881e-09	1.63161e-10	FALSE
167.049	positive	0.0529987	C12H6O	CHO_pos	10							0.592555	0.458694	1.01712	1.41921	1.30738e-05	3.3978e-06	1.69982e-05	1.31454e-06	FALSE
167.052	positive											1.08822	1.43611	0.967715	-0.328422	0.00329267	0.0005116	0.00158391	9.73398e-05	FALSE
167.055	positive	-0.0252939	C5H10O6	CHO6_pos	1							1.33916	1.36468	0.912425	0.801463	4.18416e-08	2.0622e-08	8.73342e-13	3.58265e-13	FALSE
167.057	positive											1.00653	0.633181	3.31475	1.73868	0.000244346	4.76818e-05	1.06741e-05	8.51267e-07	TRUE
167.068	positive	0.0289052	C5H6N6O	CHN6O_pos	6							0.516197	1.21409	0.656048	1.06519	0.000692221	0.000123464	5.73847e-09	7.90929e-10	FALSE
167.07	positive	-0.00240872	C9H10O3	CHO3_pos	5	3-hydroxyphenylpropionic acid (R)-phenyllactate 4-methoxyphenylacetic acid hydroxyphenyl propionic acid 1-(3,4-dihydroxyphenyl)propan-2-one ethylparaben melilotic acid 4-hydroxyhydratropate 4-methyl-3a,4,5,7a-tetrahydro-2-benzofuran-1,3-dione apocynin mthpa paeonol hexahydroindene-1,2,3-trione	HMDB0000375 HMDB0000748 HMDB0000779 HMDB0002072 HMDB0002199 HMDB0031132 HMDB0032573 HMDB0033752 HMDB0041683 HMDB0245936 HMDB0247918 HMDB0254937 HMDB0256081 HMDB0260012	Phenylpropanoic acids Phenylpropanoic acids Phenylpropanoic acids Phenol ethers Phenylpropanoic acids Benzene and substituted derivatives Benzene and substituted derivatives Phenylpropanoic acids Phenylpropanoic acids Isobenzofurans Organooxygen compounds Isobenzofurans Organooxygen compounds Organooxygen compounds	C11457 C05607 C01479 C01744 C01198 C03080 C11380 C10712	NA NA NA NA NA NA NA NA NA NA NA NA NA NA		1.73014	1.15972	1.01928	0.502648	3.95935e-10	4.24149e-10	7.59149e-10	1.25889e-10	FALSE
167.081	positive	-0.143309	C8H10N2O2	CHN2O2_pos	5	2-(3,4-dihydroxyphenyl)ethanimidamide N-hydroxyethylnicotinamide	HMDB0247540 HMDB0254988	Phenols Pyridines and derivatives		NA NA		0.845969	0.771408	1.25049	0.68235	0.00538268	0.000808944	1.0788e-05	8.59503e-07	FALSE
167.086	positive	-0.160165	C13H10	CH_pos	9	1H-cyclopenta[a]naphthalene fluorene	HMDB0244872 HMDB0252355	Naphthalenes Fluorenes	C07715	NA NA		1.05746	0.548403	0.82366	0.488531	0.00654169	0.000971582	9.67369e-08	1.05597e-08	FALSE
167.104	positive	1.92298	C6H10N6	CHN6_pos	5							0.975969	1.24183	-0.514074	0.321585	0.441894	0.0483064	0.0254862	0.00140048	FALSE
167.107	positive	0.0252861	C10H14O2	CHO2_pos	4	perillic acid 2-butylbenzene-1,4-diol 4-hydroxy-2,3,5,6-tetramethylcyclohexa-2,5-dien-1-one 4-tert-butylcatechol camphorquinone 2-methyl-5-(3-oxoprop-1-en-2-yl)cyclopentane-1-carbaldehyde tetramethylbenzene-1,4-diol	HMDB0004586 HMDB0245044 HMDB0245491 HMDB0246584 HMDB0249577 HMDB0251578 HMDB0251643	Prenol lipids Phenols Organooxygen compounds Benzene and substituted derivatives Prenol lipids Prenol lipids Phenols	C11924 C14515	NA NA NA NA NA NA NA		0.820286	0.886797	0.516066	0.292455	0.000115241	2.41713e-05	2.63019e-05	1.99271e-06	FALSE
167.109	positive											0.708536	1.78126	0.138831	-1.09544	0.856011	0.0890335	0.00114128	7.09834e-05	FALSE
167.111	positive	-1.07644	[13C]C5H15NO4	[13C]CHNO4_pos	0							1.51906	0.906944	-0.156343	1.44425	0.839644	0.0875419	2.20208e-05	1.68415e-06	FALSE
167.118	positive	0.00481607	C9H14N2O	CHN2O_pos	4							0.889297	0.432135	0.0895271	0.802956	0.865222	0.0899013	0.000134966	9.33564e-06	FALSE
167.126	positive	0.150495	[13C]C9H15NO	[13C]CHNO_pos	4							0.747712	0.878445	0.676543	0.0570929	0.101938	0.0123634	0.751687	0.0366017	FALSE
167.141	positive											0.762424	1.48609	1.17234	-0.820994	0.0458706	0.00586375	0.00110248	6.86938e-05	FALSE
167.143	positive	-0.00722301	C11H18O	CHO_pos	3							0.91165	0.708536	0.352757	0.166734	0.000632223	0.000113544	0.017875	0.00099441	FALSE
167.179	positive	0.0204607	C12H22	CH_pos	2	dicyclohexyl	HMDB0249190	Saturated hydrocarbons		NA		1.20625	0.246458	-0.740498	-0.0865419	0.000522251	9.53791e-05	0.43793	0.0217969	FALSE
167.958	positive											1.07086	1.03953	1.71336	1.86184	0.000657851	0.000117738	1.39307e-10	2.79585e-11	TRUE
167.972	positive											0.75798	1.06286	1.15393	1.72224	0.0550779	0.00694317	8.98858e-07	8.40094e-08	FALSE
168.008	positive	-0.0287424	C10HNO2	CHNO2_pos	11							1.27311	0.949745	1.50487	1.52993	5.44377e-07	1.9891e-07	2.13131e-13	1.17703e-13	TRUE
168.029	positive	0.574775	C7H5NO4	CHNO4_pos	6	quinolinic acid 2-nitrobenzoic acid 3-hydroxy-2-nitrobenzaldehyde P-nitrobenzoic acid 3,5-pyridinedicarboxylic acid	HMDB0000232 HMDB0245255 HMDB0245884 HMDB0246532 HMDB0256966	Pyridines and derivatives Benzene and substituted derivatives Benzene and substituted derivatives Benzene and substituted derivatives Pyridines and derivatives	C03722 C16234 C18625	Nicotinate and nicotinamide metabolism | Tryptophan metabolism NA NA NA NA	Nicotinate and nicotinamide metabolism | Tryptophan metabolism	0.91017	0.777403	1.64087	1.36031	0.0127997	0.00179851	4.23564e-06	3.57803e-07	FALSE
168.056	positive	-0.0215506	C10H5N3	CHN3_pos	10							1.33493	1.06835	0.959164	0.93761	9.88974e-08	4.34921e-08	3.79494e-10	6.81015e-11	FALSE
168.058	positive	0.00598619	[13C]C4H10O6	[13C]CHO6_pos	1							0.978694	0.734577	0.526211	0.865735	0.0626549	0.00783736	1.77125e-05	1.36803e-06	FALSE
168.066	positive	0.00359156	C8H9NO3	CHNO3_pos	5	pyridoxal 2-hydroxy-N-(2-hydroxyphenyl)acetamide 4-hydroxyphenylglycine glycin	HMDB0001545 HMDB0240370 HMDB0244973 HMDB0255011	Pyridines and derivatives Benzene and substituted derivatives Carboxylic acids and derivatives Carboxylic acids and derivatives	C00250	Valine, leucine and isoleucine degradation | Vitamin B6 Metabolism NA NA NA	Valine, leucine and isoleucine degradation | Vitamin B6 Metabolism	1.42674	1.03499	1.86931	0.814419	3.291e-09	2.36992e-09	4.68556e-10	8.21979e-11	FALSE
168.074	positive	0.0287311	[13C]C8H10O3	[13C]CHO3_pos	5							0.907045	0.495158	1.16408	0.494639	5.30345e-05	1.19608e-05	1.28115e-06	1.17121e-07	FALSE
168.077	positive	-0.256181	C7H9N3O2	CHN3O2_pos	5							0.349846	0.781929	1.1839	1.13115	0.0322036	0.0042218	0.000535616	3.45453e-05	FALSE
168.087	positive	0.00837925	C5H13NO5	CHNO5_pos	0							0.636947	1.39936	2.22963	1.7337	2.94499e-06	8.89309e-07	3.45136e-07	3.46195e-08	TRUE
168.102	positive	-0.0287262	C9H13NO2	CHNO2_pos	4	methoxytyramine phenylephrine synephrine 5-(2-aminoethyl)-2-methoxyphenol metaraminol ethinamate 4-[(1S,2R)-2-amino-1-hydroxypropyl]phenol α-methyldopamine 4-(2-amino-1-hydroxypropyl)phenol 1,2-diethyl-3-hydroxypyridin-4-one metaraminol azaspirodecanedione 2-(cyclohexa-1,3-dien-1-ylamino)propanoic acid ecgonidine 4-[2-(methoxyamino)ethyl]phenol 2-amino-3-(cyclohexa-1,4-dien-1-yl)propanoic acid m-…	HMDB0000022 HMDB0002182 HMDB0004826 HMDB0012162 HMDB0014748 HMDB0015165 HMDB0060592 HMDB0060807 HMDB0243504 HMDB0244071 HMDB0245769 HMDB0245995 HMDB0246272 HMDB0248435 HMDB0249968 HMDB0251507 HMDB0251522 HMDB0253925 HMDB0259535	Phenols Phenols Phenols Phenols Benzene and substituted derivatives Organooxygen compounds Benzene and substituted derivatives Benzene and substituted derivatives Benzene and substituted derivatives Pyridines and derivatives Benzene and substituted derivatives Azaspirodecane derivatives Carboxylic acids and derivatives Pyrrolidines Phenols Carboxylic acids and derivatives Phenols Benzene and subs…	C05587 C07441 C04548 C07146 C07832	Tyrosine metabolism NA NA NA NA NA NA NA NA NA NA NA NA NA NA NA NA NA NA	Tyrosine metabolism	1.21727	1.05123	1.06231	0.660881	4.67105e-09	3.16173e-09	2.63643e-09	3.89506e-10	FALSE
168.11	positive	-0.00359061	[13C]C9H14O2	[13C]CHO2_pos	4							0.772535	0.982169	0.432901	0.309117	0.000572046	0.000103453	1.26637e-05	9.98762e-07	FALSE
168.114	positive											0.480352	0.889428	0.16631	0.91514	0.516004	0.0558777	0.000421475	2.75351e-05	FALSE
168.123	positive	-0.0239355	C6H17NO4	CHNO4_pos	-1							0.99788	0.819731	1.61398	1.5621	6.97169e-10	6.68159e-10	1.4422e-09	2.24999e-10	TRUE
168.138	positive	-0.00119667	C10H17NO	CHNO_pos	3							1.21171	0.765102	0.658903	0.607951	0.000105374	2.23091e-05	3.45567e-06	2.95415e-07	FALSE
168.146	positive	0.0239322	[13C]C10H18O	[13C]CHO_pos	3							0.960049	0.867768	0.0377008	0.168222	0.776619	0.0815779	0.0204854	0.00113468	FALSE
168.926	positive											0.37129	1.00864	0.846326	1.55101	0.2059	0.0237819	2.7023e-07	2.75042e-08	FALSE
168.943	positive											1.58831	2.07721	1.86543	1.12078	1.07615e-07	4.68883e-08	2.50256e-16	1.21345e-15	FALSE
168.964	positive											1.11957	1.05882	3.26728	1.04238	0.000370612	6.96731e-05	8.81479e-05	6.2269e-06	FALSE
168.993	positive											0.91476	0.480597	1.47232	0.842966	1.4497e-05	3.72106e-06	1.77142e-07	1.85675e-08	FALSE
169.003	positive											0.563535	1.39646	1.11576	1.2117	0.00513727	0.000776112	5.43283e-08	6.25425e-09	FALSE
169.021	positive											0.970258	1.68458	1.44385	1.32352	0.000330011	6.28838e-05	4.4622e-11	1.03921e-11	FALSE
169.035	positive											1.52569	1.04702	0.982044	0.768888	5.84155e-05	1.3072e-05	4.98393e-10	8.66173e-11	FALSE
169.046	positive											0.931303	0.71925	1.05546	0.69329	0.045732	0.00584892	0.00213223	0.000129462	FALSE
169.048	positive	-0.0297547	[13C]C10H5NO	[13C]CHNO_pos	10							0.860957	1.51245	0.95673	1.25908	1.24477e-06	4.13453e-07	1.12473e-14	1.35663e-14	FALSE
169.05	positive	-0.0297544	C8H8O4	CHO4_pos	5	homogentisic acid vanillic acid MHMA 4-hydroxymandelic acid 3,4 dihydroxyphenylacetic acid 5-methoxysalicylic acid isovanillic acid 4,10-dioxatricyclo[5.2.1.0^{2,6}]decane-3,5-dione dehydroacetic acid 2,4,6-trihydroxyacetophenone 3,4-dihydroxyphenyl acetate dihydroxyphenylacetic acid	HMDB0000130 HMDB0000484 HMDB0000750 HMDB0000822 HMDB0001336 HMDB0001868 HMDB0060003 HMDB0245751 HMDB0250943 HMDB0257566 HMDB0258013 HMDB0258145	Benzene and substituted derivatives Benzene and substituted derivatives Phenols Phenols Phenols Benzene and substituted derivatives Benzene and substituted derivatives Furofurans Pyrans Organooxygen compounds Phenol esters Benzene and substituted derivatives	C00544 C06672 C11527 C01161	Phenylalanine and Tyrosine Metabolism | Tyrosine metabolism NA NA NA Tyrosine metabolism NA NA NA NA NA NA NA	Phenylalanine and Tyrosine Metabolism | Tyrosine metabolism | Tyrosine metabolism	1.30296	1.11301	1.08915	1.20256	5.05891e-10	5.15322e-10	2.39025e-11	5.92532e-12	FALSE
169.052	positive											1.10089	0.875954	0.616394	0.969582	0.00498637	0.000754854	9.9668e-11	2.08487e-11	FALSE
169.06	positive	-1.59711	C7H8N2O3	CHN2O3_pos	5	2,3-diamino-6-hydroxybenzoic acid 2-[methyl(nitroso)amino]benzene-1,4-diol	HMDB0013159 HMDB0251017	Benzene and substituted derivatives Phenols		NA NA		1.13081	1.01738	2.00295	1.43237	3.37083e-06	1.00502e-06	5.75628e-07	5.56444e-08	FALSE
169.068	positive											1.24716	1.59926	-0.344093	-0.782752	0.452189	0.0493693	7.64309e-05	5.4484e-06	FALSE
169.083	positive	0.0285585	C5H8N6O	CHN6O_pos	5	3-methyl-2-(triaz-1-en-1-yl)imidazole-4-carboxamide 5-(3-methyltriaz-2-en-1-yl)-3H-imidazole-4-carboxamide 2-(3-methyltriaz-2-en-1-yl)-3H-imidazole-4-carboxamide	HMDB0245922 HMDB0254938 HMDB0257597	Azoles Carboxylic acids and derivatives Carboxylic acids and derivatives	C16250	NA NA NA		0.433922	1.11901	0.164106	1.37923	0.776791	0.0815794	3.26956e-09	4.74089e-10	FALSE
169.086	positive	-0.00237984	C9H12O3	CHO3_pos	4	2,6-dimethoxy-4-methylphenol homovanillyl alcohol 5-methyl-hexahydro-2-benzofuran-1,3-dione 2-methoxy-1-phenylethane-1,1-diol mhhpa	HMDB0029680 HMDB0038925 HMDB0244846 HMDB0254549 HMDB0254649	Phenols Phenols Isobenzofurans Benzene and substituted derivatives Isobenzofurans		NA NA NA NA NA		1.5736	1.07446	0.894761	0.505632	2.30044e-09	1.77493e-09	2.04014e-10	3.93488e-11	FALSE
169.097	positive	0.036885	C8H12N2O2	CHN2O2_pos	4	pyridoxamine hexamethylene diisocyanate 4,5-dimethoxybenzene-1,2-diamine 1-(2-hydroxyethyl)-4,6-dimethylpyrimidin-2-one	HMDB0001431 HMDB0244241 HMDB0246610 HMDB0259943	Pyridines and derivatives Organonitrogen compounds Benzene and substituted derivatives Diazines	C00534	Vitamin B6 Metabolism NA NA NA	Vitamin B6 Metabolism	0.691746	1.12437	1.26803	1.42046	0.0507809	0.00644063	1.45001e-08	1.8473e-09	FALSE
169.101	positive	0.139208	C13H12	CH_pos	8	diphenylmethane	HMDB0251459	Benzene and substituted derivatives		NA		1.30465	0.472015	1.18038	0.508568	0.000168068	3.40396e-05	9.76483e-06	7.81578e-07	FALSE
169.113	positive											0.969374	1.05144	-0.677416	-0.195737	0.433585	0.0475484	0.53091	0.0262255	FALSE
169.12	positive	1.18611	C6H12N6	CHN6_pos	4	TriMM	HMDB0259246	Triazines		NA		1.12054	1.29434	-0.759507	-0.203479	0.170577	0.0199374	0.387742	0.0193824	FALSE
169.122	positive	0.0249829	C10H16O2	CHO2_pos	3	sebacil 3-(3-pentyloxiran-2-yl)prop-2-enal 4-(prop-1-en-2-yl)cyclohexane-1-carboxylic acid	HMDB0244060 HMDB0246611 HMDB0251324	Organooxygen compounds Organooxygen compounds Prenol lipids		NA NA NA		1.06144	0.926726	0.409626	0.269416	0.000226873	4.45909e-05	0.000311518	2.06408e-05	FALSE
169.125	positive											0.578873	1.36166	0.988954	-0.796559	0.149095	0.0176292	0.00616774	0.000358417	FALSE
169.126	positive	-0.766123	[13C]C5H17NO4	[13C]CHNO4_pos	-1							1.13669	0.863995	1.61632	1.06353	0.040311	0.00519533	0.000118159	8.22233e-06	FALSE
169.134	positive	0.123717	C9H16N2O	CHN2O_pos	3							0.911708	1.08676	1.84659	2.05687	1.7168e-05	4.33581e-06	6.20643e-06	5.11454e-07	TRUE
169.159	positive	-0.00713643	C11H20O	CHO_pos	2							0.935499	0.981043	0.355001	0.310993	0.00286954	0.000450446	1.13818e-05	9.02953e-07	FALSE
169.195	positive	0.0202155	C12H24	CH_pos	1							0.88259	0.756988	0.988073	0.369412	0.00993362	0.00142751	5.8476e-05	4.22186e-06	FALSE
169.925	positive											1.18481	1.05982	1.40586	1.70681	1.68746e-06	5.41081e-07	4.28245e-10	7.56738e-11	FALSE
169.945	positive											1.48529	1.84535	1.7382	1.66157	0.000127396	2.64955e-05	8.52294e-08	9.40944e-09	TRUE
170.004	positive											0.717668	1.44169	1.2918	1.09172	4.55275e-05	1.04173e-05	1.09288e-13	7.16107e-14	FALSE
170.034	positive											1.32141	0.253238	0.556767	0.626143	0.483467	0.0525408	0.0536728	0.00288334	FALSE
170.042	positive											0.722218	0.915293	1.44182	1.5112	1.66549e-05	4.21856e-06	4.5083e-06	3.79119e-07	FALSE
170.045	positive	-0.0236634	C7H7NO4	CHNO4_pos	5	furoylglycine 2,5-dihydroxy-1H-pyrrol-3-yl prop-2-enoate 2,5-dihydroxypyrrol-1-yl prop-2-enoate 2,5-dioxopyrrolidin-1-yl prop-2-enoate N,3,4-trihydroxybenzamide	HMDB0000439 HMDB0242487 HMDB0242492 HMDB0246241 HMDB0251226	Carboxylic acids and derivatives Pyrroles Pyrroles Pyrrolidines Benzene and substituted derivatives		NA NA NA NA NA		1.05201	0.78449	1.30822	1.30806	7.68049e-06	2.12273e-06	6.22433e-10	1.05527e-10	FALSE
170.053	positive	0.237806	[13C]C7H8O4	[13C]CHO4_pos	5							0.879571	0.892867	1.50648	1.89121	0.0245133	0.00327237	9.25258e-05	6.50961e-06	TRUE
170.06	positive	-0.178642	C11H7NO	CHNO_pos	9	naphthalene, 1-isocyanato-	HMDB0243960	Naphthalenes		NA		1.79145	0.378109	1.3814	0.103871	2.29401e-13	6.99658e-12	0.28309	0.0143224	FALSE
170.081	positive	0.00354874	C8H11NO3	CHNO3_pos	4	norepinephrine pyridoxine hydroxydopamine 5-hydroxydopamine	HMDB0000216 HMDB0000239 HMDB0001537 HMDB0004817	Phenols Pyridines and derivatives Phenols Phenols	C00547 C00314	Tyrosine metabolism | Tyrosine metabolism Vitamin B6 Metabolism NA NA	Tyrosine metabolism | Tyrosine metabolism | Vitamin B6 Metabolism	1.30931	1.22552	1.24241	1.17285	4.00777e-11	7.66784e-11	1.44263e-13	8.83213e-14	FALSE
170.089	positive	-0.0307543	[13C]C8H12O3	[13C]CHO3_pos	4							1.05033	1.03866	0.759732	0.379263	4.01377e-08	1.98958e-08	3.8654e-05	2.8545e-06	FALSE
170.096	positive	0.0260218	C12H11N	CHN_pos	8	3-phenylaniline	HMDB0245011 HMDB0245817	NA Benzene and substituted derivatives		NA NA		0.75654	1.35362	0.867267	0.646716	8.38118e-05	1.81518e-05	2.11618e-10	4.06215e-11	FALSE
170.102	positive	0.0674177	C5H15NO5	CHNO5_pos	-1							0.570567	1.05656	1.98468	1.68707	0.0193678	0.00263085	0.000218621	1.47517e-05	TRUE
170.118	positive	-0.0283838	C9H15NO2	CHNO2_pos	3							1.28921	1.00169	0.947531	0.593301	2.11306e-08	1.14963e-08	1.82677e-08	2.29951e-09	FALSE
170.126	positive	-0.00354781	[13C]C9H16O2	[13C]CHO2_pos	3							1.25881	0.986973	0.255733	0.294454	0.0274204	0.00363518	0.000108338	7.58245e-06	FALSE
170.154	positive	-0.00118241	C10H19NO	CHNO_pos	2							0.957196	1.35938	1.05208	1.34265	4.13914e-08	2.04196e-08	2.56676e-14	2.39342e-14	FALSE
170.162	positive	0.023647	[13C]C10H20O	[13C]CHO_pos	2							1.14039	0.448844	0.113399	0.0627085	0.353652	0.0392728	0.369107	0.0184776	FALSE
170.198	positive	0.0508301	[13C]C11H24	[13C]CH_pos	1							0.65265	0.811009	0.788244	0.46462	0.228556	0.0262003	0.00213273	0.00012946	FALSE
170.958	positive											0.376653	0.418614	2.25723	1.85121	0.0106168	0.00151602	0.000207488	1.40552e-05	TRUE
170.963	positive											0.91921	0.913064	1.14117	1.56745	2.19043e-05	5.39533e-06	2.32068e-10	4.40932e-11	FALSE
170.975	positive											0.735716	0.802583	1.86041	1.41583	0.0161842	0.00222404	5.74919e-10	9.86442e-11	FALSE
170.988	positive											0.504983	0.140392	1.34921	0.355272	0.0104643	0.0014959	0.00586518	0.000341572	FALSE
170.997	positive											0.713159	0.746847	2.00608	1.29945	0.0201311	0.00272525	0.0116618	0.000659198	FALSE
171.014	positive											1.17422	0.524862	-0.761631	0.585237	0.440988	0.0482277	0.00775112	0.000444885	FALSE
171.025	positive											1.70093	1.27374	1.19541	0.941943	1.74849e-08	9.66493e-09	2.60813e-10	4.89791e-11	FALSE
171.026	positive											1.09612	0.731318	1.02103	1.41355	1.99499e-06	6.28038e-07	0.00312213	0.000186162	FALSE
171.029	positive	-0.232912	C7H6O5	CHO5_pos	5	galop	HMDB0005807	Benzene and substituted derivatives	C01424	NA		1.11979	1.09693	1.51943	1.35936	0.000862905	0.000150237	2.77377e-10	5.16495e-11	FALSE
171.063	positive											0.67757	0.929124	0.714239	1.03705	0.0160796	0.00221085	0.000283773	1.89058e-05	FALSE
171.065	positive	-0.0294017	C8H10O4	CHO4_pos	4	3,4-dihydroxyphenylglycol 1-phenylethane-1,2,2,2-tetrol 2-(prop-2-enoyloxy)ethyl prop-2-enoate penicillic acid	HMDB0000318 HMDB0251347 HMDB0252068 HMDB0256217	Phenols Benzene and substituted derivatives Carboxylic acids and derivatives Keto acids and derivatives	C05576	Tyrosine metabolism NA NA NA	Tyrosine metabolism	1.56086	1.21828	1.19925	0.992019	8.13466e-11	1.24417e-10	8.91802e-15	1.1562e-14	FALSE
171.076	positive	-0.460989	C7H10N2O3	CHN2O3_pos	4							1.0578	1.13939	1.36067	1.61273	0.000138629	2.86023e-05	5.51312e-08	6.33764e-09	FALSE
171.08	positive	-1.12422	C12H10O	CHO_pos	8							0.444448	0.411051	0.718745	0.473502	0.00686352	0.00101705	0.000181781	1.23796e-05	FALSE
171.099	positive	0.0282201	C5H10N6O	CHN6O_pos	4	{N-[(1-oxopropan-2-ylidene)amino]carbamimidamido}methanimidamide	HMDB0258082	Organonitrogen compounds		NA		0.207042	0.89168	-0.0441018	1.54265	0.954829	0.0983254	5.22015e-05	3.7994e-06	FALSE
171.102	positive	-0.00235164	C9H14O3	CHO3_pos	3							1.17005	0.715492	0.607993	0.160413	1.57519e-07	6.60774e-08	0.0167373	0.000933263	FALSE
171.113	positive	-0.0223391	C8H14N2O2	CHN2O2_pos	3	levitiracetam etiracetam N-<2-cyano-ethyl>-valine	HMDB0015333 HMDB0252105 HMDB0254985	Carboxylic acids and derivatives Carboxylic acids and derivatives Carboxylic acids and derivatives	C07841	NA NA NA		0.953604	1.06406	1.49303	1.87243	6.15212e-06	1.74306e-06	1.5353e-06	1.38733e-07	FALSE
171.117	positive	0.0199871	C13H14	CH_pos	7							0.437825	1.11165	0.549189	0.502497	0.00257942	0.000409117	2.84566e-09	4.17871e-10	FALSE
171.121	positive	-0.115217	[13C]C8H15NO2	[13C]CHNO2_pos	3							1.41238	1.07109	-0.197173	0.566729	0.701022	0.0741477	0.0716178	0.00380854	FALSE
171.129	positive											1.41276	1.84942	-0.399975	-0.96196	0.387035	0.0427692	0.000529611	3.41761e-05	FALSE
171.135	positive	0.407928	C6H14N6	CHN6_pos	3							0.784386	1.19021	1.19755	0.00758849	0.0549832	0.00693461	0.970761	0.0466045	FALSE
171.138	positive	0.0246869	C10H18O2	CHO2_pos	2	4-decenoic acid 3-(3-ethylcyclopentyl)propanoic acid cyclooctyl acetate limonene-1,2-diol trans-p-menth-6-ene-2,8-diol	HMDB0246405 HMDB0248059 HMDB0250662 HMDB0256048 HMDB0258357	Fatty Acyls Carboxylic acids and derivatives Carboxylic acids and derivatives Prenol lipids Prenol lipids	C18020	NA NA NA NA NA		1.04653	1.40498	0.627709	0.542045	1.50551e-05	3.85286e-06	2.35782e-10	4.47288e-11	FALSE
171.141	positive											0.872634	1.33636	0.190862	-0.0674981	0.709773	0.0749816	0.745067	0.0363013	FALSE
171.149	positive	-0.0540725	C9H18N2O	CHN2O_pos	2	2-amino-3-methyl-1-(pyrrolidin-1-yl)butan-1-one	HMDB0246938	Carboxylic acids and derivatives		NA		0.907784	0.842035	1.31215	1.10835	5.88914e-12	2.33088e-11	2.19296e-12	7.77288e-13	FALSE
171.157	positive	0.0881575	[13C]C9H19NO	[13C]CHNO_pos	2							1.38368	1.00261	1.94826	1.83228	5.78132e-06	1.65154e-06	1.74082e-09	2.65438e-10	TRUE
171.174	positive	-0.00705189	C11H22O	CHO_pos	1	2,8-dimethylnonan-5-one	HMDB0245526	Organooxygen compounds		NA		0.742164	0.786686	0.038461	0.322337	0.740699	0.0780895	4.91583e-05	3.5876e-06	FALSE
171.963	positive											0.515954	0.8242	1.53008	1.74933	0.0580387	0.00728277	0.00115763	7.19632e-05	TRUE
171.98	positive											0.892374	1.31012	2.12525	1.39215	7.75771e-08	3.54386e-08	1.24795e-13	7.87904e-14	FALSE
172.028	positive											0.694882	1.24199	1.65695	1.50975	0.0991977	0.0120452	2.94815e-05	2.21423e-06	FALSE
172.043	positive											1.08054	0.526004	2.07865	0.687656	0.000635681	0.000114046	0.00161364	9.90413e-05	FALSE
172.06	positive	-0.0233845	C7H9NO4	CHNO4_pos	4							1.14035	1.06104	1.63533	1.41635	1.21987e-08	7.09866e-09	9.55744e-16	3.04884e-15	FALSE
172.069	positive	0.118086	[13C]C7H10O4	[13C]CHO4_pos	4							1.08058	0.936615	1.75924	1.29415	1.36582e-09	1.17051e-09	2.2961e-05	1.75274e-06	FALSE
172.076	positive	-0.351906	C11H9NO	CHNO_pos	8	1-naphthalenecarboxamide 2naphthylamide N-(azulen-1-ylmethylidene)hydroxylamine	HMDB0243957 HMDB0245248 HMDB0248823	Naphthalenes Naphthalenes Unsaturated hydrocarbons		NA NA NA		0.762264	0.632412	1.33206	0.353529	0.00205063	0.00033143	0.0546662	0.00293476	FALSE
172.097	positive	0.00350694	C8H13NO3	CHNO3_pos	3	Hsl lepton	HMDB0247190 HMDB0251235	Carboxylic acids and derivatives Oxazinanes		NA NA		1.1861	1.15171	1.15902	1.22039	1.42045e-10	1.86926e-10	1.6006e-14	1.70948e-14	FALSE
172.105	positive	0.0280542	[13C]C8H14O3	[13C]CHO3_pos	3							1.33769	1.42376	0.447293	-0.147402	4.7505e-05	1.08267e-05	0.135693	0.00705958	FALSE
172.112	positive	-0.149616	C12H13N	CHN_pos	7	rasagiline 1-methyl-4-phenyl-2H-pyridine rasagiline 1-(naphthalen-1-yl)ethanamine	HMDB0015454 HMDB0243930 HMDB0244818 HMDB0246668	Indanes Pyridines and derivatives Indanes Naphthalenes		NA NA NA NA		0.22248	0.444468	0.431501	0.658781	0.0307494	0.00404342	9.2286e-10	1.5087e-10	FALSE
172.12	positive	0.1087	[13C]C12H14	[13C]CH_pos	7							0.687557	0.256498	0.82035	0.253911	0.0308292	0.00405186	0.0058869	0.000342754	FALSE
172.133	positive	-0.0280495	C9H17NO2	CHNO2_pos	2	gabapentin 1-hydroxy-2,2,6,6-tetramethylpiperidin-4-one cyclohexylalanine	HMDB0005015 HMDB0243896 HMDB0244979	Carboxylic acids and derivatives Piperidines Carboxylic acids and derivatives		NA NA NA		1.25554	1.02435	0.910617	0.881654	3.50327e-08	1.76179e-08	1.62706e-10	3.20966e-11	FALSE
172.141	positive	-0.00350602	[13C]C9H18O2	[13C]CHO2_pos	2							1.16237	1.35941	0.548613	0.538663	3.24571e-05	7.6773e-06	2.77051e-09	4.0832e-10	FALSE
172.153	positive	0.0350579	[13C]C8H18N2O	[13C]CHN2O_pos	2							0.507842	1.06473	1.42969	1.33092	0.00182114	0.000297305	2.91153e-09	4.26768e-10	FALSE
172.17	positive	-0.00116848	C10H21NO	CHNO_pos	1	2-amino-1-cyclooctylethanol	HMDB0245091	Organonitrogen compounds		NA		1.24177	0.739299	0.965713	0.79204	4.49126e-10	4.65734e-10	8.00608e-12	2.30523e-12	FALSE
172.178	positive	-0.0350528	[13C]C10H22O	[13C]CHO_pos	1							1.01903	0.0760192	-0.660604	-0.022916	0.00118224	0.000200911	0.88095	0.0425117	FALSE
172.922	positive											0.604924	1.00812	1.45536	1.54564	8.31989e-06	2.274e-06	4.28851e-11	1.0065e-11	FALSE
172.935	positive											1.39249	1.62056	1.52674	1.74408	9.55273e-07	3.26499e-07	8.25526e-08	9.13472e-09	TRUE
172.964	positive											0.688208	0.816187	1.11801	1.28418	0.114017	0.013713	2.18295e-10	4.1804e-11	FALSE
172.973	positive											0.822255	1.30838	1.20595	1.50458	8.89145e-06	2.40737e-06	3.16126e-09	4.61144e-10	FALSE
172.996	positive											0.760454	0.90795	0.692864	1.87896	0.36958	0.0409451	2.70223e-06	2.34647e-07	FALSE
173.006	positive											0.385806	1.17721	1.12907	1.20222	0.366584	0.0406305	0.000769293	4.86713e-05	FALSE
173.012	positive											0.573846	0.614004	0.353198	0.758722	0.51968	0.056264	5.78064e-05	4.17849e-06	FALSE
173.022	positive											0.911341	1.05957	2.09832	1.13791	0.0235241	0.00314761	6.92039e-12	2.04111e-12	FALSE
173.042	positive											0.518834	0.931879	0.414845	1.22876	0.526723	0.0569552	0.000648009	4.13868e-05	FALSE
173.044	positive	0.00232508	C7H8O5	CHO5_pos	4							0.925712	0.892166	1.64508	1.28957	1.09325e-05	2.90389e-06	2.08457e-10	4.01419e-11	FALSE
173.049	positive											0.636511	0.754913	2.25465	1.64063	0.0199407	0.00270372	6.59686e-05	4.73322e-06	TRUE
173.056	positive	0.215056	C6H8N2O4	CHN2O4_pos	4							1.18462	1.1022	1.87251	1.5121	0.000137187	2.83386e-05	1.15971e-06	1.06744e-07	TRUE
173.06	positive	0.198777	C11H8O2	CHO2_pos	8	menadione 2-hydroxynaphthalene-1-carbaldehyde β-naphthoic acid	HMDB0001892 HMDB0245141 HMDB0245249	Naphthalenes Naphthalenes Naphthalenes	C05377 C14101	NA NA NA		1.39323	0.673332	1.06061	0.696298	0.000743603	0.000131722	1.39869e-06	1.27004e-07	FALSE
173.079	positive											0.501466	0.592777	1.01667	0.767153	3.70498e-08	1.85067e-08	0.000178376	1.21579e-05	FALSE
173.081	positive	0.0290573	C8H12O4	CHO4_pos	3	cis-4-octenedioic acid cyclohexane-1,2-dicarboxylic acid 1,4-diethyl but-2-enedioate diethylbut-2-enedioic acid	HMDB0004982 HMDB0250649 HMDB0251249 HMDB0255396	Fatty Acyls Carboxylic acids and derivatives Fatty Acyls Fatty Acyls		NA NA NA NA		1.36393	1.34719	0.979741	0.75254	2.89311e-08	1.5091e-08	3.0323e-12	1.02389e-12	FALSE
173.086	positive											0.576627	0.96737	2.69707	0.703492	0.0319373	0.00419218	0.181503	0.00931693	FALSE
173.092	positive	0.474185	C7H12N2O3	CHN2O3_pos	3	glycylproline Pro-Gly gly-pro	HMDB0000721 HMDB0011178 HMDB0252876	Carboxylic acids and derivatives Carboxylic acids and derivatives Carboxylic acids and derivatives		NA NA NA		1.0302	0.728205	1.14576	0.758144	7.9026e-07	2.77979e-07	2.1827e-06	1.92568e-07	FALSE
173.094	positive											0.542029	0.588462	-1.30445	1.1203	0.0346854	0.00452314	0.00396637	0.000234483	FALSE
173.096	positive	-0.00697314	C12H12O	CHO_pos	7							0.571462	0.275382	0.339834	0.183441	0.0618445	0.00773972	0.00251327	0.000151159	FALSE
173.1	positive	-1.18657	[13C]C7H13NO3	[13C]CHNO3_pos	3							0.866962	0.453237	1.14631	0.046649	0.00991167	0.00142475	0.81953	0.0397297	FALSE
173.117	positive	-0.0023241	C9H16O3	CHO3_pos	2							1.17043	1.46138	0.97857	0.664332	4.89273e-11	8.77795e-11	2.57573e-12	8.88284e-13	FALSE
173.128	positive	-0.196373	C8H16N2O2	CHN2O2_pos	2							1.00133	0.933453	1.70563	1.41332	1.3637e-07	5.80511e-08	0.000102021	7.15683e-06	FALSE
173.132	positive	0.0197531	C13H16	CH_pos	6							0.753777	1.60529	0.717186	0.530895	1.56411e-07	6.56657e-08	4.42901e-10	7.79794e-11	FALSE
173.136	positive											1.25068	0.545861	-2.58118	-1.25972	0.000406413	7.58533e-05	0.000720635	4.57601e-05	FALSE
173.154	positive	0.0243978	C10H20O2	CHO2_pos	1	capric acid	HMDB0000511	Fatty Acyls	C01571	Biosynthesis of unsaturated fatty acids	Biosynthesis of unsaturated fatty acids	0.679285	0.613963	0.561539	0.344512	0.000327948	6.25137e-05	5.8272e-05	4.20964e-06	FALSE
173.165	positive	0.12082	C9H20N2O	CHN2O_pos	1	4-amino-2,2,6,6-tetramethylpiperidin-1-ol	HMDB0246342	Piperidines		NA		1.06808	0.464069	0.90827	1.0963	1.68967e-08	9.37983e-09	0.00205842	0.0001252	FALSE
173.173	positive	-0.0290418	[13C]C9H21NO	[13C]CHNO_pos	1							0.744599	0.425312	0.778614	0.944827	0.00163855	0.000270563	2.58128e-07	2.63943e-08	FALSE
173.971	positive											0.682821	1.44227	1.43243	1.63051	6.25614e-05	1.38859e-05	4.25564e-10	7.54198e-11	FALSE
173.975	positive											0.847463	1.77102	1.60542	1.15049	8.85053e-05	1.90727e-05	3.48882e-15	6.40784e-15	FALSE
173.981	positive											0.77583	0.94491	2.20521	1.32288	0.034073	0.00444887	1.72608e-06	1.54875e-07	FALSE
174.001	positive											0.549633	0.797702	0.894065	1.687	0.145528	0.0172626	8.81447e-08	9.67841e-09	FALSE
174.04	positive	-0.22308	C6H7NO5	CHNO5_pos	4							1.35126	0.834311	2.35309	1.22902	0.000151216	3.09775e-05	0.0019573	0.000119229	FALSE
174.076	positive	0.0346683	C7H11NO4	CHNO4_pos	3	ACPD 1-acetyl-4-hydroxypyrrolidine-2-carboxylic acid	HMDB0242328 HMDB0253913	Carboxylic acids and derivatives Carboxylic acids and derivatives		NA NA		1.13659	1.05031	1.57424	1.47242	2.76047e-10	3.19481e-10	3.73371e-14	3.1214e-14	FALSE
174.084	positive	0.00115556	[13C]C7H12O4	[13C]CHO4_pos	3							0.819375	1.07195	0.847287	0.78887	2.15172e-05	5.31766e-06	8.21843e-05	5.83623e-06	FALSE
174.091	positive	0.0566199	C11H11NO	CHNO_pos	7	4-methoxynaphthalen-2-amine	HMDB0246491	Naphthalenes		NA		0.867201	0.351766	1.25848	0.476692	0.000154973	3.16969e-05	3.57171e-05	2.64892e-06	FALSE
174.099	positive	0.0231091	[13C]C11H12O	[13C]CHO_pos	7							0.761223	0.427794	0.737431	0.201238	0.00700684	0.00103681	0.000590197	3.7864e-05	FALSE
174.112	positive	0.0034661	C8H15NO3	CHNO3_pos	2	hexanoylglycine zinc acexamate octahydroindolizine-1,2,8-triol	HMDB0000701 HMDB0247031 HMDB0247470	Carboxylic acids and derivatives Fatty Acyls Indolizidines		NA NA NA		1.17896	0.92402	1.12456	1.13716	8.09038e-11	1.24106e-10	4.76356e-10	8.35058e-11	FALSE
174.121	positive	0.0854931	[13C]C8H16O3	[13C]CHO3_pos	2							1.40539	1.02899	0.830969	0.611589	6.57105e-06	1.85164e-06	3.91665e-06	3.32711e-07	FALSE
174.128	positive	-0.0323474	C12H15N	CHN_pos	6	MPTP 1-(4-methylphenyl)-3-azabicyclo[3.1.0]hexane (1-phenylpropan-2-yl)(prop-2-yn-1-yl)amine	HMDB0243929 HMDB0249183 HMDB0251060	Pyridines and derivatives Piperidines Benzene and substituted derivatives	C04599	NA NA NA		0.386075	0.474495	0.161988	0.294286	0.452578	0.0494014	0.00708782	0.000408944	FALSE
174.136	positive	-0.00808648	[13C]C12H16	[13C]CH_pos	6							0.596489	0.300272	0.793006	0.216387	0.0104509	0.00149439	0.00476101	0.000279348	FALSE
174.149	positive	0.0300332	C9H19NO2	CHNO2_pos	1	tempol	HMDB0243489	Piperidines		NA		1.32107	0.658421	0.858138	0.774217	7.03368e-08	3.25324e-08	4.39025e-08	5.13448e-09	FALSE
174.157	positive	-0.0612187	[13C]C9H20O2	[13C]CHO2_pos	1							0.631706	0.278198	0.308175	-0.152578	0.14591	0.0173	0.275835	0.0139757	FALSE
174.185	positive	-0.00115488	C10H23NO	CHNO_pos	0							0.979462	0.748315	0.884998	1.4413	2.13857e-05	5.29524e-06	1.77941e-07	1.86351e-08	FALSE
174.955	positive											1.53678	1.2217	2.01797	0.991956	3.56351e-05	8.3415e-06	3.00561e-10	5.55823e-11	FALSE
174.959	positive											1.05391	1.36638	1.53895	1.1044	0.000104275	2.21036e-05	8.34824e-15	1.08815e-14	FALSE
174.979	positive											0.554153	0.885739	0.937823	1.53831	0.212234	0.0244427	0.000253127	1.6962e-05	FALSE
174.985	positive											1.26628	0.829193	1.05762	0.938245	6.06515e-07	2.18991e-07	8.09909e-09	1.08664e-09	FALSE
174.989	positive											1.05353	0.763634	1.32202	1.55354	4.14666e-07	1.56363e-07	9.29344e-12	2.6199e-12	FALSE
174.991	positive											0.699726	1.36086	1.43682	1.75763	8.2582e-05	1.79229e-05	4.74783e-12	1.47953e-12	FALSE
175	positive											0.531325	1.19533	0.900378	1.71992	0.21049	0.0242526	1.22615e-05	9.69255e-07	FALSE
175.018	positive	1.7746	C13H2O	CHO_pos	13							0.835656	0.824297	1.08953	1.5057	2.67539e-07	1.06296e-07	0.000115376	8.03561e-06	FALSE
175.028	positive											0.550871	0.79485	0.916764	1.70248	0.00228237	0.000365694	4.86229e-06	4.06911e-07	FALSE
175.039	positive	-0.11722	C10H6O3	CHO3_pos	8	2-hydroxy-1,4-naphthoquinone 3H-naphthalene-1,2,4-trione	HMDB0253997 HMDB0257698	Naphthalenes Naphthalenes		NA NA		0.662827	0.907627	1.25088	1.31453	0.0399806	0.00515659	6.07928e-06	5.01999e-07	FALSE
175.045	positive											0.918157	0.424531	0.511606	0.422567	0.322675	0.0361503	0.137307	0.00714049	FALSE
175.052	positive											2.12788	1.30685	-3.30041	-1.70658	2.37342e-05	5.78556e-06	0.000138076	9.53986e-06	TRUE
175.058	positive											0.554891	0.647562	2.11953	1.01445	0.0260904	0.00347306	0.128745	0.00671108	FALSE
175.06	positive	0.059752	C7H10O5	CHO5_pos	3	(-)-shikimate	HMDB0003070	Organooxygen compounds	C00493	NA		1.17246	0.900441	1.66985	1.2458	2.12199e-09	1.65947e-09	1.34707e-12	5.13498e-13	FALSE
175.071	positive	0.270016	C6H10N2O4	CHN2O4_pos	3	4-aminopyrrolidine-2,4-dicarboxylic acid diethyl azodicarboxylate formiminoglutamic acid	HMDB0242605 HMDB0251237 HMDB0255140	Carboxylic acids and derivatives Organic carbonic acids and derivatives Carboxylic acids and derivatives		NA NA NA		1.13423	1.04397	2.92847	1.17298	1.18707e-05	3.1211e-06	5.75119e-05	4.15968e-06	FALSE
175.075	positive	-0.0333203	C11H10O2	CHO2_pos	7							1.01274	1.1015	0.905068	0.568905	8.37548e-08	3.76308e-08	7.07576e-12	2.07934e-12	FALSE
175.096	positive	0.0287209	C8H14O4	CHO4_pos	2	suberic acid 2-propylglutaric acid 1,5-dimethyl 2-methylpentanedioate 2-{[2-(oxiran-2-ylmethoxy)ethoxy]methyl}oxirane 2,3-dihydroxypropyl 2-methylbut-2-enoate	HMDB0000893 HMDB0060684 HMDB0244293 HMDB0252071 HMDB0252854	Fatty Acyls Fatty Acyls Fatty Acyls Epoxides Glycerolipids	C08278 C16658	NA NA NA NA NA		1.21854	1.45219	1.05352	0.828321	5.41674e-10	5.45344e-10	1.42985e-14	1.59016e-14	FALSE
175.108	positive	0.0666282	C7H14N2O3	CHN2O3_pos	2	N(2)-acetyl-L-ornithine 6-amino-2-formamidohexanoic acid glycine, N-DL-valyl-	HMDB0003357 HMDB0252452 HMDB0259740	Carboxylic acids and derivatives Carboxylic acids and derivatives Carboxylic acids and derivatives	C00437	NA NA NA		1.0215	1.04005	1.46212	1.08702	9.79588e-05	2.09273e-05	1.3896e-06	1.26273e-07	FALSE
175.109	positive											0.367346	0.79444	0.31601	0.602765	0.458518	0.0500181	5.22469e-05	3.80157e-06	FALSE
175.112	positive	-0.00689241	C12H14O	CHO_pos	6							0.666218	1.50923	0.528185	0.561713	0.000214352	4.23549e-05	8.98243e-11	1.90693e-11	FALSE
175.115	positive											1.11366	1.00717	-0.500114	0.910482	0.470495	0.0512169	4.98954e-06	4.16984e-07	FALSE
175.119	positive	-0.182641	C6H14N4O2	CHN4O2_pos	2	L-arginine adipic acid dihydrazide arginine 2-amino-4-(N-methylcarbamimidamido)butanoic acid	HMDB0000517 HMDB0248014 HMDB0251511 HMDB0255374	Carboxylic acids and derivatives Carboxylic acids and derivatives Carboxylic acids and derivatives Carboxylic acids and derivatives	C00062 C02385	Arginine and proline metabolism | Aspartate Metabolism | Glycine, serine and threonine metabolism | Urea Cycle NA NA NA	Arginine and proline metabolism | Aspartate Metabolism | Glycine, serine and threonine metabolism | Urea Cycle	0.625251	0.910374	1.89853	1.57699	7.39128e-06	2.05706e-06	1.76885e-08	2.23124e-09	TRUE
175.131	positive	-0.34688	[13C]C11H15N	[13C]CHN_pos	6							0.31008	0.458997	0.818498	-0.108478	0.356708	0.0395952	0.732247	0.0357125	FALSE
175.133	positive	-0.00229719	C9H18O3	CHO3_pos	1							0.749673	1.07339	1.12003	0.613046	6.85621e-09	4.28298e-09	2.76932e-11	6.77495e-12	FALSE
175.144	positive	-0.0218219	C8H18N2O2	CHN2O2_pos	1	6-amino-2-(ethylamino)hexanoic acid butylhydroxybutylnitrosamine	HMDB0252051 HMDB0255094	Carboxylic acids and derivatives Organonitrogen compounds		NA NA		1.05287	0.70616	1.54958	0.0163229	4.22315e-08	2.07551e-08	0.96509	0.0463506	FALSE
175.148	positive	0.0195244	C13H18	CH_pos	5							1.46764	1.32844	0.755915	0.514706	1.13044e-05	2.98583e-06	6.26351e-09	8.58414e-10	FALSE
175.152	positive	-0.227397	[13C]C8H19NO2	[13C]CHNO2_pos	1							1.11954	0.681149	0.934017	0.763856	0.004635	0.000704337	0.00072227	4.58519e-05	FALSE
175.169	positive	0.0815333	C10H22O2	CHO2_pos	0							1.37859	1.1434	0.0168575	1.19958	0.966978	0.0994381	4.60226e-06	3.8635e-07	FALSE
175.977	positive											0.96034	0.825582	0.936727	1.23436	0.000138476	2.85821e-05	8.62447e-13	3.56814e-13	FALSE
175.984	positive											1.27867	0.845054	1.065	1.46911	4.12355e-07	1.55832e-07	8.9661e-07	8.3864e-08	FALSE
175.997	positive											1.23768	0.918855	2.23691	1.40712	4.35633e-06	1.27251e-06	3.55163e-07	3.55224e-08	FALSE
176	positive											0.843979	0.796316	3.028	2.51577	5.12356e-05	1.16106e-05	4.84027e-10	8.46057e-11	TRUE
176.023	positive											0.596413	1.07253	1.38904	1.61963	0.0064951	0.000965492	0.0002169	1.46559e-05	FALSE
176.055	positive	0.065125	C6H9NO5	CHNO5_pos	3	acetyl-L-aspartic acid 2-aminopropanoyl 2-oxopropaneperoxoate methyl [(2-methoxy-2-oxoethyl)carbamoyl]formate	HMDB0000812 HMDB0248106 HMDB0251540	Carboxylic acids and derivatives Carboxylic acids and derivatives Carboxylic acids and derivatives	C01042	Aspartate Metabolism NA NA	Aspartate Metabolism	1.06914	0.921894	1.76466	1.20907	3.50495e-08	1.76093e-08	6.31178e-08	7.18421e-09	FALSE
176.071	positive	0.0297035	C10H9NO2	CHNO2_pos	7	β-indole-3-acetic acid hydroxyindoleacetaldehyde 3-(aminomethyl)chromen-2-one indole acetic acid 3-methoxy-1H-quinolin-2-one 5-hydroxyindole acetic acid 7-amino-4-methylcoumarin 8-methoxy-1H-quinolin-2-one 1H-indol-2-ylacetic acid N-phenylsuccinimide	HMDB0000197 HMDB0004073 HMDB0245783 HMDB0245796 HMDB0245921 HMDB0246742 HMDB0247230 HMDB0247449 HMDB0253468 HMDB0255233	Indoles and derivatives Indoles and derivatives Coumarins and derivatives Indoles and derivatives Quinolines and derivatives Indoles and derivatives Coumarins and derivatives Quinolines and derivatives Indoles and derivatives Pyrrolidines	C00954 C05634 C01386	Tryptophan metabolism Tryptophan metabolism NA NA NA NA NA NA NA NA	Tryptophan metabolism	1.08256	0.461737	1.32113	0.508847	1.06405e-05	2.83504e-06	2.90646e-05	2.18427e-06	FALSE
176.079	positive	-0.117666	[13C]C10H10O2	[13C]CHO2_pos	7							0.867977	0.619487	0.759098	0.382245	0.0139147	0.00194046	0.0139752	0.000784299	FALSE
176.092	positive	0.0342692	C7H13NO4	CHNO4_pos	2	1,5-dimethyl 2-aminopentanedioate 2-[(carboxymethyl)amino]-3-methylbutanoic acid 2-methoxyethyl 3-carbamoylpropanoate	HMDB0243725 HMDB0255021 HMDB0256203	Carboxylic acids and derivatives Carboxylic acids and derivatives Fatty Acyls		NA NA NA		1.18473	1.12933	1.46278	1.40813	1.65931e-11	4.38946e-11	3.67473e-13	1.77472e-13	FALSE
176.1	positive	0.115368	[13C]C7H14O4	[13C]CHO4_pos	2							1.09923	1.05656	1.291	1.21735	9.12413e-05	1.96053e-05	1.39802e-05	1.09335e-06	FALSE
176.107	positive	-0.00114221	C11H13NO	CHNO_pos	6	1-benzoylpyrrolidine 5-apb dmaca reagent 2-(dimethylamino)-3-phenylprop-2-enal	HMDB0243833 HMDB0246716 HMDB0247143 HMDB0251393	Benzene and substituted derivatives Benzofurans Cinnamaldehydes Cinnamaldehydes		NA NA NA NA		0.711631	0.85099	0.348949	0.115943	0.0418305	0.00538313	0.105482	0.00554255	FALSE
176.115	positive	0.0228431	[13C]C11H14O	[13C]CHO_pos	6							0.540207	1.41643	0.304862	0.56705	0.095707	0.0116541	1.2791e-10	2.60813e-11	FALSE
176.128	positive	0.00342621	C8H17NO3	CHNO3_pos	1	2-[(2-hydroxypropyl)amino]-3-methylbutanoic acid 2-[(3-hydroxypropyl)amino]-3-methylbutanoic acid 4-amino-3-hydroxy-6-methylheptanoic acid	HMDB0254992 HMDB0255001 HMDB0258487	Carboxylic acids and derivatives Carboxylic acids and derivatives Carboxylic acids and derivatives		NA NA NA		1.07194	1.44757	0.76584	1.37979	4.04026e-08	1.99888e-08	3.87263e-13	1.84457e-13	FALSE
176.143	positive	-0.0319751	C12H17N	CHN_pos	5	1-phenylcyclohexylamine	HMDB0243991	Organonitrogen compounds		NA		0.773527	0.745559	0.145971	0.404226	0.329788	0.0368993	0.00744746	0.000428267	FALSE
176.151	positive	0.0491024	[13C]C12H18	[13C]CH_pos	5							0.940347	0.574553	0.617684	0.40991	0.0074691	0.00109769	0.000304301	2.01792e-05	FALSE
176.164	positive	-0.027404	C9H21NO2	CHNO2_pos	0							1.2318	0.677277	0.842442	1.17247	0.00193033	0.00031355	3.02047e-07	3.05247e-08	FALSE
176.981	positive											1.34669	0.806337	1.05046	0.810941	2.83135e-07	1.11892e-07	2.27353e-07	2.33657e-08	FALSE
176.984	positive											1.09118	0.857126	1.24324	1.1595	2.65987e-09	1.99006e-09	3.75837e-15	6.60279e-15	FALSE
177.007	positive											0.475095	1.31745	0.998683	1.1615	6.62375e-05	1.45832e-05	7.52519e-12	2.18755e-12	FALSE
177.034	positive	1.81109	C13H4O	CHO_pos	12							0.802978	0.931808	1.07683	1.88917	1.70282e-09	1.39477e-09	0.000705376	4.48028e-05	FALSE
177.039	positive	0.657835	C6H8O6	CHO6_pos	3	vitamin C D-glucuronic acid, γ-lactone 5-(1,2-dihydroxyethyl)-4-hydroxyoxolane-2,3-dione C-level 5-(1,2-dihydroxyethyl)furan-2,3,4-triol 3,6-bis(hydroxymethyl)-1,4-dioxane-2,5-dione 2-hydroxy-5-oxohexanedioic acid 5-(1,2-dihydroxyethyl)-3-hydroxyoxolane-2,4-dione	HMDB0000044 HMDB0242712 HMDB0246713 HMDB0248647 HMDB0248912 HMDB0251280 HMDB0255328 HMDB0257585 HMDB0260162	Dihydrofurans Lactones Lactones Dihydrofurans Heteroaromatic compounds Dioxanes Organooxygen compounds Keto acids and derivatives Lactones	C01041	Tyrosine metabolism | Tyrosine metabolism NA NA NA NA NA NA NA NA	Tyrosine metabolism | Tyrosine metabolism	0.724869	1.47226	1.73918	1.79189	0.0121793	0.00171972	5.37614e-05	3.90123e-06	TRUE
177.043	positive											0.799074	0.647398	2.04212	1.69961	0.0323941	0.00424356	2.41542e-08	2.96505e-09	TRUE
177.05	positive	-1.17926	C5H8N2O5	CHN2O5_pos	3							1.26937	0.840183	1.96226	1.01845	3.8471e-05	8.95277e-06	2.09912e-05	1.60997e-06	FALSE
177.055	positive	-0.00227212	C10H8O3	CHO3_pos	7	erythrocentaurin	HMDB0251931	Benzopyrans		NA		1.09202	1.37947	0.926657	0.57502	6.70397e-08	3.12303e-08	2.60864e-10	4.89506e-11	FALSE
177.07	positive	1.43812	[13C]C4H9N3O4	[13C]CHN3O4_pos	3							0.784111	0.54319	1.27319	1.67986	5.24366e-09	3.45461e-09	0.000108936	7.61775e-06	FALSE
177.076	positive	0.115864	C7H12O5	CHO5_pos	2	2-isopropyl-malic acid	HMDB0000402	Fatty Acyls	C02504	NA		0.849339	1.02071	1.53245	1.52492	4.22011e-05	9.72047e-06	3.6489e-07	3.64201e-08	TRUE
177.085	positive	1.40279	[13C]C8H9N3O	[13C]CHN3O_pos	7							0.63713	0.87871	-0.330069	-0.164046	0.533001	0.0576099	0.627801	0.0308045	FALSE
177.089	positive											1.3897	0.197251	-2.33625	0.401291	0.0120329	0.00170136	0.447307	0.0222498	FALSE
177.091	positive	0.0238523	C11H12O2	CHO2_pos	6							1.51828	1.4528	0.879051	0.516935	3.44936e-09	2.46344e-09	1.6273e-10	3.20753e-11	FALSE
177.11	positive	-0.198747	[13C]C10H13NO	[13C]CHNO_pos	6							0.703916	1.5688	0.742631	-0.705036	0.129962	0.015512	1.52311e-05	1.18468e-06	FALSE
177.112	positive	0.0851765	C8H16O4	CHO4_pos	1	4,5-dihydroxy-3-methoxy-3-methylhexanal 3-hydroxybutyl 3-hydroxybutanoate metaldehyde	HMDB0250311 HMDB0253792 HMDB0254499	Organooxygen compounds Hydroxy acids and derivatives Organooxygen compounds	C18744	NA NA NA		1.18593	1.07887	1.06942	0.508813	7.47294e-09	4.60718e-09	1.71698e-06	1.54173e-07	FALSE
177.125	positive											0.646341	0.91074	0.994012	1.21502	0.247607	0.0282405	0.0165047	0.000920716	FALSE
177.127	positive	-0.00681353	C12H16O	CHO_pos	5	1-(4-butylphenyl)ethanone	HMDB0246227	Organooxygen compounds		NA		0.975518	1.03398	0.692247	0.3612	4.30473e-06	1.26028e-06	4.6136e-07	4.54317e-08	FALSE
177.131	positive	-0.0806249	[13C]C7H17NO3	[13C]CHNO3_pos	1							0.836922	1.17793	0.733045	1.88344	0.000274023	5.29351e-05	9.98119e-11	2.08608e-11	FALSE
177.147	positive	-0.115817	[13C]C11H17N	[13C]CHN_pos	5							0.750957	0.61463	-0.211812	0.449642	0.72197	0.0762234	0.0696414	0.00370588	FALSE
177.149	positive	0.0545017	C9H20O3	CHO3_pos	0							2.09965	0.813348	-0.827181	0.501763	0.0138845	0.00193676	0.0490581	0.00264012	FALSE
177.16	positive	0.0351968	C8H20N2O2	CHN2O2_pos	0							0.928612	0.979211	1.33014	1.70327	0.000845619	0.000147624	4.79958e-09	6.69515e-10	FALSE
177.164	positive	0.019301	C13H20	CH_pos	4							1.51051	1.58033	1.09899	0.993891	6.42458e-08	3.0091e-08	1.01112e-11	2.81767e-12	FALSE
177.168	positive	-0.395094	[13C]C8H21NO2	[13C]CHNO2_pos	0							0.733243	0.730354	0.873781	1.18511	0.0114796	0.00162891	3.676e-08	4.38375e-09	FALSE
177.956	positive											1.10017	1.38337	1.55282	1.41375	2.86048e-08	1.49509e-08	2.01168e-15	4.82886e-15	FALSE
177.972	positive											1.11318	1.82393	1.68458	1.28115	2.55792e-06	7.82913e-07	5.25284e-10	9.07056e-11	FALSE
177.98	positive											0.889752	1.16043	1.60072	0.879302	0.00156633	0.000258886	6.51546e-05	4.67758e-06	FALSE
177.985	positive	-1.49397	[13C]C7O5	[13C]CHO5_pos	9							0.865688	0.897653	1.96791	1.77993	0.00797993	0.00116879	1.17136e-08	1.5219e-09	TRUE
177.988	positive											1.0741	0.777914	1.65986	1.7741	1.7051e-07	7.08961e-08	1.91005e-10	3.71352e-11	TRUE
177.993	positive											1.15281	0.890008	1.65677	1.88539	1.7771e-06	5.65973e-07	0.000275731	1.84156e-05	TRUE
178.002	positive											0.840256	0.878851	2.13008	0.818389	0.00037907	7.11341e-05	0.000311706	2.06477e-05	FALSE
178.05	positive	0.00338901	C9H7NO3	CHNO3_pos	7	2H-1,2-benzoxazine-6-carboxylic acid	HMDB0249035	Benzoxazines		NA		0.982243	1.01123	1.41474	0.950155	0.00272871	0.000430555	0.0016545	0.000101369	FALSE
178.058	positive	0.0835919	[13C]C9H8O3	[13C]CHO3_pos	7							0.825546	1.16519	1.07149	0.581305	0.00198169	0.00032109	4.59426e-09	6.4421e-10	FALSE
178.069	positive											0.421238	0.818437	0.673521	0.579222	0.00281101	0.000442062	3.98177e-10	7.09814e-11	FALSE
178.071	positive	-0.161524	C6H11NO5	CHNO5_pos	2	2-aminopropanoyl 2-hydroxypropaneperoxoate	HMDB0248104	Carboxylic acids and derivatives		NA		1.03193	1.09704	1.73593	1.6673	5.80579e-07	2.10949e-07	2.66645e-11	6.53648e-12	TRUE
178.086	positive	-0.0271065	C10H11NO2	CHNO2_pos	6	hydroxytryptophol 1,2,3,4-tetrahydroisoquinoline-3-carboxylic acid MDAI 1,2,3,4-tetrahydroisoquinoline-1-carboxylic acid N-[2-(4-methoxyphenyl)ethenyl]formamide 2-(1H-indol-3-yl)ethaneperoxol 1,2,3,4-tetrahydroisoquinolin-1-yl formate	HMDB0001855 HMDB0244117 HMDB0244545 HMDB0246650 HMDB0252440 HMDB0257988 HMDB0258099	Indoles and derivatives Tetrahydroisoquinolines Benzodioxoles Tetrahydroisoquinolines Phenol ethers Indoles and derivatives Tetrahydroisoquinolines		NA NA NA NA NA NA NA		0.904579	0.903981	1.16851	0.98501	3.96275e-05	9.18071e-06	4.85098e-06	4.06105e-07	FALSE
178.094	positive	0.0530812	[13C]C10H12O2	[13C]CHO2_pos	6							0.631858	0.888604	0.787147	0.35807	0.00298627	0.000467497	3.72643e-06	3.17554e-07	FALSE
178.107	positive	-0.0225861	C7H15NO4	CHNO4_pos	1							1.15354	1.05852	1.22951	1.44109	3.45871e-09	2.46671e-09	8.21945e-12	2.35827e-12	FALSE
178.123	positive	-0.00112921	C11H15NO	CHNO_pos	5	phenmetrazine (2,2-dimethyl-1-nitrosopropyl)benzene (2,2-dimethyl-3-nitrosopropyl)benzene 2-(methylamino)-1-(3-methylphenyl)propan-1-one N-tert-butyl-1-phenylmethanimine oxide 2-(diethylamino)benzaldehyde 4-(diethylamino)benzaldehyde N-butyl-1-phenylmethanimine oxide	HMDB0014968 HMDB0242482 HMDB0242483 HMDB0245933 HMDB0246168 HMDB0246249 HMDB0246302 HMDB0255096	Oxazinanes Benzene and substituted derivatives Benzene and substituted derivatives Organooxygen compounds Benzene and substituted derivatives Benzene and substituted derivatives Benzene and substituted derivatives Benzene and substituted derivatives	C07432	NA NA NA NA NA NA NA NA		0.998468	1.44982	0.934532	0.702307	6.96068e-07	2.48385e-07	3.52889e-13	1.72143e-13	FALSE
178.131	positive	-0.0338747	[13C]C11H16O	[13C]CHO_pos	5							0.506557	0.963134	0.408632	0.183771	0.00686589	0.00101711	0.0294509	0.0016114	FALSE
178.144	positive	0.00338722	C8H19NO3	CHNO3_pos	0							1.24032	0.939024	1.44469	1.82528	4.04628e-09	2.80475e-09	5.82331e-10	9.98453e-11	FALSE
178.159	positive	0.0248375	C12H19N	CHN_pos	4	d-N-propylamphetamine	HMDB0255237	Benzene and substituted derivatives		NA		0.984863	0.889914	1.13519	0.595978	1.9032e-06	6.01702e-07	6.12542e-08	6.98521e-09	FALSE
178.167	positive	-0.00790247	[13C]C12H20	[13C]CH_pos	4							1.50006	1.57395	1.10414	0.995707	7.76243e-08	3.5429e-08	1.05257e-11	2.91975e-12	FALSE
178.17	positive											1.44956	0.957775	1.64993	0.825047	0.000214269	4.23547e-05	0.00217732	0.000131968	FALSE
178.18	positive	0.198676	C9H23NO2	CHNO2_pos	-1							0.602809	0.661693	1.52262	1.25035	0.000164675	3.3457e-05	3.81901e-07	3.79462e-08	FALSE
178.951	positive											0.969507	0.994177	2.13379	1.98103	3.63166e-06	1.07476e-06	1.58387e-10	3.12956e-11	TRUE
178.973	positive											0.503535	0.839553	3.01429	2.04872	0.0227614	0.00305344	2.28253e-06	2.01083e-07	TRUE
178.975	positive											1.40516	1.85842	1.26091	1.78449	2.21853e-06	6.91693e-07	1.22758e-10	2.51579e-11	FALSE
178.986	positive											1.1063	1.34327	1.57439	1.27838	2.14396e-05	5.30353e-06	6.96432e-11	1.52249e-11	FALSE
179.013	positive	1.82129	C12H2O2	CHO2_pos	12							1.10642	0.776326	1.35193	1.27633	6.4961e-06	1.83451e-06	7.22602e-06	5.89861e-07	FALSE
179.023	positive											0.830363	0.856442	1.43782	1.2905	4.35874e-07	1.63292e-07	4.56428e-12	1.42968e-12	FALSE
179.032	positive	1.79863	C5H2N6O2	CHN6O2_pos	8							0.82225	1.44898	1.17375	1.41923	0.00155339	0.000257156	5.01296e-10	8.70595e-11	FALSE
179.034	positive	-0.0280857	C9H6O4	CHO4_pos	7	ninhydrin	HMDB0255614	Indanes		NA		1.529	0.942396	1.69534	1.26961	3.12264e-08	1.6062e-08	1.99977e-09	3.01509e-10	FALSE
179.064	positive	-0.0426829	[13C]C7H7N3O2	[13C]CHN3O2_pos	7							0.737639	0.880721	1.03066	1.1709	1.66197e-06	5.34892e-07	3.81474e-09	5.45314e-10	FALSE
179.066	positive	0.0134787	C5H10N2O5	CHN2O5_pos	2	4,5-dihydroxy-1,3-bis(hydroxymethyl)imidazolidin-2-one	HMDB0248602	Azolidines		NA		0.976072	0.618803	1.26538	1.07801	4.50299e-08	2.19431e-08	1.97551e-08	2.47134e-09	FALSE
179.068	positive	0.0269572	C6H6N6O	CHN6O_pos	7	N-methyl-N-nitroso-7H-purin-6-amine	HMDB0247094	Imidazopyrimidines		NA		0.45724	0.849521	0.539008	0.642763	0.00122639	0.000207868	0.033191	0.0018095	FALSE
179.07	positive	-0.0022464	C10H10O3	CHO3_pos	6	p-methoxy-cinnamic acid 4-methoxycinnamic acid	HMDB0002040 HMDB0246971	Cinnamic acids and derivatives Cinnamic acids and derivatives		NA NA		1.65066	1.40654	1.07575	0.693604	9.46761e-10	8.59693e-10	1.67346e-10	3.28781e-11	FALSE
179.074	positive	-0.524521	[13C]C5H11NO5	[13C]CHNO5_pos	2							0.711756	0.683135	2.3155	1.10138	0.00371277	0.000572584	0.0133582	0.000750543	FALSE
179.081	positive	-0.47059	C9H10N2O2	CHN2O2_pos	6	phenacemide 6-amino-2-methyl-2,3-dihydro-1,3-benzoxazin-4-one 2-[methyl(nitroso)amino]-1-phenylethanone	HMDB0015253 HMDB0247711 HMDB0252007	Benzene and substituted derivatives Benzoxazines Organooxygen compounds	C07428	NA NA NA		1.20809	1.04596	2.1308	1.28983	0.00142818	0.000238332	0.000155364	1.06795e-05	FALSE
179.086	positive	0.0190927	C14H10	CH_pos	10	anthracene tolan phenanthrene	HMDB0248460 HMDB0251456 HMDB0256390	Anthracenes Benzene and substituted derivatives Phenanthrenes and derivatives	C14315 C11422	NA NA NA		0.596339	1.13285	1.02947	0.845536	3.32093e-05	7.8231e-06	0.000261685	1.75064e-05	FALSE
179.091	positive	0.00224613	C7H14O5	CHO5_pos	1	6-ethyloxane-2,3,4,5-tetrol 2-(hydroxymethyl)-6-methyloxane-3,4,5-triol 2,3-dihydroxypropyl 2-hydroxybutanoate	HMDB0242656 HMDB0249118 HMDB0252839	Organooxygen compounds Organooxygen compounds Glycerolipids		NA NA NA		1.21131	1.03147	0.96505	1.56656	6.57797e-06	1.85158e-06	3.20618e-08	3.85762e-09	FALSE
179.104	positive											1.02914	0.716285	-1.33953	0.765111	0.108501	0.0131074	0.159584	0.00825296	FALSE
179.107	positive	0.0235823	C11H14O2	CHO2_pos	5	isoeugenyl methyl ether phenyl pentanoate 5-phenylpent-4-ene-1-peroxol	HMDB0254595 HMDB0256425 HMDB0256717	Benzene and substituted derivatives Phenol esters Benzene and substituted derivatives		NA NA NA		0.948633	1.62659	0.68249	0.597115	3.62676e-06	1.07454e-06	4.42249e-12	1.39246e-12	FALSE
179.11	positive											0.49432	0.749971	0.866439	-0.721366	0.00836161	0.0012209	0.000288549	1.92029e-05	FALSE
179.126	positive	-0.140356	[13C]C10H15NO	[13C]CHNO_pos	5							0.932066	0.542911	1.07362	0.735966	0.000142169	2.92628e-05	7.81011e-08	8.69373e-09	FALSE
179.128	positive	0.196496	C8H18O4	CHO4_pos	0							1.00182	0.952443	1.53304	1.02003	0.000277314	5.34912e-05	7.81459e-05	5.56085e-06	FALSE
179.143	positive	-0.00673644	C12H18O	CHO_pos	4	propofol [1,1'-bi(cyclohexylidene)]-2-one	HMDB0014956 HMDB0245090	Benzene and substituted derivatives Organooxygen compounds	C07523	NA NA		1.14181	1.67166	0.665963	0.680241	1.51604e-06	4.9313e-07	5.96523e-10	1.01632e-10	FALSE
179.154	positive	-0.0258214	C11H18N2	CHN2_pos	4	4-(2-aminopropyl)-N,3-dimethylaniline	HMDB0246317	Benzene and substituted derivatives		NA		0.699677	0.88313	0.71646	0.277555	0.0183248	0.00249769	0.145786	0.00756196	FALSE
179.162	positive	-0.0583761	[13C]C11H19N	[13C]CHN_pos	4							1.19294	0.81018	1.63762	0.65455	0.000164738	3.34566e-05	0.0021695	0.00013156	FALSE
179.17	positive											0.880557	1.2644	1.00533	1.07736	0.00414532	0.000634012	1.68607e-09	2.58881e-10	FALSE
179.179	positive	0.0190827	C13H22	CH_pos	3							0.761682	1.33411	0.661724	0.643109	4.63887e-05	1.06003e-05	1.10904e-09	1.77947e-10	FALSE
179.903	positive											1.2478	1.1843	1.31786	1.29535	1.69392e-08	9.39337e-09	1.09018e-08	1.42482e-09	FALSE
179.935	positive											0.433387	0.355563	1.23928	0.837667	0.0197558	0.00268215	3.50865e-05	2.60454e-06	FALSE
179.959	positive											0.839575	1.16994	2.07616	1.48912	0.000205687	4.07825e-05	8.61638e-12	2.45472e-12	FALSE
180.026	positive											0.453452	0.748134	2.13724	1.72203	0.00739408	0.00108728	3.9321e-06	3.33673e-07	TRUE
180.029	positive	-0.189921	C8H5NO4	CHNO4_pos	7							0.625328	0.881866	0.784696	1.19693	0.303481	0.0341623	1.26329e-06	1.15531e-07	FALSE
180.066	positive	-0.0524969	C9H9NO3	CHNO3_pos	6	hippuric acid 3-(3,4-dihydroxyphenyl)prop-2-enamide 4-acetamidobenzoic acid 5,6-dihydroxy-1-methyl-2H-indol-3-one N-[2-(2,5-dihydroxyphenyl)ethenyl]formamide N-(2-hydroxybenzoyl)ethanimidic acid 1-methylindole-3,5,6-triol	HMDB0000714 HMDB0245300 HMDB0246328 HMDB0248030 HMDB0251902 HMDB0255046 HMDB0257859	Benzene and substituted derivatives Cinnamic acids and derivatives Benzene and substituted derivatives Indoles and derivatives Phenols Benzene and substituted derivatives Indoles and derivatives	C01586	NA NA NA NA NA NA NA		1.25281	1.03543	1.75379	1.64948	7.45364e-09	4.60623e-09	3.88724e-08	4.59945e-09	TRUE
180.074	positive	-0.0848847	[13C]C9H10O3	[13C]CHO3_pos	6							1.52384	0.839734	1.50435	0.559846	1.30996e-07	5.6225e-08	5.08329e-05	3.70201e-06	FALSE
180.081	positive	1.08447	[13C]C3H10N4O4	[13C]CHN4O4_pos	2							1.36759	0.636173	1.63508	1.46295	3.06692e-07	1.20103e-07	0.00856416	0.000489811	FALSE
180.087	positive	0.0636589	C6H13NO5	CHNO5_pos	1	glucosamine (2R,3S,4R,5R)-2-(aminomethyl)oxane-2,3,4,5-tetrol glucosamine 2-amino-6-(hydroxymethyl)oxane-3,4,5-triol glucosamine 2-amino-2,5-bis(hydroxymethyl)oxolane-3,4-diol tricine	HMDB0001514 HMDB0002030 HMDB0242589 HMDB0243826 HMDB0245095 HMDB0252497 HMDB0259178	Organooxygen compounds Organooxygen compounds Organooxygen compounds Organooxygen compounds Organooxygen compounds Organooxygen compounds Carboxylic acids and derivatives	C00329	Amino Sugar Metabolism NA NA NA NA NA NA	Amino Sugar Metabolism	1.05193	1.19126	1.53886	1.78068	1.01266e-10	1.43067e-10	3.03312e-12	1.02275e-12	TRUE
180.102	positive	0.0290349	C10H13NO2	CHNO2_pos	5	(+)-salsolinol salsolinol methyl 2-amino-3-phenylpropanoate phenibut N-(4-hydroxyphenyl)butanamide 6-amino-5,6,7,8-tetrahydronaphthalene-2,3-diol prop-2-yn-1-yl 1-methyl-5,6-dihydro-2H-pyridine-3-carboxylate homophenylalanine fusaric acid phenacetin palmita 2-(1-phenylpropan-2-yl)-1,3,2-dioxazetidine	HMDB0005199 HMDB0042012 HMDB0245704 HMDB0246346 HMDB0246632 HMDB0248032 HMDB0248570 HMDB0250764 HMDB0252556 HMDB0256387 HMDB0256418 HMDB0257801	Tetrahydroisoquinolines Tetrahydroisoquinolines Carboxylic acids and derivatives Carboxylic acids and derivatives Benzene and substituted derivatives Tetralins Carboxylic acids and derivatives Pyridines and derivatives Benzene and substituted derivatives Benzene and substituted derivatives Benzene and substituted derivatives	C09642 C09642 C10146 C07591	NA NA NA NA NA NA NA NA NA NA NA NA		1.34193	0.924942	0.81086	0.66722	7.57322e-06	2.09868e-06	9.16137e-11	1.93813e-11	FALSE
180.11	positive	-0.00335003	[13C]C10H14O2	[13C]CHO2_pos	5							0.553291	1.13678	0.469299	0.591845	0.00167355	0.000275728	5.76843e-11	1.29852e-11	FALSE
180.114	positive											0.0185564	1.29306	0.0376369	0.146857	0.852985	0.0888079	0.270217	0.0137054	FALSE
180.123	positive	0.0893277	C7H17NO4	CHNO4_pos	0							1.20775	0.99603	1.26856	2.02869	6.05095e-06	1.72004e-06	6.73711e-09	9.171e-10	FALSE
180.138	positive	-0.0011165	C11H17NO	CHNO_pos	4	1-(2,6-dimethylphenoxy)propan-2-amine 2-(methylamino)-1-(4-methylphenyl)propan-1-ol (1-methoxy-1-phenylpropan-2-yl)(methyl)amine para-methoxymethamphetamine	HMDB0014523 HMDB0251292 HMDB0251838 HMDB0256050	Phenol ethers Benzene and substituted derivatives Benzene and substituted derivatives Benzene and substituted derivatives	C07220	NA NA NA NA		0.829931	0.646455	0.303734	0.461881	0.140513	0.0166945	6.46797e-05	4.64624e-06	FALSE
180.146	positive	0.022329	[13C]C11H18O	[13C]CHO_pos	4							0.642628	1.31704	0.310343	0.689248	0.0108508	0.0015473	1.90143e-07	1.98103e-08	FALSE
180.159	positive	-0.0524694	C8H21NO3	CHNO3_pos	-1							1.19963	0.656299	0.699199	1.05743	0.000548911	9.96514e-05	4.51064e-08	5.26259e-09	FALSE
180.175	positive	-0.0312557	C12H21N	CHN_pos	3	rimantadine memantine	HMDB0014621 HMDB0015177	Organonitrogen compounds Organonitrogen compounds	C07236 C13736	NA NA		0.198752	1.10629	-0.0461962	0.621205	0.886083	0.0919032	0.000914554	5.74271e-05	FALSE
180.183	positive	-0.00781357	[13C]C12H22	[13C]CH_pos	3							0.539349	0.40789	-0.0883747	0.547281	0.713681	0.0753791	5.53829e-06	4.59832e-07	FALSE
180.943	positive											0.717234	0.8508	1.83041	0.901541	0.00213519	0.000344346	9.86071e-07	9.15255e-08	FALSE
180.972	positive											0.964092	1.46599	1.69079	1.13686	7.09363e-06	1.98702e-06	6.39921e-07	6.12731e-08	FALSE
181.013	positive	0.335545	C8H4O5	CHO5_pos	7							0.713185	0.983688	3.84408	2.00564	0.00216586	0.000348966	6.34382e-05	4.56652e-06	TRUE
181.047	positive											0.591803	1.27531	1.22112	1.29138	8.49363e-06	2.31538e-06	1.2241e-08	1.57942e-09	FALSE
181.05	positive	-0.0277713	C9H8O4	CHO4_pos	6	4-hydroxyphenylpyruvic acid aspirin caffeic acid methyl hydrogen phthalate (2E)-3-(3,5-dihydroxyphenyl)prop-2-enoic acid	HMDB0000707 HMDB0001879 HMDB0001964 HMDB0002130 HMDB0032131	Benzene and substituted derivatives Benzene and substituted derivatives Cinnamic acids and derivatives Benzene and substituted derivatives Cinnamic acids and derivatives	C01179 C01405 C01481	Phenylalanine and Tyrosine Metabolism | Tyrosine metabolism NA NA NA NA	Phenylalanine and Tyrosine Metabolism | Tyrosine metabolism	1.3113	0.914351	1.19353	1.08747	2.94531e-08	1.53017e-08	1.14357e-11	3.13276e-12	FALSE
181.065	positive	-0.00666454	C13H8O	CHO_pos	10							0.765267	0.541491	1.14284	0.678305	9.00503e-06	2.43558e-06	2.88836e-10	5.36185e-11	FALSE
181.068	positive											1.5041	1.08723	1.28828	-0.00734676	6.13564e-10	6.02512e-10	0.906638	0.0436471	FALSE
181.084	positive											2.31667	1.43936	1.31865	1.11614	1.11406e-08	6.51216e-09	9.43469e-11	1.98728e-11	FALSE
181.086	positive	-0.00222125	C10H12O3	CHO3_pos	5	3-(3-methoxyphenyl)propanoic acid propylparaben 3-(3-hydroxyphenyl)-2-methylpropanoic acid phenoxyisobutyric acid 1-(3,4-dihydroxyphenyl)-2-methylpropan-1-one isopropyl 4-hydroxybenzoate	HMDB0011751 HMDB0032574 HMDB0060734 HMDB0245216 HMDB0246944 HMDB0253675	Phenylpropanoic acids Benzene and substituted derivatives Phenylpropanoic acids Benzene and substituted derivatives Organooxygen compounds Benzene and substituted derivatives	C15475 C20343	NA NA NA NA NA NA		1.21597	1.50567	0.862255	0.655733	2.09127e-09	1.64787e-09	1.96259e-13	1.10654e-13	FALSE
181.097	positive	0.0899551	C9H12N2O2	CHN2O2_pos	5	2-amino-3-(4-hydroxyphenyl)propanamide (6-amino-3,4-dihydro-2H-1,4-benzoxazin-3-yl)methanol 2-amino-3-(phenylamino)propanoic acid amino 2-amino-3-phenylpropanoate pyridin-3-ylmethyl N,N-dimethylcarbamate	HMDB0013319 HMDB0243625 HMDB0245791 HMDB0260342 HMDB0260418	Carboxylic acids and derivatives Benzoxazines Carboxylic acids and derivatives Carboxylic acids and derivatives Pyridines and derivatives		NA NA NA NA NA		1.06241	1.02017	1.57696	0.889962	1.3509e-05	3.49865e-06	5.87867e-06	4.86428e-07	FALSE
181.101	positive	-0.0366475	C14H12	CH_pos	9	stilbene	HMDB0248982	Stilbenes		NA		0.365685	0.388064	0.49779	0.582829	0.0382216	0.00494448	1.17352e-06	1.07932e-07	FALSE
181.105	positive	0.168797	[13C]C9H13NO2	[13C]CHNO2_pos	5							1.17504	0.773526	1.49433	0.504412	0.000246428	4.80339e-05	0.00233303	0.000140912	FALSE
181.118	positive	-1.46021	C6H16N2O4	CHN2O4_pos	0							1.13986	0.374184	-0.248862	0.18363	0.656119	0.0698113	0.542174	0.0267601	FALSE
181.122	positive	0.0233184	C11H16O2	CHO2_pos	4	3,7-dimethylbicyclo[4.1.0]heptane-1,7-dicarbaldehyde	HMDB0260264	Prenol lipids		NA		1.02075	0.986144	0.535235	0.355865	2.02052e-06	6.34918e-07	6.03172e-07	5.80524e-08	FALSE
181.125	positive											1.22373	0.861725	1.26745	-0.165994	2.20402e-05	5.42363e-06	0.466929	0.0231784	FALSE
181.142	positive	-0.0277571	[13C]C10H17NO	[13C]CHNO_pos	4							0.804146	0.603305	-0.250709	0.547221	0.66479	0.0706614	0.000413898	2.7062e-05	FALSE
181.159	positive	-0.00666106	C12H20O	CHO_pos	3							0.924634	1.14742	0.464228	0.382364	6.38302e-05	1.41252e-05	3.52214e-07	3.52566e-08	FALSE
181.163	positive	-0.134328	[13C]C7H21NO3	[13C]CHNO3_pos	-1							1.27512	0.811147	0.412027	1.34248	0.311667	0.0350078	1.83148e-07	1.91638e-08	FALSE
181.195	positive	-0.0921261	C13H24	CH_pos	2							0.944924	0.234551	-0.0695228	-0.343003	0.861099	0.0895268	0.0169502	0.000944698	FALSE
181.997	positive											0.625618	1.24388	1.40678	1.52563	7.64285e-06	2.11571e-06	2.80706e-12	9.53149e-13	FALSE
182.009	positive											0.925431	1.21545	1.53173	0.677001	0.0026392	0.000417067	1.38552e-10	2.78299e-11	FALSE
182.045	positive	-0.077332	C8H7NO4	CHNO4_pos	6	diboa O-nitrophenyl acetate 3-aminobenzene-1,2-dicarboxylic acid 2-(4-hydroxy-3-nitrophenyl)acetaldehyde P-nitrophenylacetate 2-(4-nitrophenyl)acetic acid	HMDB0033733 HMDB0245261 HMDB0245819 HMDB0246445 HMDB0246538 HMDB0246546	Benzoxazines Phenol esters Benzene and substituted derivatives Phenols Phenol esters Benzene and substituted derivatives	C15770	NA NA NA NA NA NA		1.37277	0.971416	1.98867	1.76014	8.61916e-07	2.99728e-07	1.20836e-09	1.92229e-10	TRUE
182.066	positive	0.25848	C5H11NO6	CHNO6_pos	1	2-(hydroxymethyl)-2-[(nitrooxy)methyl]propane-1,3-diol	HMDB0256252	Organic oxoanionic compounds		NA		1.11335	1.42174	2.06194	1.46864	0.000330478	6.29265e-05	6.00959e-06	4.96752e-07	FALSE
182.081	positive	0.00331356	C9H11NO3	CHNO3_pos	5	L-tyrosine 2-tyrosine m-tyrosine tyrosin	HMDB0000158 HMDB0006050 HMDB0244981 HMDB0250803	Carboxylic acids and derivatives Carboxylic acids and derivatives Carboxylic acids and derivatives Carboxylic acids and derivatives	C00082 C01536	Phenylalanine and Tyrosine Metabolism | Tyrosine metabolism | Tyrosine metabolism NA NA NA	Phenylalanine and Tyrosine Metabolism | Tyrosine metabolism | Tyrosine metabolism	1.15794	1.2847	1.472	1.04145	2.33893e-11	5.53749e-11	1.71226e-16	9.88386e-16	FALSE
182.089	positive	0.0265073	[13C]C9H12O3	[13C]CHO3_pos	5							0.580609	0.775807	0.686318	0.598536	2.8233e-06	8.55551e-07	3.18407e-11	7.65065e-12	FALSE
182.094	positive											0.116651	1.01474	-0.251452	0.581408	0.729632	0.0769854	0.0232898	0.00128327	FALSE
182.102	positive	0.17339	C6H15NO5	CHNO5_pos	0	glucamine	HMDB0246693	Organooxygen compounds		NA		0.999556	1.12921	1.7021	1.90727	6.92705e-08	3.21252e-08	1.94819e-09	2.93915e-10	TRUE
182.118	positive	0.0287118	C10H15NO2	CHNO2_pos	4	4-(2-aminopropyl)-2-methoxyphenol 4-[2-(methylamino)propyl]benzene-1,2-diol 4-(2-aminoethyl)-2-ethoxyphenol oxilofrine methyl 8-methyl-8-azabicyclo[3.2.1]oct-2-ene-2-carboxylate thomasin 3-[1-hydroxy-2-(methylamino)propyl]phenol phenyldiethanolamine 4-methylpentyl 2-cyanoprop-2-enoate 5-(2-aminopropyl)cyclohexa-1,5-diene-1-carboxylic acid	HMDB0060748 HMDB0246034 HMDB0246284 HMDB0246455 HMDB0248436 HMDB0252100 HMDB0254276 HMDB0255226 HMDB0256677 HMDB0257834	Benzene and substituted derivatives Benzene and substituted derivatives Benzene and substituted derivatives Benzene and substituted derivatives Pyrrolidines Phenols Benzene and substituted derivatives Organonitrogen compounds Carboxylic acids and derivatives Carboxylic acids and derivatives		NA NA NA NA NA NA NA NA NA NA		1.10483	0.857198	1.08538	0.580942	1.37339e-05	3.54272e-06	8.6473e-11	1.84224e-11	FALSE
182.126	positive	-0.00331275	[13C]C10H16O2	[13C]CHO2_pos	4							1.00955	0.846569	0.402348	0.377103	0.000200423	3.9815e-05	6.11326e-07	5.87905e-08	FALSE
182.139	positive	0.0331251	C7H19NO4	CHNO4_pos	-1							0.891341	0.771673	0.805227	1.57677	0.0924941	0.0112893	2.46072e-06	2.15217e-07	FALSE
182.154	positive	-0.00110408	C11H19NO	CHNO_pos	3							0.949721	0.875554	0.658797	0.27078	0.000689974	0.000123105	0.0100327	0.000570304	FALSE
182.162	positive	0.0220806	[13C]C11H20O	[13C]CHO_pos	3							0.780703	0.821028	0.147582	0.294698	0.153207	0.0180701	0.000249847	1.67654e-05	FALSE
182.165	positive	0.0353283	C10H19N3	CHN3_pos	3	4-octyl-2H-1,2,3-triazole	HMDB0255811	Azoles		NA		0.662781	0.83847	0.74475	0.473653	0.285618	0.0322565	0.225574	0.0115134	FALSE
182.19	positive	-0.030908	C12H23N	CHN_pos	2	dicha	HMDB0251214	Organonitrogen compounds	C14686	NA		0.945331	0.757436	-0.204089	0.768244	0.66547	0.0707191	0.000196298	1.33233e-05	FALSE
182.902	positive											0.589312	0.87642	2.39147	1.63313	0.036657	0.0047587	1.61947e-05	1.256e-06	TRUE
182.981	positive											1.15212	1.9782	1.70433	0.972286	1.70468e-07	7.09354e-08	2.28848e-10	4.36182e-11	FALSE
183.018	positive											0.303472	1.0883	1.1079	1.7864	0.0320565	0.00420571	2.04033e-07	2.11574e-08	FALSE
183.026	positive											0.466674	1.21766	0.917943	1.55467	0.0154928	0.00214038	1.80635e-08	2.27499e-09	FALSE
183.029	positive	-0.162618	C8H6O5	CHO5_pos	6	2-hydroxybenzene-1,4-dicarboxylic acid	HMDB0245171	Benzene and substituted derivatives		NA		1.20094	0.972899	2.17292	1.35461	0.00010694	2.25763e-05	2.34246e-06	2.05839e-07	FALSE
183.063	positive											0.824955	1.1244	1.31378	1.2513	0.000198276	3.94489e-05	1.81385e-09	2.74846e-10	FALSE
183.065	positive	-0.0274638	C9H10O4	CHO4_pos	5	homovanillic acid dihydrocaffeic acid hydroxyphenyllactic acid mhpha 2,6-dimethoxybenzoic acid 3-(3,5-dihydroxyphenyl)propanoic acid 2,2-dihydroxy-3-phenylpropanoic acid ethyl protocatechuate syringaldehyde	HMDB0000118 HMDB0000423 HMDB0000755 HMDB0002643 HMDB0029273 HMDB0125533 HMDB0251348 HMDB0252031 HMDB0258653	Phenols Phenylpropanoic acids Phenylpropanoic acids Phenylpropanoic acids Benzene and substituted derivatives Phenylpropanoic acids Phenylpropanoic acids Benzene and substituted derivatives Phenols	C05582 C10447 C03672	Tyrosine metabolism NA NA NA NA NA NA NA NA	Tyrosine metabolism	1.5818	1.18851	1.17205	0.850647	3.94779e-09	2.7475e-09	2.26202e-15	5.03126e-15	FALSE
183.076	positive	-0.979848	C8H10N2O3	CHN2O3_pos	5	4-[ethyl(nitroso)amino]benzene-1,2-diol	HMDB0246019	Benzene and substituted derivatives		NA		0.657443	0.687459	1.00772	0.553313	0.0669766	0.00834574	0.000235729	1.5862e-05	FALSE
183.08	positive	-0.00659076	C13H10O	CHO_pos	9	2-(nona-1,7-dien-3,5-diyn-1-yl)furan	HMDB0248710	Heteroaromatic compounds		NA		1.14281	1.52648	0.933366	0.662299	2.36768e-09	1.81064e-09	6.50613e-13	2.82681e-13	FALSE
183.084	positive											0.670334	1.0005	0.405975	-0.580963	0.384058	0.0424584	0.0185448	0.00103025	FALSE
183.086	positive											1.95507	0.955837	1.29811	0.718226	7.31695e-13	9.98357e-12	2.85642e-07	2.89755e-08	FALSE
183.099	positive											0.718062	0.691734	0.637679	1.4098	0.00622888	0.000930186	1.26241e-06	1.15495e-07	FALSE
183.102	positive	-0.00219666	C10H14O3	CHO3_pos	4	mephenesin	HMDB0247880	Phenol ethers		NA		1.2344	1.23168	0.847786	0.535754	8.03001e-08	3.64258e-08	2.76288e-10	5.14864e-11	FALSE
183.117	positive	0.0735821	C14H14	CH_pos	8	dibenzyl	HMDB0244093	Stilbenes	C14685	NA		0.757075	1.1651	0.775175	0.732228	0.0104457	0.00149406	5.14308e-11	1.18189e-11	FALSE
183.129	positive											0.643753	0.772619	0.411293	-0.0362793	0.220408	0.0253221	0.866038	0.0418254	FALSE
183.138	positive	0.0230604	C11H18O2	CHO2_pos	3	methyl (4Z,8Z)-deca-4,8-dienoate	HMDB0034708	Fatty Acyls		NA		1.28108	0.853678	0.276409	0.248987	0.000757568	0.00013383	0.000392784	2.57579e-05	FALSE
183.149	positive	0.224001	C10H18N2O	CHN2O_pos	3							0.710433	0.341297	0.292087	0.303252	0.500544	0.0542943	0.106212	0.00557968	FALSE
183.174	positive	-0.00658736	C12H22O	CHO_pos	2							0.924706	0.800849	0.493696	0.318094	0.000139703	2.87895e-05	1.5648e-05	1.21516e-06	FALSE
183.211	positive	0.0186605	C13H26	CH_pos	1							0.88245	0.421545	0.6932	0.280981	0.0272765	0.00361795	0.00013693	9.46608e-06	FALSE
183.93	positive											0.85331	0.739229	2.12778	1.78268	0.00340376	0.000527754	3.15399e-12	1.04891e-12	TRUE
184.06	positive	-0.0218516	C8H9NO4	CHNO4_pos	5	pyridoxic acid dihydroxyphenylglycine [(3,5-dihydroxyphenyl)amino]acetic acid	HMDB0000017 HMDB0243702 HMDB0244908	Pyridines and derivatives Carboxylic acids and derivatives Carboxylic acids and derivatives	C00847	Vitamin B6 Metabolism NA NA	Vitamin B6 Metabolism	1.2947	1.04165	1.80613	1.50909	4.92189e-08	2.38054e-08	2.41824e-13	1.29137e-13	TRUE
184.069	positive	0.164972	[13C]C8H10O4	[13C]CHO4_pos	5							1.5387	0.615913	2.03875	0.704246	6.92807e-05	1.52144e-05	0.000827427	5.22131e-05	FALSE
184.076	positive	-0.0557169	C12H9NO	CHNO_pos	9	3H-phenoxazine phenoxazine	HMDB0246271 HMDB0256415	Benzoxazines Benzoxazines		NA NA		1.66801	0.790655	1.40102	1.00709	9.16732e-11	1.3277e-10	1.25492e-09	1.98983e-10	FALSE
184.084	positive	0.0218488	[13C]C12H10O	[13C]CHO_pos	9							0.577955	1.48927	0.969545	0.644131	0.00328805	0.000511037	1.41113e-12	5.31239e-13	FALSE
184.087	positive	-1.38519	C11H9N3	CHN3_pos	9							2.13373	0.768034	1.32845	0.6233	1.30903e-12	9.29748e-12	1.14709e-08	1.49276e-09	FALSE
184.097	positive	0.00327708	C9H13NO3	CHNO3_pos	4	epinephrine (+/-)-normetanephrine levonordefrin 2-ethyl-3-hydroxy-1-(2-hydroxyethyl)pyridin-4-one 3-hydroxy-1-(3-hydroxypropyl)-2-methylpyridin-4-one 2-amino-3-(4-hydroxyphenyl)propane-1,1-diol	HMDB0000068 HMDB0000819 HMDB0015652 HMDB0244490 HMDB0250502 HMDB0257983	Phenols Phenols Benzene and substituted derivatives Pyridines and derivatives Pyridines and derivatives Benzene and substituted derivatives	C00788 C05589 C11768	Tyrosine metabolism | Tyrosine metabolism Tyrosine metabolism NA NA NA NA	Tyrosine metabolism | Tyrosine metabolism | Tyrosine metabolism	1.31458	1.23479	1.35447	1.10535	5.10091e-08	2.45568e-08	2.25744e-15	5.06756e-15	FALSE
184.105	positive	0.0262155	[13C]C9H14O3	[13C]CHO3_pos	4							0.953614	1.14682	0.842374	0.41305	1.37413e-06	4.51789e-07	6.78216e-06	5.55875e-07	FALSE
184.112	positive	-0.0305836	C13H13N	CHN_pos	8	benzhydrylamin	HMDB0248313	Benzene and substituted derivatives		NA		1.42369	0.611254	1.28943	0.793199	1.54573e-09	1.28849e-09	8.01329e-11	1.72383e-11	FALSE
184.133	positive	-0.0262115	C10H17NO2	CHNO2_pos	3	dimerin	HMDB0015239	Piperidines		NA		1.26302	0.779056	0.963645	0.587563	1.23475e-08	7.16914e-09	3.02538e-08	3.65278e-09	FALSE
184.141	positive	-0.00327629	[13C]C10H18O2	[13C]CHO2_pos	3							1.46976	1.00354	0.100182	0.219342	0.347722	0.0386556	0.00359863	0.000213263	FALSE
184.17	positive	0.0535045	C11H21NO	CHNO_pos	2							1.12349	0.783675	0.927409	0.834041	2.65421e-05	6.41575e-06	1.17929e-08	1.52892e-09	FALSE
184.178	positive	0.0218376	[13C]C11H22O	[13C]CHO_pos	2							1.07705	0.589084	0.273776	0.176129	0.0421194	0.00541762	0.0090161	0.000514324	FALSE
184.914	positive											0.667932	0.661602	1.24376	1.00936	0.0457453	0.00584918	0.00579101	0.000337414	FALSE
184.938	positive											1.77427	0.976249	1.63153	1.22135	1.11533e-06	3.75265e-07	1.02985e-07	1.11763e-08	FALSE
184.943	positive											0.730492	1.00676	1.36242	1.19752	6.83128e-08	3.17378e-08	0.000247336	1.6606e-05	FALSE
184.979	positive											0.60146	0.780163	1.73736	1.22909	0.073148	0.00906896	5.03243e-07	4.92958e-08	FALSE
184.985	positive											0.720906	0.688291	2.68235	0.510448	0.0361284	0.00470067	0.142258	0.00738846	FALSE
185.042	positive											0.629643	1.01865	1.50328	1.31982	0.0774756	0.00955523	7.38793e-07	6.99118e-08	FALSE
185.044	positive	0.00217347	C8H8O5	CHO5_pos	5	dihydroxymandelic acid 3,5-dihydroxy-4-methoxybenzoic acid methyl gallate	HMDB0001866 HMDB0013198 HMDB0254590	Phenols Benzene and substituted derivatives Benzene and substituted derivatives	C05580	Tyrosine metabolism NA NA	Tyrosine metabolism	1.20291	0.844808	1.51326	1.12838	1.06522e-06	3.59806e-07	3.1046e-08	3.74097e-09	FALSE
185.066	positive											0.446377	0.438569	0.839667	1.33255	0.220999	0.0253845	1.49213e-06	1.35084e-07	FALSE
185.078	positive	0.00108654	C5H8N6O2	CHN6O2_pos	5							0.786969	1.07868	0.284247	1.79784	0.604394	0.0645728	6.21321e-07	5.96098e-08	FALSE
185.081	positive	-0.0271631	C9H12O4	CHO4_pos	4	methoxyhydroxyphenylglycol ubiquinol-0	HMDB0001490 HMDB0246128	Phenols Prenol lipids	C05594	Tyrosine metabolism NA	Tyrosine metabolism	1.62468	1.30341	1.14303	0.895871	1.75838e-10	2.19686e-10	1.37487e-14	1.55035e-14	FALSE
185.085	positive	-0.478059	[13C]C4H13NO6	[13C]CHNO6_pos	0							1.89475	0.718358	1.34587	0.645546	4.16051e-09	2.86478e-09	5.56504e-08	6.39127e-09	FALSE
185.087	positive											2.05816	1.05871	1.2376	0.603487	3.1836e-08	1.63109e-08	9.59865e-12	2.69342e-12	FALSE
185.092	positive	-0.371568	C8H12N2O3	CHN2O3_pos	4	barbital	HMDB0248870	Diazines		NA		0.934134	1.01469	1.62377	1.58323	1.50871e-05	3.85914e-06	1.47686e-07	1.56628e-08	TRUE
185.096	positive	-0.875664	C13H12O	CHO_pos	8	(phenoxymethyl)benzene	HMDB0249075	Phenol ethers		NA		0.528933	0.882755	0.571684	0.689646	0.171813	0.0200728	7.37959e-08	8.28296e-09	FALSE
185.115	positive	0.0260718	C6H12N6O	CHN6O_pos	4							0.414223	0.263065	0.419999	0.546228	0.0151959	0.00210161	0.504946	0.0249837	FALSE
185.117	positive	-0.00217262	C10H16O3	CHO3_pos	3	1-methyl-4-(prop-1-en-2-yl)-7,8,9-trioxabicyclo[4.2.1]nonane	HMDB0257077	Oxepanes		NA		1.15509	1.03434	0.56253	0.513794	6.02817e-07	2.17808e-07	1.47165e-07	1.56144e-08	FALSE
185.128	positive	0.0879855	C9H16N2O2	CHN2O2_pos	3	1-hydroxy-2,2,5,5-tetramethylpyrrole-3-carboxamide 2,2,3,3-tetramethylcyclopropanecarbonylurea (2-isopropylpent-4-enoyl)urea 1-acetyl-1-isopropyl-3-(prop-2-en-1-yl)urea	HMDB0243893 HMDB0245339 HMDB0248536 HMDB0258084	Pyrrolines Organic carbonic acids and derivatives Organic carbonic acids and derivatives Organic carbonic acids and derivatives		NA NA NA NA		0.506306	0.939369	0.819206	1.20632	0.193613	0.0224277	1.83325e-05	1.41411e-06	FALSE
185.132	positive	0.0184657	C14H16	CH_pos	7							0.312286	0.96078	0.515494	0.537688	0.00288166	0.000452212	4.11663e-10	7.30096e-11	FALSE
185.154	positive	0.0228079	C11H20O2	CHO2_pos	2	desenex 2-ethylhexyl acrylate 8-cyclopropyloctanoic acid	HMDB0033724 HMDB0245119 HMDB0250676	Fatty Acyls Carboxylic acids and derivatives Fatty Acyls	C13910 C19420	NA NA NA		1.18445	1.10419	0.486185	0.351917	1.62847e-06	5.26071e-07	6.40963e-07	6.13486e-08	FALSE
185.165	positive	0.00434411	C10H20N2O	CHN2O_pos	2							1.41839	1.39785	1.30483	1.35167	9.99632e-08	4.39236e-08	1.12216e-17	6.80146e-16	FALSE
185.19	positive	-0.00651527	C12H24O	CHO_pos	1							0.776006	0.89473	0.123835	0.28762	0.345996	0.0384803	0.000181723	1.23791e-05	FALSE
185.928	positive											0.86283	0.631962	2.10203	0.807726	0.0458829	0.00586389	0.106882	0.00561364	FALSE
185.969	positive											0.773025	0.879979	1.05079	1.72726	0.00648589	0.000964676	7.97036e-12	2.29768e-12	FALSE
186.022	positive											0.310134	0.72775	0.943766	1.35729	0.00385451	0.000591628	0.000177136	1.20768e-05	FALSE
186.04	positive	-0.0464783	C7H7NO5	CHNO5_pos	5							0.740053	0.995613	1.31279	1.24938	0.164311	0.0192833	0.00160004	9.82563e-05	FALSE
186.076	positive	-0.0216136	C8H11NO4	CHNO4_pos	4	2-aminobicyclo[3.1.0]hexane-2,6-dicarboxylic acid	HMDB0244794	Carboxylic acids and derivatives		NA		1.25903	1.14537	1.51908	1.41473	1.50648e-10	1.96749e-10	1.53542e-13	9.30622e-14	FALSE
186.084	positive	0.00108063	[13C]C8H12O4	[13C]CHO4_pos	4							1.21807	0.944353	1.51988	1.29678	9.65922e-05	2.06609e-05	1.21333e-06	1.11425e-07	FALSE
186.091	positive											0.189907	0.758292	0.267595	-0.01553	0.435111	0.0476554	0.939305	0.045157	FALSE
186.097	positive	0.0907667	C5H15NO6	CHNO6_pos	-1							0.640896	1.28229	2.32695	1.96563	6.51074e-05	1.43527e-05	6.80511e-06	5.57567e-07	TRUE
186.112	positive	0.0032414	C9H15NO3	CHNO3_pos	3	5-[1-hydroxy-2-(methylamino)ethyl]cyclohexa-2,4-diene-1,2-diol	HMDB0246263	Organooxygen compounds		NA		1.15414	0.893398	1.10322	1.01347	3.02249e-10	3.43668e-10	1.55534e-09	2.40637e-10	FALSE
186.121	positive	-0.0280909	[13C]C9H16O3	[13C]CHO3_pos	3							1.34577	1.35163	0.445145	0.226425	0.000747057	0.000132198	0.0226344	0.0012483	FALSE
186.128	positive	-0.138288	C13H15N	CHN_pos	7	indanamin	HMDB0244479	Indanes		NA		0.669786	0.458283	1.03423	0.711298	0.00153535	0.000254333	4.30776e-08	5.04775e-09	FALSE
186.136	positive	-0.00756231	[13C]C13H16	[13C]CH_pos	7							0.734406	0.222089	0.877267	0.258522	0.0192261	0.00261367	0.0453866	0.00245069	FALSE
186.149	positive	0.0280866	C10H19NO2	CHNO2_pos	2	1-methylpiperidin-4-yl butanoate 2-(diethylamino)ethyl 2-methylprop-2-enoate	HMDB0243943 HMDB0244939	Fatty Acyls Carboxylic acids and derivatives		NA NA		1.35375	0.703146	0.664322	0.766393	8.58828e-06	2.33995e-06	5.95316e-08	6.80157e-09	FALSE
186.157	positive	-0.00324062	[13C]C10H20O2	[13C]CHO2_pos	2							1.34293	1.02092	0.346369	0.356339	0.00037855	7.10623e-05	3.37009e-06	2.88812e-07	FALSE
186.185	positive	-0.00108004	C11H23NO	CHNO_pos	1							0.902733	1.07998	0.756193	0.652647	8.5275e-07	2.97738e-07	3.43174e-10	6.23686e-11	FALSE
186.193	positive	0.0215999	[13C]C11H24O	[13C]CHO_pos	1							0.919069	0.192099	-0.342535	-0.0296287	0.0304507	0.00400618	0.792835	0.0384971	FALSE
186.222	positive	-0.19221	C12H27N	CHN_pos	0	N-dodecylamine tributylamine	HMDB0251571 HMDB0259165	Organonitrogen compounds Organonitrogen compounds		NA NA		0.973728	1.0196	1.16613	1.38961	3.79449e-09	2.66586e-09	1.52192e-10	3.01451e-11	FALSE
186.936	positive											0.674854	1.04717	1.12026	1.19008	1.88125e-05	4.70985e-06	2.27235e-08	2.8022e-09	FALSE
186.953	positive											1.32025	2.11901	1.97551	1.05381	2.77776e-07	1.10026e-07	1.076e-15	3.26083e-15	FALSE
186.959	positive											0.578018	1.2342	1.09126	1.88788	0.00284823	0.000447372	4.56505e-10	8.01417e-11	FALSE
186.991	positive											1.1626	0.699453	1.89891	1.45682	0.000345952	6.556e-05	5.96421e-08	6.81098e-09	FALSE
187.021	positive											0.889791	1.43241	1.12946	1.2916	0.0290983	0.00383896	3.07534e-05	2.3005e-06	FALSE
187.028	positive											0.556458	0.701378	0.612961	1.01879	0.388585	0.0429222	0.000947491	5.93262e-05	FALSE
187.058	positive											0.568389	1.00731	1.01295	1.50071	0.00329402	0.000511657	1.69274e-06	1.52109e-07	FALSE
187.06	positive	0.00214993	C8H10O5	CHO5_pos	4							1.09383	0.88587	1.26528	1.07962	6.81936e-09	4.2651e-09	6.69796e-13	2.89459e-13	FALSE
187.071	positive	0.0376215	C7H10N2O4	CHN2O4_pos	4	AMPA 2-amino-2-(5-methyl-3-oxo-2H-1,2-oxazol-4-yl)propanoic acid	HMDB0248356 HMDB0257684	Carboxylic acids and derivatives Carboxylic acids and derivatives	C13672	NA NA		1.15301	1.14319	1.97339	1.39402	0.00894749	0.0012984	6.5066e-08	7.38862e-09	FALSE
187.075	positive	-0.138659	C12H10O2	CHO2_pos	8	biphenol 1-acetoxynaphthalene naphthalen-2-yl acetate 4-methoxynaphthalene-1-carbaldehyde β-naphthaleneacetic acid 6-methoxynaphthalene-2-carbaldehyde	HMDB0243757 HMDB0243958 HMDB0245250 HMDB0246489 HMDB0246987 HMDB0247086	Benzene and substituted derivatives Naphthalenes Naphthalenes Naphthalenes Naphthalenes Naphthalenes		NA NA NA NA NA NA		1.19399	0.598781	1.27112	0.724354	5.99416e-05	1.33673e-05	5.20752e-11	1.19106e-11	FALSE
187.094	positive	-1.80023	[13C]C11H11NO	[13C]CHNO_pos	8							0.578149	0.720485	-0.0173414	0.876874	0.983996	0.101028	0.028583	0.00156462	FALSE
187.096	positive	0.0268688	C9H14O4	CHO4_pos	3	1-methylcyclohexane-1,2-dicarboxylic acid 4-methylcyclohexane-1,2-dicarboxylic acid	HMDB0243937 HMDB0253138	Carboxylic acids and derivatives Carboxylic acids and derivatives		NA NA		1.37106	1.34288	1.02196	0.780729	1.23559e-09	1.08216e-09	3.16614e-13	1.58596e-13	FALSE
187.108	positive	0.331004	C8H14N2O3	CHN2O3_pos	3							1.02547	1.08244	1.92628	1.59349	0.000818234	0.000143374	1.6174e-08	2.05302e-09	TRUE
187.112	positive	-0.00644799	C13H14O	CHO_pos	7							0.516375	1.59034	0.575093	0.593691	0.000347496	6.58286e-05	1.37777e-11	3.66661e-12	FALSE
187.133	positive	0.0515781	C10H18O3	CHO3_pos	2	10-hydroxydec-2-enoic acid cyclohexyl isopropyl carbonate	HMDB0244269 HMDB0250658	Hydroxy acids and derivatives Organic carbonic acids and derivatives		NA NA		1.03898	1.43189	0.981727	0.690866	3.5312e-12	1.76047e-11	2.19803e-13	1.20292e-13	FALSE
187.144	positive	0.301928	C9H18N2O2	CHN2O2_pos	2	1-hydroxy-2,2,5,5-tetramethylpyrrolidine-3-carboxamide dimethyl pimelimidate	HMDB0243894 HMDB0251389	Pyrrolidines Carboximidic acids and derivatives		NA NA		1.28404	0.831275	1.12185	1.17225	0.0270884	0.00359668	2.04665e-07	2.12139e-08	FALSE
187.148	positive	0.0182657	C14H18	CH_pos	6							0.514149	1.22126	0.61646	0.478648	2.7225e-05	6.55941e-06	1.40128e-08	1.78993e-09	FALSE
187.152	positive	-0.212737	[13C]C9H19NO2	[13C]CHNO2_pos	2							1.09308	0.622048	0.814704	1.49364	0.0992074	0.0120435	8.40752e-05	5.96178e-06	FALSE
187.169	positive	0.022561	C11H22O2	CHO2_pos	1	2-propyloctanoic acid	HMDB0248629	Fatty Acyls		NA		1.07221	1.07315	0.55589	0.462894	6.02437e-05	1.34232e-05	4.3626e-08	5.10954e-09	FALSE
187.189	positive	0.0268555	[13C]C10H23NO	[13C]CHNO_pos	1							0.809804	0.805071	0.090969	0.908661	0.835838	0.0871626	5.79112e-05	4.18482e-06	FALSE
187.967	positive											0.572746	1.20588	2.99437	1.0504	0.00943281	0.0013612	6.10792e-06	5.04021e-07	FALSE
188.055	positive	0.221333	C7H9NO5	CHNO5_pos	4	4-amino-2-oxabicyclo[3.1.0]hexane-4,6-dicarboxylic acid	HMDB0242337	Carboxylic acids and derivatives		NA		1.12144	1.0985	2.22675	1.64593	1.76875e-06	5.64009e-07	8.24726e-06	6.68052e-07	TRUE
188.092	positive	-0.0213807	C8H13NO4	CHNO4_pos	3	3-hydroxy-N-(2-oxooxolan-3-yl)butanamide	HMDB0243607	Carboxylic acids and derivatives		NA		1.19663	1.08684	1.19099	1.24745	3.95709e-08	1.96524e-08	4.85452e-14	3.76018e-14	FALSE
188.1	positive	0.00106899	[13C]C8H14O4	[13C]CHO4_pos	3							1.16103	1.06376	1.33914	0.80633	3.68692e-07	1.41079e-07	1.95684e-06	1.7378e-07	FALSE
188.107	positive	0.0523785	C12H13NO	CHNO_pos	7							0.97528	0.502752	1.28401	0.502082	1.99405e-05	4.97064e-06	2.39525e-06	2.09869e-07	FALSE
188.115	positive	0.235159	[13C]C12H14O	[13C]CHO_pos	7							1.13494	0.574858	1.0862	0.495881	0.000127818	2.65726e-05	9.11828e-09	1.21464e-09	FALSE
188.128	positive	0.00320648	C9H17NO3	CHNO3_pos	2	[(1-hydroxyheptylidene)amino]acetic acid 1-hydroxy-2,2,5,5-tetramethylpyrrolidine-3-carboxylic acid pivagabine 2-[(2-hydroxybut-3-en-1-yl)amino]-3-methylbutanoic acid	HMDB0013010 HMDB0243895 HMDB0246575 HMDB0253927	Carboxylic acids and derivatives Pyrrolidines Carboxylic acids and derivatives Carboxylic acids and derivatives		NA NA NA NA		1.21856	0.633734	0.738108	0.470399	3.98816e-09	2.77187e-09	9.42566e-05	6.6256e-06	FALSE
188.136	positive	0.0256508	[13C]C9H18O3	[13C]CHO3_pos	2							1.22138	1.1622	0.840559	0.605657	0.000163851	3.33156e-05	2.20314e-09	3.29915e-10	FALSE
188.143	positive	0.130386	C13H17N	CHN_pos	6	D-deprenyl 1-methyl-4-(2-methylphenyl)-3,6-dihydro-2H-pyridine	HMDB0015171 HMDB0254279	Benzene and substituted derivatives Benzene and substituted derivatives	C07245	NA NA		0.353983	0.265381	0.734869	0.191353	0.0732536	0.00907772	0.139429	0.00724774	FALSE
188.151	positive	-0.11435	[13C]C13H18	[13C]CH_pos	6							0.435628	0.567032	0.488981	0.340825	0.0944589	0.0115102	0.000488496	3.16662e-05	FALSE
188.164	positive	-0.0256469	C10H21NO2	CHNO2_pos	1							1.31153	0.969125	0.887423	0.994099	5.79057e-09	3.72038e-09	1.94297e-10	3.76244e-11	FALSE
188.173	positive	-0.00320572	[13C]C10H22O2	[13C]CHO2_pos	1							1.31314	1.07947	-0.00626586	-0.113938	0.982329	0.100877	0.405329	0.0202324	FALSE
188.201	positive	0.105773	C11H25NO	CHNO_pos	0							1.18616	0.802203	0.510795	1.63409	0.332655	0.0371559	6.64172e-07	6.33449e-08	FALSE
188.974	positive											0.535298	1.02547	1.21875	1.44663	0.122609	0.0146883	0.000193323	1.31324e-05	FALSE
188.984	positive											0.481119	0.914814	0.722928	0.687136	0.340598	0.0379369	0.0133939	0.000752369	FALSE
189.001	positive											0.436394	1.35486	1.09202	1.51401	0.229204	0.0262629	0.000252308	1.69165e-05	FALSE
189.007	positive											0.952271	0.854819	2.55365	1.44294	0.000547498	9.94297e-05	0.000252955	1.69552e-05	FALSE
189.024	positive											0.679701	0.428624	3.72454	1.07445	0.0133741	0.00187262	5.98593e-05	4.31787e-06	FALSE
189.037	positive											0.7917	1.078	2.15944	1.47983	0.0158191	0.00217908	1.12705e-05	8.95002e-07	FALSE
189.043	positive											0.343951	0.678868	0.806246	1.56099	0.208089	0.0239973	0.00021414	1.44776e-05	FALSE
189.055	positive	-0.00212712	C11H8O3	CHO3_pos	8	1-hydroxy-2-naphthoic acid plumbagin	HMDB0243892 HMDB0256646	Naphthalenes Naphthalenes	C03203 C10387	NA NA		1.11006	0.949861	1.15794	1.02512	0.000408411	7.61714e-05	3.8873e-05	2.8698e-06	FALSE
189.07	positive	-0.0893319	[13C]C5H9N3O4	[13C]CHN3O4_pos	4							0.833366	1.60964	2.77682	2.07409	0.0381253	0.00493572	5.83009e-05	4.21047e-06	TRUE
189.076	positive	0.00212688	C8H12O5	CHO5_pos	3	3-[(3-oxobutanoyl)oxy]butanoic acid	HMDB0258085	Keto acids and derivatives		NA		1.04403	1.15659	1.36442	1.24522	2.8947e-08	1.5069e-08	1.72053e-12	6.2726e-13	FALSE
189.087	positive	-0.334964	C7H12N2O4	CHN2O4_pos	3	2-amino-6-carbamoyl-5-oxohexanoic acid [(4-hydroxypyrrolidin-2-yl)formamido]acetic acid 1-(1H-imidazol-2-yl)butane-1,4,4,4-tetrol	HMDB0252618 HMDB0253018 HMDB0258912	Carboxylic acids and derivatives Carboxylic acids and derivatives Organooxygen compounds		NA NA NA		1.25175	0.920839	3.04834	1.66171	7.31391e-06	2.041e-06	8.46377e-08	9.35264e-09	TRUE
189.091	positive	-0.0308373	C12H12O2	CHO2_pos	7	3-butylidene-2-benzofuran-1-one	HMDB0245829	Isocoumarans		NA		1.11289	1.19147	1.10866	0.712014	1.96327e-06	6.19181e-07	3.41355e-12	1.11987e-12	FALSE
189.112	positive	0.0265809	C9H16O4	CHO4_pos	2	azelaic acid (2S)-2-pentylbutanedioic acid	HMDB0000784 HMDB0011717	Fatty Acyls Fatty Acyls	C08261	NA NA		1.21165	1.34147	1.12367	0.875271	3.64986e-10	3.98402e-10	4.782e-14	3.72783e-14	FALSE
189.127	positive	-0.0063789	C13H16O	CHO_pos	6							1.09959	1.55026	0.791734	0.565839	1.23691e-06	4.11633e-07	9.34465e-11	1.97346e-11	FALSE
189.131	positive	-0.660202	[13C]C8H17NO3	[13C]CHNO3_pos	2							1.1422	0.62352	0.76324	0.592409	0.00122909	0.000208191	0.0144705	0.000810594	FALSE
189.149	positive	0.0510255	C10H20O3	CHO3_pos	1	S-3-hydroxydecanoic acid 10-hydroxydecanoic acid methyl 9-hydroxynonanoate	HMDB0002203 HMDB0244272 HMDB0254571	Hydroxy acids and derivatives Hydroxy acids and derivatives Fatty Acyls	C02774	NA NA NA		1.41241	1.19305	0.395491	0.32362	0.0072855	0.00107344	0.0011262	7.00813e-05	FALSE
189.164	positive	0.0180701	C14H20	CH_pos	5	pentacyclo[7.3.1.1^{4,12}.0^{2,7}.0^{6,11}]tetradecane 1,1,2,6-tetramethyl-3,4-dihydro-2H-naphthalene	HMDB0251132 HMDB0253579	Polycyclic hydrocarbons Tetralins		NA NA		1.79097	1.59916	1.11084	0.597366	2.19578e-09	1.70688e-09	1.28311e-10	2.61412e-11	FALSE
189.168	positive	-0.157312	[13C]C9H21NO2	[13C]CHNO2_pos	1							0.930743	0.536621	1.83049	1.1979	1.17059e-05	3.0809e-06	3.25673e-06	2.7969e-07	FALSE
189.185	positive	-0.0839632	C11H24O2	CHO2_pos	0							1.015	0.533935	0.175009	0.811034	0.569902	0.0612283	2.10167e-06	1.8569e-07	FALSE
189.966	positive											0.976133	0.719182	1.84529	1.16728	0.0153048	0.00211553	0.000191977	1.30446e-05	FALSE
189.993	positive											0.94712	0.8408	1.91895	1.34959	2.7337e-06	8.30827e-07	0.000339007	2.23888e-05	FALSE
190.05	positive	0.161868	C10H7NO3	CHNO3_pos	8	2-oxo-1H-quinoline-3-carboxylic acid 4-oxo-1H-quinoline-3-carboxylic acid α-cyano-4-hydroxycinnamic acid	HMDB0000715 HMDB0245167 HMDB0246559 HMDB0248196	Quinolines and derivatives Quinolines and derivatives Quinolines and derivatives Cinnamic acids and derivatives	C01717	Tryptophan metabolism NA NA NA	Tryptophan metabolism	1.23767	0.97631	2.31296	1.47952	0.0171543	0.0023474	7.15378e-06	5.84161e-07	FALSE
190.071	positive	0.0602971	C7H11NO5	CHNO5_pos	3	4-(carboxymethylcarbamoyl)butanoic acid N-acetyl-L-glutamate	HMDB0000590 HMDB0001138	Carboxylic acids and derivatives Carboxylic acids and derivatives	C00624	NA NA		0.852789	1.08468	1.66555	1.42719	8.80717e-09	5.30979e-09	2.19063e-11	5.48092e-12	FALSE
190.086	positive	-0.18405	C11H11NO2	CHNO2_pos	7	indolylpropionic acid phensuximide 3-methyl-3-phenylpyrrolidine-2,5-dione	HMDB0002302 HMDB0014970 HMDB0029738 HMDB0245217	Indoles and derivatives Pyrrolidines Indoles and derivatives Pyrrolidines	C07437	NA NA NA NA		0.610033	0.677776	0.759111	0.974204	0.0281714	0.00372807	1.26629e-05	9.99026e-07	FALSE
190.094	positive	0.314141	[13C]C11H12O2	[13C]CHO2_pos	7							1.79541	0.874603	1.39538	0.957122	7.167e-08	3.309e-08	2.9191e-06	2.52394e-07	FALSE
190.107	positive	-0.0211528	C8H15NO4	CHNO4_pos	2	(2S)-2-{[(1R)-1-carboxyethyl]amino}-3-methylbutanoic acid octahydroindolizine-1,6,7,8-tetrol 2-amino-4-(tert-butoxy)-4-oxobutanoic acid	HMDB0240627 HMDB0249700 HMDB0253009	Carboxylic acids and derivatives Indolizidines Carboxylic acids and derivatives		NA NA NA		1.19847	1.16553	1.3021	1.32117	1.56586e-10	2.0096e-10	1.43899e-13	8.83217e-14	FALSE
190.116	positive	0.212577	[13C]C8H16O4	[13C]CHO4_pos	2							1.09993	0.835231	0.684942	1.18964	0.0750571	0.00928345	8.79905e-06	7.08722e-07	FALSE
190.123	positive	0.0518202	C12H15NO	CHNO_pos	6	[1-(1-benzofuran-5-yl)propan-2-yl](methyl)amine 2-[(dimethylamino)methyl]-1-phenylprop-2-en-1-one 4-benzoylpiperidine	HMDB0243800 HMDB0244941 HMDB0256431	Benzofurans Benzene and substituted derivatives Organooxygen compounds		NA NA NA		1.03253	0.654564	0.997115	0.608675	0.00501313	0.000758685	1.27778e-07	1.36711e-08	FALSE
190.131	positive	-0.0317253	[13C]C12H16O	[13C]CHO_pos	6							0.575483	1.21549	0.65026	0.569424	0.0385525	0.00498356	9.77476e-10	1.5841e-10	FALSE
190.144	positive	0.00317231	C9H19NO3	CHNO3_pos	1							1.25182	1.29077	1.28912	1.20261	5.0235e-10	5.13734e-10	1.61677e-12	5.95703e-13	FALSE
190.159	positive	0.2876	C13H19N	CHN_pos	5							0.622966	0.586648	0.773038	0.673712	0.00324327	0.000504833	1.11286e-05	8.84896e-07	FALSE
190.167	positive	-0.0602665	[13C]C13H20	[13C]CH_pos	5							1.36494	0.514842	1.1422	0.41091	1.49567e-07	6.29965e-08	2.79885e-05	2.1106e-06	FALSE
190.18	positive	0.186073	C10H23NO2	CHNO2_pos	0							1.11823	0.71193	1.46703	1.22314	9.42631e-07	3.22816e-07	7.2293e-08	8.1331e-09	FALSE
190.924	positive											1.40738	1.34163	1.64994	1.34608	2.92036e-07	1.15147e-07	9.95035e-15	1.24994e-14	FALSE
190.998	positive	1.3706	C9H2O5	CHO5_pos	9							1.15745	1.06765	1.59132	0.959509	1.01273e-05	2.71224e-06	1.22662e-08	1.58183e-09	FALSE
191	positive											0.877039	0.751541	1.36634	1.55011	0.00315032	0.000491545	1.98709e-06	1.76208e-07	FALSE
[truncated: 3,059 more rows]
